# Supplementary material for: Accelerated Molecular Dynamics for Peptide Folding: Benchmarking Different Combinations of Force Fields and Explicit Solvent Models
Source: PubMed Central journal article supplement (PMC10207344; doi:10.1021/acs.jcim.3c00138), 2023-05-10
Supplement: ci3c00138_si_001.pdf [file ci3c00138_si_001.pdf]

# Supporting Information

## Accelerated Molecular Dynamics for Peptide Folding: Benchmarking Different Combinations of Amber Force Fields and Explicit Solvent Models

*Crescenzo Coppa,<sup>‡</sup> Andrea Bazzoli,<sup>‡</sup> Maral Barkhordari, Alessandro Contini\**

Dipartimento di Scienze Farmaceutiche – Sezione di Chimica Generale e Organica “Alessandro Marchesini”, Università degli Studi di Milano, Via Venezian, 21 20133 Milano, Italy

## Index

|                                                                             |     |
|-----------------------------------------------------------------------------|-----|
| 1. Total potential energy and dihedral energy obtained from cMD simulations | S4  |
| 2. Input parameters used in aMD simulations                                 | S6  |
| 3. RMSD vs time plots                                                       | S9  |
| 4. DSSP analyses                                                            | S13 |
| 5. Results of H1 peptide trajectory analyses                                | S18 |
| a) PMF                                                                      | S18 |
| b) Clusters                                                                 | S30 |
| c) Hbonds                                                                   | S30 |
| d) CD                                                                       | S32 |
| 6. Results of H2 peptide trajectory analyses                                | S33 |
| a) PMF                                                                      | S33 |
| b) Clusters                                                                 | S39 |
| c) Hbonds                                                                   | S39 |
| d) PMF from ff15ipq-m                                                       | S40 |
| 7. Results of B1 peptide trajectory analyses                                | S42 |
| a) PMF                                                                      | S42 |
| b) Clusters                                                                 | S54 |
| c) Hbonds                                                                   | S54 |
| 8. Results of B1 uncapped peptide trajectory analyses                       | S56 |
| a) DSSP                                                                     | S56 |
| b) PMF                                                                      | S57 |
| c) Clusters                                                                 | S61 |
| d) Hbonds                                                                   | S61 |
| 9. Results of B2 peptide trajectory analyses                                | S62 |
| a) PMF                                                                      | S62 |
| b) Clusters                                                                 | S68 |
| c) Hbonds                                                                   | S68 |
| 10. Results of B3 peptide trajectory analyses                               | S70 |
| a) PMF                                                                      | S70 |
| b) Clusters                                                                 | S82 |
| c) Hbonds                                                                   | S82 |

|                                                |      |
|------------------------------------------------|------|
| 11. Results of ID1 peptide trajectory analyses | S84  |
| a) PMF                                         | S84  |
| b) Clusters                                    | S96  |
| c) Hbonds                                      | S96  |
| d) Radius of gyration                          | S98  |
| e) CD                                          | S98  |
| 12. Results of ID2 peptide trajectory analyses | S99  |
| a) PMF                                         | S99  |
| b) Clusters                                    | S117 |
| c) Hbonds                                      | S118 |
| d) Radius of gyration                          | S121 |
| 13. Results of ID3 peptide trajectory analyses | S105 |
| a) PMF                                         | S105 |
| b) Clusters                                    | S117 |
| c) Hbonds                                      | S119 |
| d) Radius of gyration                          | S121 |
| 14. PDB coordinate of the starting structures. | S122 |
| a) H1 extended                                 | S122 |
| b) H1 misfolded                                | S123 |
| c) H2 extended                                 | S124 |
| d) H2 misfolded                                | S124 |
| e) B1 extended                                 | S125 |
| f) B1 misfolded                                | S126 |
| g) B2 extended                                 | S127 |
| h) B2 misfolded                                | S128 |
| i) B3 extended                                 | S129 |
| j) B3 misfolded                                | S130 |
| k) ID1 extended                                | S131 |
| l) ID1 misfolded                               | S132 |
| m) ID2 extended                                | S133 |
| n) ID2 misfolded                               | S134 |
| o) ID3 extended                                | S135 |
| p) ID3 misfolded                               | S136 |

**Table S1.** Total Potential Energy (EPTOT) Average and dihedral angle (DHIED) average values obtained by cMD

| <b>ff99SB TIP3P</b> | <b>Average EPTOT*</b> | <b>Average DHIED*</b> |
|---------------------|-----------------------|-----------------------|
| H1 EXTENDED         | -24216.6              | 171.0                 |
| H1 MISFOLDED        | -27050.1              | 172.3                 |
| H2 EXTENDED         | -10078.0              | 58.3                  |
| H2 MISFOLDED        | -10244.8              | 60.0                  |
| B1 EXTENDED         | -30044.5              | 165.0                 |
| B1 MISFOLDED        | -23632.6              | 168.4                 |
| B2 EXTENDED         | -22522.8              | 135.8                 |
| B2 MISFOLDED        | -22541.2              | 139.2                 |
| B3 EXTENDED         | -34514.5              | 159.1                 |
| B3 MISFOLDED        | -22223.9              | 162.8                 |
| ID1 EXTENDED        | -15929.4              | 150.4                 |
| ID1 MISFOLDED       | -20480.7              | 148.2                 |
| ID2 EXTENDED        | -24007.8              | 137.4                 |
| ID2 MISFOLDED       | -18957.1              | 140.8                 |
| ID3 EXTENDED        | -21743.6              | 139.0                 |
| ID3 MISFOLDED       | -17957.3              | 149.8                 |
|                     |                       |                       |
| <b>ff99SB OPC</b>   | <b>Average EPTOT*</b> | <b>Average DHIED*</b> |
| H1 EXTENDED         | -39642.5              | 171.0                 |
| H1 MISFOLDED        | -35971.0              | 171.1                 |
| H2 EXTENDED         | -14029.0              | 58.1                  |
| H2 MISFOLDED        | -13261.7              | 60.1                  |
| B1 EXTENDED         | -37900.0              | 162.0                 |
| B1 MISFOLDED        | -30039.4              | 162.8                 |
| B2 EXTENDED         | -25786.0              | 134.5                 |
| B2 MISFOLDED        | -28368.7              | 136.4                 |
| B3 EXTENDED         | -39629.6              | 160.8                 |
| B3 MISFOLDED        | -28127.9              | 163.6                 |
| ID1 EXTENDED        | -20304.9              | 146.8                 |
| ID1 MISFOLDED       | -26763.9              | 152.7                 |
| ID2 EXTENDED        | -30045.8              | 135.1                 |
| ID2 MISFOLDED       | -21756.8              | 142.4                 |
| ID3 EXTENDED        | -29418.7              | 136.8                 |
| ID3 MISFOLDED       | -24346.0              | 142.1                 |
|                     |                       |                       |
| <b>ff14SB TIP3P</b> | <b>Average EPTOT*</b> | <b>Average DHIED*</b> |
| H1 EXTENDED         | -40384.0              | 191.6                 |
| H1 MISFOLDED        | -27024.7              | 191.5                 |
| H2 EXTENDED         | -10100.9              | 55.8                  |
| H2 MISFOLDED        | -10244.7              | 58.2                  |
| B1 EXTENDED         | -25237.0              | 210.9                 |
| B1 MISFOLDED        | -23582.6              | 215.6                 |
| B2 EXTENDED         | -20087.7              | 163.6                 |

|                     |                       |                       |
|---------------------|-----------------------|-----------------------|
| B2 MISFOLDED        | -22518.1              | 163.5                 |
| B3 EXTENDED         | -25025.7              | 199.6                 |
| B3 MISFOLDED        | -22192.7              | 202.4                 |
| ID1 EXTENDED        | -24497.5              | 169.2                 |
| ID1 MISFOLDED       | -20454.6              | 174.7                 |
| ID2 EXTENDED        | -25311.8              | 161.4                 |
| ID2 MISFOLDED       | -18934.8              | 166.9                 |
| ID3 EXTENDED        | -24036.5              | 169.4                 |
| ID3 MISFOLDED       | -17935.0              | 173.9                 |
| <b>ff14SB OPC</b>   | <b>Average EPTOT*</b> | <b>Average DHIED*</b> |
| H1 EXTENDED         | -41568.5              | 191.2                 |
| H1 MISFOLDED        | -35941.6              | 198.5                 |
| H2 EXTENDED         | -13718.6              | 53.5                  |
| H2 MISFOLDED        | -13261.2              | 58.8                  |
| B1 EXTENDED         | -41820.8              | 192.9                 |
| B1 MISFOLDED        | -29989.0              | 216.8                 |
| B2 EXTENDED         | -28981.6              | 162.4                 |
| B2 MISFOLDED        | -28345.7              | 164.1                 |
| B3 EXTENDED         | -41820.8              | 192.9                 |
| B3 MISFOLDED        | -28091.5              | 203.0                 |
| ID1 EXTENDED        | -28280.6              | 170.2                 |
| ID1 MISFOLDED       | -26743.3              | 172.6                 |
| ID2 EXTENDED        | -31638.8              | 160.8                 |
| ID2 MISFOLDED       | -21731.1              | 167.0                 |
| ID3 EXTENDED        | -3331.1               | 159.4                 |
| ID3 MISFOLDED       | -24324.5              | 172.2                 |
| <b>ff19SB TIP3P</b> | <b>Average EPTOT*</b> | <b>Average DHIED*</b> |
| H1 EXTENDED         | -21846.2              | 93.3                  |
| H1 MISFOLDED        | -27115.7              | 95.0                  |
| H2 EXTENDED         | -95440.8              | 43.0                  |
| H2 MISFOLDED        | -10259.3              | 45.5                  |
| B1 EXTENDED         | -33799.7              | 96.9                  |
| B1 MISFOLDED        | -23683.7              | 97.1                  |
| B2 EXTENDED         | -19732.3              | 79.5                  |
| B2 MISFOLDED        | -22595.7              | 79.4                  |
| B3 EXTENDED         | -23016.5              | 88.2                  |
| B3 MISFOLDED        | -22285.6              | 90.8                  |
| ID1 EXTENDED        | -17731.1              | 74.5                  |
| ID1 MISFOLDED       | -20548.9              | 74.1                  |
| ID2 EXTENDED        | -26174.8              | 77.2                  |
| ID2 MISFOLDED       | -19015.7              | 77.6                  |
| ID3 EXTENDED        | -19476.7              | 70.7                  |
| ID3 MISFOLDED       | -18060.0              | 72.7                  |
| <b>ff19SB OPC</b>   | <b>Average EPTOT*</b> | <b>Average DHIED*</b> |
| H1 EXTENDED         | -38906.2              | 94.8                  |
| H1 MISFOLDED        | -36042.9              | 97.6                  |

|                        |                       |                       |
|------------------------|-----------------------|-----------------------|
| H2 EXTENDED            | -11618.7              | 43.5                  |
| H2 MISFOLDED           | -13272.9              | 47.0                  |
| B1 EXTENDED            | -38353.5              | 92.1                  |
| B1 MISFOLDED           | -30120.1              | 97.4                  |
| B2 EXTENDED            | -20528.5              | 81.2                  |
| B2 MISFOLDED           | -28711.7              | 81.5                  |
| B3 EXTENDED            | -29998.9              | 90.9                  |
| B3 MISFOLDED           | -28189.3              | 90.2                  |
| ID1 EXTENDED           | -19186.2              | 75.2                  |
| ID1 MISFOLDED          | -26824.6              | 74.0                  |
| ID2 EXTENDED           | -41710.2              | 78.8                  |
| ID2 MISFOLDED          | -21815.0              | 78.6                  |
| ID3 EXTENDED           | -25853.0              | 72.0                  |
| ID3 MISFOLDED          | -24403.9              | 72.7                  |
| <b>ff15ipq-m TIP3P</b> | <b>Average EPTOT*</b> | <b>Average DHIED*</b> |
| H2 EXTENDED            | -15450.5              | -47.5                 |
| <b>ff15ipq-m OPC</b>   | <b>Average EPTOT*</b> | <b>Average DHIED*</b> |
| H2 EXTENDED            | -9985.6               | -43.8                 |
| <b>ff15ipq-m SPC/E</b> | <b>Average EPTOT*</b> | <b>Average DHIED*</b> |
| H2 EXTENDED            | -17038.3              | -45.7                 |

\* values are reported in kcal/mol

**Table S2.** parameters used in aMDs simulations

| <b>ff99SB TIP3P</b> | <b>ethreshd *</b> | <b>alphad*</b> | <b>ethreshp*</b> | <b>alphap*</b> |
|---------------------|-------------------|----------------|------------------|----------------|
| H1 EXTENDED         | 239.0             | 13.6           | -22981.4         | 1235.2         |
| H1 MISFOLDED        | 240.3             | 13.6           | -25672.3         | 1377.8         |
| H2 EXTENDED         | 86.3              | 5.6            | -9561.2          | 516.8          |
| H2 MISFOLDED        | 87.9              | 5.6            | -9719.4          | 525.4          |
| B1 EXTENDED         | 237.0             | 14.4           | -28535.2         | 1509.3         |
| B1 MISFOLDED        | 240.4             | 14.4           | -22445.9         | 1186.7         |
| B2 EXTENDED         | 191.8             | 11.2           | -21372.3         | 1150.6         |
| B2 MISFOLDED        | 195.2             | 11.2           | -21389.7         | 1151.5         |
| B3 EXTENDED         | 227.1             | 13.6           | -32759.6         | 1754.9         |
| B3 MISFOLDED        | 230.8             | 13.6           | -21087.3         | 1136.6         |
| ID1 EXTENDED        | 214.4             | 12.8           | -15107.2         | 822.2          |
| ID1 MISFOLDED       | 212.2             | 12.8           | -19429.5         | 1051.2         |
| ID2 EXTENDED        | 193.4             | 11.2           | -22797.8         | 1210.1         |
| ID2 MISFOLDED       | 196.8             | 11.2           | -18000.9         | 956.2          |
| ID3 EXTENDED        | 199.0             | 12.0           | -20646.8         | 1096.8         |
| ID3 MISFOLDED       | 209.8             | 12.0           | -17054.1         | 903.2          |
| <b>ff99SB OPC</b>   | <b>ethreshd *</b> | <b>alphad*</b> | <b>ethreshp*</b> | <b>alphap*</b> |
| H1 EXTENDED         | 239.0             | 13.6           | -37555.3         | 2087.2         |
| H1 MISFOLDED        | 239.0             | 13.6           | -34075.8         | 1895.2         |
| H2 EXTENDED         | 86.1              | 5.6            | -13286.6         | 742.4          |
| H2 MISFOLDED        | 88.1              | 5.6            | -12559.0         | 702.7          |

|                     |                   |                |                  |                |
|---------------------|-------------------|----------------|------------------|----------------|
| B1 EXTENDED         | 234.0             | 14.4           | -35925.0         | 1975.0         |
| B1 MISFOLDED        | 234.8             | 14.4           | -28475.2         | 1564.2         |
| B2 EXTENDED         | 190.5             | 11.2           | -24422.0         | 1364.0         |
| B2 MISFOLDED        | 192.4             | 11.2           | -26869.7         | 1499.0         |
| B3 EXTENDED         | 228.8             | 13.6           | -37541.8         | 2087.8         |
| B3 MISFOLDED        | 231.6             | 13.6           | -26641.0         | 1486.9         |
| ID1 EXTENDED        | 210.8             | 12.8           | -19224.4         | 1080.5         |
| ID1 MISFOLDED       | 216.7             | 12.8           | -25345.5         | 1418.4         |
| ID2 EXTENDED        | 191.1             | 11.2           | -28475.0         | 1570.7         |
| ID2 MISFOLDED       | 198.4             | 11.2           | -20618.7         | 1138.1         |
| ID3 EXTENDED        | 196.8             | 12.0           | -27879.5         | 1539.2         |
| ID3 MISFOLDED       | 202.1             | 12.0           | -23074.7         | 1271.4         |
| <b>ff14SB TIP3P</b> | <b>ethreshd *</b> | <b>alphad*</b> | <b>ethreshp*</b> | <b>alphap*</b> |
| H1 EXTENDED         | 259.6             | 13.6           | -38334.2         | 2049.8         |
| H1 MISFOLDED        | 259.5             | 13.6           | -25646.9         | 1377.8         |
| H2 EXTENDED         | 83.8              | 5.6            | -9583.2          | 517.8          |
| H2 MISFOLDED        | 86.2              | 5.6            | -9719.3          | 525.4          |
| B1 EXTENDED         | 282.9             | 14.4           | -23967.3         | 1269.7         |
| B1 MISFOLDED        | 287.6             | 14.4           | -22395.9         | 1186.7         |
| B2 EXTENDED         | 219.6             | 11.2           | -19058.6         | 1029.1         |
| B2 MISFOLDED        | 219.6             | 11.2           | -21366.6         | 1151.5         |
| B3 EXTENDED         | 267.6             | 13.6           | -23746.5         | 1279.2         |
| B3 MISFOLDED        | 270.4             | 13.6           | -21056.1         | 1136.6         |
| ID1 EXTENDED        | 233.2             | 12.8           | -23242.8         | 1254.7         |
| ID1 MISFOLDED       | 238.7             | 12.8           | -19403.4         | 1051.2         |
| ID2 EXTENDED        | 217.4             | 11.2           | -24034.5         | 1277.3         |
| ID2 MISFOLDED       | 222.9             | 11.2           | -17978.6         | 956.2          |
| ID3 EXTENDED        | 229.5             | 12.0           | -22823.1         | 1213.4         |
| ID3 MISFOLDED       | 233.9             | 12.0           | -17031.8         | 903.2          |
| <b>ff14SB OPC</b>   | <b>ethreshd *</b> | <b>alphad*</b> | <b>ethreshp*</b> | <b>alphap*</b> |
| H1 EXTENDED         | 259.2             | 13.6           | -39379.5         | 2189.0         |
| H1 MISFOLDED        | 266.5             | 13.6           | -34046.4         | 1895.2         |
| H2 EXTENDED         | 84.7              | 5.6            | -11814.3         | 661.1          |
| H2 MISFOLDED        | 86.8              | 5.6            | -12558.5         | 702.7          |
| B1 EXTENDED         | 284.2             | 14.4           | -38756.7         | 2133.8         |
| B1 MISFOLDED        | 288.8             | 14.4           | -28424.8         | 1564.2         |
| B2 EXTENDED         | 218.4             | 11.2           | -27449.3         | 1532.3         |
| B2 MISFOLDED        | 220.1             | 11.2           | -26846.7         | 1499.0         |
| B3 EXTENDED         | 260.9             | 13.6           | -39616.5         | 2204.3         |
| B3 MISFOLDED        | 271.0             | 13.6           | -26604.6         | 1486.9         |
| ID1 EXTENDED        | 234.2             | 12.8           | -26782.2         | 1498.4         |
| ID1 MISFOLDED       | 236.6             | 12.8           | -25324.9         | 1418.4         |
| ID2 EXTENDED        | 216.8             | 11.2           | -29983.0         | 1655.8         |
| ID2 MISFOLDED       | 223.0             | 11.2           | -20593.0         | 1138.1         |
| ID3 EXTENDED        | 219.4             | 12.0           | -28743.3         | 1587.8         |
| ID3 MISFOLDED       | 232.2             | 12.0           | -23053.2         | 1271.4         |

| <b>ff19SB TIP3P</b>    | <b>ethreshd *</b> | <b>alphad*</b> | <b>ethreshp*</b> | <b>alphap*</b> |
|------------------------|-------------------|----------------|------------------|----------------|
| H1 EXTENDED            | 161.3             | 13.6           | -20733.9         | 1112.3         |
| H1 MISFOLDED           | 163.0             | 13.6           | -25737.9         | 1377.8         |
| H2 EXTENDED            | 71.0              | 5.6            | -9055.1          | 489.0          |
| H2 MISFOLDED           | 73.5              | 5.6            | -9733.9          | 525.4          |
| B1 EXTENDED            | 168.9             | 14.4           | -32104.1         | 1695.5         |
| B1 MISFOLDED           | 169.1             | 14.4           | -22497.0         | 1186.7         |
| B2 EXTENDED            | 135.5             | 11.2           | -18724.8         | 1007.5         |
| B2 MISFOLDED           | 135.4             | 11.2           | -21444.2         | 1151.5         |
| B3 EXTENDED            | 156.2             | 13.6           | -21842.9         | 1173.6         |
| B3 MISFOLDED           | 158.7             | 13.6           | -21149.0         | 1136.6         |
| ID1 EXTENDED           | 138.5             | 12.8           | -16821.5         | 909.6          |
| ID1 MISFOLDED          | 138.1             | 12.8           | -19497.7         | 1051.2         |
| ID2 EXTENDED           | 133.2             | 11.2           | -24858.1         | 1316.6         |
| ID2 MISFOLDED          | 133.6             | 11.2           | -18059.5         | 956.2          |
| ID3 EXTENDED           | 130.8             | 12.0           | -18497.0         | 979.7          |
| ID3 MISFOLDED          | 132.7             | 12.0           | -17154.8         | 905.1          |
| <b>ff19SB OPC</b>      | <b>ethreshd *</b> | <b>alphad*</b> | <b>ethreshp*</b> | <b>alphap*</b> |
| H1 EXTENDED            | 162.8             | 13.6           | -36861.2         | 2045.0         |
| H1 MISFOLDED           | 165.6             | 13.6           | -34147.7         | 1895.2         |
| H2 EXTENDED            | 71.5              | 5.6            | -11003.0         | 615.7          |
| H2 MISFOLDED           | 75.0              | 5.6            | -12570.2         | 702.7          |
| B1 EXTENDED            | 164.1             | 14.4           | -36357.3         | 1996.2         |
| B1 MISFOLDED           | 169.4             | 14.4           | -28555.9         | 1564.2         |
| B2 EXTENDED            | 137.2             | 11.2           | -19441.6         | 1086.9         |
| B2 MISFOLDED           | 137.5             | 11.2           | -27197.3         | 1514.4         |
| B3 EXTENDED            | 158.9             | 13.6           | -28417.3         | 1581.6         |
| B3 MISFOLDED           | 158.2             | 13.6           | -26702.4         | 1486.9         |
| ID1 EXTENDED           | 139.2             | 12.8           | -18167.1         | 1019.0         |
| ID1 MISFOLDED          | 138.0             | 12.8           | -25406.8         | 1417.8         |
| ID2 EXTENDED           | 134.8             | 11.2           | -39532.1         | 2178.1         |
| ID2 MISFOLDED          | 134.6             | 11.2           | -20676.9         | 1138.1         |
| ID3 EXTENDED           | 131.9             | 12.0           | -24503.2         | 1349.8         |
| ID3 MISFOLDED          | 132.7             | 12.0           | -23133.2         | 1270.7         |
| <b>ff15ipq-m TIP3P</b> | <b>ethreshd *</b> | <b>alphad*</b> | <b>ethreshp*</b> | <b>alphap*</b> |
| H2 EXTENDED            | -19.5             | 5.6            | -14669.2         | 781.3          |
| <b>ff15ipq-m OPC</b>   | <b>ethreshd *</b> | <b>alphad*</b> | <b>ethreshp*</b> | <b>alphap*</b> |
| H2 EXTENDED            | -15.8             | 5.6            | -9204.3          | 781.3          |
| <b>ff15ipq-m SPC/E</b> | <b>ethreshd *</b> | <b>alphad*</b> | <b>ethreshp*</b> | <b>alphap*</b> |
| H2 EXTENDED            | -17.7             | 5.6            | -16257.0         | 781.3          |

\* values are reported in kcal/mol



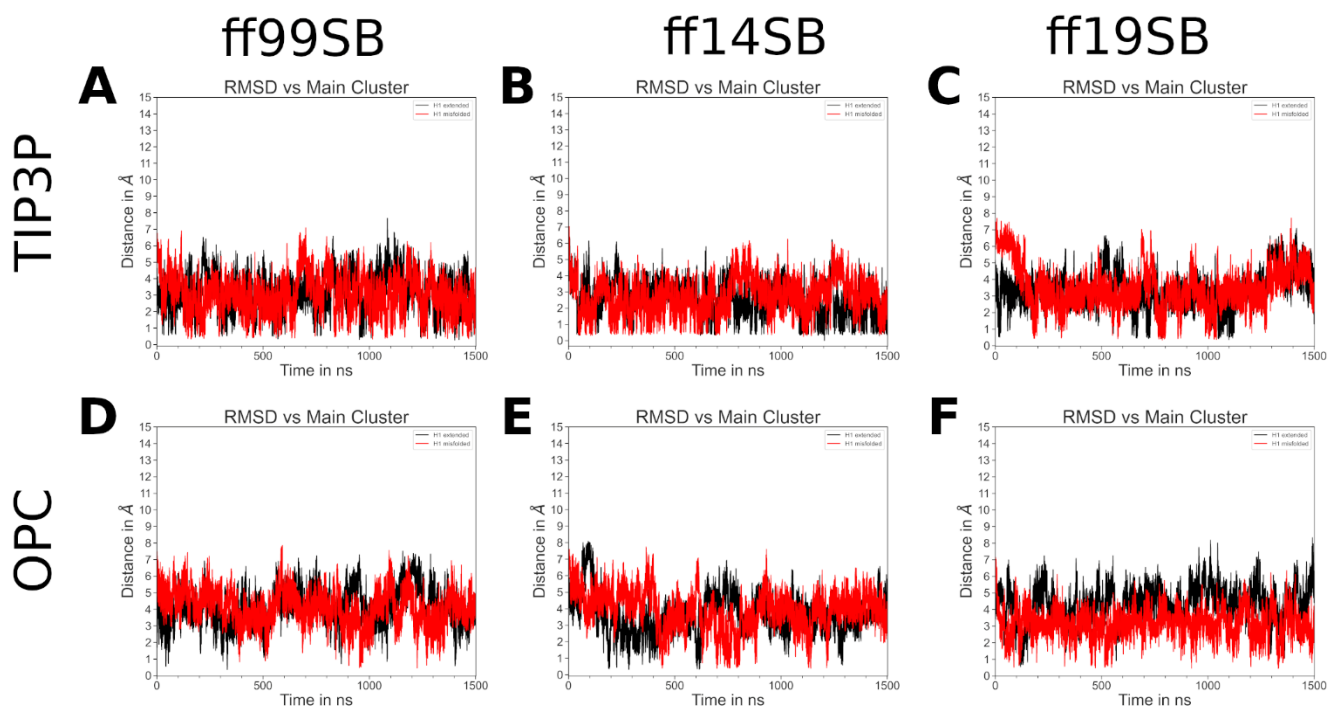

**Figure S1.** RMSD of H1 for extended (black) and misfolded (red) aMDs. The main cluster obtained from the last 500 ns of ff14SB/TIP3P simulation starting from extended conformation was used as the reference.

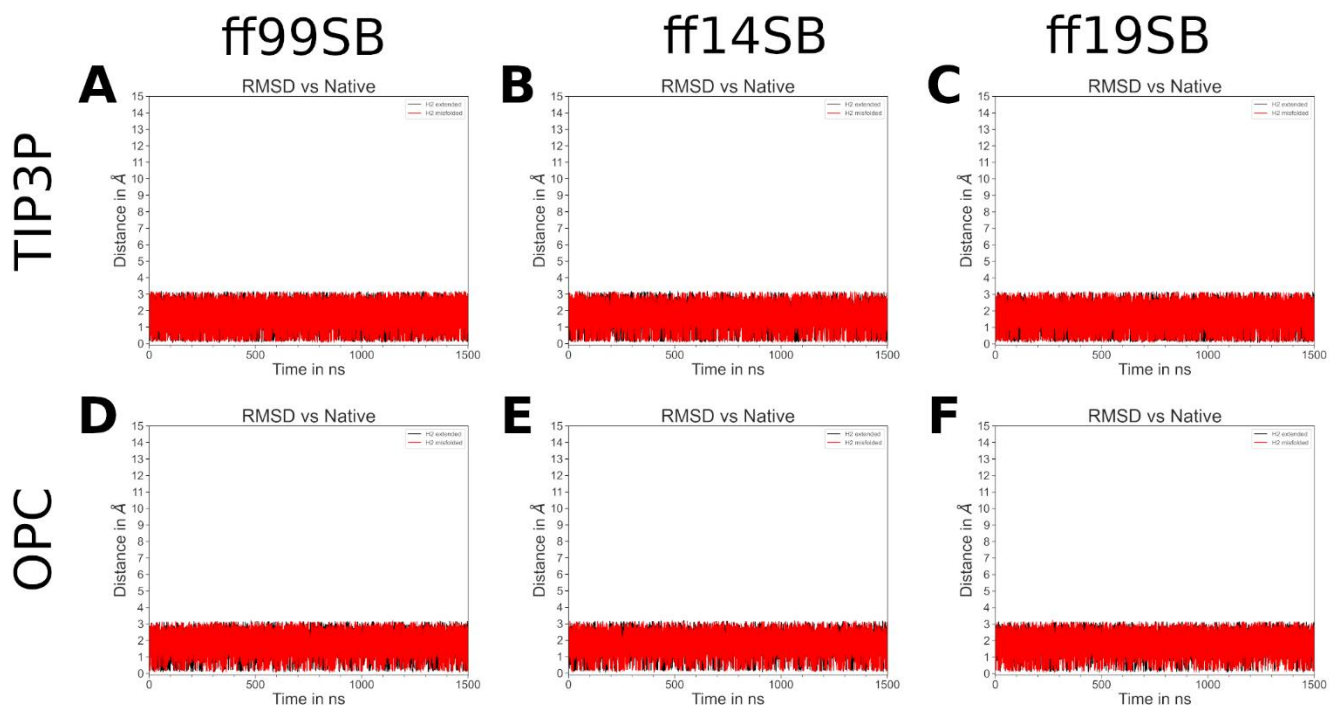

**Figure S2.** RMSD of H2 for extended (black) and misfolded (red) aMDs. The native structure was used as the reference.

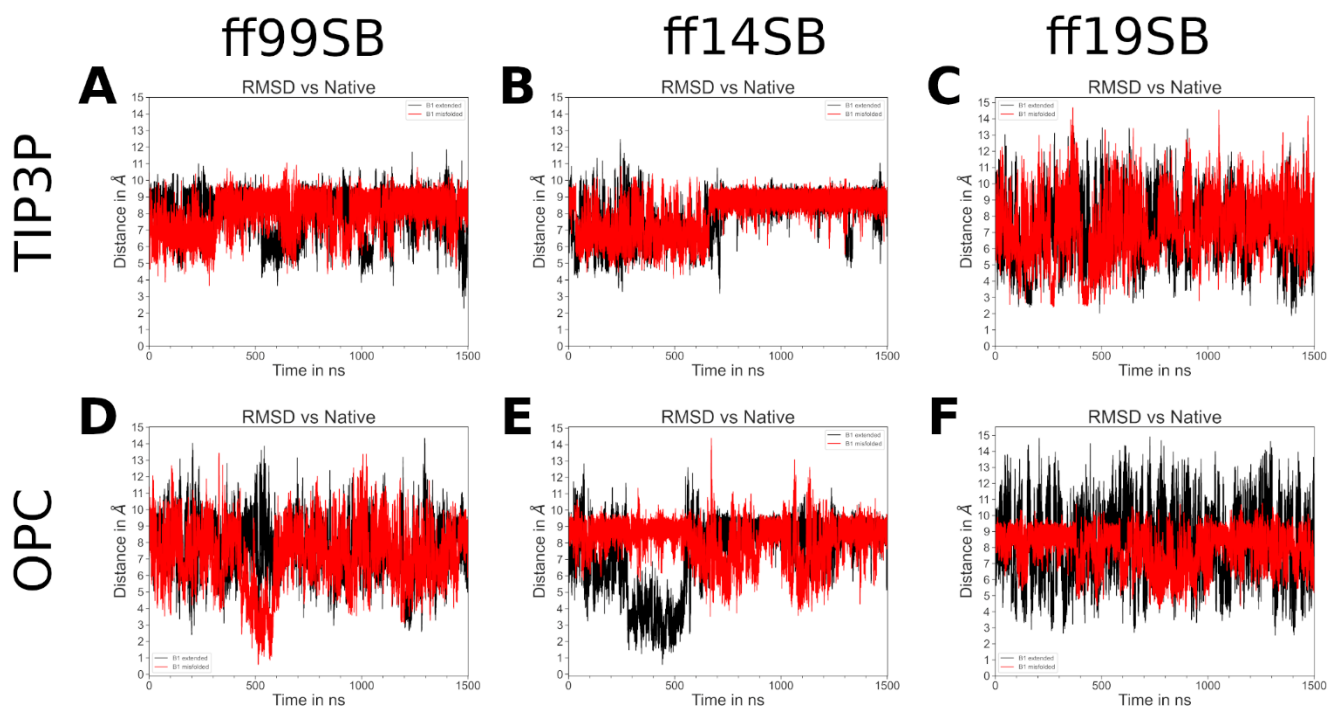

**Figure S3.** RMSD of B1 for extended (black) and misfolded (red) aMDs. The native structure was used as the reference.

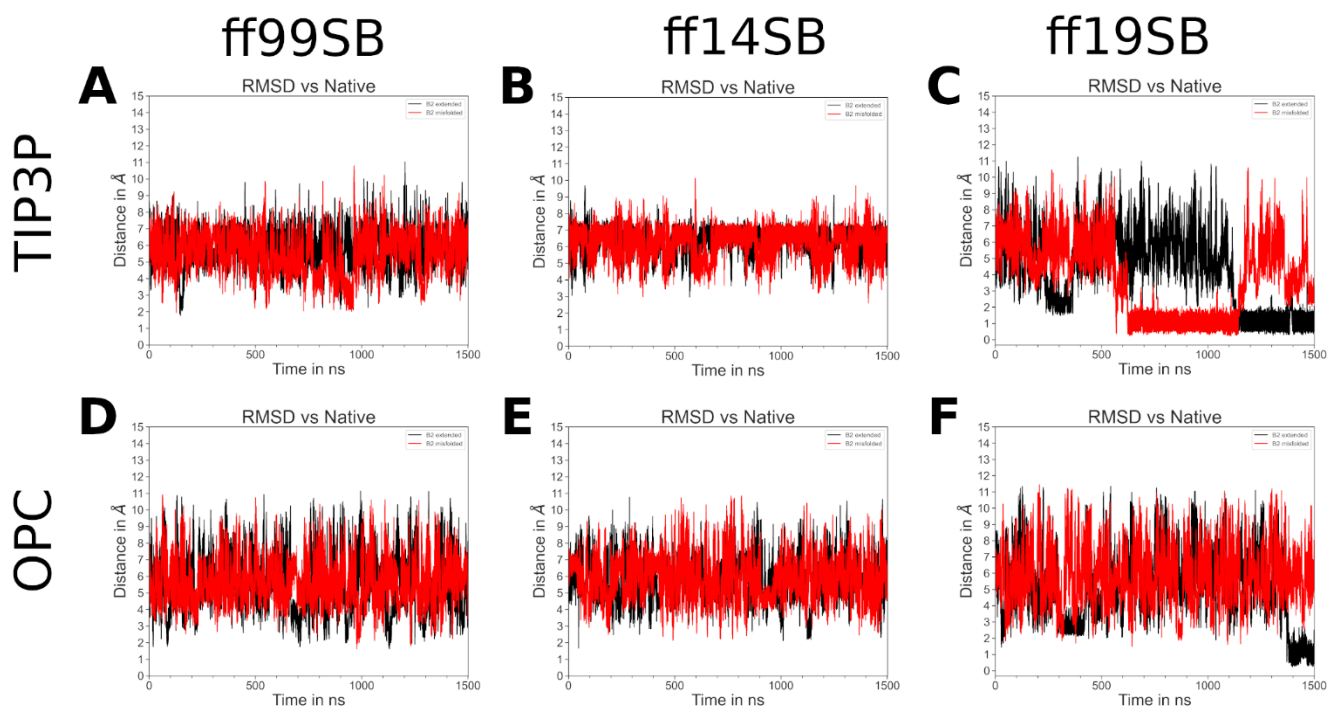

**Figure S4.** RMSD of B2 for extended (black) and misfolded (red) aMDs. The native structure was used as the reference.

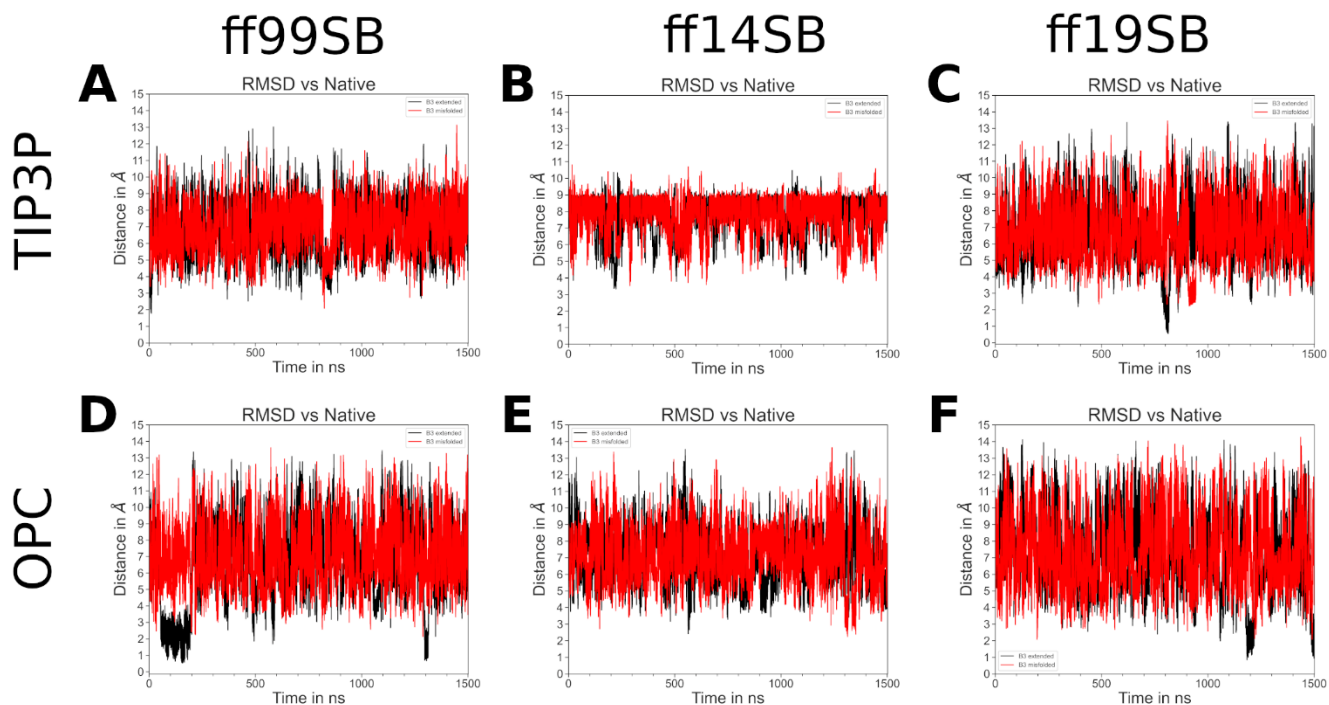

**Figure S5.** RMSD of B3 for extended (black) and misfolded (red) aMDs. The native structure was used as the reference.

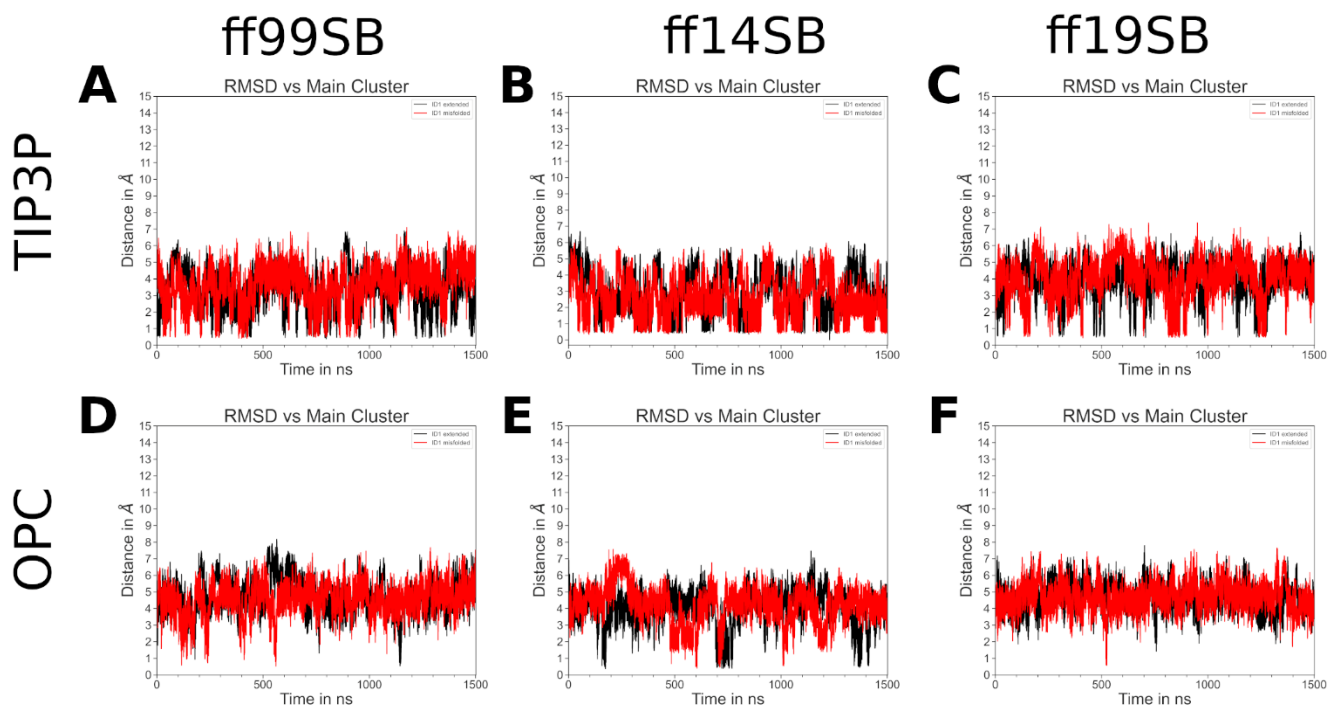

**Figure S6.** RMSD of ID1 for extended (black) and misfolded (red) aMDs. The main cluster obtained from the last 500 ns of the extended ff14SB/TIP3P simulation was used as the reference.

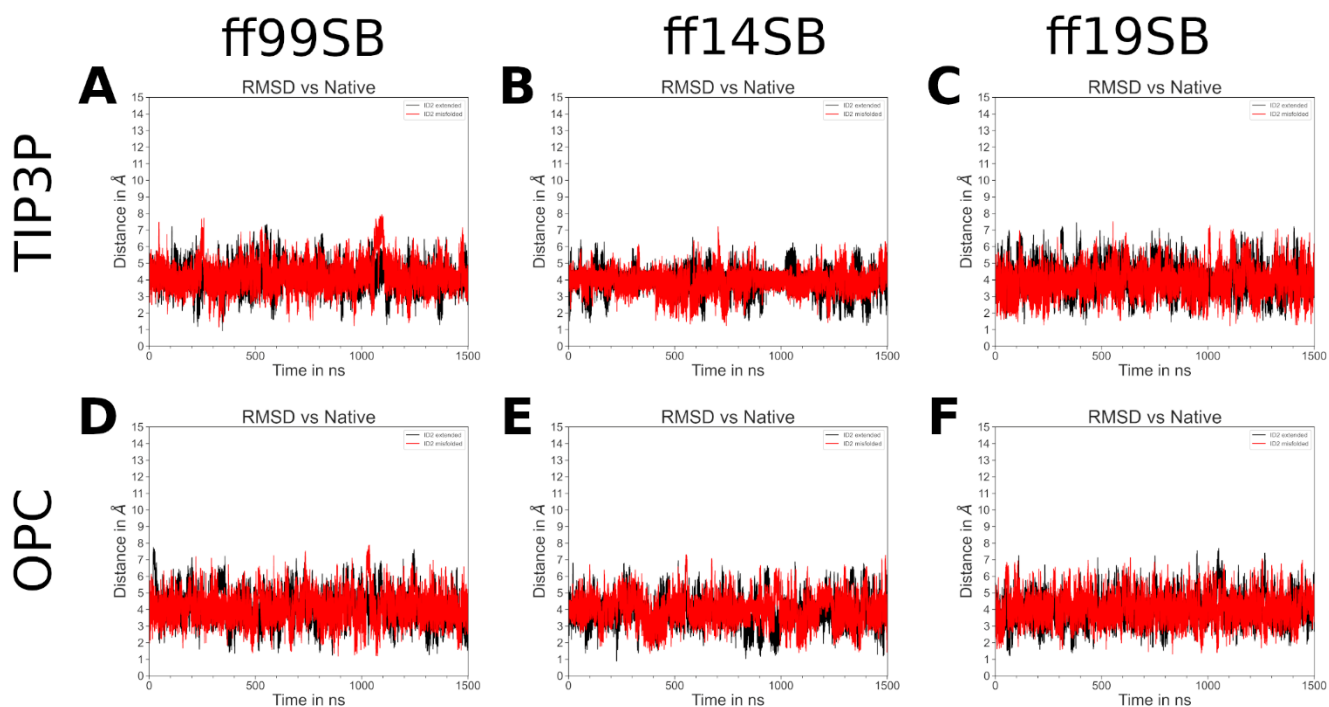

**Figure S7.** RMSD of ID2 for extended (black) and misfolded (red) aMD. The native structure was used as the reference.

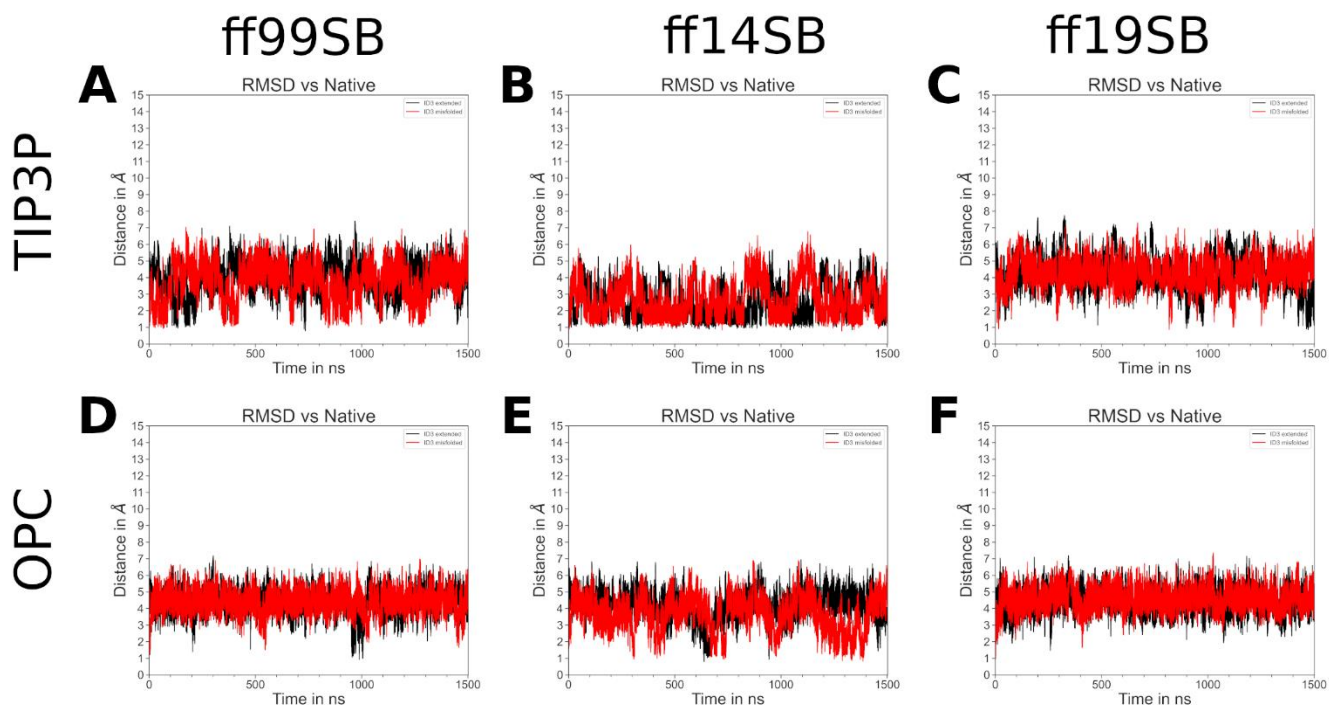

**Figure S8.** RMSD of ID3 for extended (black) and misfolded (red) aMDs. The native structure was used as the reference.

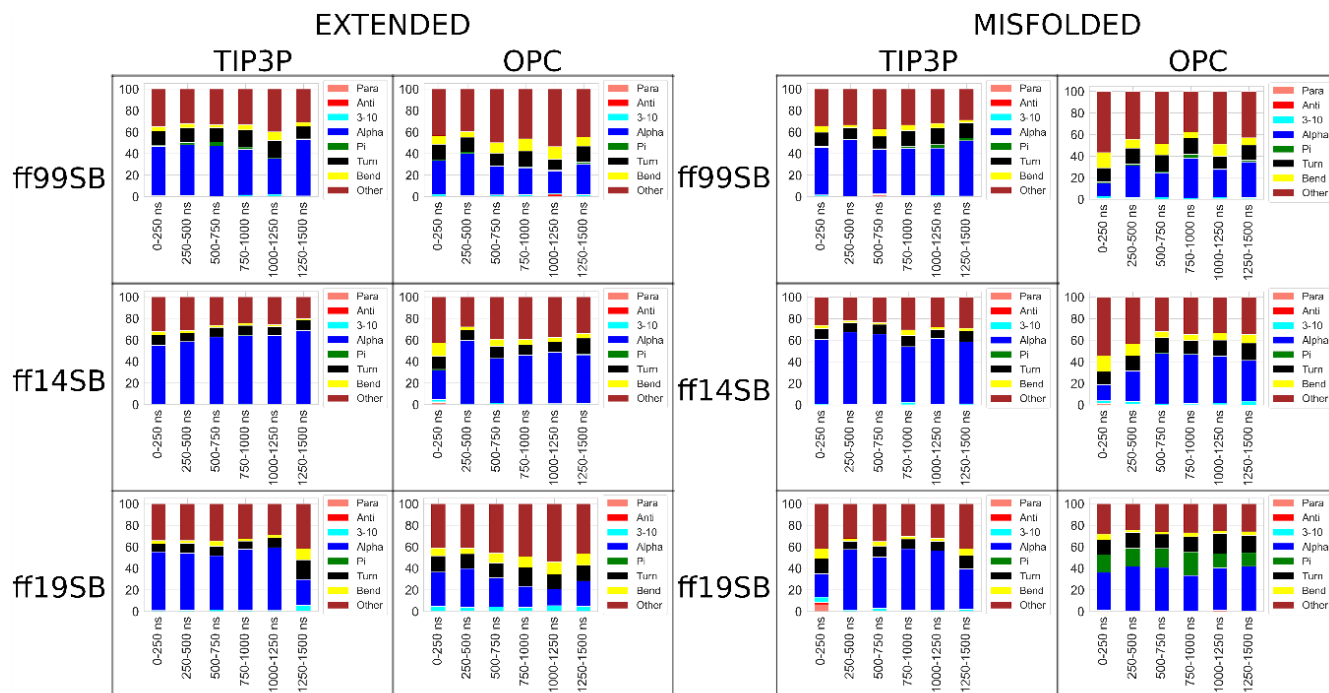

Figure S9. H1 DSSP for extended (left) and misfolded (right) aMDs, calculated at 250 ns intervals.

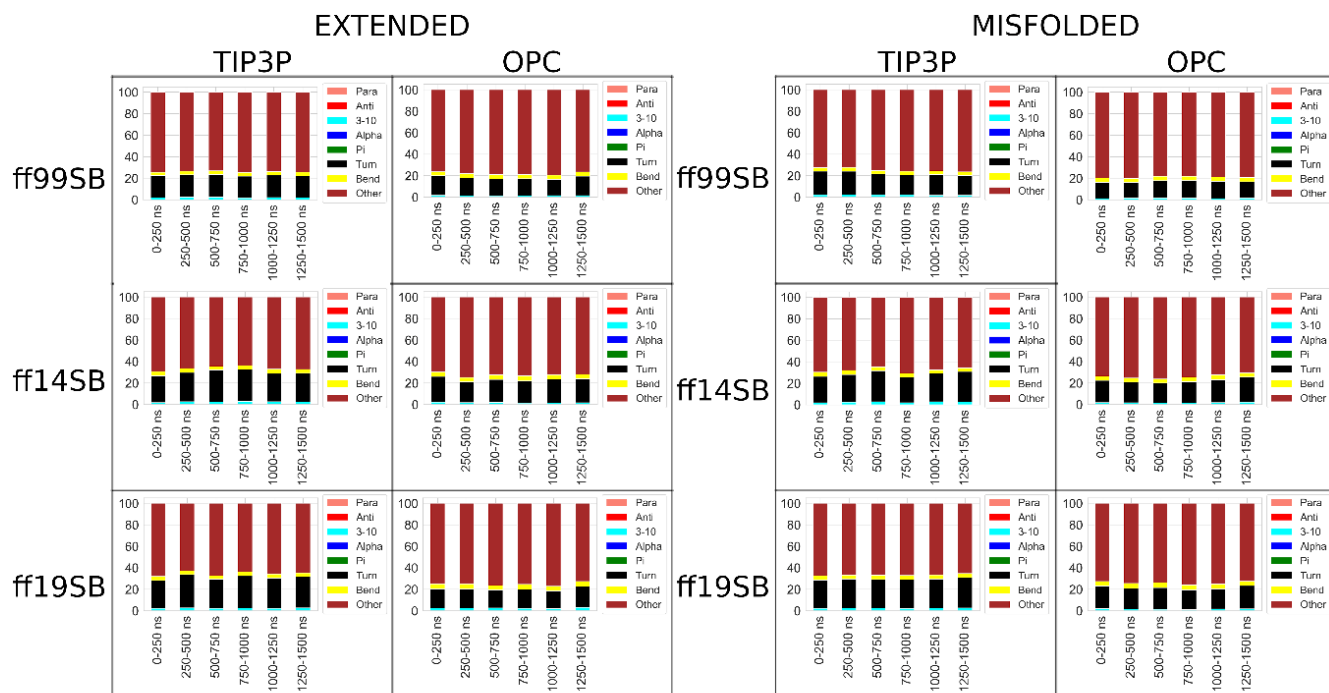

Figure S10. H2 DSSP for extended (left) and misfolded (right) aMDs, calculated at 250 ns intervals.

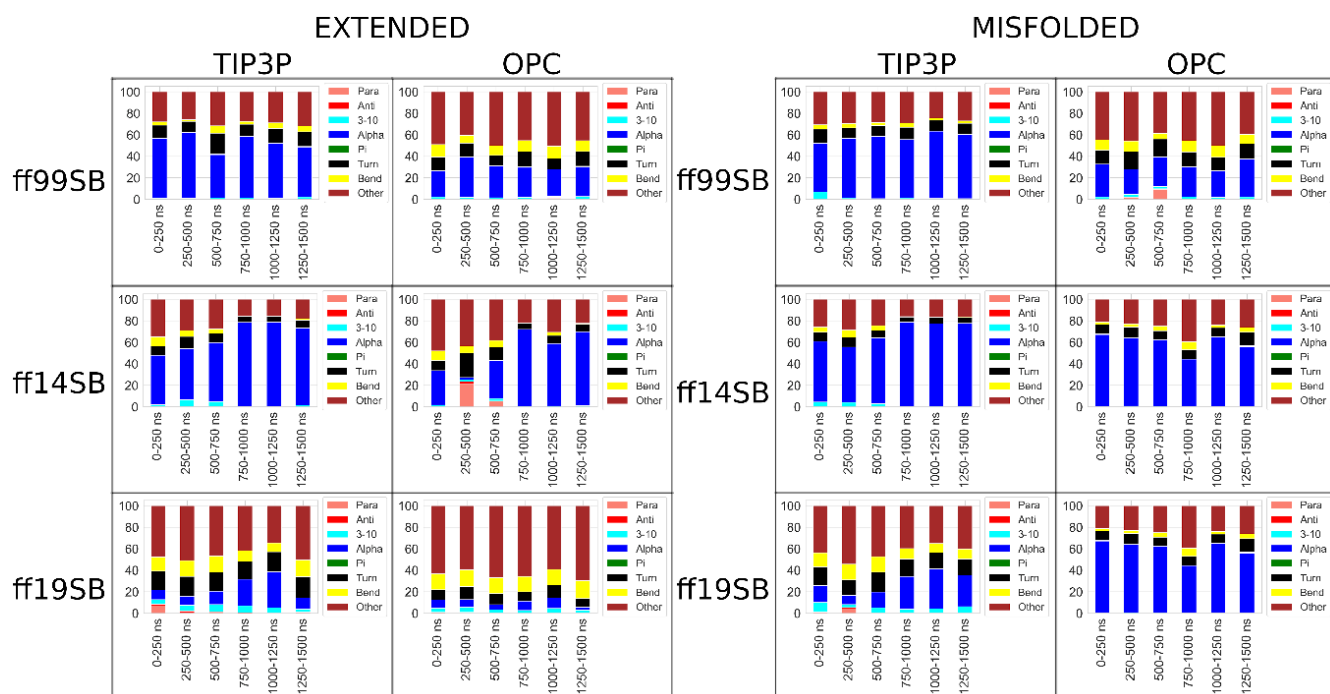

Figure S11. B1 DSSP for extended (left) and misfolded (right) aMDs, calculated at 250 ns intervals.

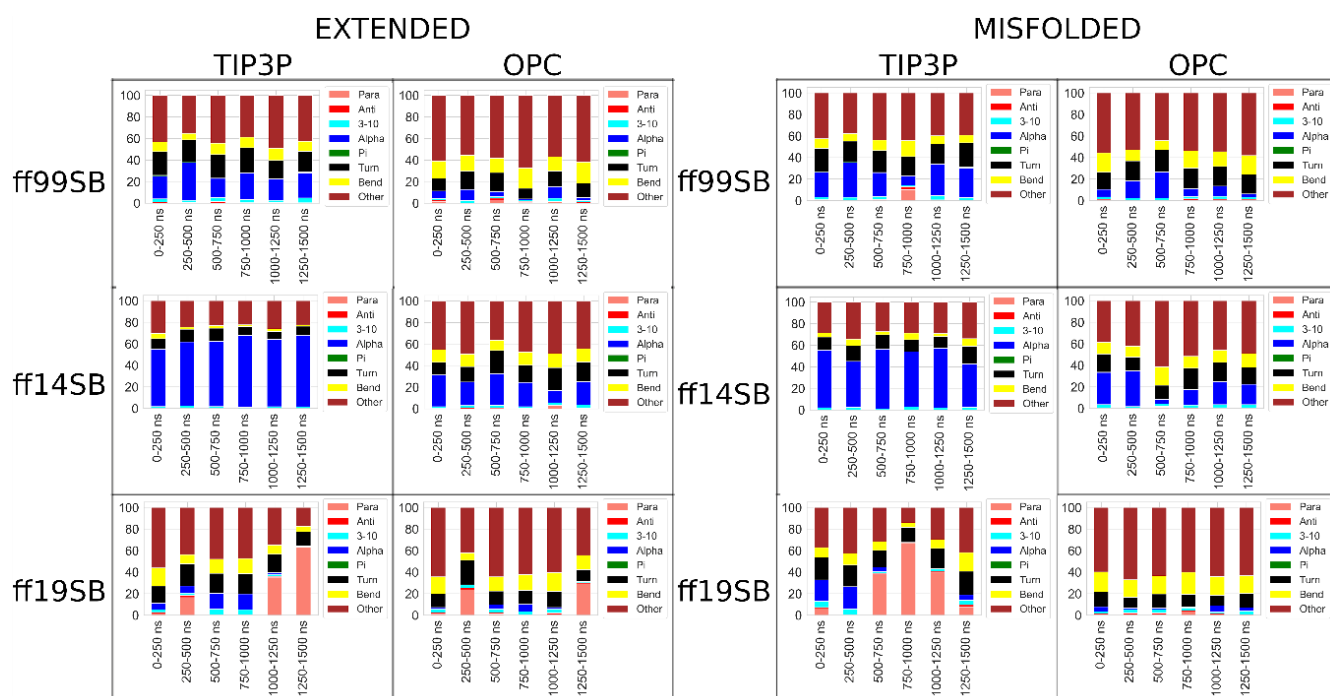

Figure S12. B2 DSSP for extended (left) and misfolded (right) aMDs, calculated at 250 ns intervals.

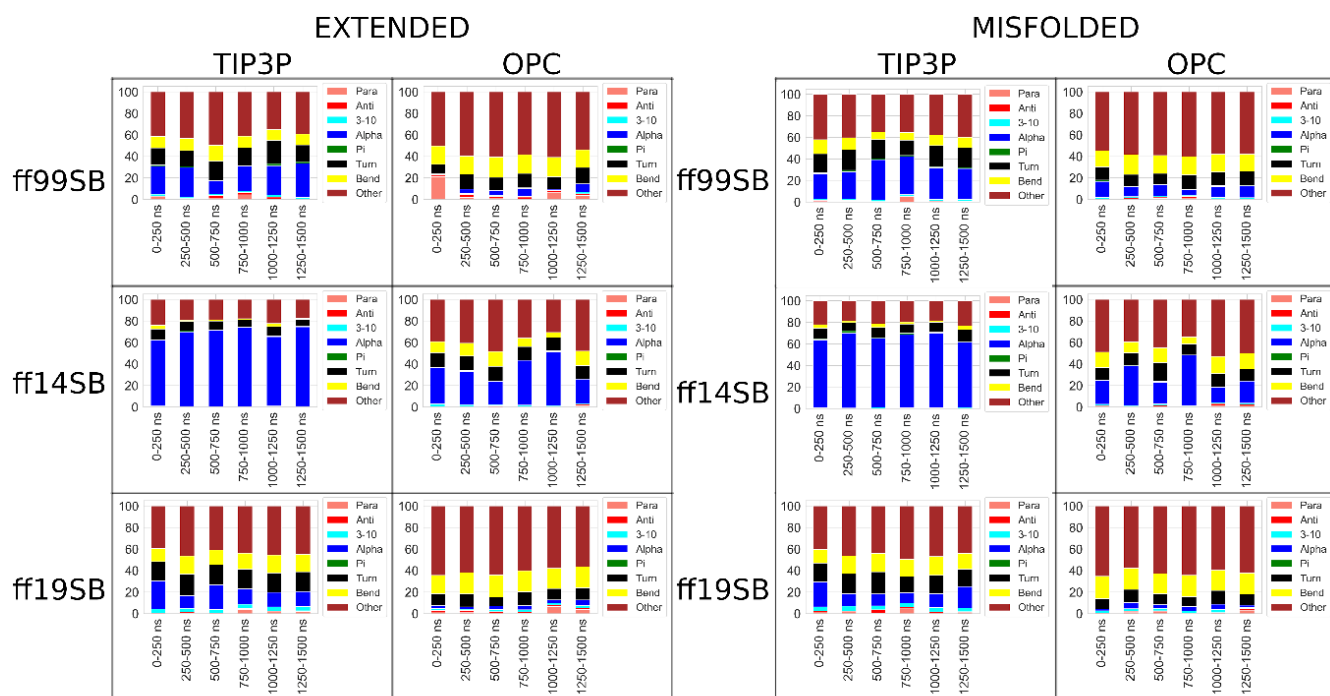

Figure S13. B3 DSSP for extended (left) and misfolded (right) aMDs, calculated at 250 ns intervals.

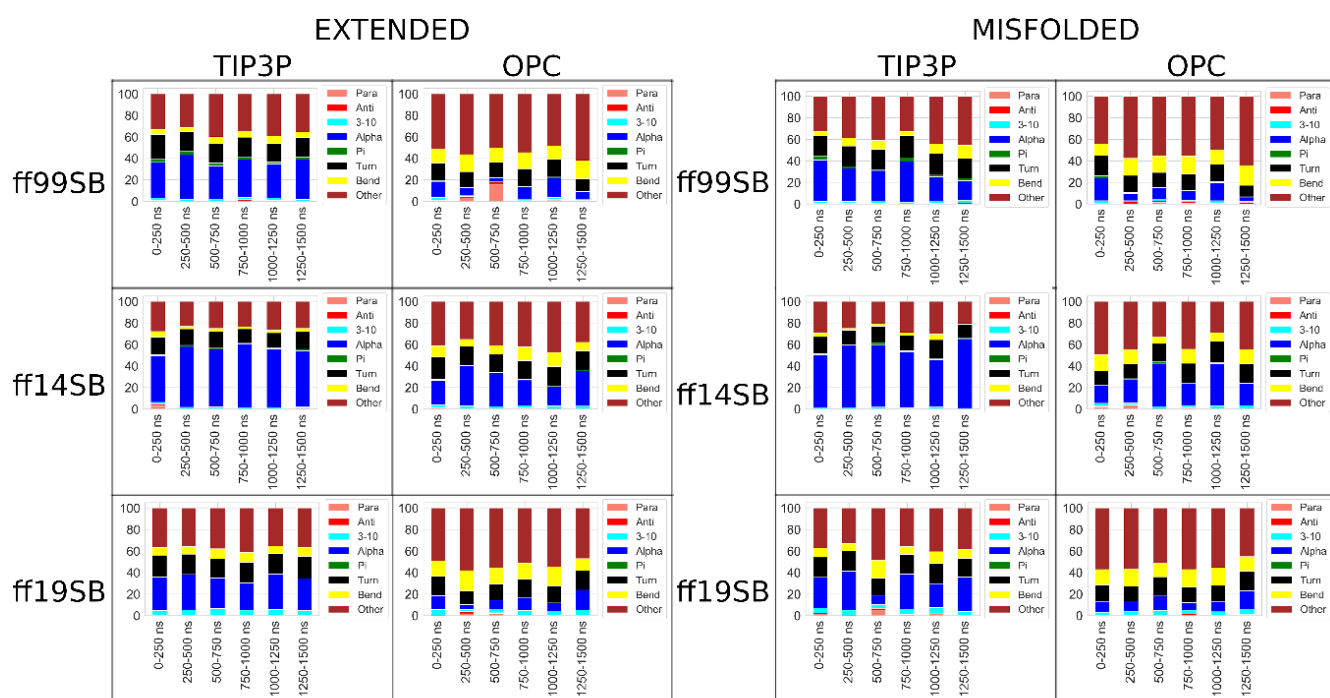

Figure S14. ID1 DSSP for extended (left) and misfolded (right) aMDs, calculated at 250 ns intervals.

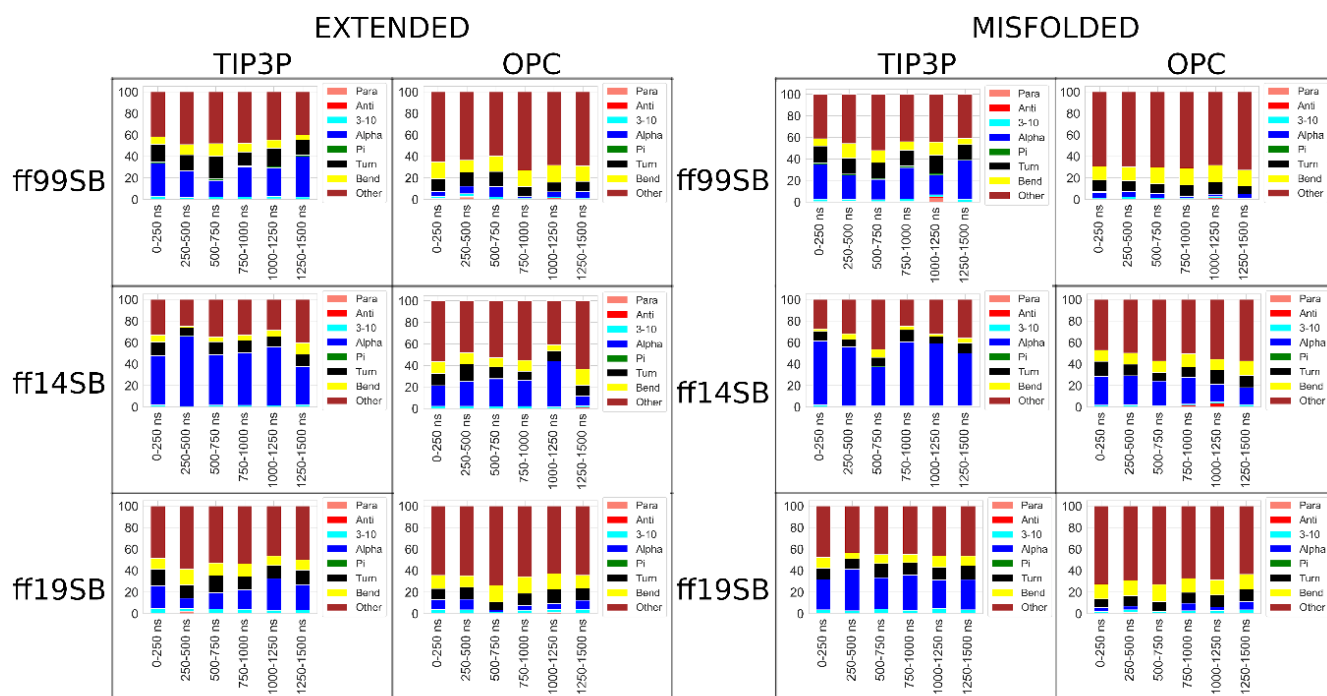

Figure S15. ID2 DSSP for extended (left) and misfolded (right) aMDs, calculated at 250 ns intervals.

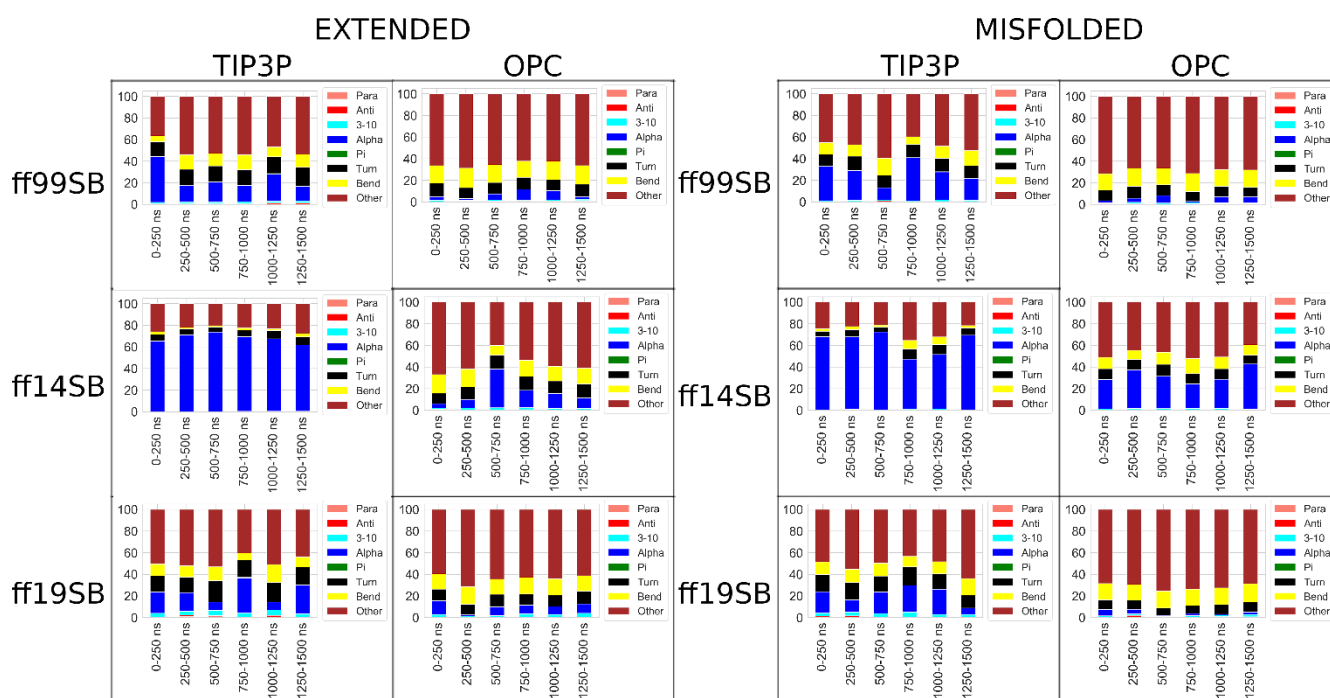

Figure S16. ID3 DSSP for extended (left) and misfolded (right) aMDs, calculated at 250 ns intervals.



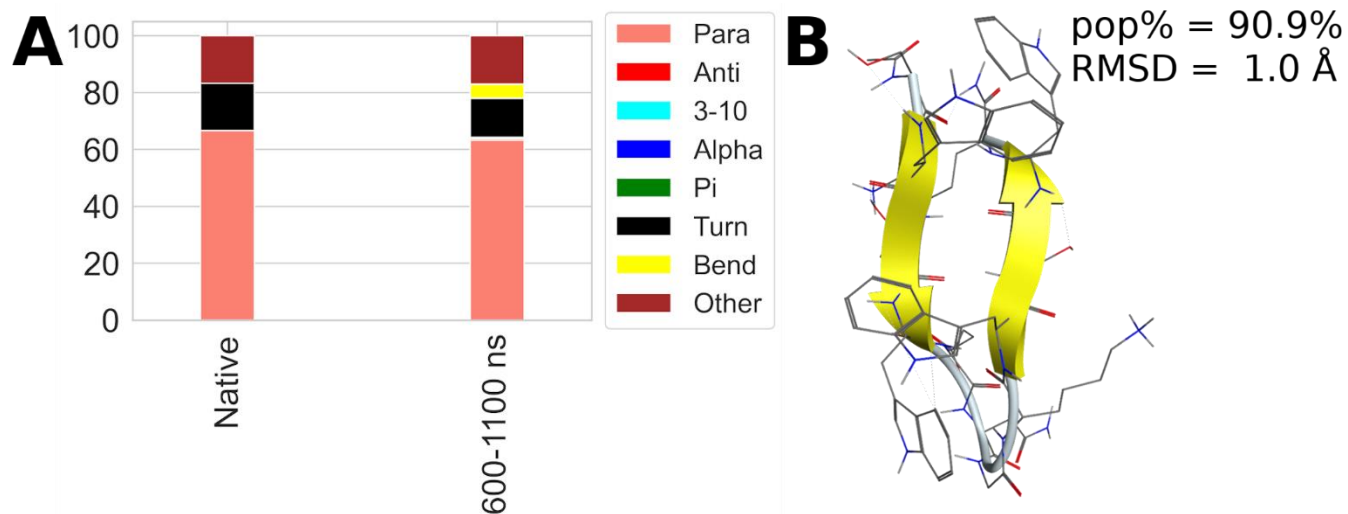

**Figure S17.** DSSP and main cluster of ff19SB/TIP3P B2 simulation starting from misfolded conformation. The 600 – 1100 ns time interval was considered for the analysis. Population (pop%) and RMSD compared to native structure are also shown.

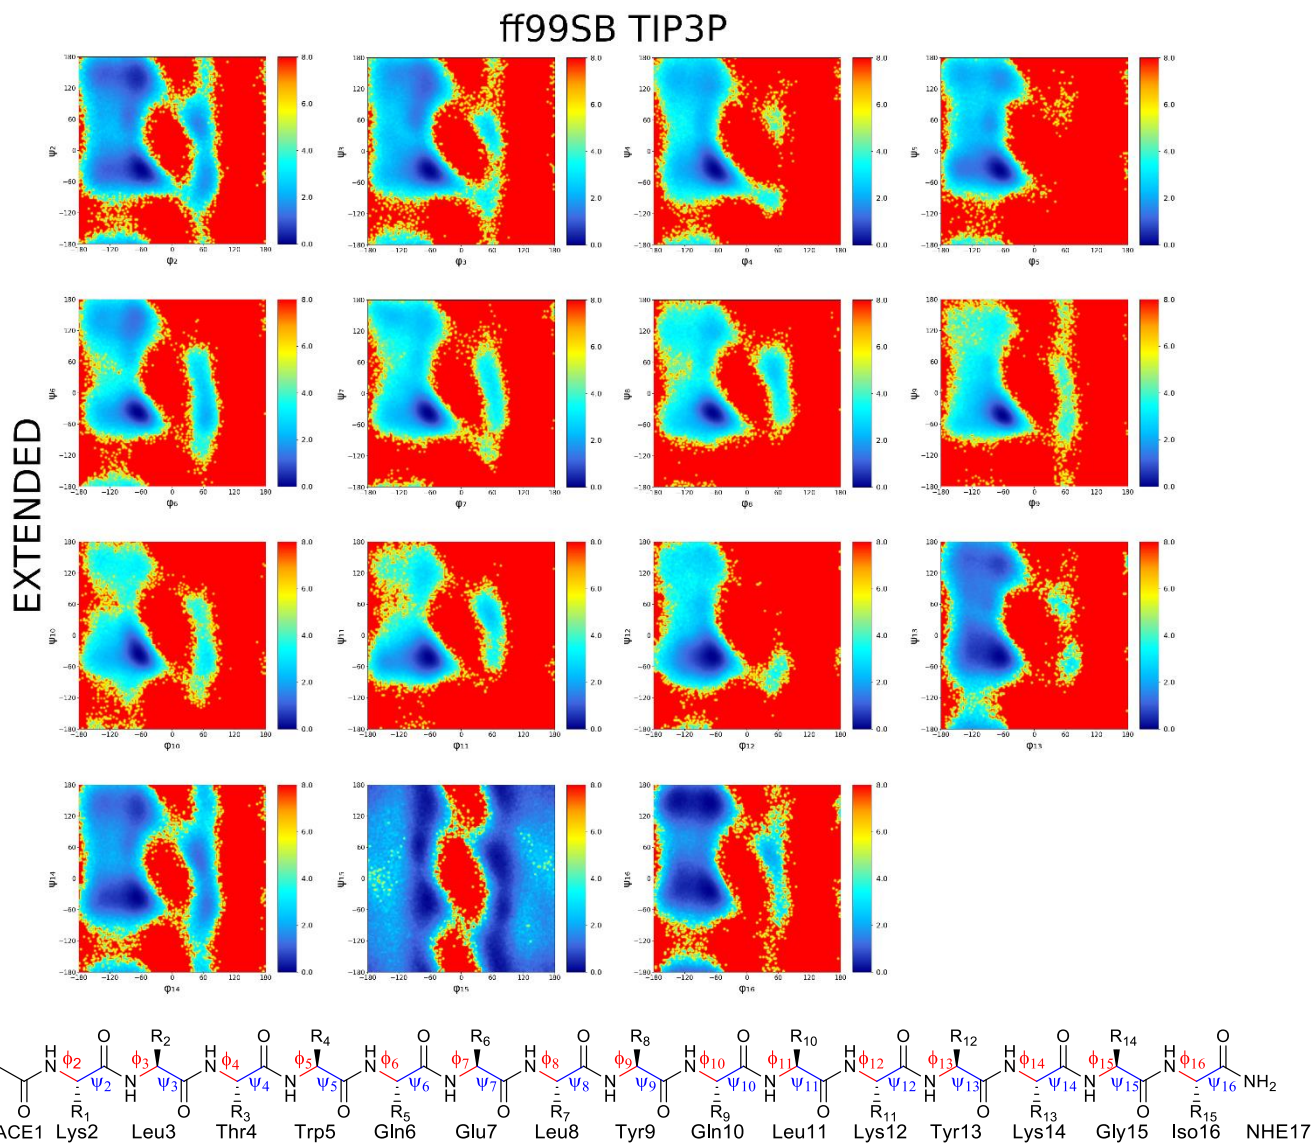

**Figure S18.** PMFs obtained from  $\varphi$  and  $\psi$  dihedral distributions of H1 residues for the ff99SB/TIP3P combination from an extended conformation. PMFs are shown as heat maps (0.0 – 8.0 kcal/mol range) from dark blue to red. H1 sequence and representation of  $\varphi$  and  $\psi$  angles numbering are also shown.

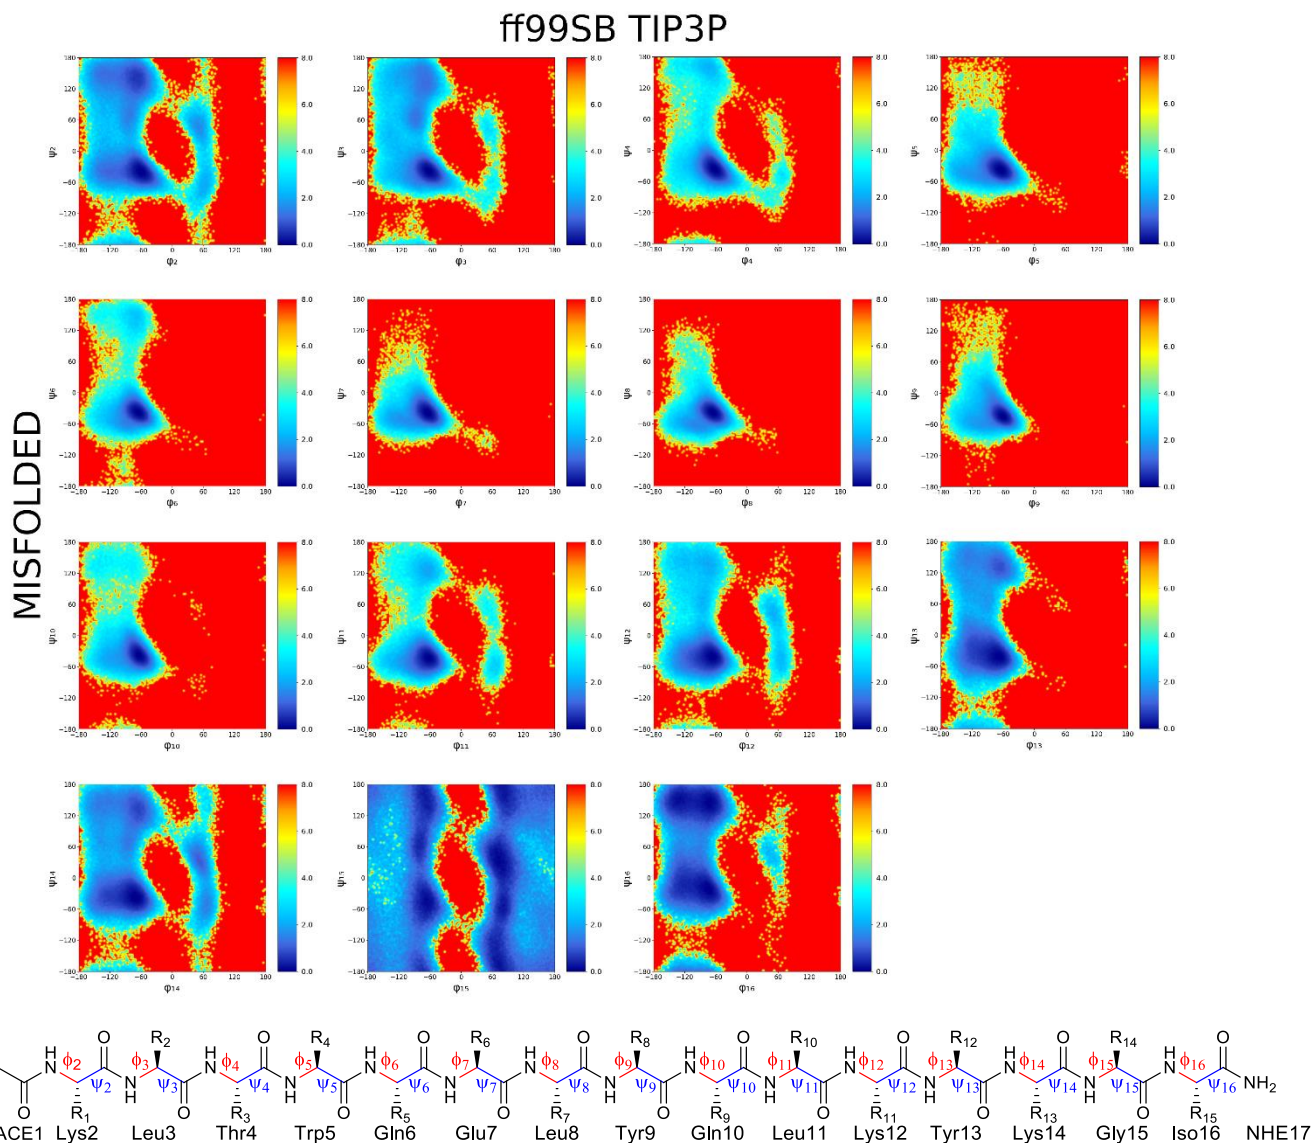

**Figure S19.** PMFs obtained from  $\phi$  and  $\psi$  dihedral distributions of H1 residues for the ff99SB/TIP3P combination from a misfolded conformation. PMFs are shown as heat maps (0.0 – 8.0 kcal/mol range) from dark blue to red. H1 sequence and representation of  $\phi$  and  $\psi$  angles numbering are also shown.

## ff99SB OPC

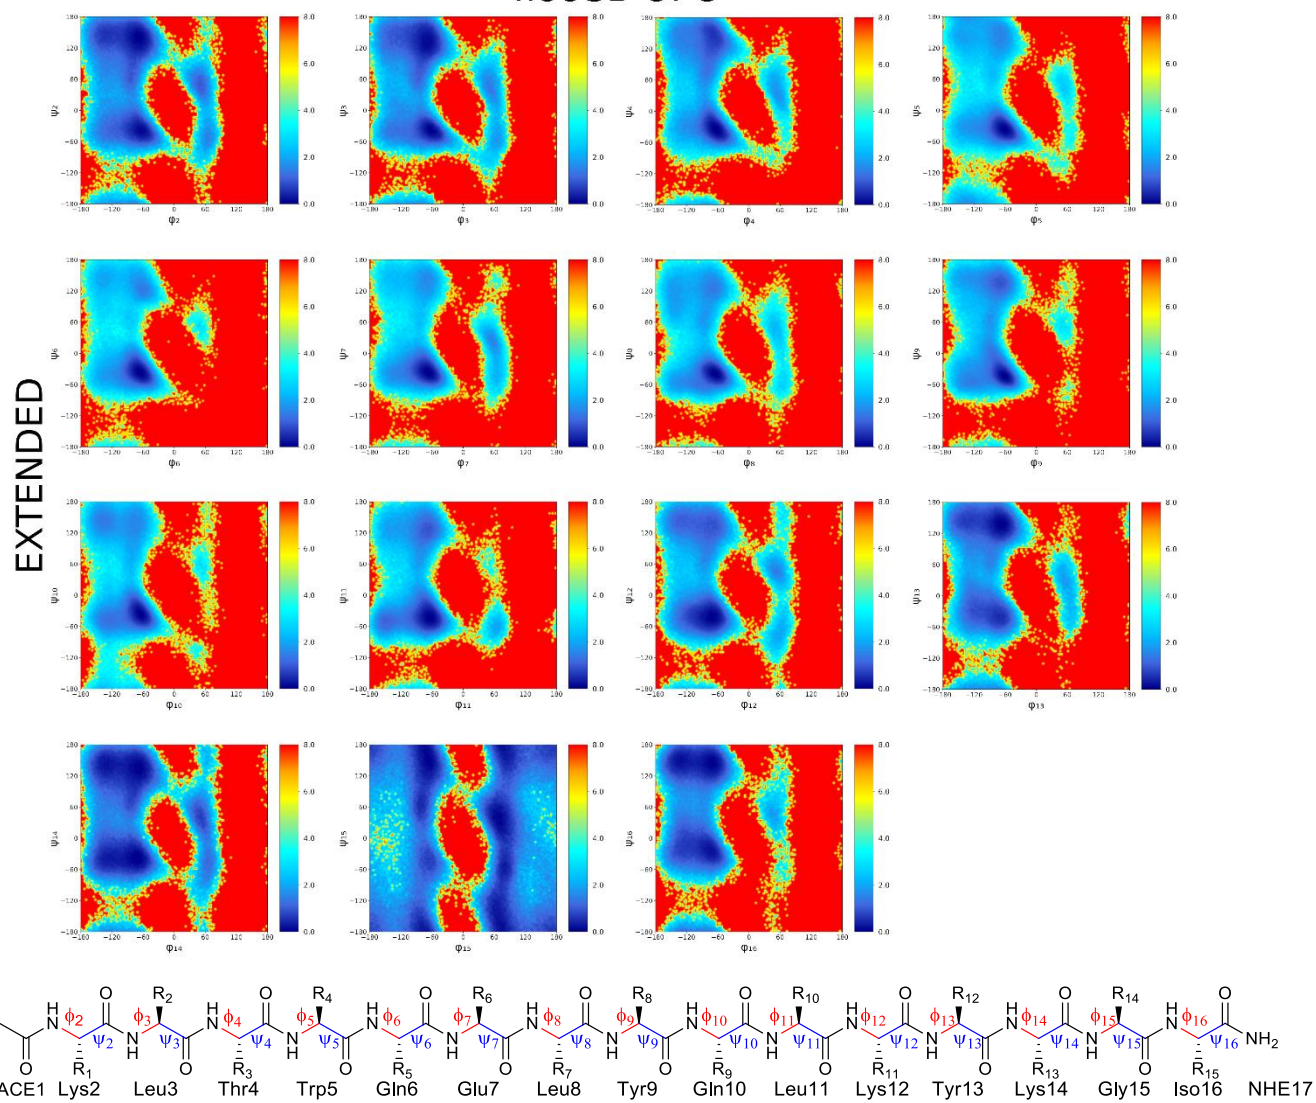

**Figure S20.** PMFs obtained from  $\phi$  and  $\psi$  dihedral distributions of H1 residues for the ff99SB/OPC combination from an extended conformation. PMFs are shown as heat maps (0.0 – 8.0 kcal/mol range) from dark blue to red. H1 sequence and representation of  $\phi$  and  $\psi$  angles numbering are also shown.

### ff99SB OPC

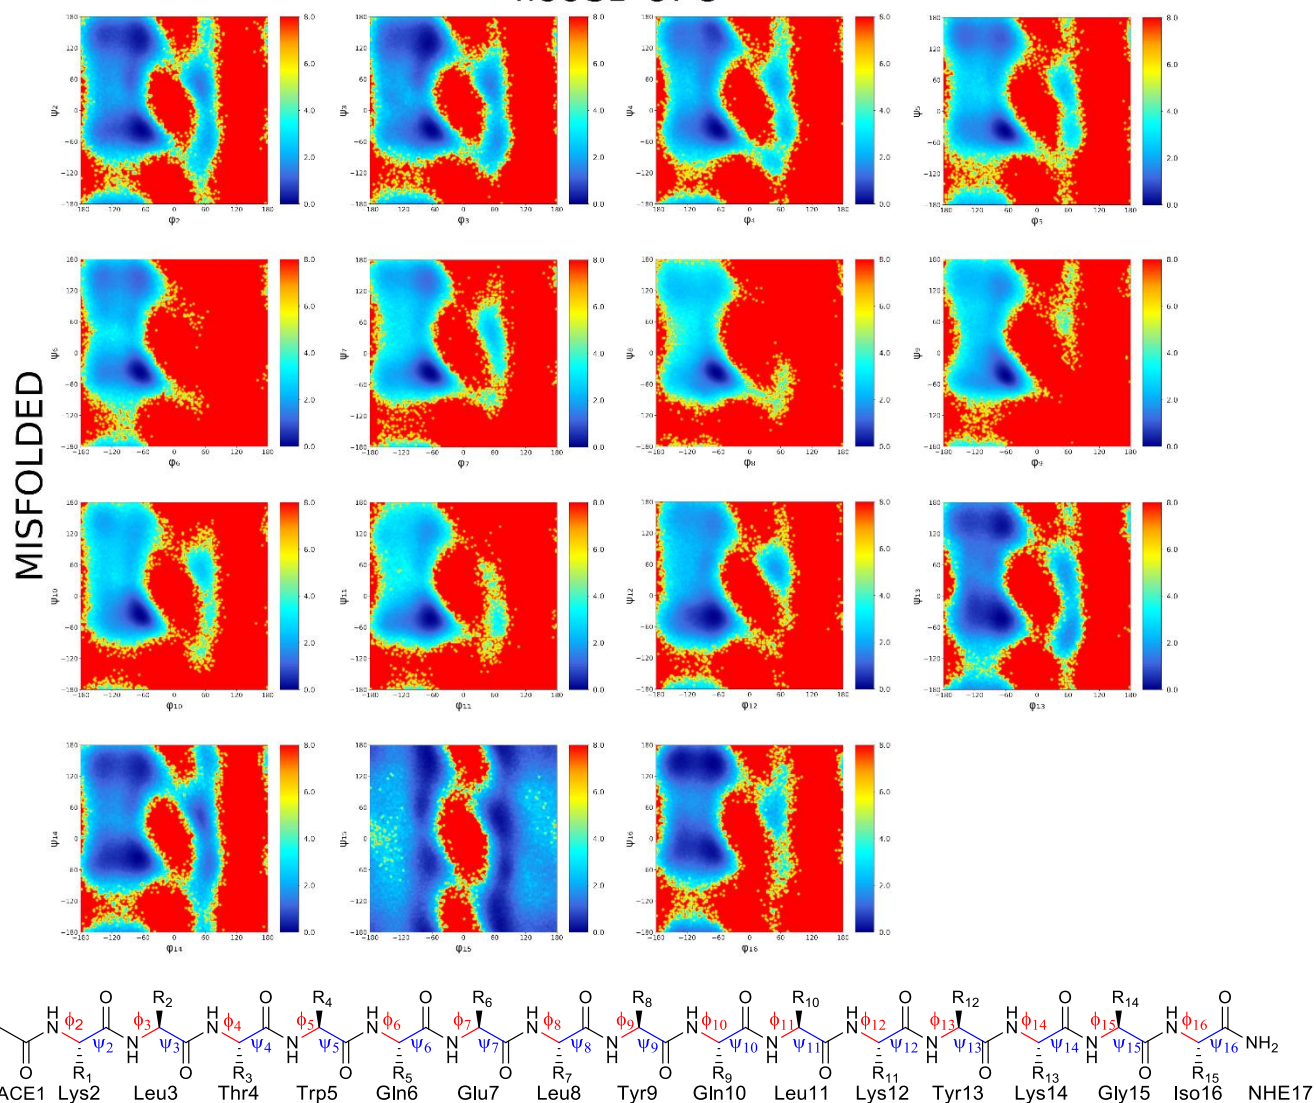

**Figure S21.** PMFs obtained from  $\phi$  and  $\psi$  dihedral distributions of H1 residues for the ff99SB/OPC combination from a misfolded conformation. PMFs are shown as heat maps (0.0 – 8.0 kcal/mol range) from dark blue to red. H1 sequence and representation of  $\phi$  and  $\psi$  angles numbering are also shown.

## ff14SB TIP3P

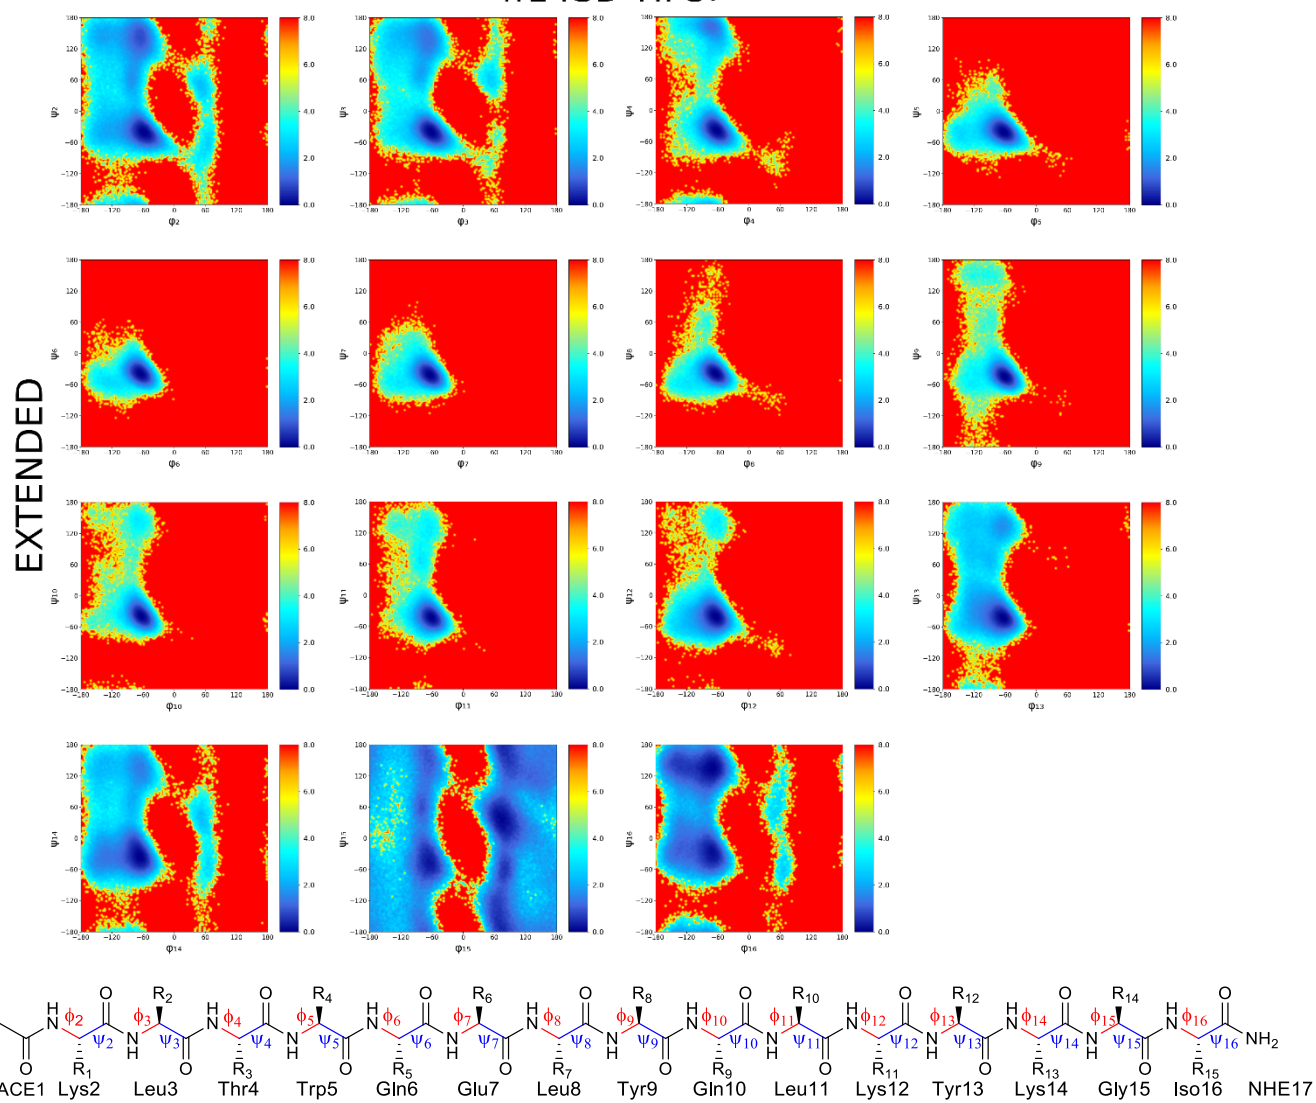

**Figure S22.** PMFs obtained from  $\phi$  and  $\psi$  dihedral distributions of H1 residues for the ff14SB/TIP3P combination from an extended conformation. PMFs are shown as heat maps (0.0 – 8.0 kcal/mol range) from dark blue to red. H1 sequence and representation of  $\phi$  and  $\psi$  angles numbering are also shown.

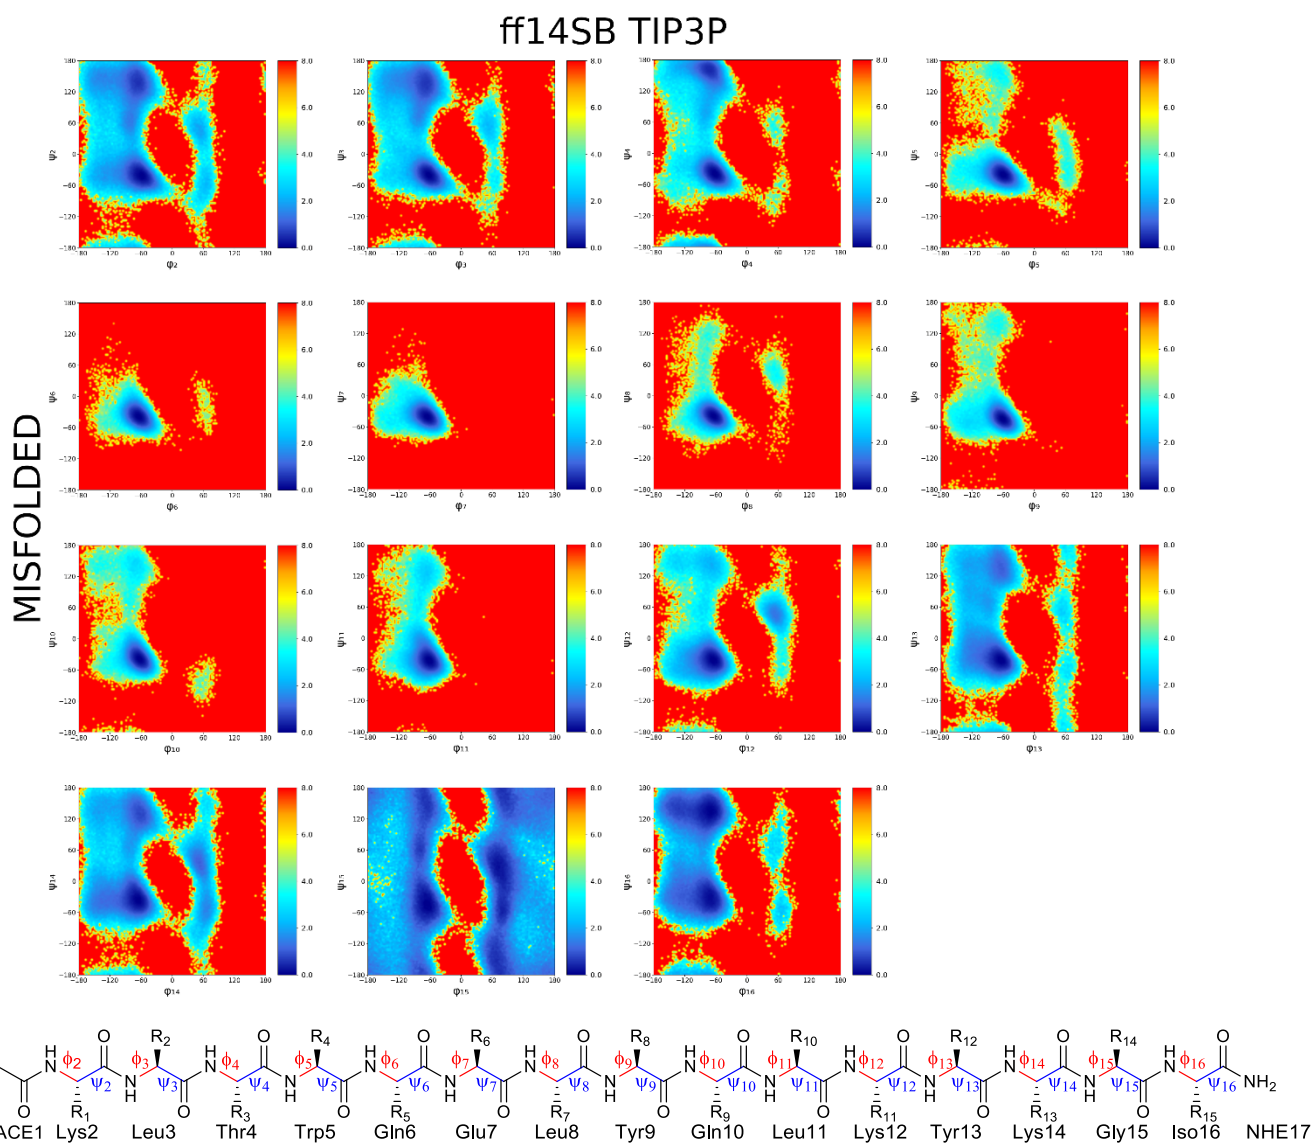

**Figure S23.** PMFs obtained from  $\phi$  and  $\psi$  dihedral distributions of H1 residues for the ff14SB/TIP3P combination from a misfolded conformation. PMFs are shown as heat maps (0.0 – 8.0 kcal/mol range) from dark blue to red. H1 sequence and representation of  $\phi$  and  $\psi$  angles numbering are also shown.

## ff14SB OPC

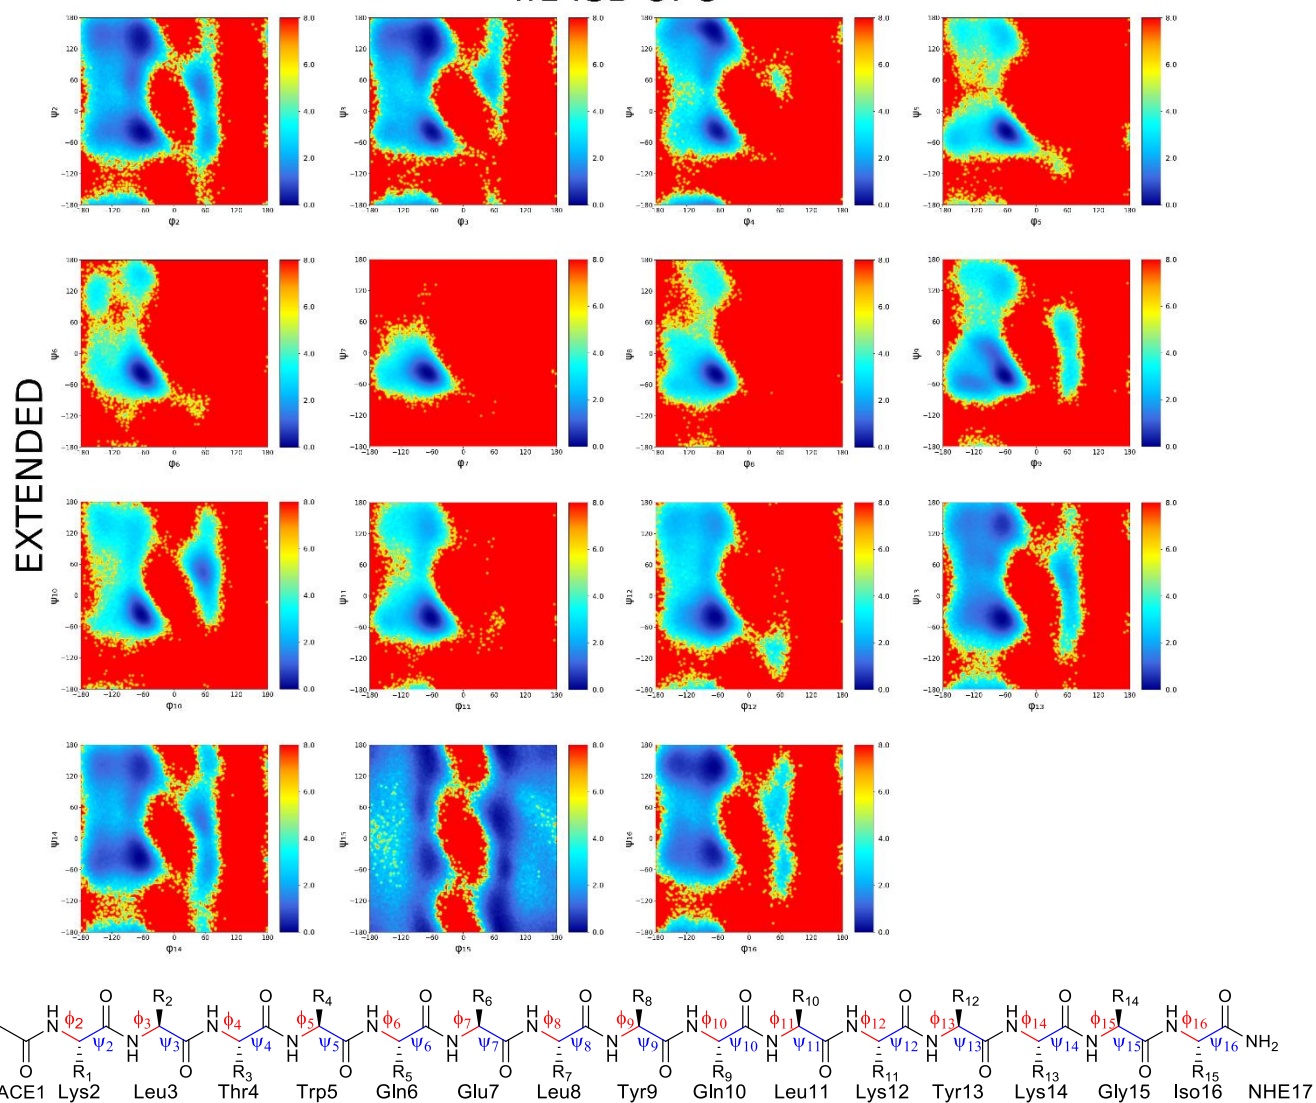

**Figure S24.** PMFs obtained from  $\phi$  and  $\psi$  dihedral distributions of H1 residues for the ff14SB/OPC combination from an extended conformation. PMFs are shown as heat maps (0.0 – 8.0 kcal/mol range) from dark blue to red. H1 sequence and representation of  $\phi$  and  $\psi$  angles numbering are also shown.



### ff14SB OPC

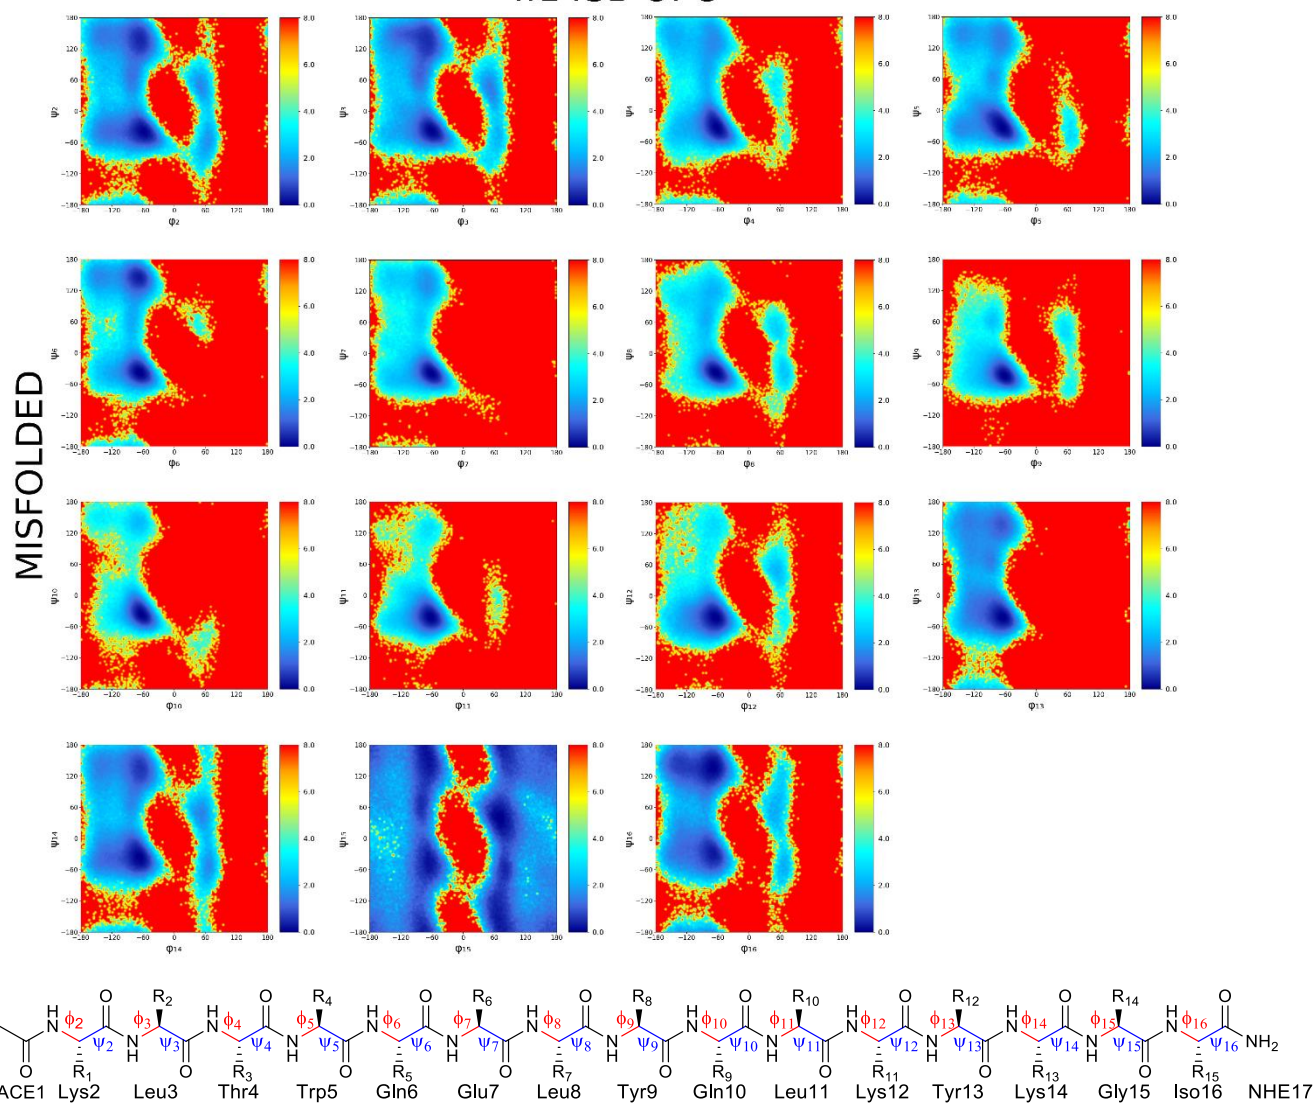

**Figure S25.** PMFs obtained from  $\phi$  and  $\psi$  dihedral distributions of H1 residues for the ff14SB/OPC combination from a misfolded conformation. PMFs are shown as heat maps (0.0 – 8.0 kcal/mol range) from dark blue to red. H1 sequence and representation of  $\phi$  and  $\psi$  angles numbering are also shown.

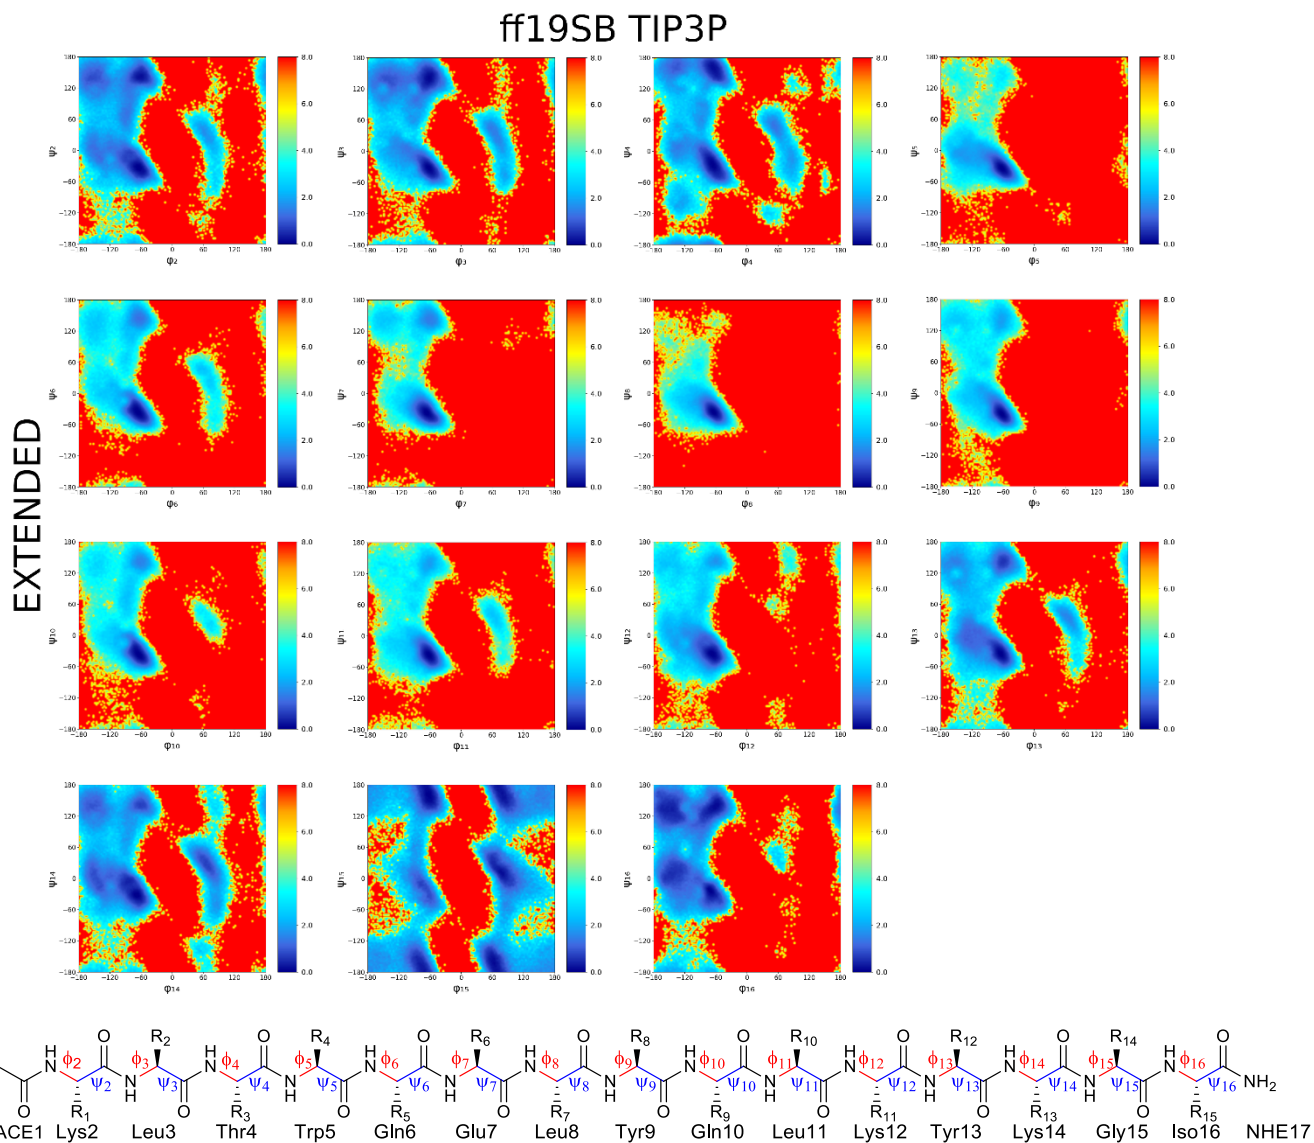

**Figure S26.** PMFs obtained from  $\phi$  and  $\psi$  dihedral distributions of H1 residues for the ff19SB/TIP3P combination from an extended conformation. PMFs are shown as heat maps (0.0 – 8.0 kcal/mol range) from dark blue to red. H1 sequence and representation of  $\phi$  and  $\psi$  angles numbering are also shown.

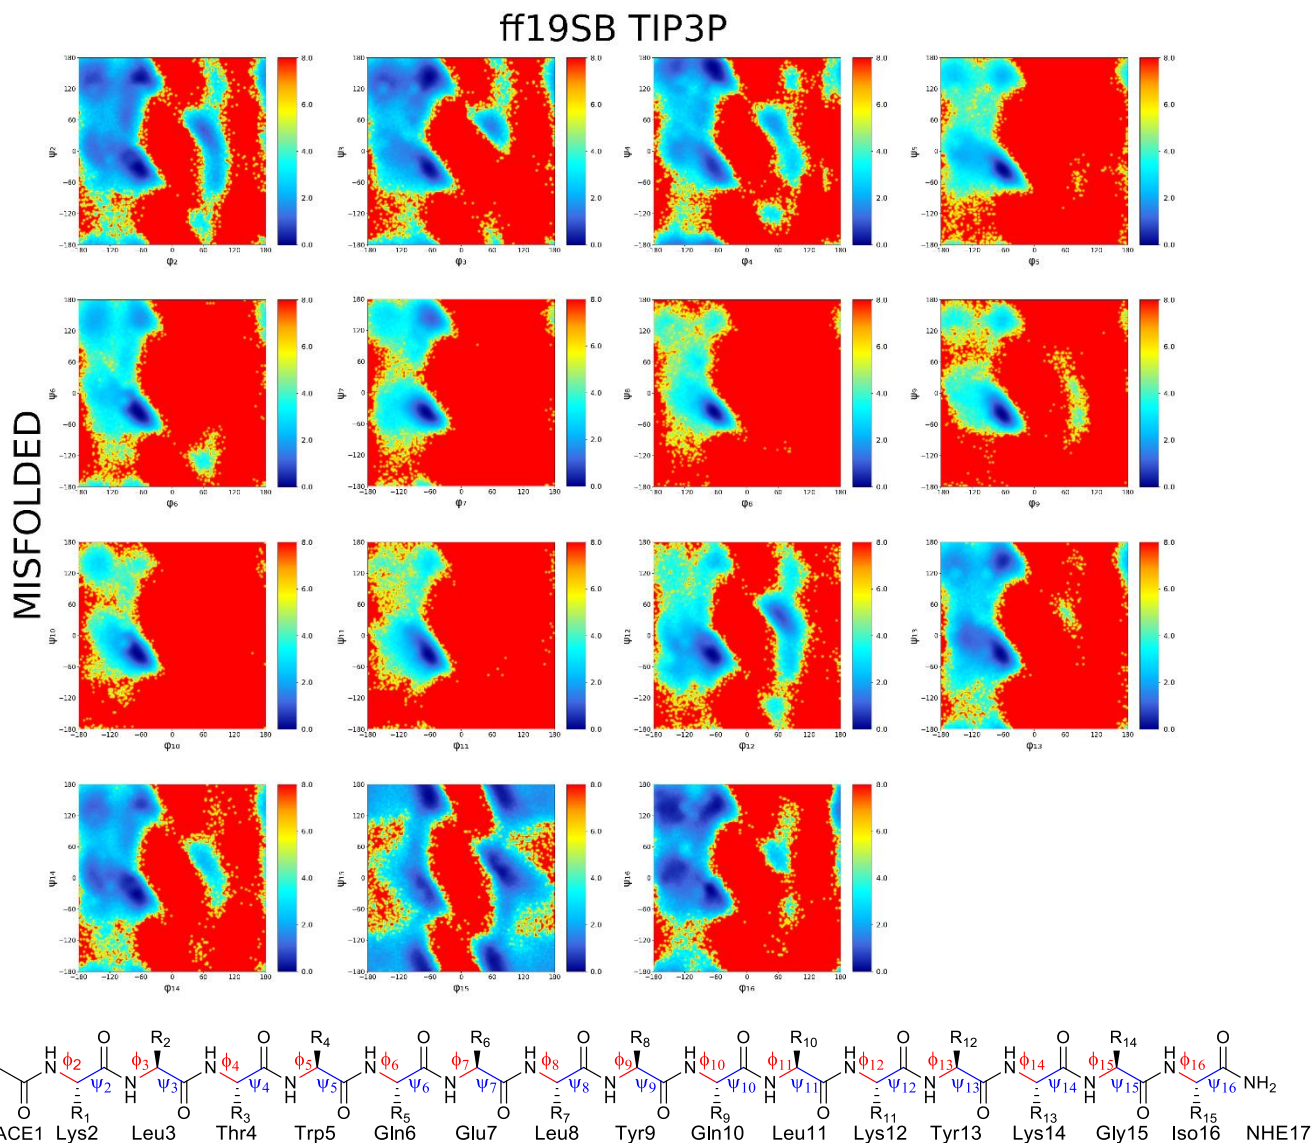

**Figure S27.** PMFs obtained from  $\phi$  and  $\psi$  dihedral distributions of H1 residues for the ff19SB/TIP3P combination from a misfolded conformation. PMFs are shown as heat maps (0.0 – 8.0 kcal/mol range) from dark blue to red. H1 sequence and representation of  $\phi$  and  $\psi$  angles numbering are also shown.

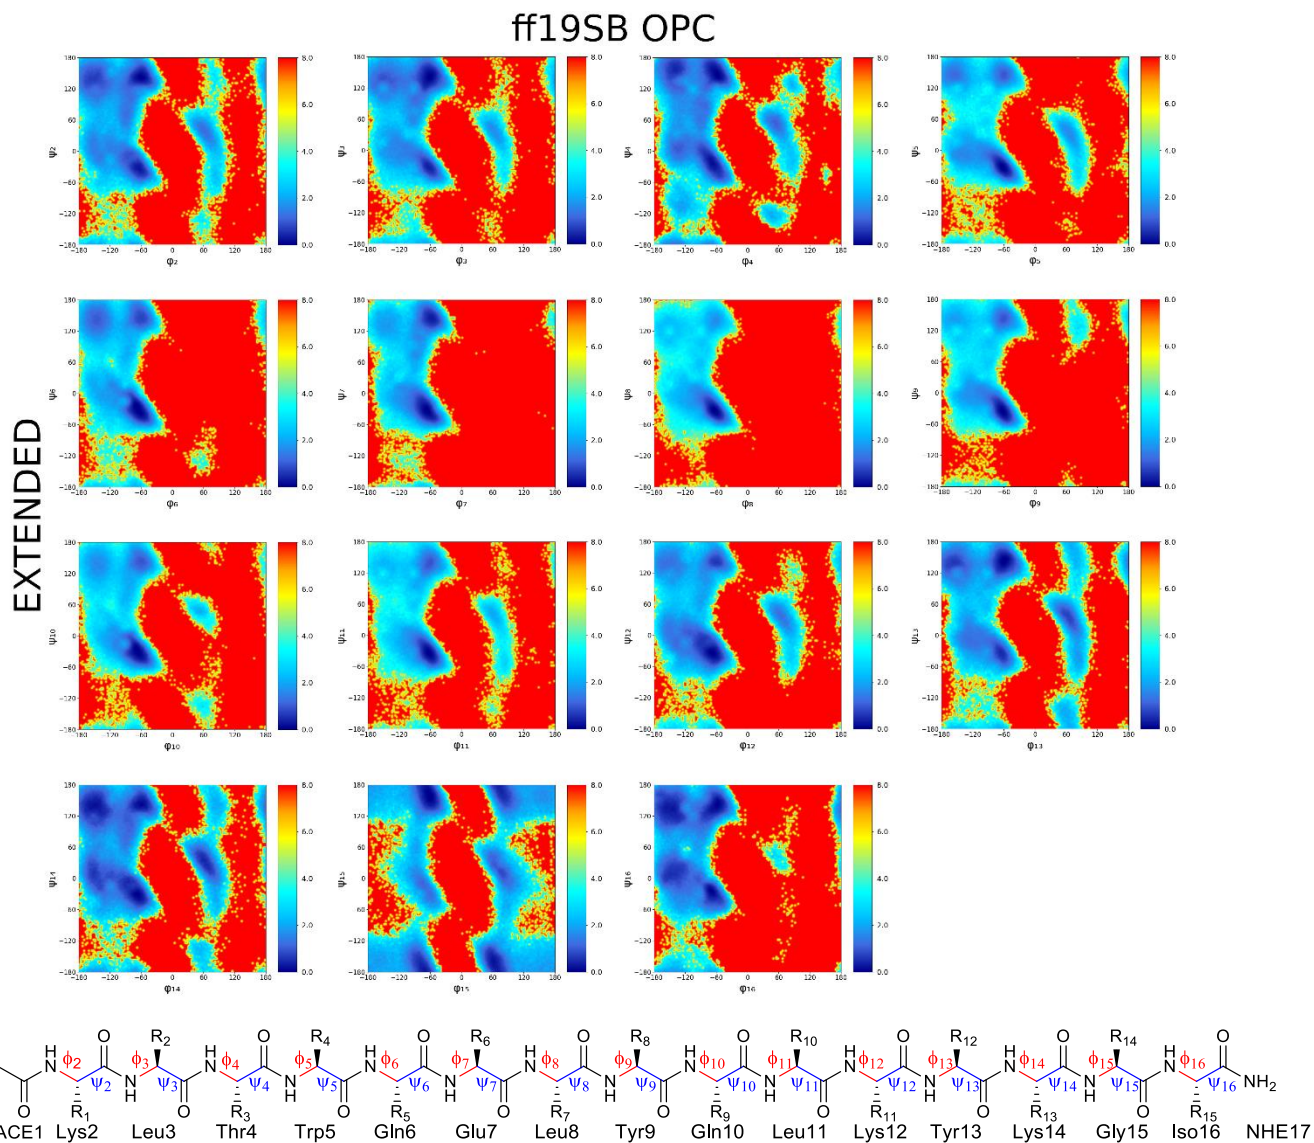

**Figure S28.** PMFs obtained from  $\phi$  and  $\psi$  dihedral distributions of H1 residues for the ff19SB/OPC combination from an extended conformation. PMFs are shown as heat maps (0.0 – 8.0 kcal/mol range) from dark blue to red. H1 sequence and representation of  $\phi$  and  $\psi$  angles numbering are also shown.

### ff19SB OPC

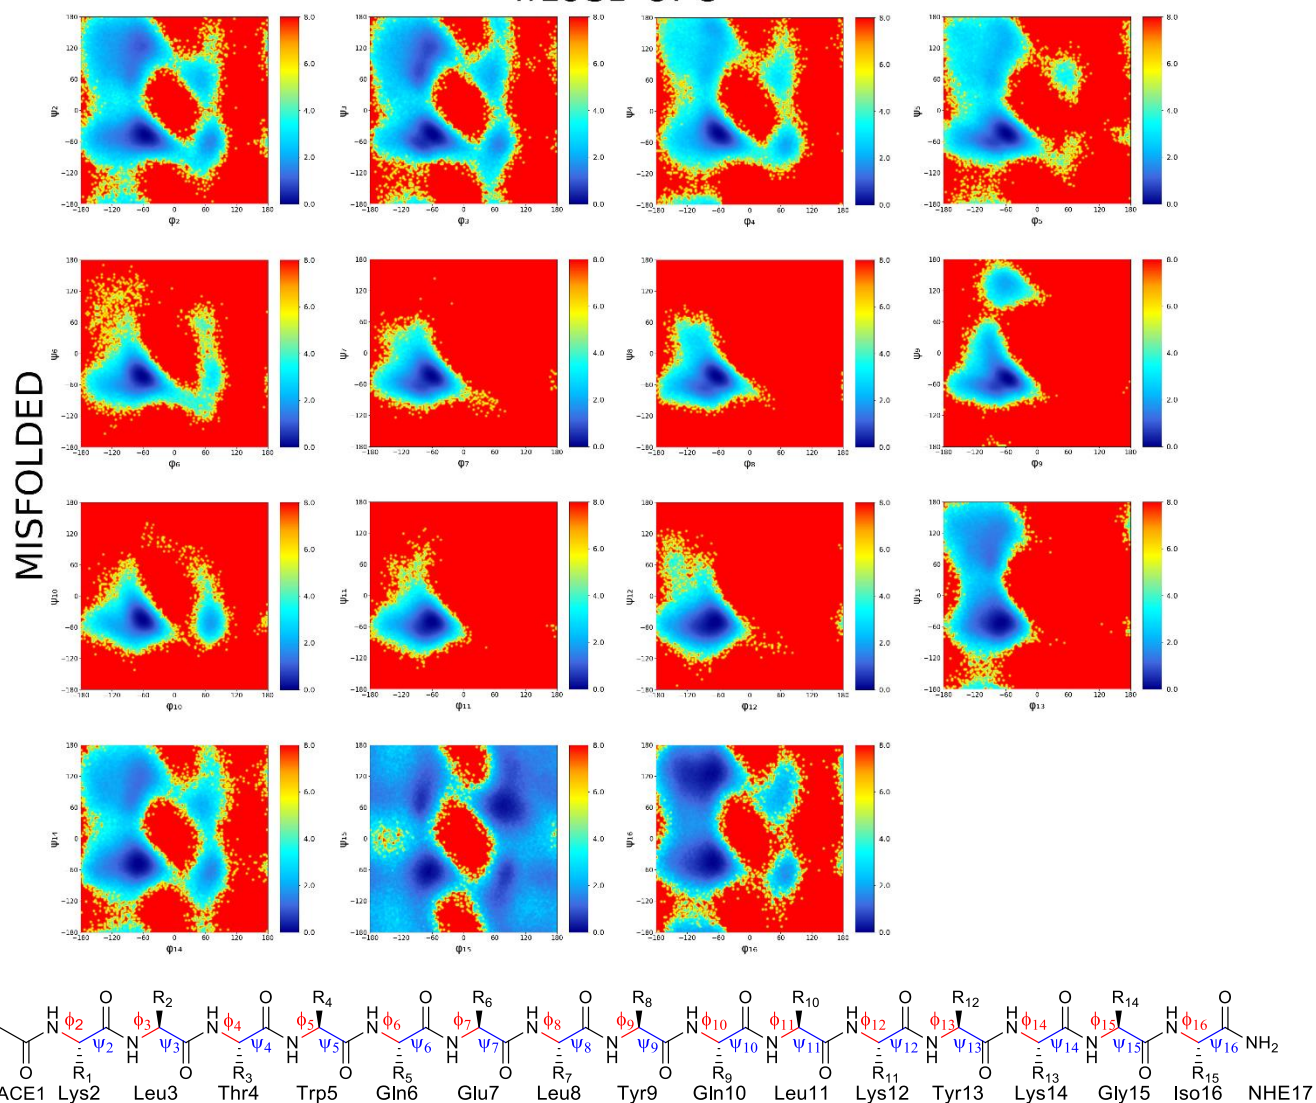

**Figure S29.** PMFs obtained from  $\phi$  and  $\psi$  dihedral distributions of H1 residues for the ff19SB/OPC combination from a misfolded conformation. PMFs are shown as heat maps (0.0 – 8.0 kcal/mol range) from dark blue to red. H1 sequence and representation of  $\phi$  and  $\psi$  angles numbering are also shown.

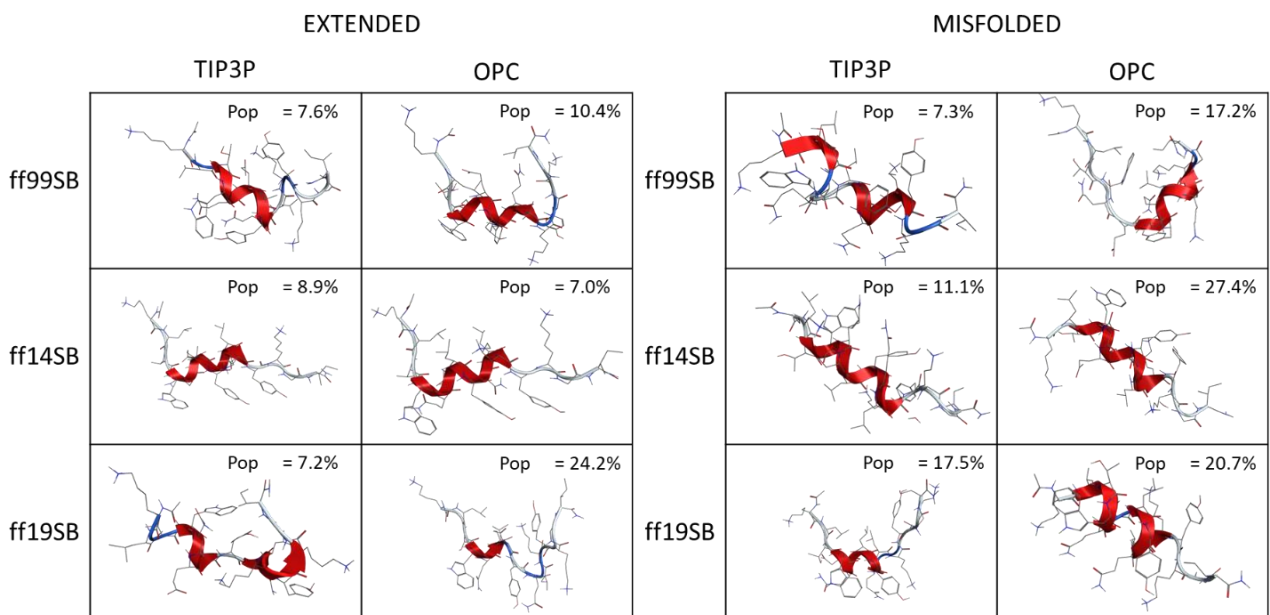

**Figure S30.** Representative conformation and population (pop%) of the second clusters from H1 trajectories.

**Table S3.** H-bond analyses from H1 trajectories. Only H-bonds involving the backbone are included in the table (donor N-H, acceptor C=O).

| ff99SB OPC |       |       |           |       |       |
|------------|-------|-------|-----------|-------|-------|
| EXTENDED   |       |       | MISFOLDED |       |       |
| acceptor   | donor | occ%  | acceptor  | donor | occ%  |
| TRP5       | TYR9  | 23.59 | LEU8      | LYS12 | 25.94 |
| THR4       | LEU8  | 17.75 | GLU7      | LEU11 | 23.66 |
| LEU8       | LYS12 | 16.61 | TYR9      | TYR13 | 21.97 |
| TYR9       | TYR13 | 15.98 | TRP5      | TYR9  | 19.9  |
| GLN6       | GLN10 | 15.12 | GLN6      | GLN10 | 18.21 |
| GLU7       | LEU11 | 13.93 | THR4      | LEU8  | 12.88 |
| LEU3       | GLU7  | 11.74 | GLN10     | LYS14 | 12.72 |
| THR4       | GLU7  | 7.01  | LEU3      | GLU7  | 8.93  |
| GLN10      | LYS14 | 6.55  | TYR9      | LYS14 | 7.53  |
| LYS2       | GLN6  | 6.45  | GLU7      | GLN10 | 7.44  |
| LEU3       | GLN6  | 5.73  | LYS2      | GLN6  | 7.37  |
|            |       |       | GLN10     | GLY15 | 6.51  |

| ff99SB TIP3P |       |       |           |       |       |
|--------------|-------|-------|-----------|-------|-------|
| EXTENDED     |       |       | MISFOLDED |       |       |
| acceptor     | donor | occ%  | acceptor  | donor | occ%  |
| TYR9         | TYR13 | 35.57 | TRP5      | TYR9  | 35.42 |
| LEU8         | LYS12 | 33.16 | LEU8      | LYS12 | 35.15 |
| GLU7         | LEU11 | 28.72 | LEU3      | GLU7  | 31.74 |
| GLN6         | GLN10 | 27.68 | TYR9      | TYR13 | 31.54 |
| TRP5         | TYR9  | 23.62 | GLU7      | LEU11 | 29.96 |
| LEU3         | GLU7  | 21.77 | GLN6      | GLN10 | 28.9  |
| GLN10        | LYS14 | 17.63 | THR4      | LEU8  | 23.33 |
| LYS2         | GLN6  | 16.01 | GLN10     | LYS14 | 19.72 |
| THR4         | LEU8  | 15.36 | LYS2      | GLN6  | 18.57 |
| LEU3         | GLN6  | 9.2   | TYR9      | LYS14 | 13.64 |
| TYR9         | LYS14 | 7.89  | GLN10     | GLY15 | 10.84 |
| LEU11        | GLY15 | 7.52  | ACE1      | TRP5  | 10.64 |
| GLN10        | GLY15 | 7.52  | LEU3      | GLN6  | 10.44 |
| ACE1         | TRP5  | 6.78  | LEU11     | GLY15 | 8.18  |
| LYS2         | TRP5  | 6.53  | GLN6      | LEU11 | 6.47  |
|              |       |       | LYS2      | TRP5  | 5.57  |
|              |       |       | TRP5      | GLN10 | 5.28  |
|              |       |       | LEU8      | TYR13 | 5.13  |

| ff14SB OPC |  |  |  |  |  |
|------------|--|--|--|--|--|
|------------|--|--|--|--|--|

| ff14SB TIP3P |  |  |  |  |  |
|--------------|--|--|--|--|--|
|--------------|--|--|--|--|--|

| EXTENDED |       |       |
|----------|-------|-------|
| acceptor | donor | occ%  |
| TRP5     | TYR9  | 46.2  |
| THR4     | LEU8  | 37.06 |
| TYR9     | TYR13 | 30.25 |
| GLN10    | LYS14 | 21.33 |
| LEU8     | LYS12 | 20.8  |
| GLU7     | LEU11 | 19.11 |
| GLN6     | GLN10 | 19.06 |
| GLN6     | LEU11 | 12.41 |
| THR4     | GLU7  | 11.72 |
| LEU3     | GLU7  | 8.91  |
| LYS2     | GLN6  | 7.74  |
| LEU11    | GLY15 | 7.65  |
| GLN10    | GLY15 | 6.36  |

| MISFOLDED |       |       |
|-----------|-------|-------|
| acceptor  | donor | occ%  |
| TYR9      | TYR13 | 37.81 |
| LEU8      | LYS12 | 29.34 |
| GLU7      | LEU11 | 26.09 |
| GLN6      | GLN10 | 23.74 |
| GLN10     | LYS14 | 20.66 |
| TRP5      | TYR9  | 12.72 |
| LEU3      | GLN6  | 10.95 |
| LEU3      | GLU7  | 10.51 |
| THR4      | LEU8  | 10.07 |
| LEU11     | GLY15 | 9.34  |
| GLN6      | TYR9  | 8.11  |
| LYS2      | GLN6  | 7.7   |
| TYR9      | LYS14 | 5.53  |
| TYR9      | LYS12 | 5.5   |
| GLN10     | GLY15 | 5.37  |
| ACE1      | TRP5  | 5.33  |

| EXTENDED |       |       |
|----------|-------|-------|
| acceptor | donor | occ%  |
| TRP5     | TYR9  | 46.13 |
| TYR9     | TYR13 | 45.18 |
| GLU7     | LEU11 | 39.23 |
| LEU8     | LYS12 | 38.88 |
| GLN10    | LYS14 | 35.65 |
| GLN6     | GLN10 | 35.29 |
| THR4     | LEU8  | 31.24 |
| LEU3     | GLU7  | 31.11 |
| LYS2     | GLN6  | 25.18 |
| LEU11    | GLY15 | 18.67 |
| ACE1     | TRP5  | 15.82 |
| GLN10    | GLY15 | 7.97  |
| LEU11    | ILE16 | 7.1   |

| MISFOLDED |       |       |
|-----------|-------|-------|
| acceptor  | donor | occ%  |
| TRP5      | TYR9  | 49.83 |
| TYR9      | TYR13 | 40.46 |
| GLU7      | LEU11 | 39.56 |
| LEU8      | LYS12 | 37.93 |
| THR4      | LEU8  | 34.15 |
| GLN6      | GLN10 | 33.25 |
| GLN10     | LYS14 | 26.96 |
| LEU3      | GLU7  | 19.75 |
| LYS2      | GLN6  | 15.38 |
| LEU11     | GLY15 | 10.46 |
| ACE1      | TRP5  | 10.39 |
| GLN10     | GLY15 | 7.91  |
| THR4      | GLU7  | 7.42  |
| TYR9      | LYS14 | 6     |

| ff19SB OPC |       |       |           |       |       |
|------------|-------|-------|-----------|-------|-------|
| EXTENDED   |       |       | MISFOLDED |       |       |
| acceptor   | donor | occ%  | acceptor  | donor | occ%  |
| LEU8       | LYS12 | 14.25 | LEU8      | LYS12 | 34.48 |
| TYR9       | TYR13 | 14.02 | TRP5      | TYR9  | 32.19 |
| GLU7       | LEU11 | 13.2  | TYR9      | LYS14 | 26.75 |
| TRP5       | TYR9  | 12.92 | LEU3      | GLU7  | 25.95 |
| GLU7       | GLN10 | 11.43 | TYR9      | TYR13 | 25.33 |
| THR4       | LEU8  | 9.88  | GLU7      | LEU11 | 24.86 |
| TYR9       | LYS12 | 8.26  | GLN6      | GLN10 | 23.14 |
| GLN6       | GLN10 | 8.07  | THR4      | LEU8  | 22.81 |
| THR4       | GLU7  | 7.32  | TRP5      | GLN10 | 17.07 |
| GLN10      | LYS14 | 7.11  | LEU8      | TYR13 | 16.75 |
| GLN10      | TYR13 | 5.5   | LYS2      | GLN6  | 15.89 |
|            |       |       | GLN10     | GLY15 | 15.7  |
|            |       |       | ACE1      | TRP5  | 14.54 |
|            |       |       | GLN10     | LYS14 | 13.21 |
|            |       |       | GLU7      | LYS12 | 11.39 |
|            |       |       | GLN6      | LEU11 | 11.02 |
|            |       |       | LEU3      | LEU8  | 10.15 |
|            |       |       | ACE1      | GLN6  | 8     |
|            |       |       | LEU11     | ILE16 | 7.72  |
|            |       |       | THR4      | TYR9  | 7.66  |
|            |       |       | LEU11     | GLY15 | 7.02  |
|            |       |       | GLN10     | ILE16 | 5.63  |
|            |       |       | LEU3      | GLN6  | 5.45  |

| ff19SB TIP3P |       |       |           |       |       |
|--------------|-------|-------|-----------|-------|-------|
| EXTENDED     |       |       | MISFOLDED |       |       |
| acceptor     | donor | occ%  | acceptor  | donor | occ%  |
| TRP5         | TYR9  | 31.45 | GLU7      | LEU11 | 39.46 |
| GLU7         | LEU11 | 29.39 | TRP5      | TYR9  | 37.55 |
| TYR9         | TYR13 | 26.5  | LEU8      | LYS12 | 30.56 |
| LEU8         | LYS12 | 24.05 | TYR9      | TYR13 | 27.23 |
| THR4         | LEU8  | 21.95 | THR4      | LEU8  | 27    |
| GLN6         | GLN10 | 21.9  | GLN10     | LYS14 | 21.8  |
| GLN10        | LYS14 | 20.12 | GLN6      | GLN10 | 20.3  |
| LEU11        | GLY15 | 9.3   | GLU7      | GLN10 | 9.53  |
| THR4         | GLU7  | 7.78  | LEU11     | GLY15 | 9.03  |
| LEU3         | GLU7  | 7.56  | THR4      | GLU7  | 8.81  |
| LYS2         | GLN6  | 6.9   | TYR9      | LYS12 | 6.21  |
| LEU3         | GLN6  | 6.75  | LYS2      | GLN6  | 5.35  |
| GLN10        | TYR13 | 5.99  |           |       |       |
| GLU7         | GLN10 | 5.82  |           |       |       |
| TYR9         | LYS12 | 5.74  |           |       |       |

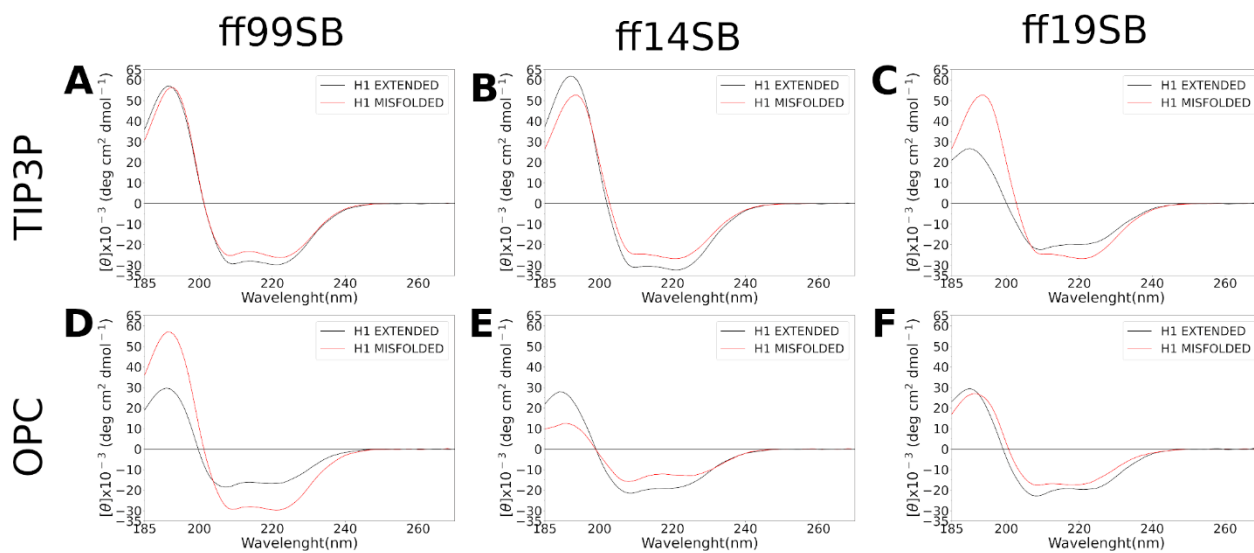

**Figure 31.** SESA CD spectra of H1 calculated using the main cluster obtained from the last 500 ns of aMD trajectory, for each combination. Results from extended and misfolded simulations are reported in black and red lines, respectively.



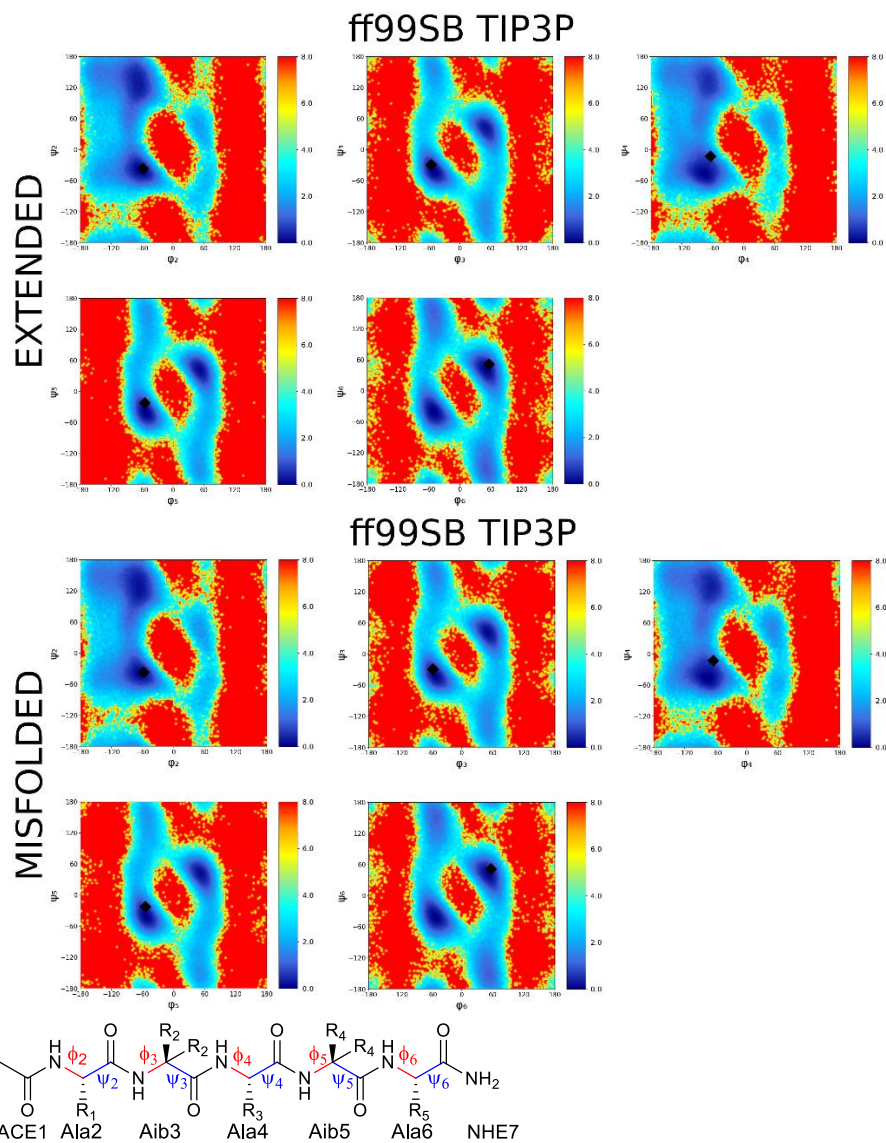

**Figure S32.** PMFs obtained from  $\varphi$  and  $\psi$  dihedral distributions of H2 residues for the ff99SB/TIP3P combination from extended (top panels) and misfolded (bottom panels) conformations. PMFs are shown as heat maps (0.0 – 8.0 kcal/mol range) from dark blue to red. The native conformation's  $\varphi$  and  $\psi$  angles are reported as black diamonds. H2 sequence and representation of  $\varphi$  and  $\psi$  angles numbering are also shown.

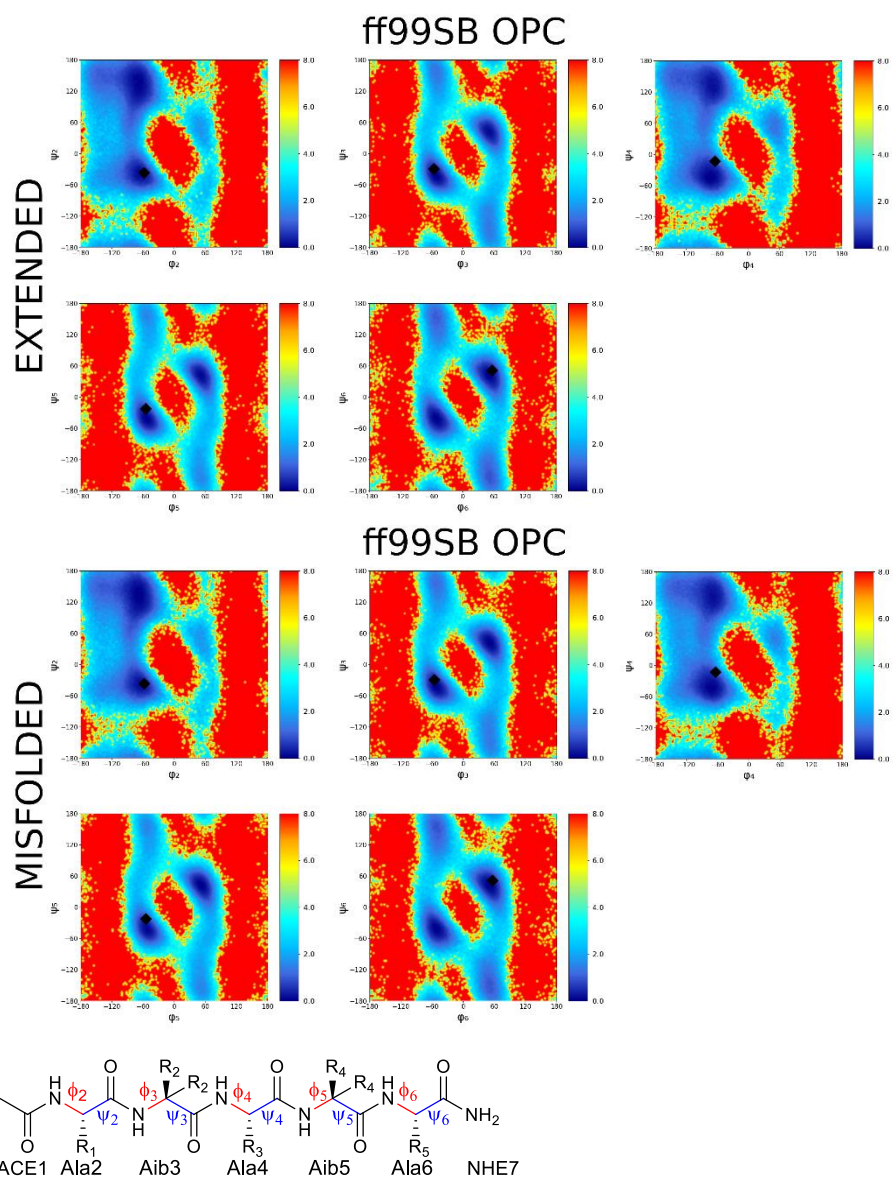

**Figure S33.** PMFs obtained from  $\phi$  and  $\psi$  dihedral distributions of H2 residues for the ff99SB/OPC combination from extended (top panels) and misfolded (bottom panels) conformations. PMFs are shown as heat maps (0.0 – 8.0 kcal/mol range) from dark blue to red. The native conformation's  $\phi$  and  $\psi$  angles are reported as black diamonds. H2 sequence and representation of  $\phi$  and  $\psi$  angles numbering are also shown.

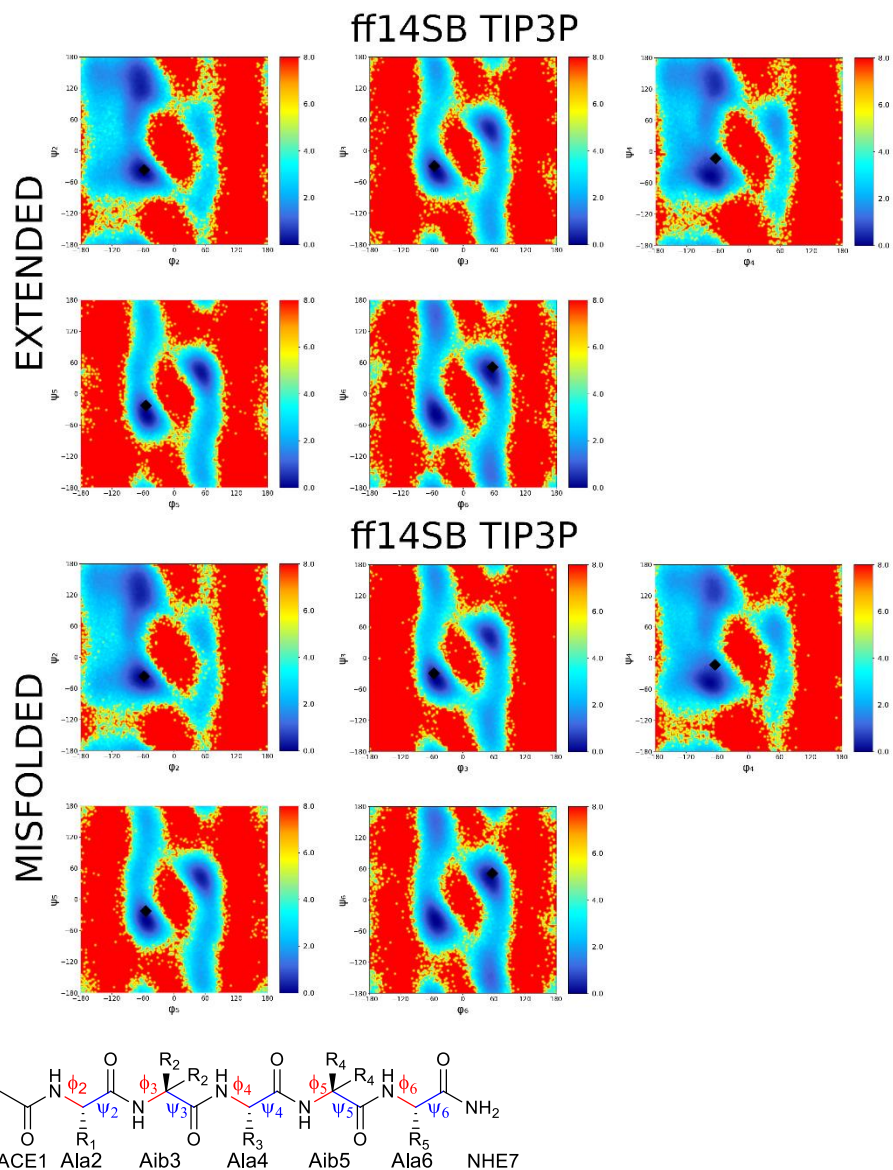

**Figure S34.** PMFs obtained from  $\varphi$  and  $\psi$  dihedral distributions of H2 residues for the ff14SB/TIP3P combination from extended (top panels) and misfolded (bottom panels) conformations. PMFs are shown as heat maps (0.0 – 8.0 kcal/mol range) from dark blue to red. The native conformation's  $\varphi$  and  $\psi$  angles are reported as black diamonds. H2 sequence and representation of  $\varphi$  and  $\psi$  angles numbering are also shown.

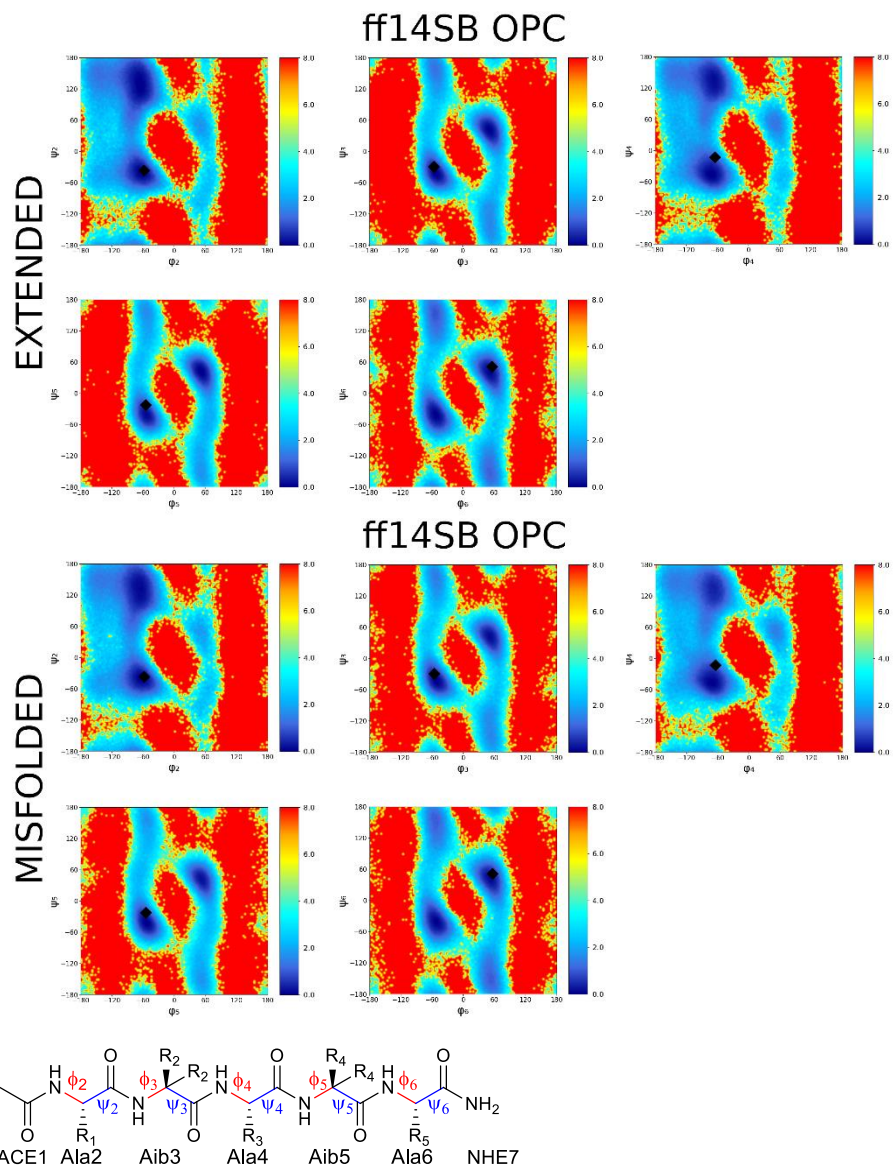

**Figure S35.** PMFs obtained from  $\phi$  and  $\psi$  dihedral distributions of H2 residues for the ff14SB/OPC combination from extended (top panels) and misfolded (bottom panels) conformations. PMFs are shown as heat maps (0.0 – 8.0 kcal/mol range) from dark blue to red. The native conformation's  $\phi$  and  $\psi$  angles are reported as black diamonds. H2 sequence and representation of  $\phi$  and  $\psi$  angles numbering are also shown.

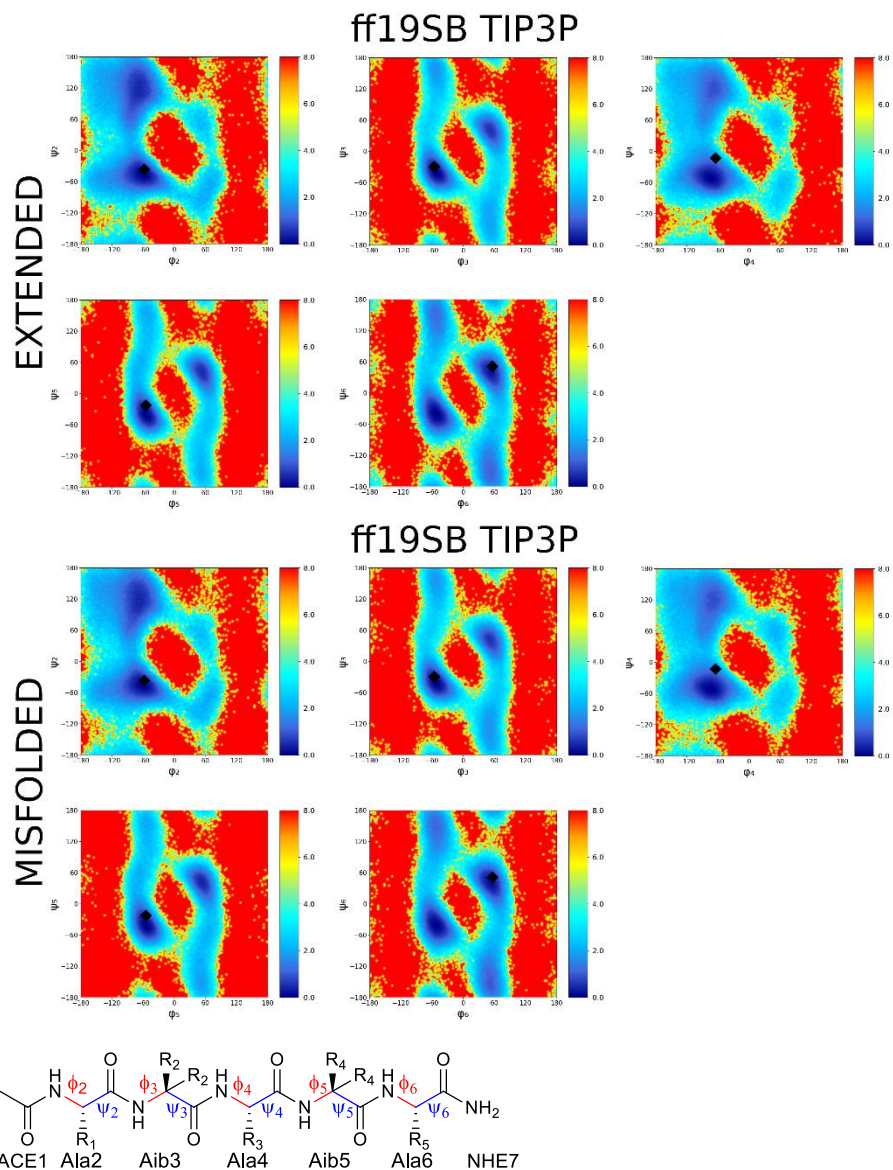

**Figure S36.** PMFs obtained from  $\phi$  and  $\psi$  dihedral distributions of H2 residues for the ff19SB/TIP3P combination from extended (top panels) and misfolded (bottom panels) conformations. PMFs are shown as heat maps (0.0 – 8.0 kcal/mol range) from dark blue to red. The native conformation's  $\phi$  and  $\psi$  angles are reported as black diamonds. H2 sequence and representation of  $\phi$  and  $\psi$  angles numbering are also shown.

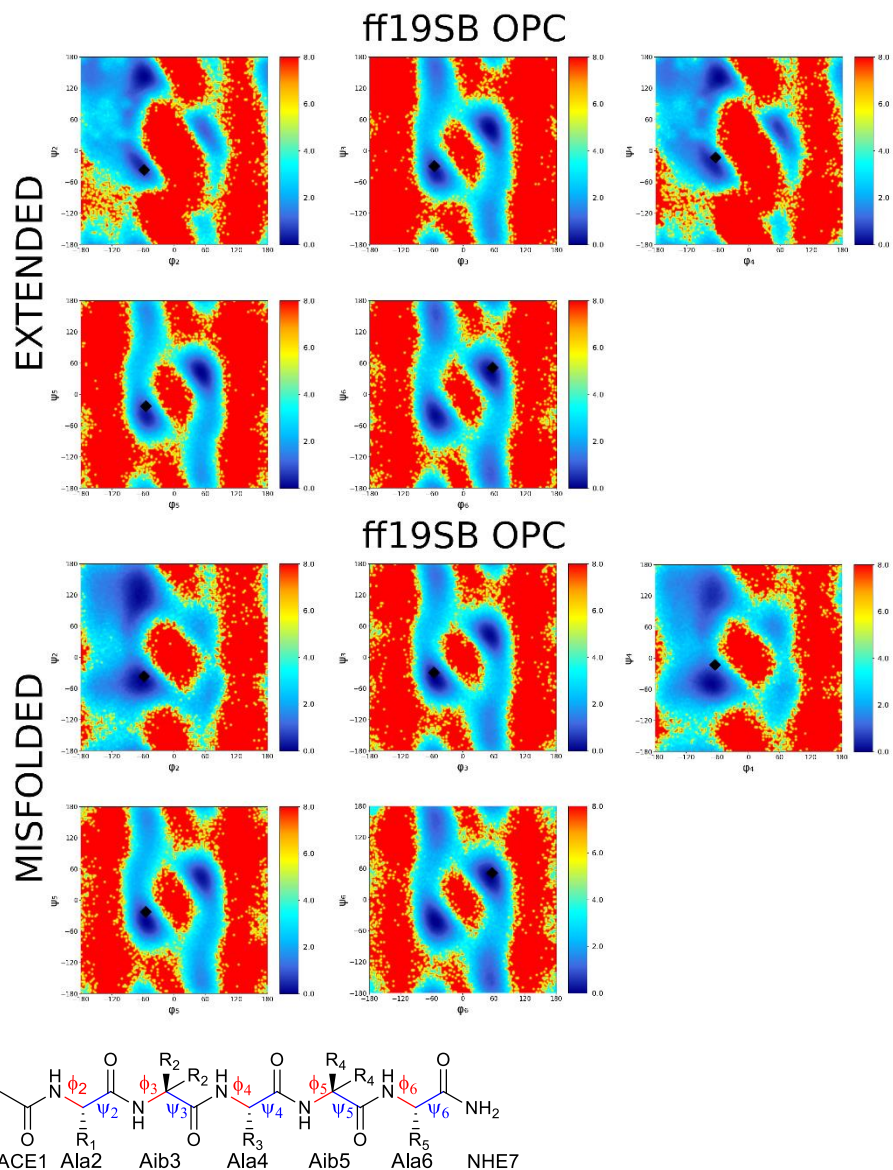

**Figure S37.** PMFs obtained from  $\phi$  and  $\psi$  dihedral distributions of H2 residues for the ff19SB/OPC combination from extended (top panels) and misfolded (bottom panels) conformations. PMFs are shown as heat maps (0.0 – 8.0 kcal/mol range) from dark blue to red. The native conformation's  $\phi$  and  $\psi$  angles are reported as black diamonds. H2 sequence and representation of  $\phi$  and  $\psi$  angles numbering are also shown.

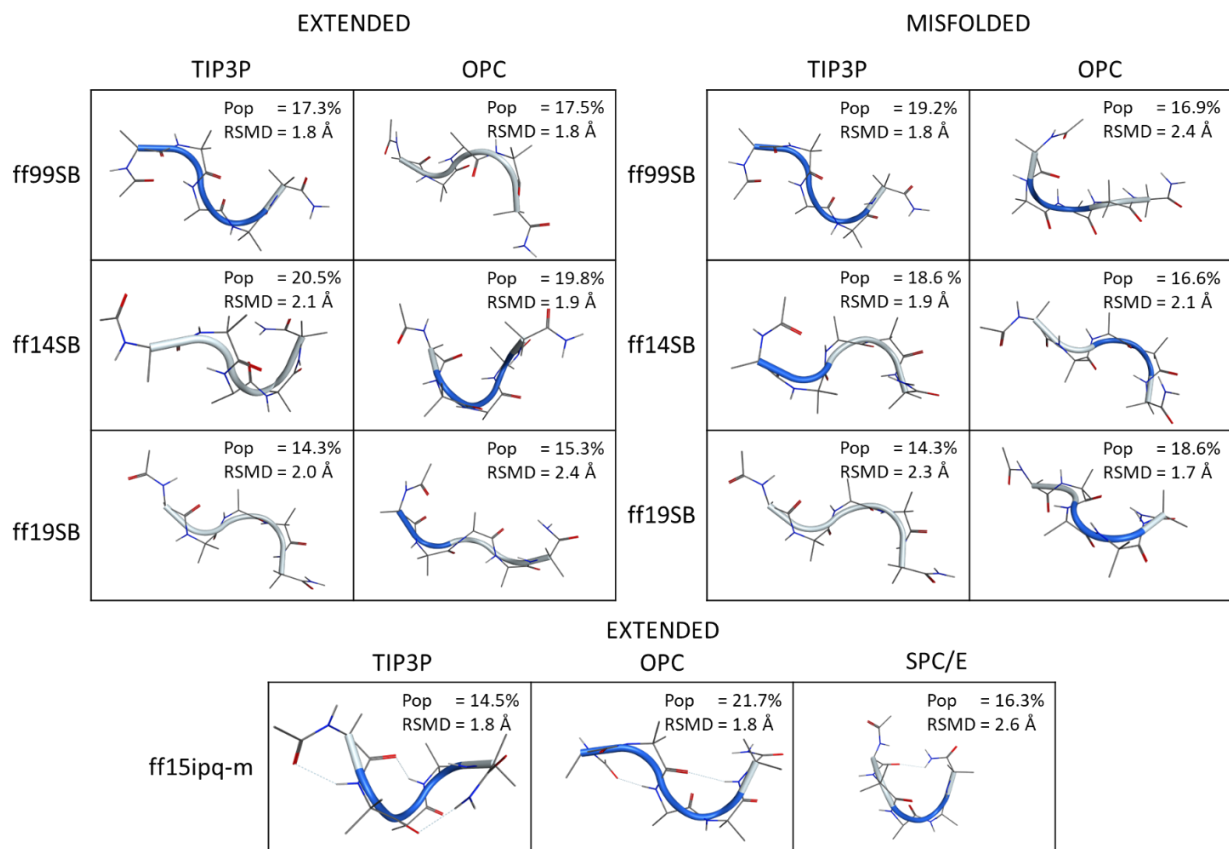

**Figure S38.** Representative conformation of the second clusters from H2 trajectories. Population (pop%) and RMSD vs native structure are also shown in the figure.

**Table S4.** H-bond analyses from H2 trajectories. Only H-bonds involving the backbone are included in the table (donor N-H, acceptor C=O). Native H-bonds are highlighted in bold.

| NATIVE      |       |      |             |             |      |              |             |      |             |             |      |
|-------------|-------|------|-------------|-------------|------|--------------|-------------|------|-------------|-------------|------|
| acceptor    |       |      | donor       |             |      | Distance     |             |      |             |             |      |
| <b>AIB3</b> |       |      | <b>AIB6</b> |             |      | 2.91         |             |      |             |             |      |
| <b>AIB3</b> |       |      | <b>AIB5</b> |             |      | 2.94         |             |      |             |             |      |
| <b>ALA2</b> |       |      | <b>AIB5</b> |             |      | 2.97         |             |      |             |             |      |
| <b>ALA2</b> |       |      | <b>ALA4</b> |             |      | 3.02         |             |      |             |             |      |
| <b>ALA4</b> |       |      | <b>AIB6</b> |             |      | 3.04         |             |      |             |             |      |
| <b>ACE1</b> |       |      | <b>ALA4</b> |             |      | 3.13         |             |      |             |             |      |
| <b>ACE1</b> |       |      | <b>AIB3</b> |             |      | 3.22         |             |      |             |             |      |
| <b>AIB5</b> |       |      | <b>NHE7</b> |             |      | 3.34         |             |      |             |             |      |
| <b>ACE1</b> |       |      | <b>AIB5</b> |             |      | 4.43         |             |      |             |             |      |
| ff99SB OPC  |       |      |             |             |      | ff99SB TIP3P |             |      |             |             |      |
| EXTENDED    |       |      | MISFOLDED   |             |      | EXTENDED     |             |      | MISFOLDED   |             |      |
| acceptor    | donor | occ% | acceptor    | donor       | occ% | acceptor     | donor       | occ% | acceptor    | donor       | occ% |
| ALA2        | AIB6  | 5.34 | <b>ACE1</b> | <b>ALA4</b> | 5.22 | <b>ACE1</b>  | <b>ALA4</b> | 8.63 | <b>ACE1</b> | <b>ALA4</b> | 7.75 |
|             |       |      |             |             |      | ALA2         | AIB6        | 8.01 | ALA2        | AIB6        | 6.82 |

| ff14SB OPC |       |      |           |       |      |
|------------|-------|------|-----------|-------|------|
| EXTENDED   |       |      | MISFOLDED |       |      |
| acceptor   | donor | occ% | acceptor  | donor | occ% |
| ACE1       | ALA4  | 5.90 | ALA2      | AIB6  | 6.90 |
| ALA2       | AIB6  | 5.86 | ACE1      | ALA4  | 5.82 |

| ff19SB OPC |       |      |           |       |      |
|------------|-------|------|-----------|-------|------|
| EXTENDED   |       |      | MISFOLDED |       |      |
| acceptor   | donor | occ% | acceptor  | donor | occ% |
|            |       |      | ALA2      | AIB6  | 6.06 |
|            |       |      | ACE1      | ALA4  | 5.30 |

| ff15ipq-m OPC |       |       |
|---------------|-------|-------|
| acceptor      | donor | occ%  |
| ALA4          | NHE7  | 12.43 |
| ACE1          | ALA4  | 8.05  |
| AIB3          | AIB5  | 7.62  |
| ACE1          | AIB3  | 7.38  |

| ff15ipq-m TIP3P |       |       |
|-----------------|-------|-------|
| acceptor        | donor | occ%  |
| ALA4            | NHE7  | 10.13 |
| ACE1            | ALA4  | 6.00  |
| ACE1            | AIB3  | 5.11  |

| ACE1         | AIB5  | 5.30 | ALA4      | AIB6  | 5.02 |
|--------------|-------|------|-----------|-------|------|
| ff14SB TIP3P |       |      |           |       |      |
| EXTENDED     |       |      | MISFOLDED |       |      |
| acceptor     | donor | occ% | acceptor  | donor | occ% |
| ALA2         | AIB6  | 8.68 | ALA2      | AIB6  | 9.88 |
| ACE1         | ALA4  | 8.58 | ACE1      | ALA4  | 8.25 |
| ACE1         | AIB5  | 6.74 | ACE1      | AIB5  | 6.63 |

| ff19SB TIP3P |       |       |           |       |       |
|--------------|-------|-------|-----------|-------|-------|
| EXTENDED     |       |       | MISFOLDED |       |       |
| acceptor     | donor | occ%  | acceptor  | donor | occ%  |
| ALA2         | AIB6  | 11.35 | ALA2      | AIB6  | 10.86 |
| ACE1         | ALA4  | 8.56  | ACE1      | ALA4  | 8.16  |
| ACE1         | AIB5  | 7.12  | ACE1      | AIB5  | 6.66  |
|              |       |       | ALA4      | AIB6  | 5.54  |

| ff15ipq-m SPC/E |       |      |
|-----------------|-------|------|
| acceptor        | donor | occ% |
| ALA4            | NHE7  | 8.50 |
| ACE1            | ALA4  | 6.30 |

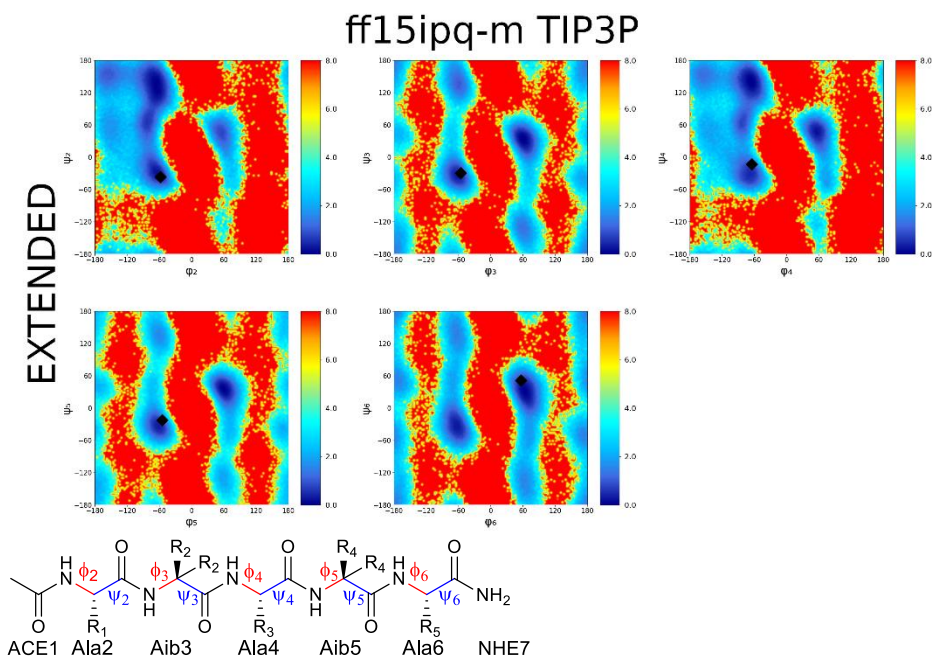

**Figure S39.** PMFs obtained from  $\phi$  and  $\psi$  dihedral distributions of H2 residues for the ff15ipq-m/TIP3P combination from an extended conformation. PMFs are shown as heat maps (0.0 – 8.0 kcal/mol range) from dark blue to red. The native conformation's  $\phi$  and  $\psi$  angles are reported as black diamonds. H2 sequence and representation of  $\phi$  and  $\psi$  angles numbering are also shown.



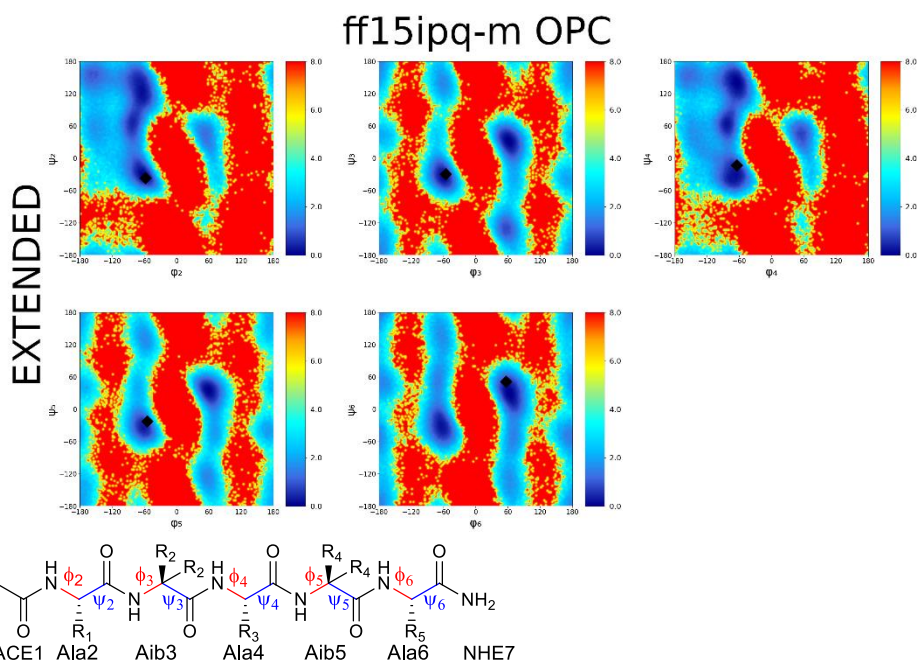

**Figure S40.** PMFs obtained from  $\phi$  and  $\psi$  dihedral distributions of H2 residues for the ff15ipq-m/OPC combination from an extended conformation. PMFs are shown as heat maps (0.0 – 8.0 kcal/mol range) from dark blue to red. The native conformation's  $\phi$  and  $\psi$  angles are reported as black diamonds. H2 sequence and representation of  $\phi$  and  $\psi$  angles numbering are also shown.

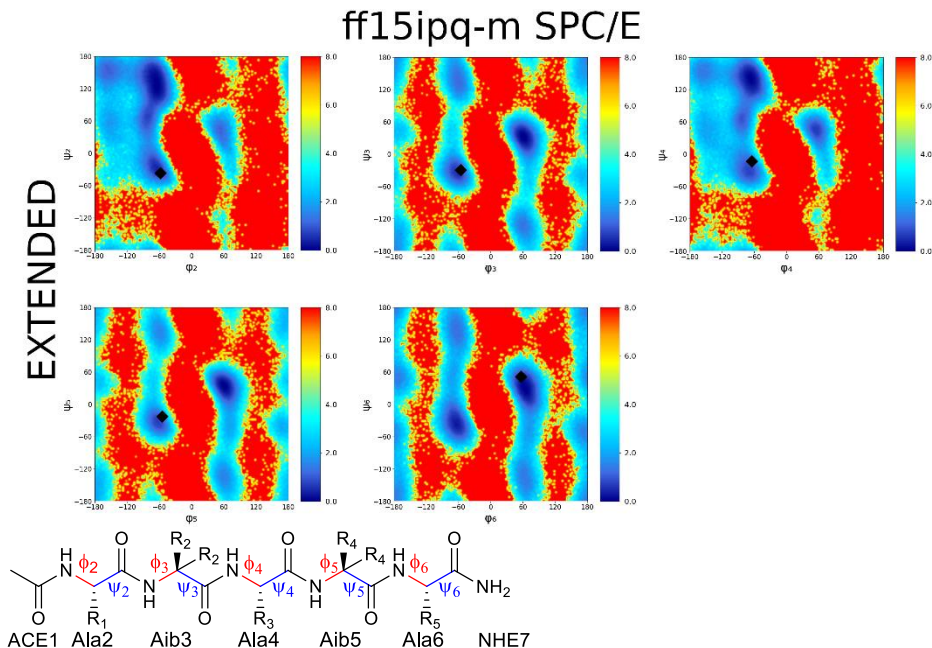

**Figure S41.** PMFs obtained from  $\phi$  and  $\psi$  dihedral distributions of H2 residues for the ff15ipq-m/SPC/E combination from an extended conformation. PMFs are shown as heat maps (0.0 – 8.0 kcal/mol range) from dark blue to red. The native conformation's  $\phi$  and  $\psi$  angles are reported as black diamonds. H2 sequence and representation of  $\phi$  and  $\psi$  angles numbering are also shown.

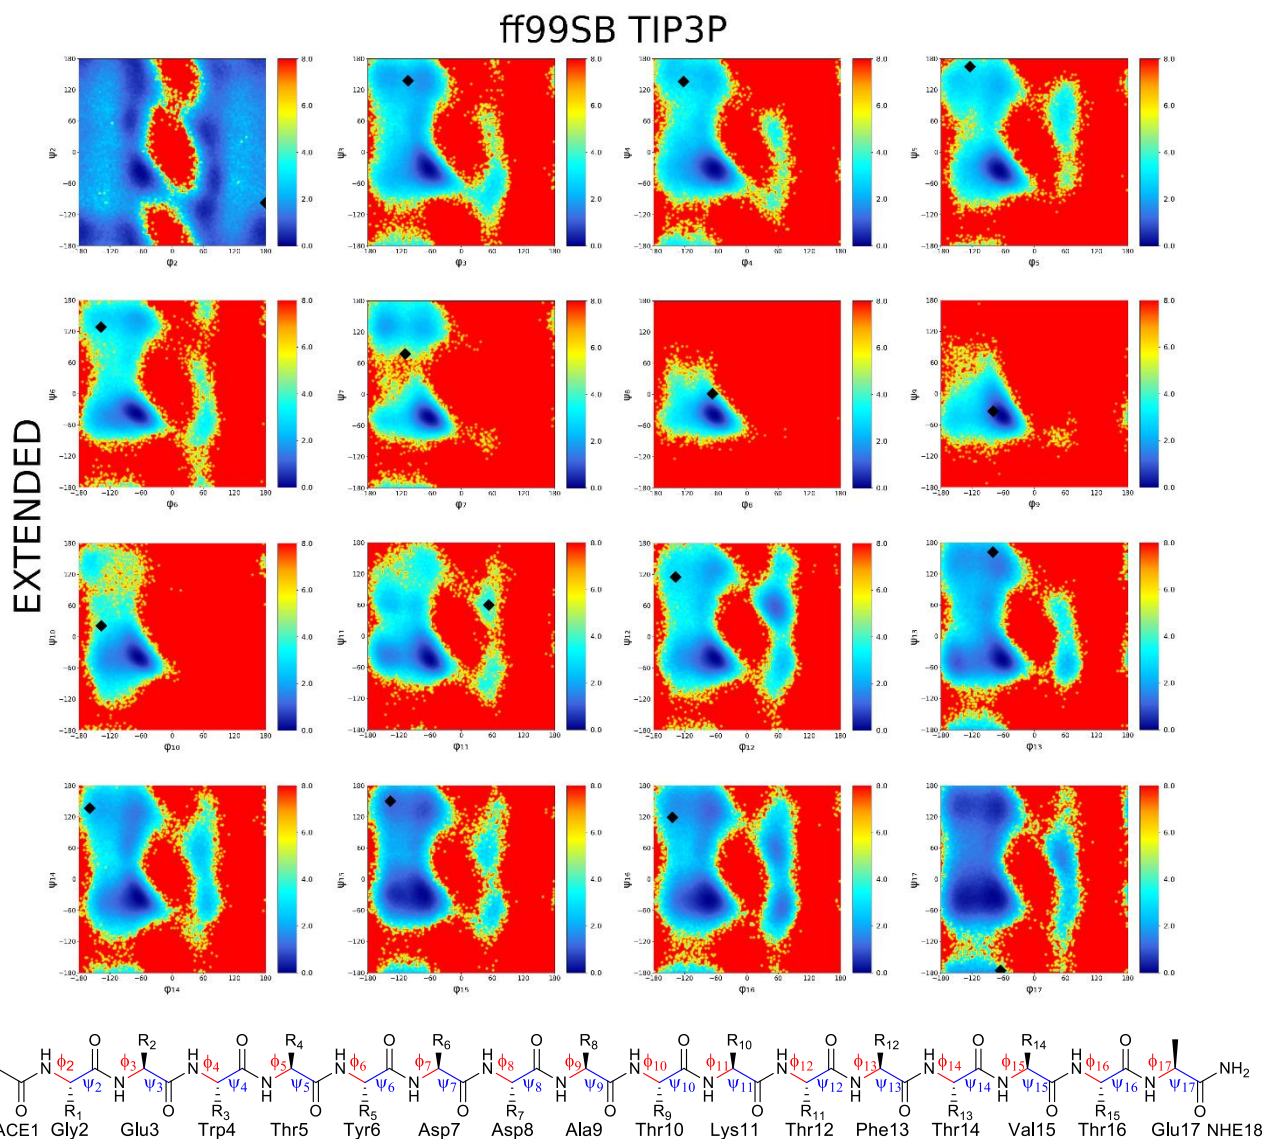

**Figure S42.** PMFs obtained from  $\phi$  and  $\psi$  dihedral distributions of B1 residues for the ff99SB/TIP3P combination from an extended conformation. PMFs are shown as heat maps (0.0 – 8.0 kcal/mol range) from dark blue to red. The native conformation's  $\phi$  and  $\psi$  angles are reported as black diamonds. B1 sequence and representation of  $\phi$  and  $\psi$  angles numbering are also shown.

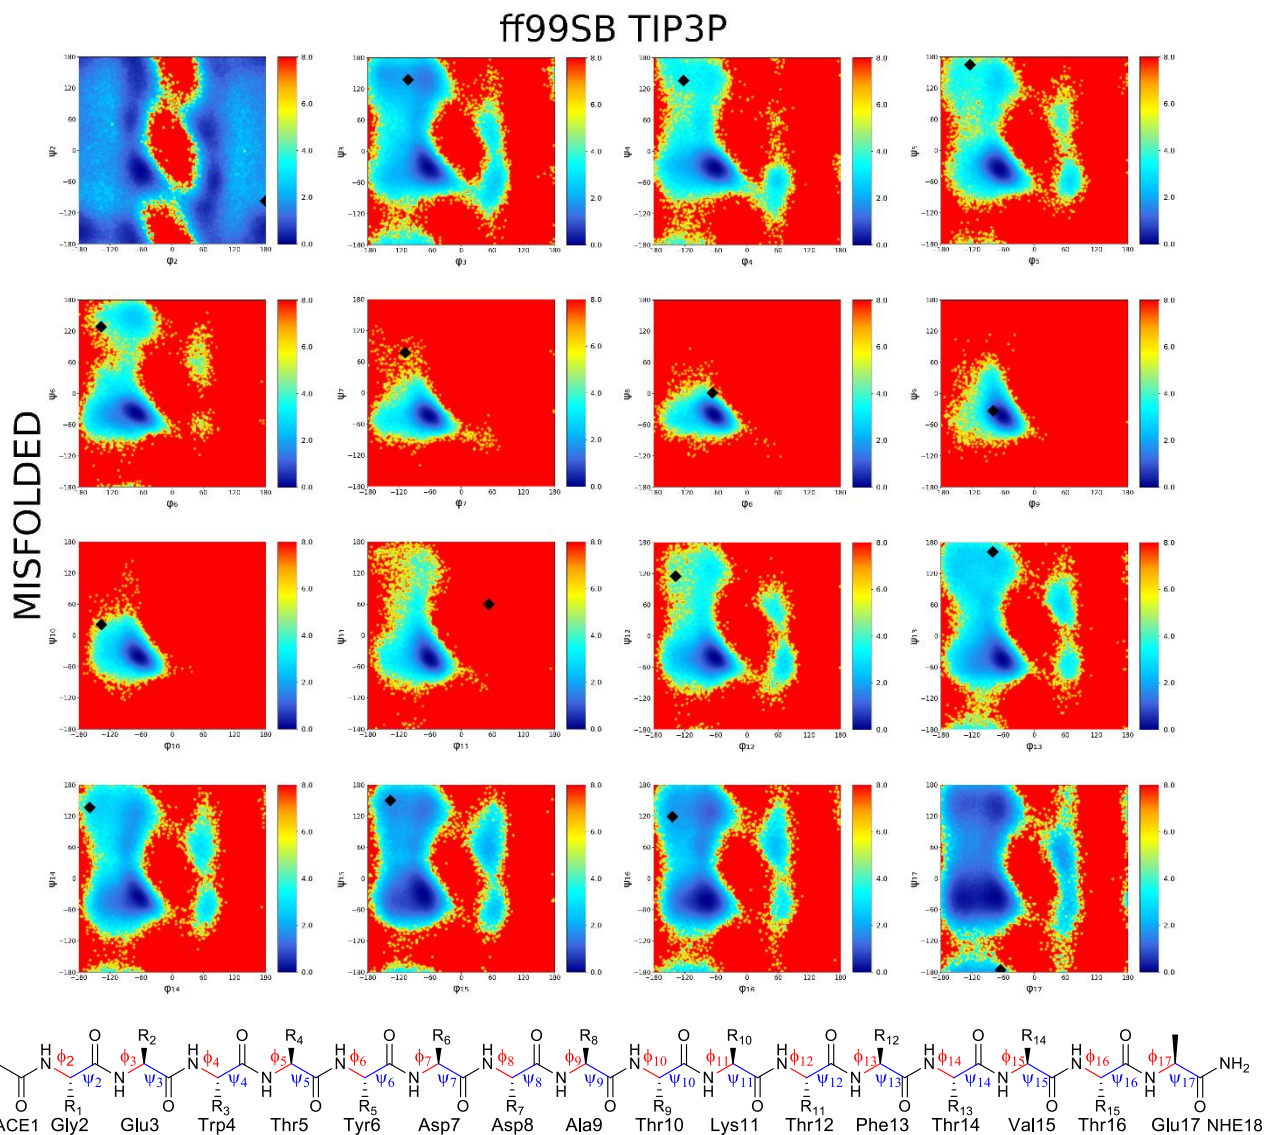

**Figure S43.** PMFs obtained from  $\phi$  and  $\psi$  dihedral distributions of B1 residues for the ff99SB/TIP3P combination from a misfolded conformation. PMFs are shown as heat maps (0.0 – 8.0 kcal/mol range) from dark blue to red. The native conformation's  $\phi$  and  $\psi$  angles are reported as black diamonds. B1 sequence and representation of  $\phi$  and  $\psi$  angles numbering are also shown.

### ff99SB OPC

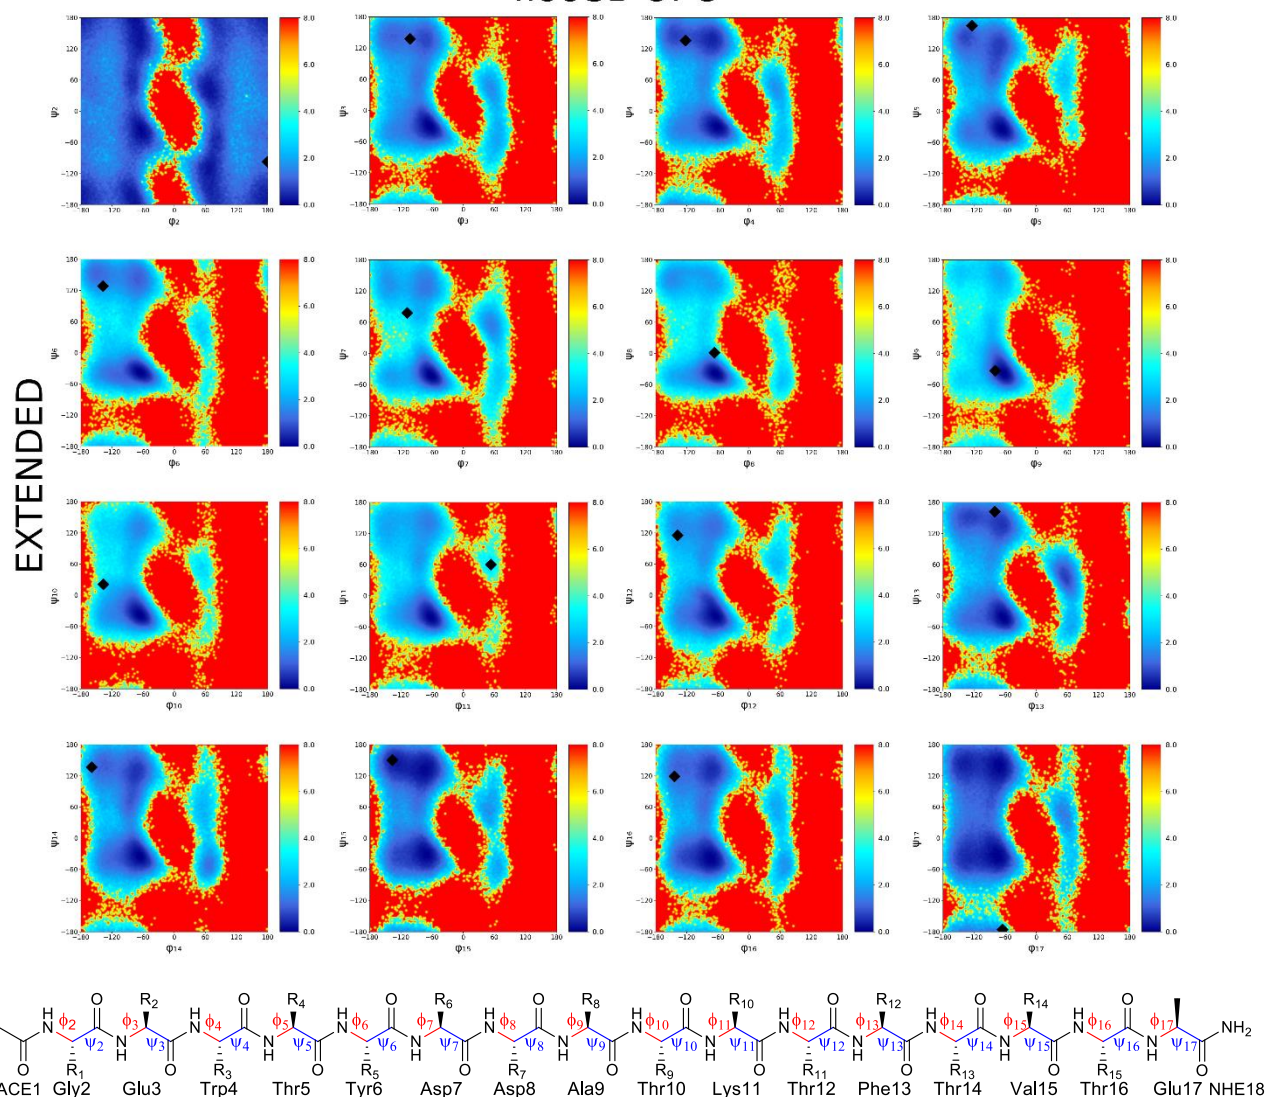

**Figure S44.** PMFs obtained from  $\phi$  and  $\psi$  dihedral distributions of B1 residues for the ff99SB/OPC combination from an extended conformation. PMFs are shown as heat maps (0.0 – 8.0 kcal/mol range) from dark blue to red. The native conformation's  $\phi$  and  $\psi$  angles are reported as black diamonds. B1 sequence and representation of  $\phi$  and  $\psi$  angles numbering are also shown.

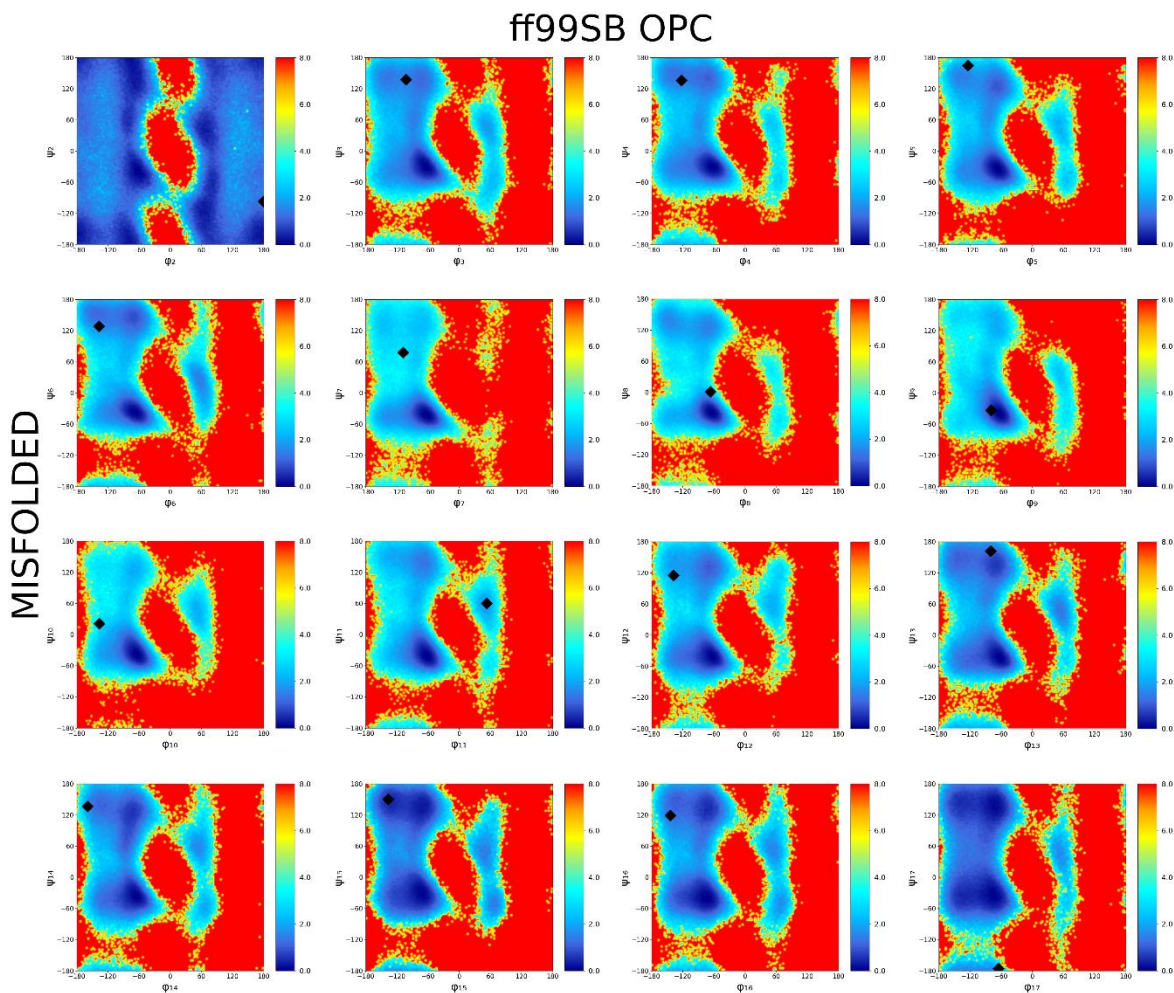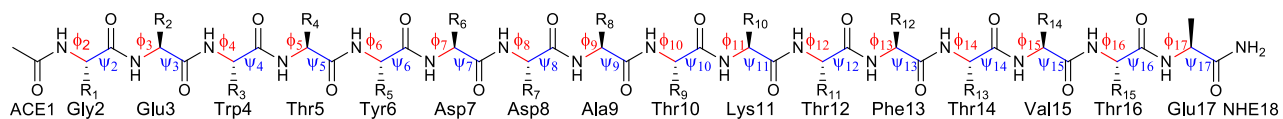

**Figure S45.** PMFs obtained from  $\phi$  and  $\psi$  dihedral distributions of B1 residues for the ff99SB/OPC combination from a misfolded conformation. PMFs are shown as heat maps (0.0 – 8.0 kcal/mol range) from dark blue to red. The native conformation's  $\phi$  and  $\psi$  angles are reported as black diamonds. B1 sequence and representation of  $\phi$  and  $\psi$  angles numbering are also shown.

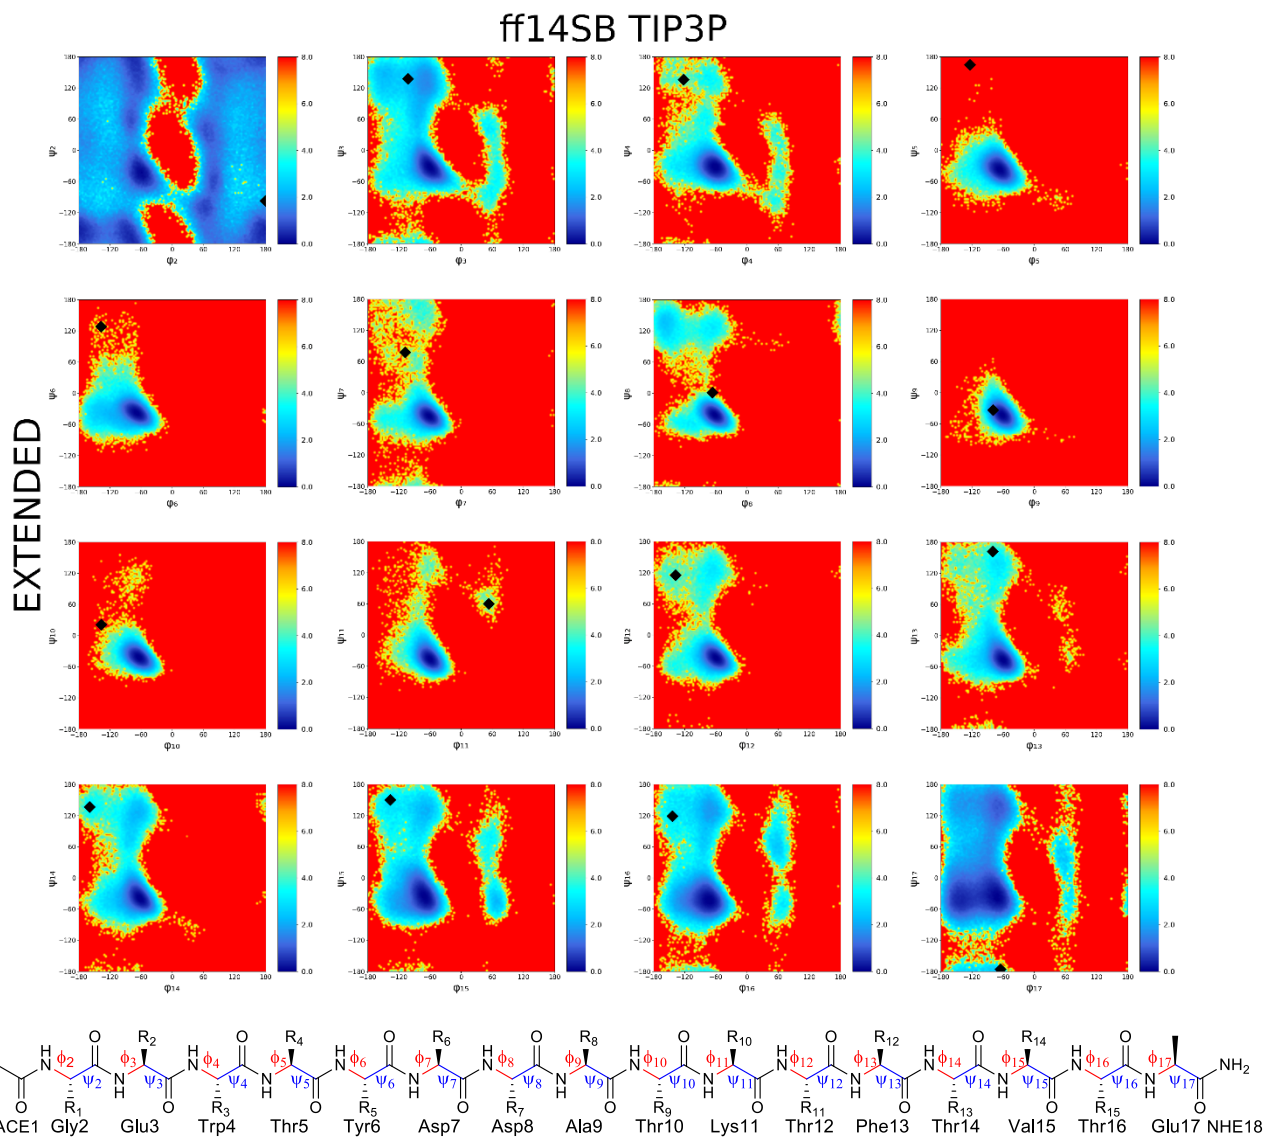

**Figure S46.** PMFs obtained from  $\phi$  and  $\psi$  dihedral distributions of B1 residues for the ff14SB/TIP3P combination from an extended conformation. PMFs are shown as heat maps (0.0 – 8.0 kcal/mol range) from dark blue to red. The native conformation's  $\phi$  and  $\psi$  angles are reported as black diamonds. B1 sequence and representation of  $\phi$  and  $\psi$  angles numbering are also shown.

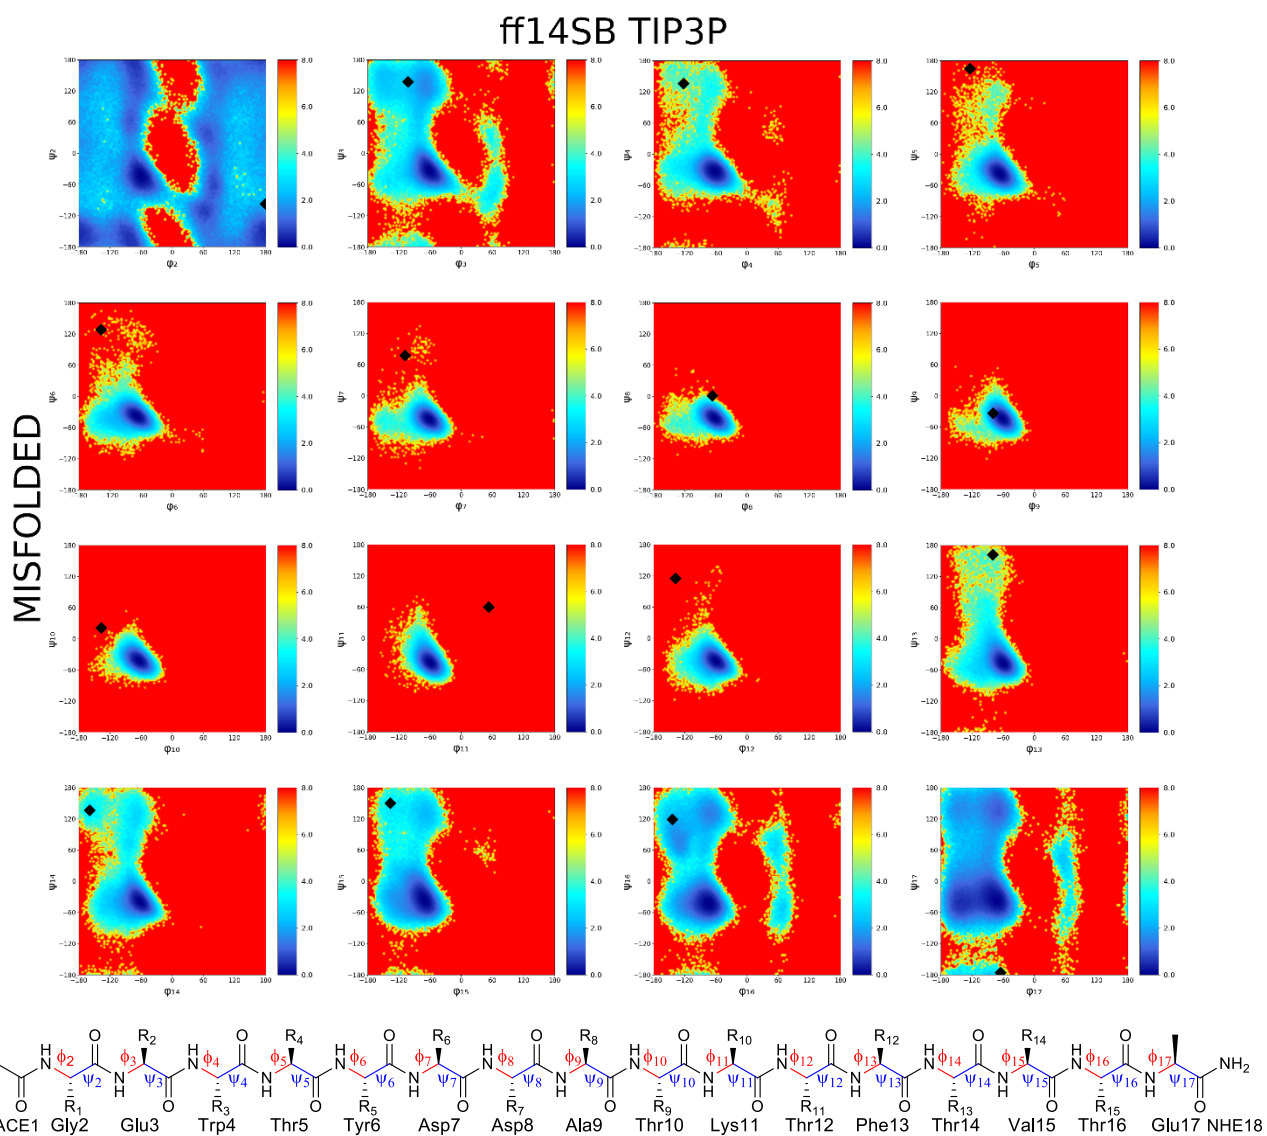

**Figure S47.** PMFs obtained from  $\phi$  and  $\psi$  dihedral distributions of B1 residues for the ff14SB/TIP3P combination from a misfolded conformation. PMFs are shown as heat maps (0.0 – 8.0 kcal/mol range) from dark blue to red. The native conformation's  $\phi$  and  $\psi$  angles are reported as black diamonds. B1 sequence and representation of  $\phi$  and  $\psi$  angles numbering are also shown.

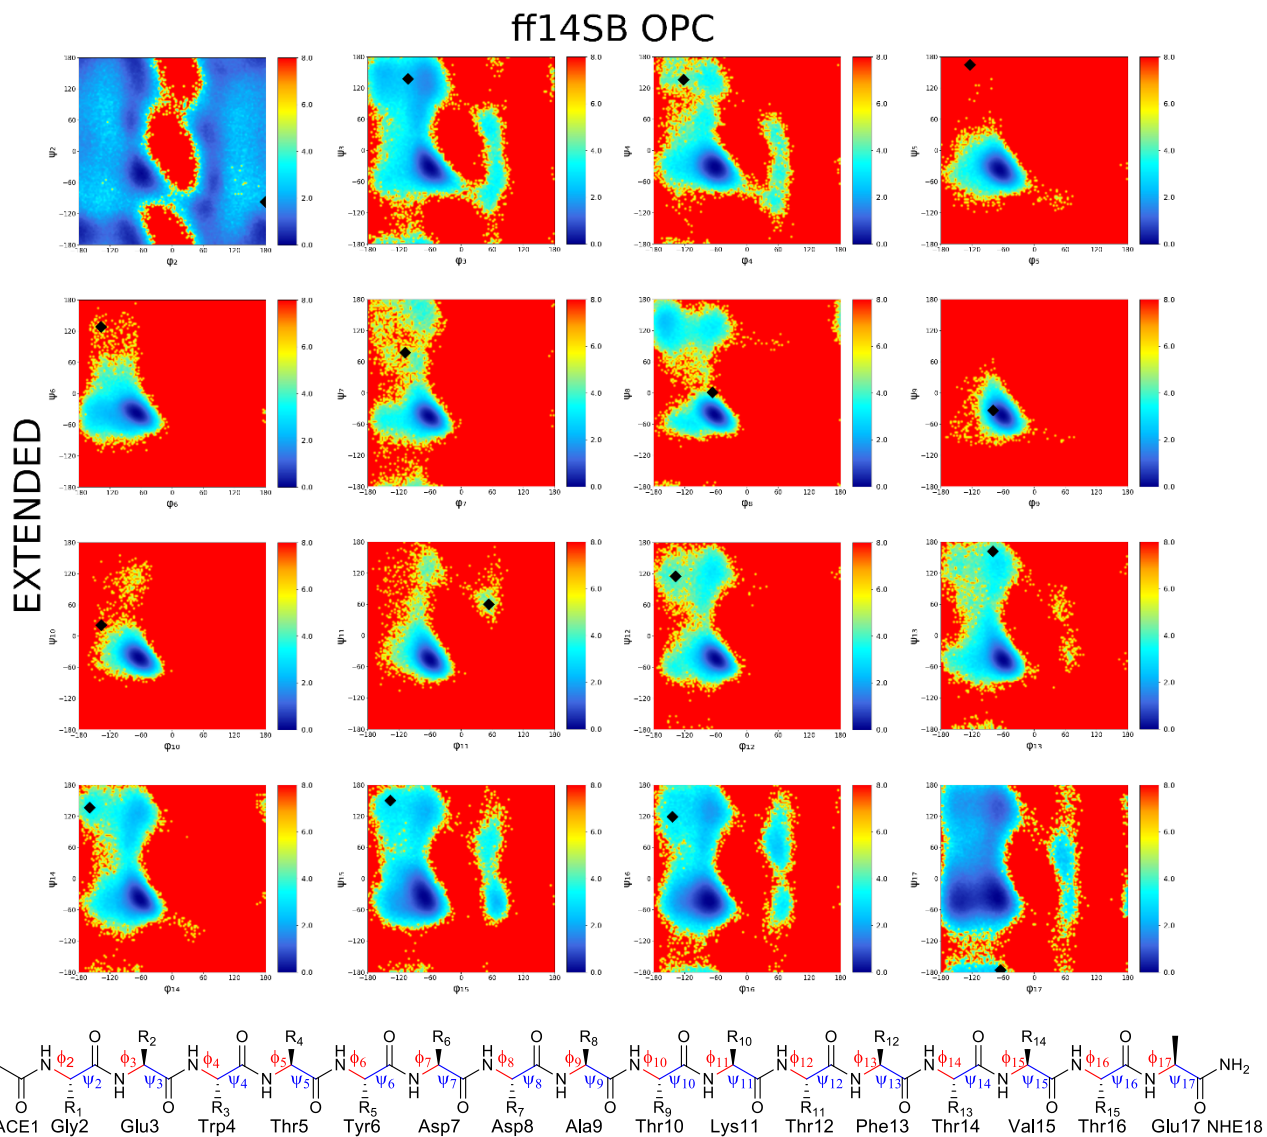

**Figure S48.** PMFs obtained from  $\phi$  and  $\psi$  dihedral distributions of B1 residues for the ff14SB/OPC combination from an extended conformation. PMFs are shown as heat maps (0.0 – 8.0 kcal/mol range) from dark blue to red. The native conformation's  $\phi$  and  $\psi$  angles are reported as black diamonds. B1 sequence and representation of  $\phi$  and  $\psi$  angles numbering are also shown.



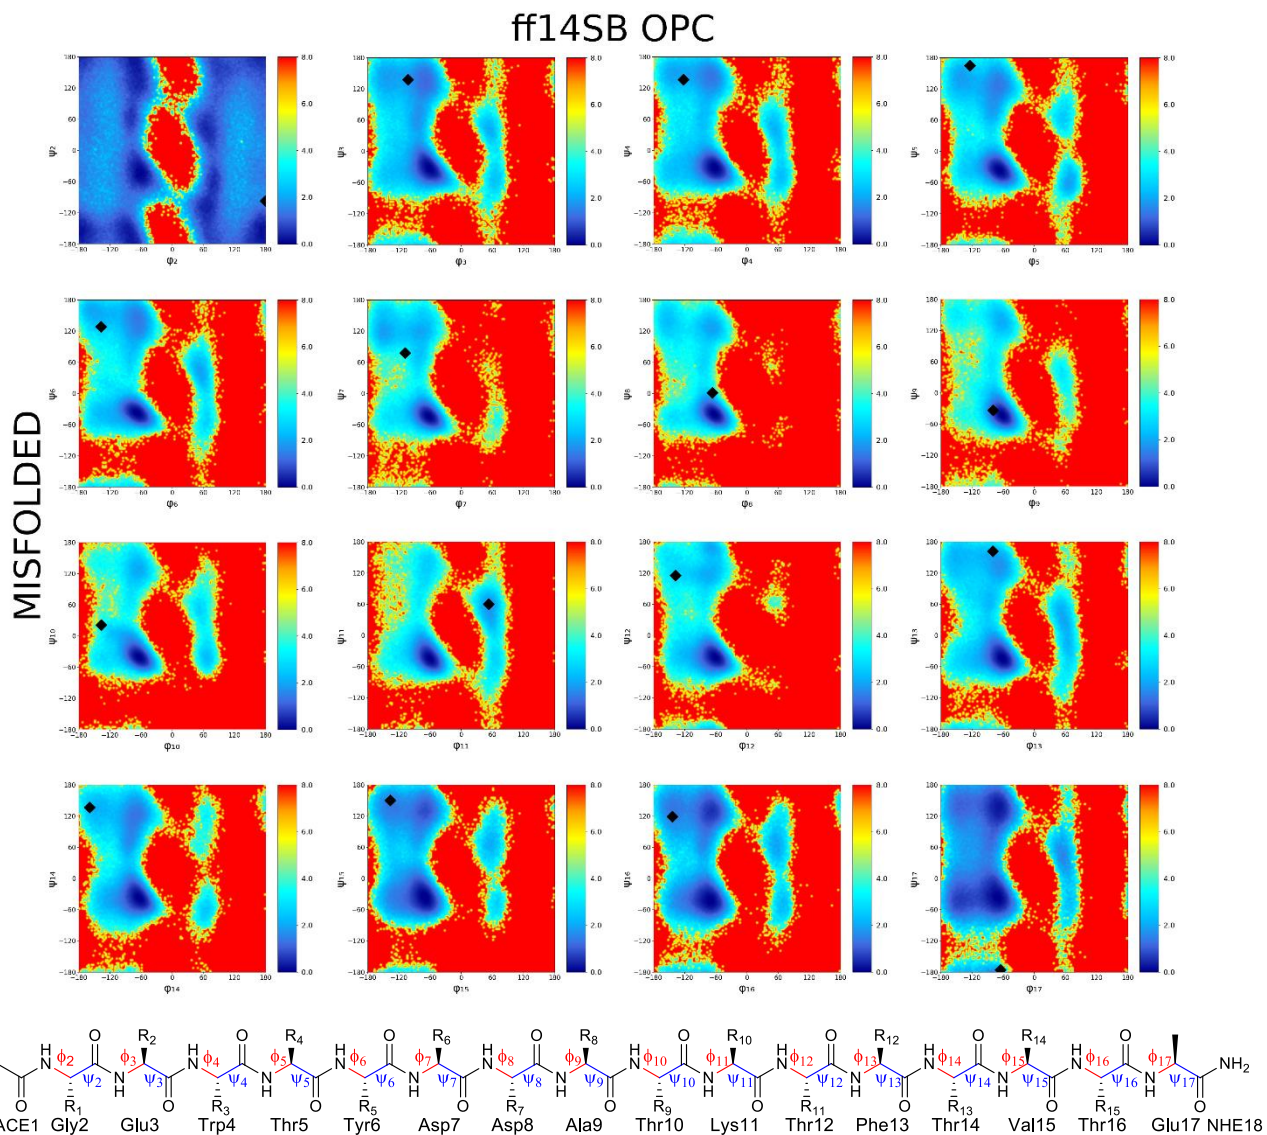

**Figure S49.** PMFs obtained from  $\phi$  and  $\psi$  dihedral distributions of B1 residues for the ff14SB/OPC combination from a misfolded conformation. PMFs are shown as heat maps (0.0 – 8.0 kcal/mol range) from dark blue to red. The native conformation's  $\phi$  and  $\psi$  angles are reported as black diamonds. B1 sequence and representation of  $\phi$  and  $\psi$  angles numbering are also shown.

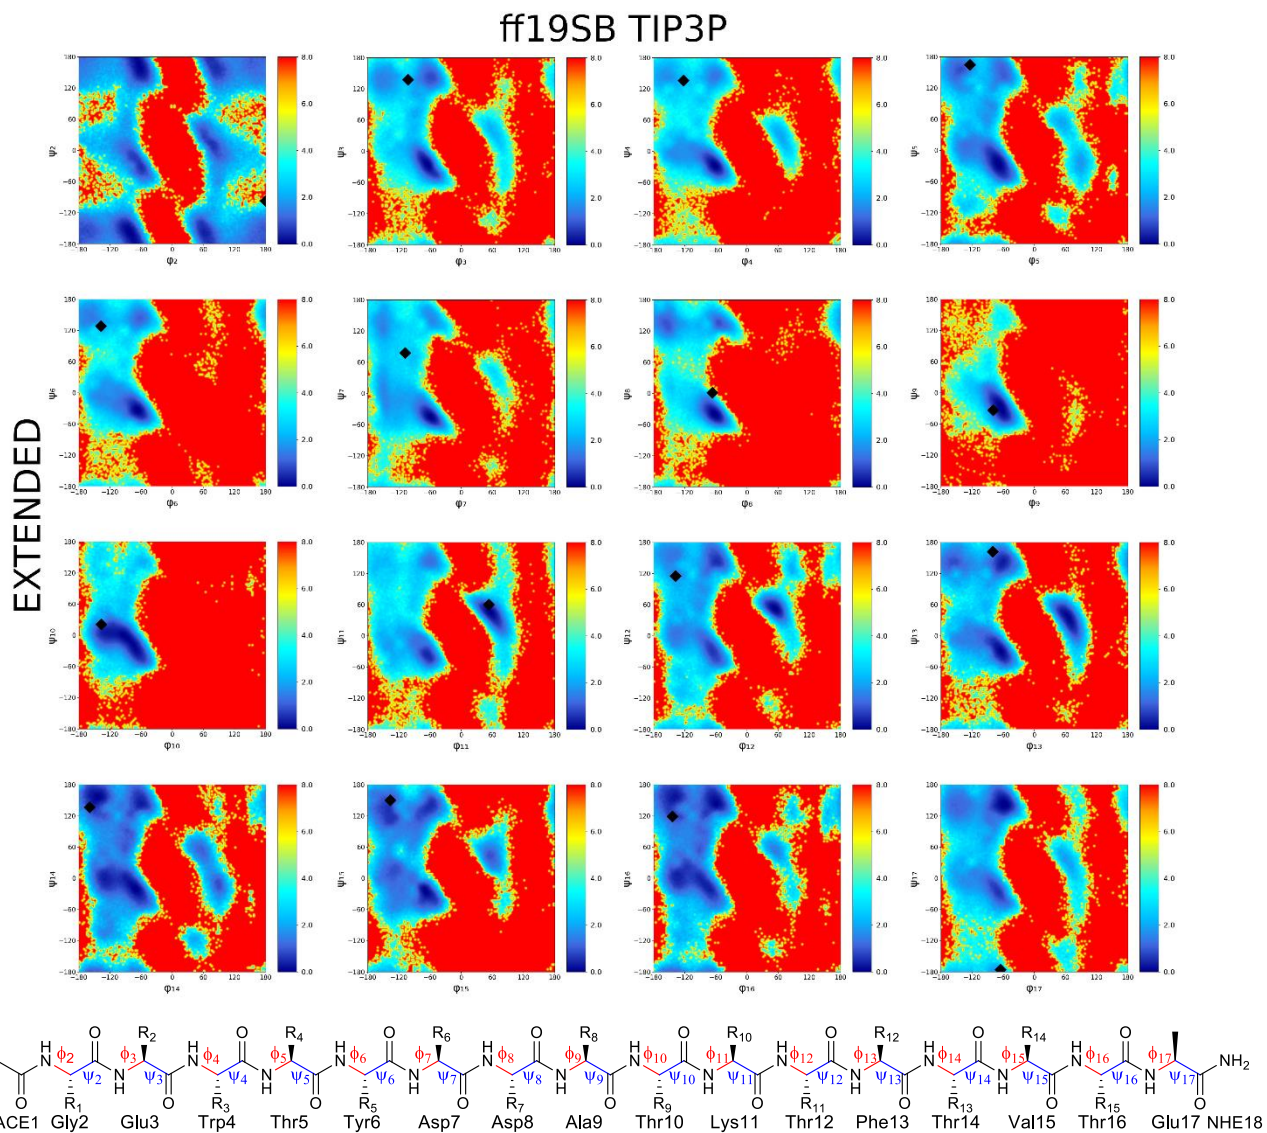

**Figure S50.** PMFs obtained from  $\phi$  and  $\psi$  dihedral distributions of B1 residues for the ff19SB/TIP3P combination from an extended conformation. PMFs are shown as heat maps (0.0 – 8.0 kcal/mol range) from dark blue to red. The native conformation's  $\phi$  and  $\psi$  angles are reported as black diamonds. B1 sequence and representation of  $\phi$  and  $\psi$  angles numbering are also shown.

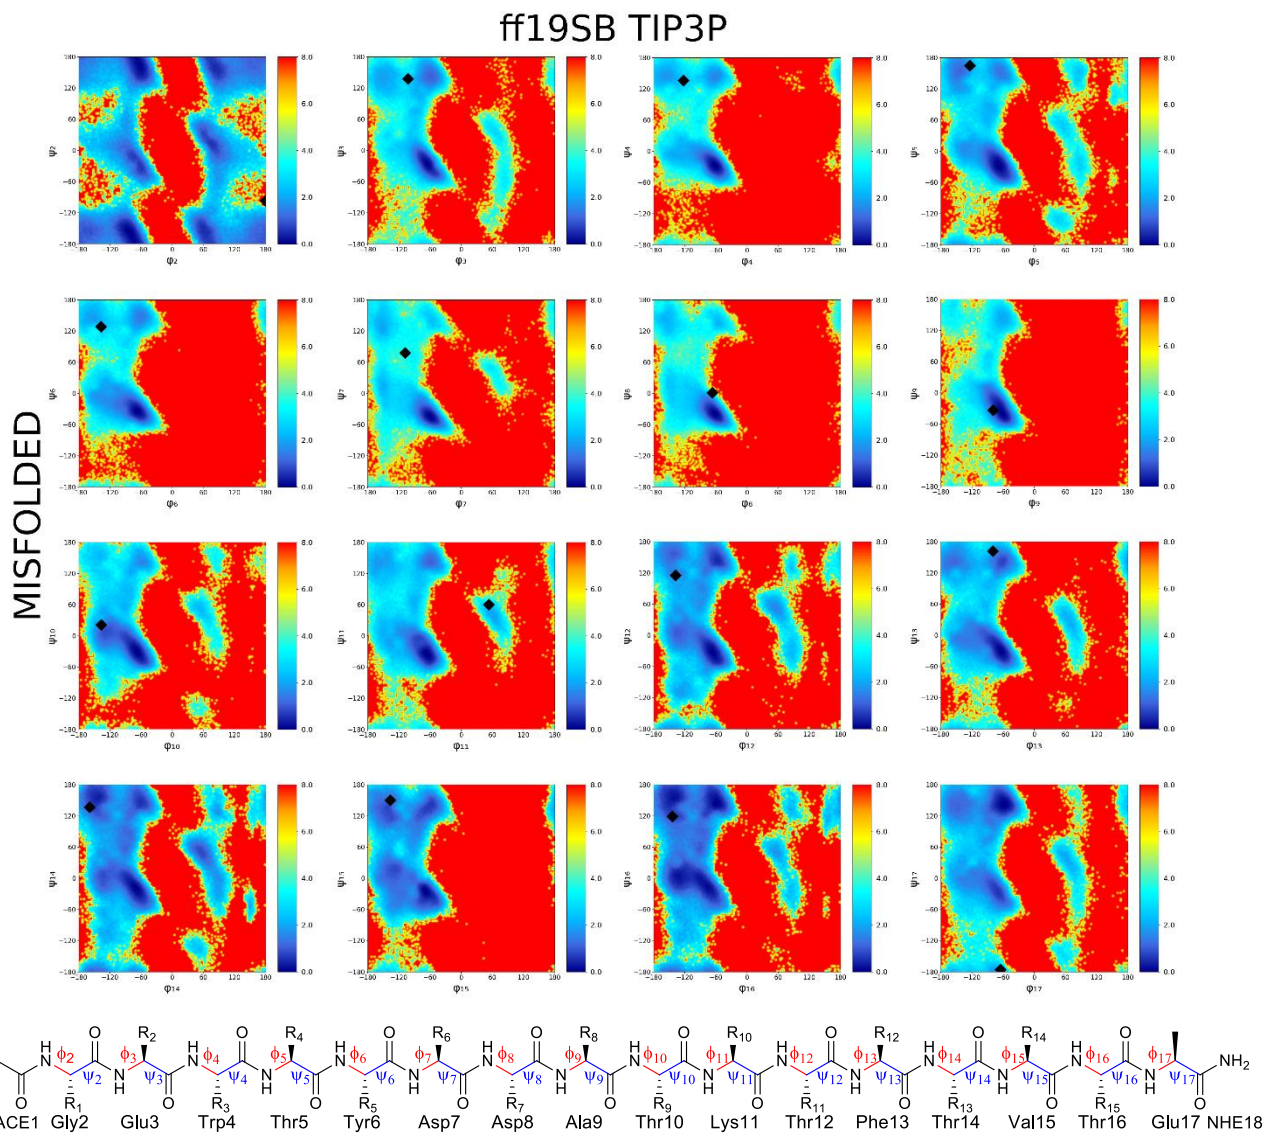

**Figure S51.** PMFs obtained from  $\phi$  and  $\psi$  dihedral distributions of B1 residues for the ff19SB/TIP3P combination from a misfolded conformation. PMFs are shown as heat maps (0.0 – 8.0 kcal/mol range) from dark blue to red. The native conformation's  $\phi$  and  $\psi$  angles are reported as black diamonds. B1 sequence and representation of  $\phi$  and  $\psi$  angles numbering are also shown.

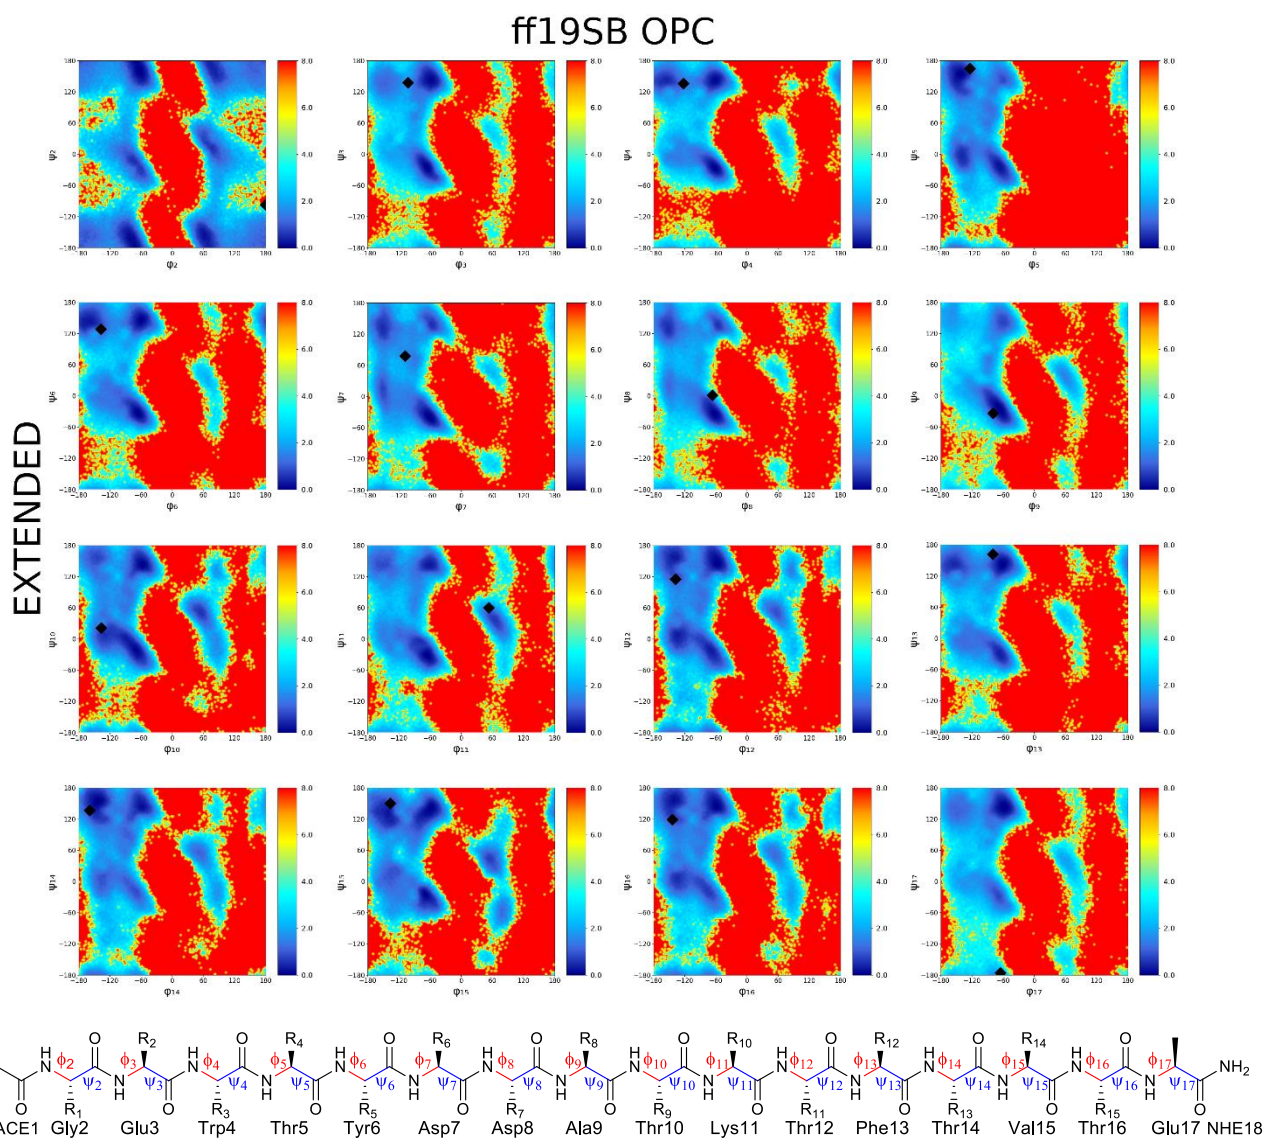

**Figure S52.** PMFs obtained from  $\phi$  and  $\psi$  dihedral distributions of B1 residues for the ff19SB/OPC combination from an extended conformation. PMFs are shown as heat maps (0.0 – 8.0 kcal/mol range) from dark blue to red. The native conformation's  $\phi$  and  $\psi$  angles are reported as black diamonds. B1 sequence and representation of  $\phi$  and  $\psi$  angles numbering are also shown.

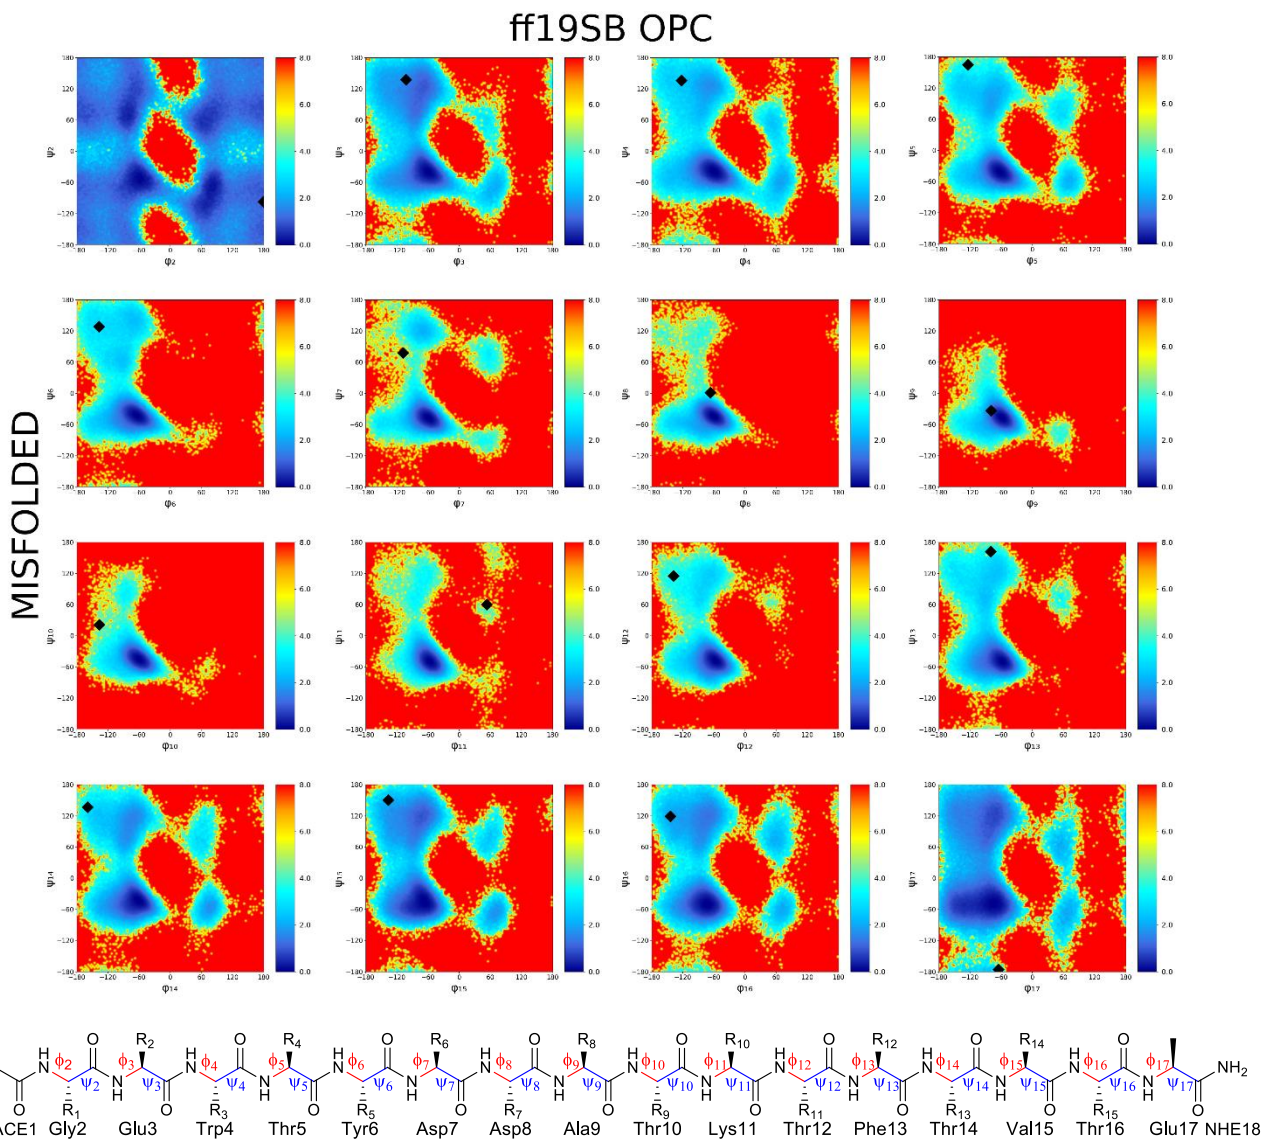

**Figure S53.** PMFs obtained from  $\phi$  and  $\psi$  dihedral distributions of B1 residues for the ff19SB/OPC combination from a misfolded conformation. PMFs are shown as heat maps (0.0 – 8.0 kcal/mol range) from dark blue to red. The native conformation's  $\phi$  and  $\psi$  angles are reported as black diamonds. B1 sequence and representation of  $\phi$  and  $\psi$  angles numbering are also shown.

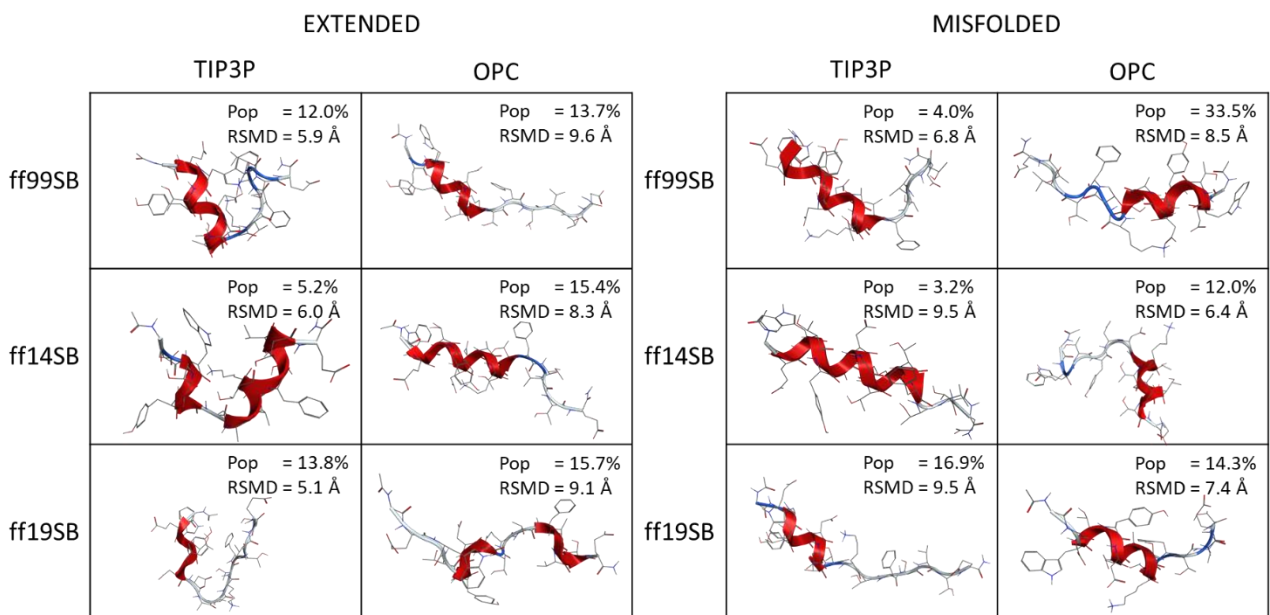

**Figure S54.** Representative conformation and population (pop%) of the second clusters from B1 trajectories. RMSD vs native structure are also shown.

**Table S5.** H-bond analyses from B1 trajectories. Only H-bonds involving the backbone are included in the table (donor N-H, acceptor C=O). Native H-bonds are highlighted in bold.

|              |       | NATIVE       |           |       |             |              |              |       |             |              |       |
|--------------|-------|--------------|-----------|-------|-------------|--------------|--------------|-------|-------------|--------------|-------|
| acceptor     |       | donor        |           |       | Distance    |              |              |       |             |              |       |
| <b>ASP7</b>  |       | <b>ALA9</b>  |           |       | <b>2.78</b> |              |              |       |             |              |       |
| <b>ASP7</b>  |       | <b>LYS11</b> |           |       | <b>2.98</b> |              |              |       |             |              |       |
| <b>GLU3</b>  |       | <b>THR16</b> |           |       | <b>3.06</b> |              |              |       |             |              |       |
| <b>THR12</b> |       | <b>ASP7</b>  |           |       | <b>3.08</b> |              |              |       |             |              |       |
| <b>ASP7</b>  |       | <b>THR10</b> |           |       | <b>3.18</b> |              |              |       |             |              |       |
| <b>ASP7</b>  |       | <b>THR12</b> |           |       | <b>3.22</b> |              |              |       |             |              |       |
| <b>THR5</b>  |       | <b>THR14</b> |           |       | <b>3.33</b> |              |              |       |             |              |       |
| <b>THR16</b> |       | <b>GLU3</b>  |           |       | <b>3.37</b> |              |              |       |             |              |       |
| <b>THR10</b> |       | <b>THR12</b> |           |       | <b>3.38</b> |              |              |       |             |              |       |
| <b>TYR6</b>  |       | <b>ASP8</b>  |           |       | <b>3.59</b> |              |              |       |             |              |       |
| <b>ASP8</b>  |       | <b>THR10</b> |           |       | <b>3.68</b> |              |              |       |             |              |       |
| <b>THR12</b> |       | <b>THR14</b> |           |       | <b>3.95</b> |              |              |       |             |              |       |
| <b>GLY2</b>  |       | <b>TRP4</b>  |           |       | <b>4.04</b> |              |              |       |             |              |       |
| <b>ASP8</b>  |       | <b>LYS11</b> |           |       | <b>4.29</b> |              |              |       |             |              |       |
| <b>ALA9</b>  |       | <b>LYS11</b> |           |       | <b>4.32</b> |              |              |       |             |              |       |
| <b>GLU3</b>  |       | <b>THR5</b>  |           |       | <b>4.35</b> |              |              |       |             |              |       |
| <b>LYS11</b> |       | <b>PHE13</b> |           |       | <b>4.46</b> |              |              |       |             |              |       |
| ff99SB OPC   |       |              |           |       |             | ff99SB TIP3P |              |       |             |              |       |
| EXTENDED     |       |              | MISFOLDED |       |             | EXTENDED     |              |       | MISFOLDED   |              |       |
| acceptor     | donor | occ%         | acceptor  | donor | occ%        | acceptor     | donor        | occ%  | acceptor    | donor        | occ%  |
| ASP8         | THR12 | 23.70        | ALA9      | PHE13 | 24.34       | <b>ASP7</b>  | <b>LYS11</b> | 43.99 | <b>ASP7</b> | <b>LYS11</b> | 48.48 |

|             |              |       |
|-------------|--------------|-------|
| TYR6        | THR10        | 21.02 |
| <b>ASP7</b> | <b>LYS11</b> | 20.94 |
| ALA9        | PHE13        | 18.57 |
| THR5        | ALA9         | 13.73 |
| THR10       | THR14        | 10.03 |
| GLU3        | ASP7         | 9.80  |
| TRP4        | ASP8         | 8.05  |
| PHE13       | GLU17        | 6.38  |
| LYS11       | VAL15        | 6.28  |
| ALA9        | THR14        | 5.52  |
| GLU3        | TYR6         | 5.51  |
| <b>ASP8</b> | <b>LYS11</b> | 5.31  |
| GLY2        | THR5         | 5.04  |

|             |              |       |
|-------------|--------------|-------|
| TYR6        | THR10        | 22.35 |
| ASP8        | THR12        | 21.02 |
| <b>ASP7</b> | <b>LYS11</b> | 19.94 |
| TRP4        | ASP8         | 13.16 |
| THR5        | ALA9         | 12.28 |
| THR10       | THR14        | 12.16 |
| GLU3        | ASP7         | 10.75 |
| LYS11       | VAL15        | 9.02  |
| PHE13       | GLU17        | 8.40  |
| GLY2        | THR5         | 7.70  |
| GLY2        | TYR6         | 5.49  |
| ALA9        | THR12        | 5.23  |

|             |              |       |
|-------------|--------------|-------|
| TYR6        | THR10        | 34.59 |
| ASP8        | THR12        | 33.73 |
| ALA9        | PHE13        | 32.19 |
| GLU3        | ASP7         | 27.93 |
| TRP4        | ASP8         | 25.80 |
| THR5        | ALA9         | 24.74 |
| THR10       | THR14        | 18.67 |
| PHE13       | GLU17        | 17.70 |
| LYS11       | VAL15        | 15.99 |
| GLY2        | TYR6         | 14.25 |
| GLY2        | THR5         | 12.01 |
| <b>ASP7</b> | <b>THR12</b> | 8.92  |
| GLU3        | TYR6         | 8.41  |
| THR12       | THR16        | 6.61  |

|       |       |       |
|-------|-------|-------|
| ALA9  | PHE13 | 46.09 |
| ASP8  | THR12 | 45.21 |
| TYR6  | THR10 | 45.01 |
| GLU3  | ASP7  | 31.71 |
| TRP4  | ASP8  | 31.07 |
| THR5  | ALA9  | 30.43 |
| THR10 | THR14 | 29.85 |
| LYS11 | VAL15 | 24.85 |
| PHE13 | GLU17 | 24.25 |
| GLY2  | THR5  | 12.05 |
| GLY2  | TYR6  | 11.81 |
| GLU3  | TYR6  | 10.96 |
| THR12 | THR16 | 10.90 |
| THR12 | GLU17 | 5.61  |
| PHE13 | THR16 | 5.08  |

| ff14SB OPC  |              |       |             |              |       |
|-------------|--------------|-------|-------------|--------------|-------|
| EXTENDED    |              |       | MISFOLDED   |              |       |
| acceptor    | donor        | occ%  | acceptor    | donor        | occ%  |
| <b>ASP7</b> | <b>LYS11</b> | 50.91 | ALA9        | PHE13        | 36.34 |
| ALA9        | PHE13        | 48.16 | <b>ASP7</b> | <b>LYS11</b> | 35.76 |
| TYR6        | THR10        | 46.74 | ASP8        | THR12        | 33.62 |
| ASP8        | THR12        | 46.41 | TYR6        | THR10        | 32.01 |
| THR5        | ALA9         | 33.42 | THR10       | THR14        | 25.41 |
| THR10       | THR14        | 33.24 | THR5        | ALA9         | 21.26 |
| TRP4        | ASP8         | 28.98 | LYS11       | VAL15        | 20.82 |
| GLU3        | ASP7         | 26.93 | PHE13       | GLU17        | 18.83 |
| LYS11       | VAL15        | 24.34 | TRP4        | ASP8         | 18.30 |
| PHE13       | GLU17        | 23.66 | GLU3        | ASP7         | 17.30 |
| GLY2        | THR5         | 20.68 | THR12       | THR16        | 11.90 |
| THR12       | THR16        | 14.24 | GLY2        | THR5         | 10.97 |
| GLY2        | TYR6         | 11.73 | GLY2        | TYR6         | 9.29  |
| GLU3        | TYR6         | 7.91  | GLU3        | TYR6         | 5.30  |

| ff14SB TIP3P |              |       |             |              |       |
|--------------|--------------|-------|-------------|--------------|-------|
| EXTENDED     |              |       | MISFOLDED   |              |       |
| acceptor     | donor        | occ%  | acceptor    | donor        | occ%  |
| <b>ASP7</b>  | <b>LYS11</b> | 54.92 | <b>ASP7</b> | <b>LYS11</b> | 58.56 |
| ALA9         | PHE13        | 54.72 | ALA9        | PHE13        | 57.31 |
| ASP8         | THR12        | 54.03 | ASP8        | THR12        | 55.66 |
| TYR6         | THR10        | 46.93 | TYR6        | THR10        | 51.25 |
| PHE13        | GLU17        | 43.61 | THR10       | THR14        | 41.59 |
| THR10        | THR14        | 41.88 | PHE13       | GLU17        | 39.88 |
| LYS11        | VAL15        | 36.09 | THR5        | ALA9         | 38.29 |
| THR5         | ALA9         | 34.81 | LYS11       | VAL15        | 37.43 |
| TRP4         | ASP8         | 34.22 | TRP4        | ASP8         | 35.49 |
| GLU3         | ASP7         | 32.97 | GLU3        | ASP7         | 34.04 |
| THR12        | THR16        | 22.82 | THR12       | THR16        | 22.97 |
| GLY2         | THR5         | 17.65 | GLY2        | TYR6         | 16.03 |
| GLY2         | TYR6         | 14.09 | GLY2        | THR5         | 16.00 |
| GLU3         | TYR6         | 9.99  | GLU3        | TYR6         | 8.67  |
| PHE13        | THR16        | 5.75  | ACE1        | THR5         | 5.71  |
|              |              |       | PHE13       | THR16        | 5.66  |

| ff19SB OPC  |              |      |             |              |       |
|-------------|--------------|------|-------------|--------------|-------|
| EXTENDED    |              |      | MISFOLDED   |              |       |
| acceptor    | donor        | occ% | acceptor    | donor        | occ%  |
| GLY2        | THR5         | 6.51 | ALA9        | PHE13        | 47.92 |
| <b>ASP7</b> | <b>THR10</b> | 5.01 | <b>ASP7</b> | <b>LYS11</b> | 46.64 |
|             |              |      | ASP8        | THR12        | 45.65 |
|             |              |      | TYR6        | THR10        | 41.59 |
|             |              |      | THR10       | THR14        | 35.62 |
|             |              |      | LYS11       | VAL15        | 28.43 |
|             |              |      | THR5        | ALA9         | 27.90 |
|             |              |      | TRP4        | ASP8         | 26.64 |
|             |              |      | GLU3        | ASP7         | 23.23 |

| ff19SB TIP3P |              |       |             |              |       |
|--------------|--------------|-------|-------------|--------------|-------|
| EXTENDED     |              |       | MISFOLDED   |              |       |
| acceptor     | donor        | occ%  | acceptor    | donor        | occ%  |
| GLY2         | THR5         | 15.31 | <b>ASP7</b> | <b>LYS11</b> | 25.16 |
| TYR6         | THR10        | 15.07 | TYR6        | THR10        | 24.81 |
| THR5         | ALA9         | 14.54 | GLY2        | THR5         | 19.04 |
| <b>ASP7</b>  | <b>LYS11</b> | 14.16 | THR5        | ALA9         | 18.78 |
| <b>ASP7</b>  | <b>THR12</b> | 12.26 | ASP8        | THR12        | 18.51 |
| ASP8         | LYS11        | 12.23 | GLU3        | ASP7         | 16.70 |
| GLU3         | ASP7         | 11.55 | ALA9        | PHE13        | 15.98 |
| <b>ASP8</b>  | <b>THR12</b> | 11.12 | TRP4        | ASP8         | 15.57 |
| THR10        | THR14        | 10.58 | GLU3        | TYR6         | 10.86 |

|       |       |       |      |       |      |             |              |      |
|-------|-------|-------|------|-------|------|-------------|--------------|------|
| PHE13 | GLU17 | 21.77 | TRP4 | ASP8  | 9.63 | <b>ASP7</b> | <b>THR10</b> | 7.58 |
| THR12 | THR16 | 13.94 | GLU3 | TYR6  | 7.71 | THR10       | THR14        | 6.48 |
| GLY2  | TYR6  | 11.76 | ALA9 | PHE13 | 5.96 |             |              |      |
| THR12 | GLU17 | 10.28 |      |       |      |             |              |      |
| GLU3  | TYR6  | 7.11  |      |       |      |             |              |      |
| GLY2  | THR5  | 6.56  |      |       |      |             |              |      |
| THR10 | VAL15 | 5.76  |      |       |      |             |              |      |
| TYR6  | LYS11 | 5.57  |      |       |      |             |              |      |

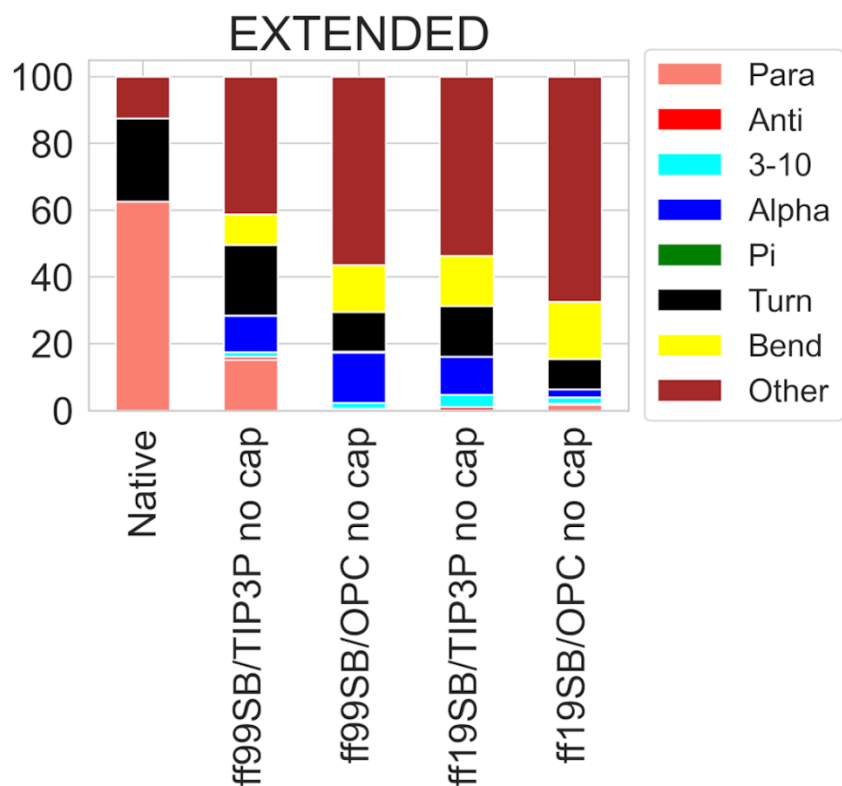

**Figure S55.** DSSP analysis of B1 uncapped trajectories from extended conformation. Data are reported as percentage of the distributions of all the residues considering the last 500 ns frames.



## ff99SB TIP3P

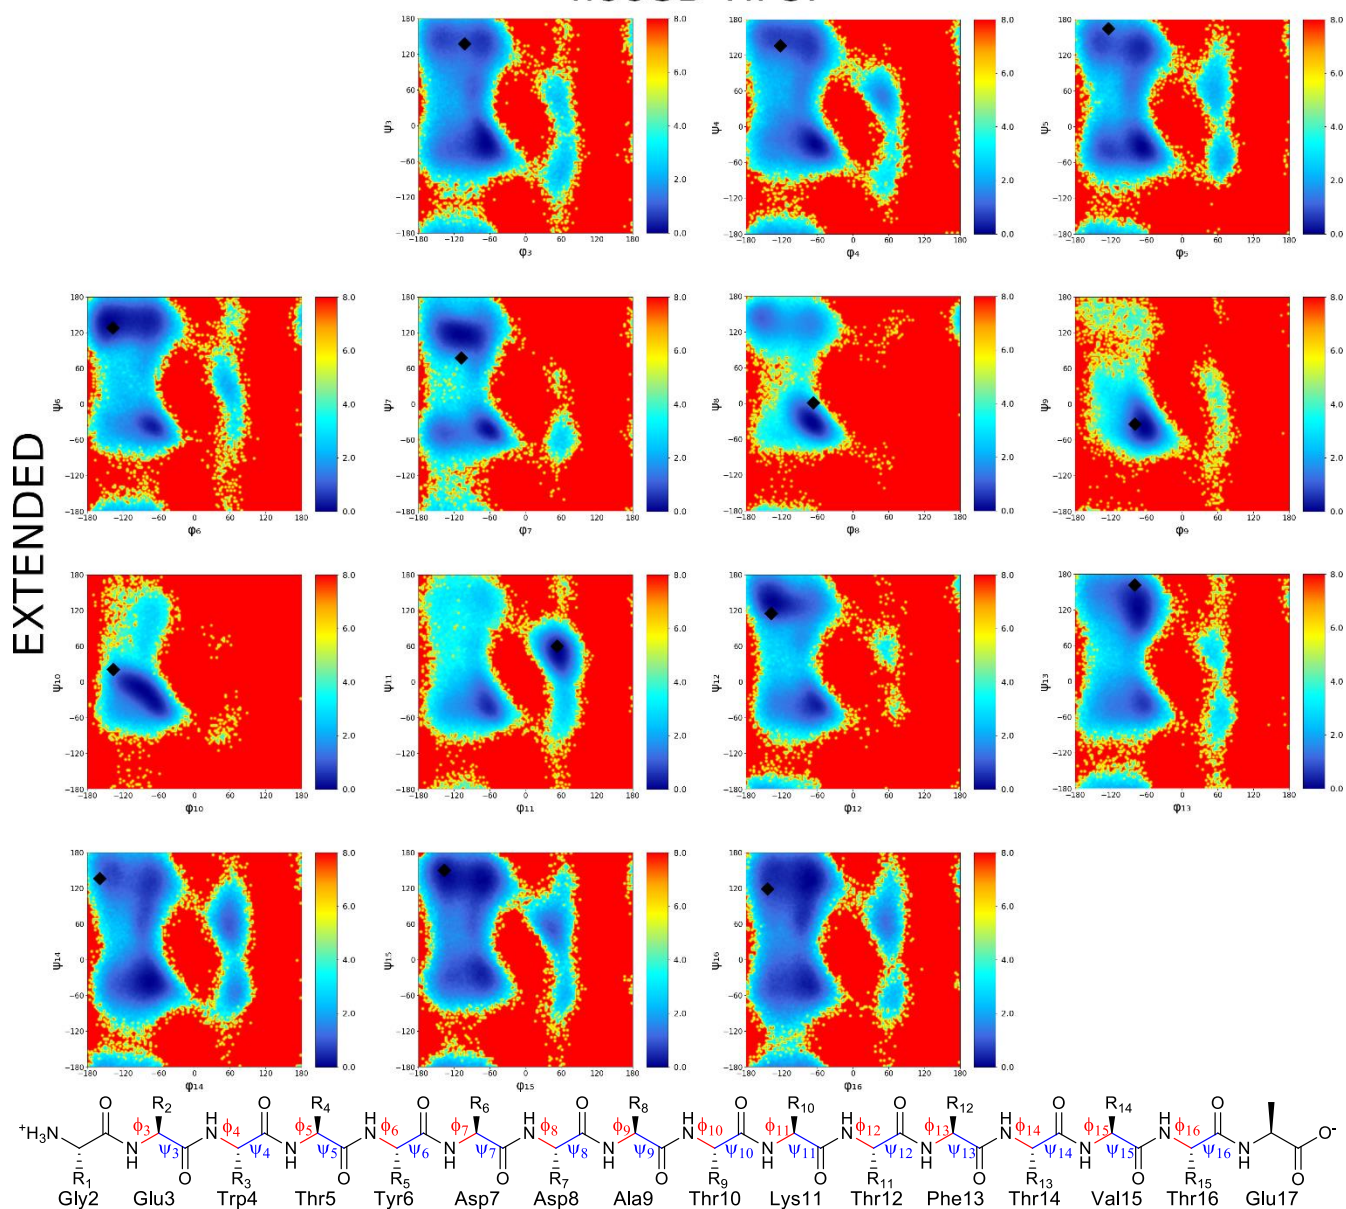

**Figure S56.** PMFs obtained from  $\phi$  and  $\psi$  dihedral distributions of B1 uncapped residues for the ff99SB/TIP3P combination from extended (top panel) and misfolded (bottom panels) conformations. PMFs are shown as heat maps (0.0 – 8.0 kcal/mol range) from dark blue to red. The native conformation's  $\phi$  and  $\psi$  angles are reported as black diamonds. B1 uncapped sequence and representation of  $\phi$  and  $\psi$  angles numbering are also shown.

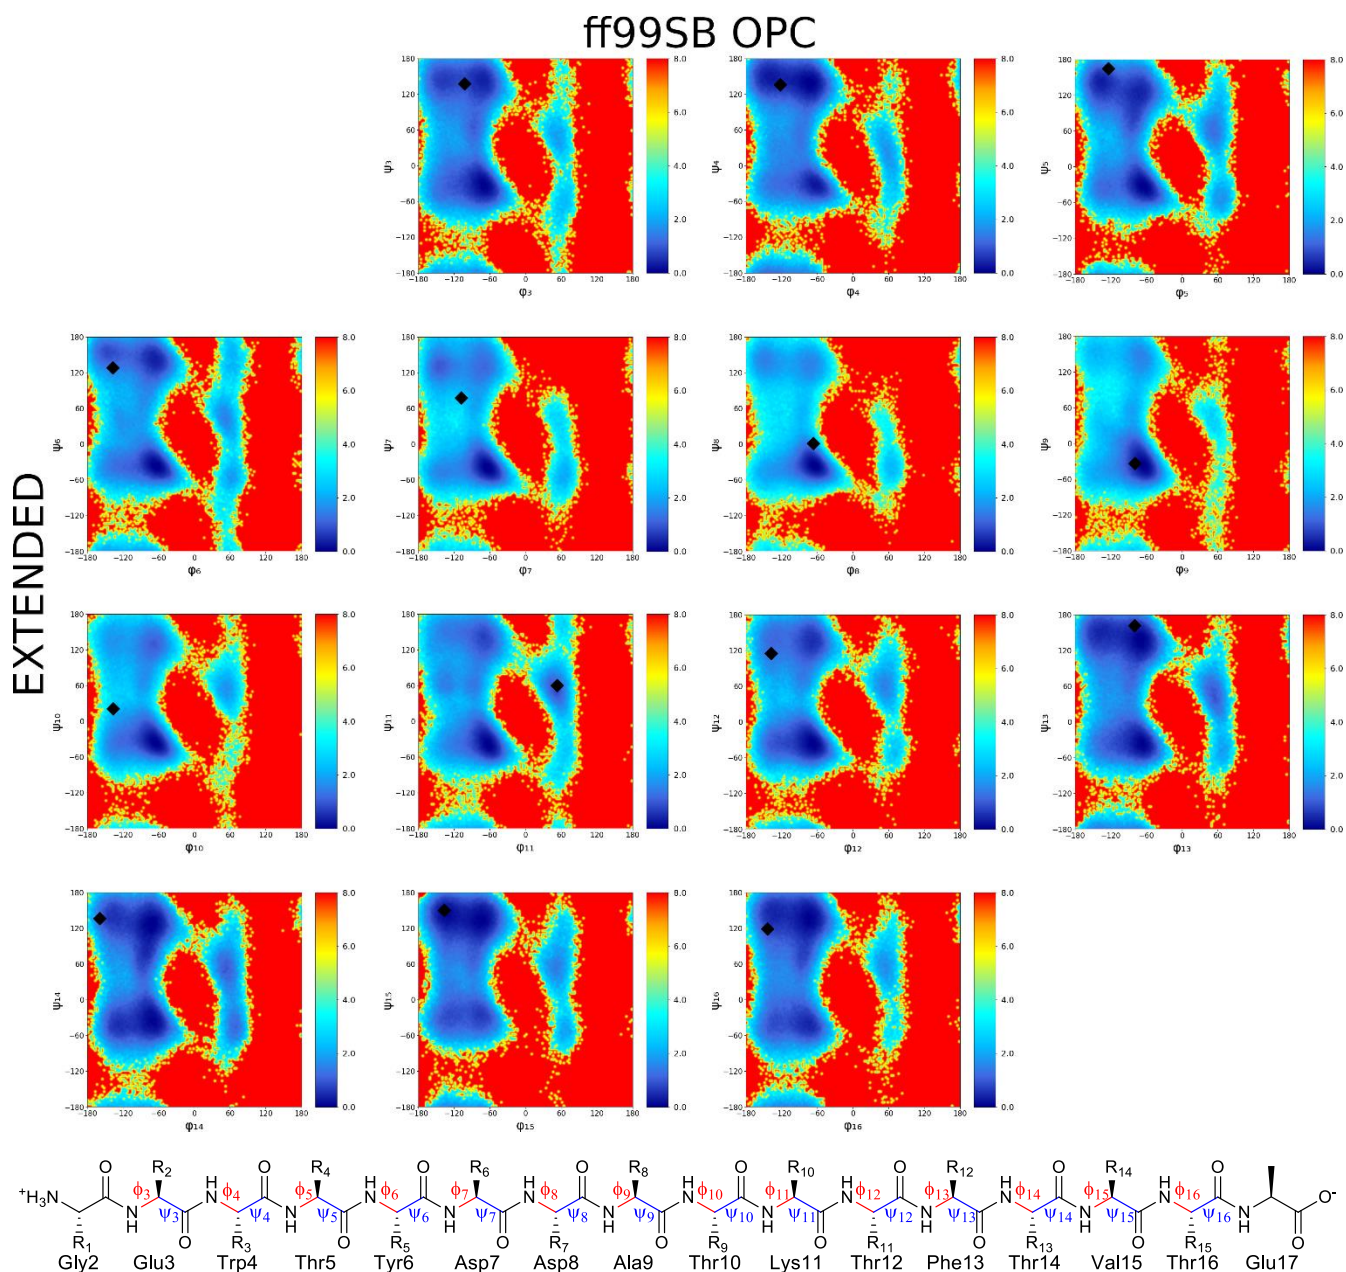

**Figure S57.** PMFs obtained from  $\phi$  and  $\psi$  dihedral distributions of B1 uncapped residues for the ff99SB/OPC combination from extended (top panel) and misfolded (bottom panels) conformations. PMFs are shown as heat maps (0.0 – 8.0 kcal/mol range) from dark blue to red. The native conformation's  $\phi$  and  $\psi$  angles are reported as black diamonds. B1 uncapped sequence and representation of  $\phi$  and  $\psi$  angles numbering are also shown.

## ff19SB TIP3P

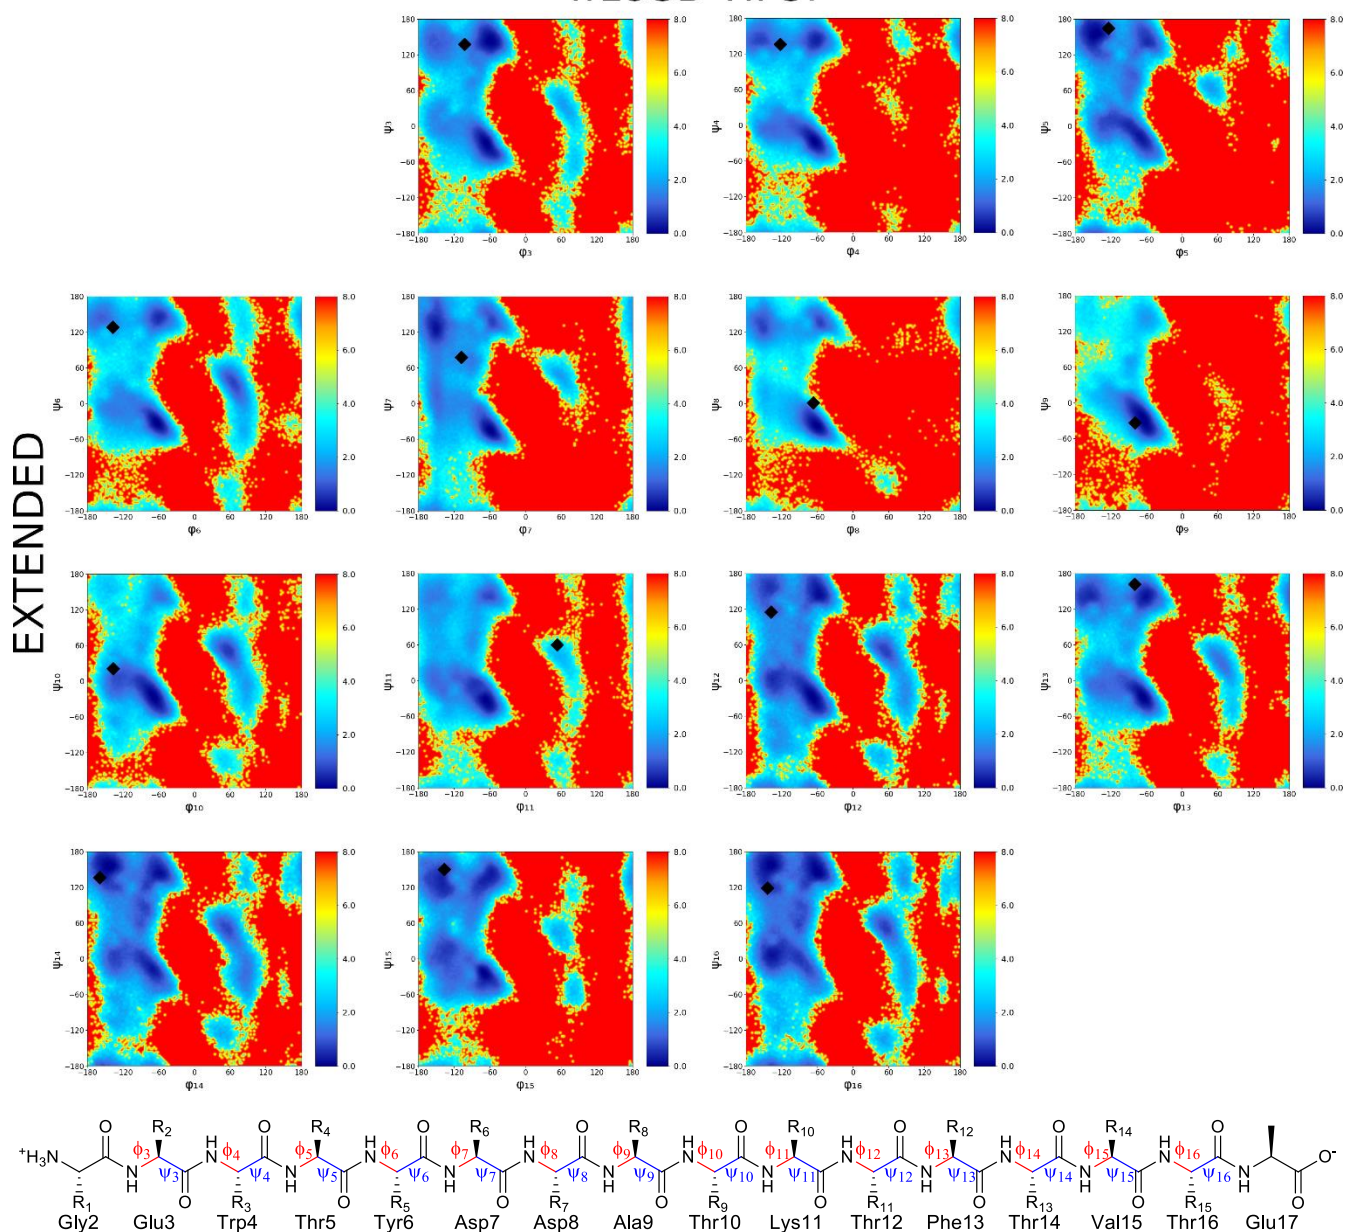

**Figure S58.** PMFs obtained from  $\phi$  and  $\psi$  dihedral distributions of B1 uncapped residues for the ff99SB/TIP3P combination from extended (top panel) and misfolded (bottom panels) conformations. PMFs are shown as heat maps (0.0 – 8.0 kcal/mol range) from dark blue to red. The native conformation's  $\phi$  and  $\psi$  angles are reported as black diamonds. B1 uncapped sequence and representation of  $\phi$  and  $\psi$  angles numbering are also shown.

## ff19SB OPC

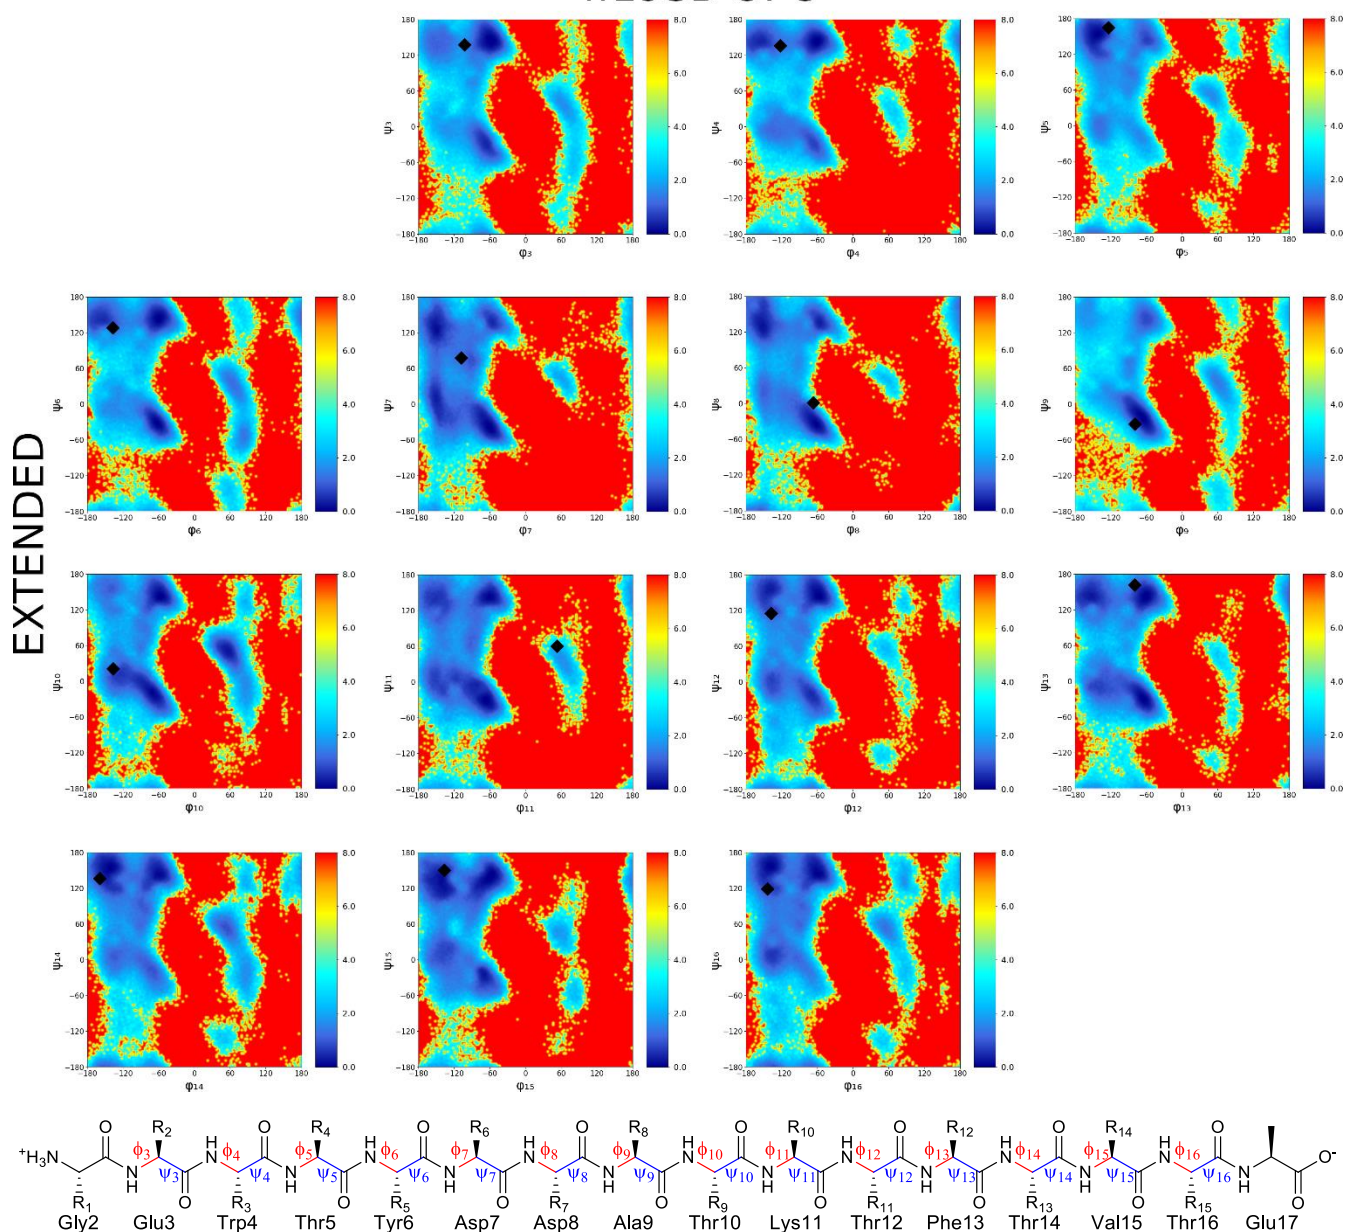

**Figure S59.** PMFs obtained from  $\phi$  and  $\psi$  dihedral distributions of B1 uncapped residues for the ff19SB/OPC combination from extended (top panel) and misfolded (bottom panels) conformations. PMFs are shown as heat maps (0.0 – 8.0 kcal/mol range) from dark blue to red. The native conformation's  $\phi$  and  $\psi$  angles are reported as black diamonds. B1 uncapped sequence and representation of  $\phi$  and  $\psi$  angles numbering are also shown.

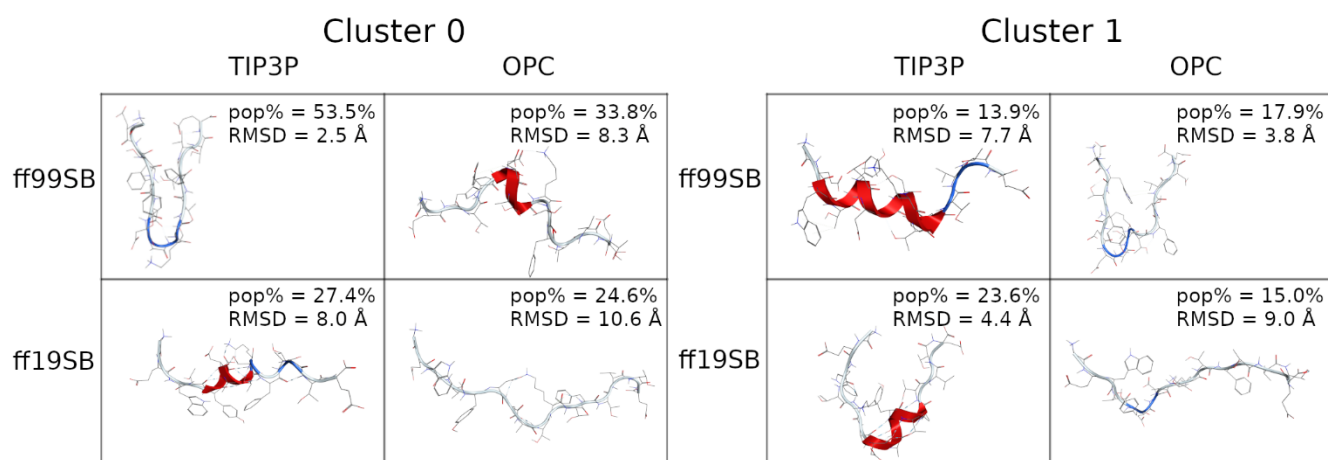

**Figure S60.** Representative conformation of the main and second clusters from B1 uncapped trajectories. Population (pop%) and RMSD vs native structure are also shown in the figure.

**Table S6.** H-bond analyses from B1 uncapped trajectories. Only H-bonds involving the backbone are included in the table (donor N-H, acceptor C=O). Native H-bonds are highlighted in bold.

| ff99SB OPC  |              |       | ff99SB TIP3P |              |       | ff19SB OPC  |              |      | ff19SB TIP3P |              |       |
|-------------|--------------|-------|--------------|--------------|-------|-------------|--------------|------|--------------|--------------|-------|
| EXTENDED    |              |       | EXTENDED     |              |       | EXTENDED    |              |      | EXTENDED     |              |       |
| acceptor    | donor        | occ%  | acceptor     | donor        | occ%  | acceptor    | donor        | occ% | acceptor     | donor        | occ%  |
| <b>ASP7</b> | <b>LYS11</b> | 15.63 | <b>THR12</b> | <b>ASP7</b>  | 33.31 | <b>ASP8</b> | <b>LYS11</b> | 5    | <b>ASP7</b>  | <b>LYS11</b> | 13.68 |
| TYR6        | THR10        | 13.4  | <b>THR5</b>  | <b>THR14</b> | 25.12 |             |              |      | ASP8         | THR12        | 12.69 |
| ASP8        | THR12        | 11.24 | <b>ASP7</b>  | <b>THR12</b> | 17.09 |             |              |      | ALA9         | PHE13        | 8.22  |
| ALA9        | PHE13        | 11.05 | <b>ASP7</b>  | <b>LYS11</b> | 15.83 |             |              |      | <b>ASP8</b>  | <b>LYS11</b> | 7.85  |
| THR5        | ALA9         | 7.97  | ASP8         | THR12        | 12.2  |             |              |      | TYR6         | THR10        | 7.18  |
| THR10       | THR14        | 5.29  | ALA9         | PHE13        | 10.78 |             |              |      | <b>ASP7</b>  | <b>THR10</b> | 6.5   |
| TRP4        | ASP8         | 5     | <b>ASP8</b>  | <b>LYS11</b> | 8.42  |             |              |      | THR5         | ALA9         | 5.45  |
|             |              |       | TYR6         | THR10        | 6.36  |             |              |      |              |              |       |
|             |              |       | THR14        | THR5         | 5.64  |             |              |      |              |              |       |
|             |              |       | THR10        | THR14        | 5.33  |             |              |      |              |              |       |
|             |              |       | TRP4         | ASP8         | 5     |             |              |      |              |              |       |

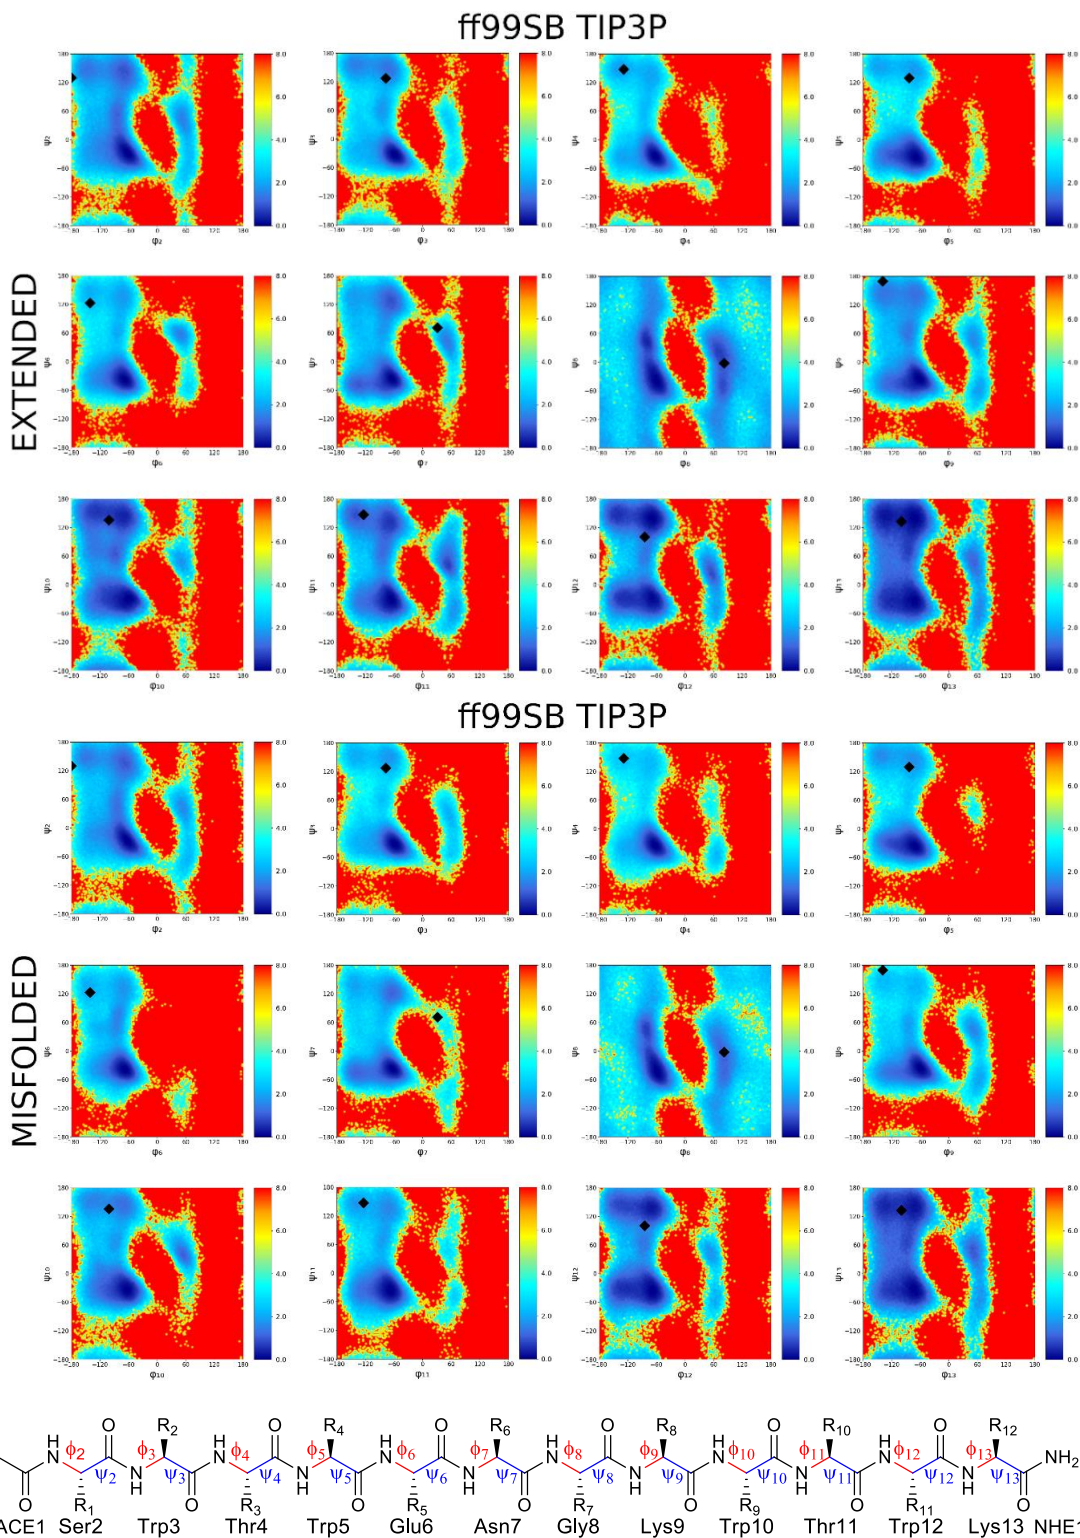

**Figure S61.** PMFs obtained from  $\phi$  and  $\psi$  dihedral distributions of B2 residues for the ff99SB/TIP3P combination from extended (top panel) and misfolded (bottom panels) conformations. PMFs are shown as heat maps (0.0 – 8.0 kcal/mol range) from dark blue to red. The native conformation's  $\phi$  and  $\psi$  angles are reported as black diamonds. B2 sequence and representation of  $\phi$  and  $\psi$  angles numbering are also shown.

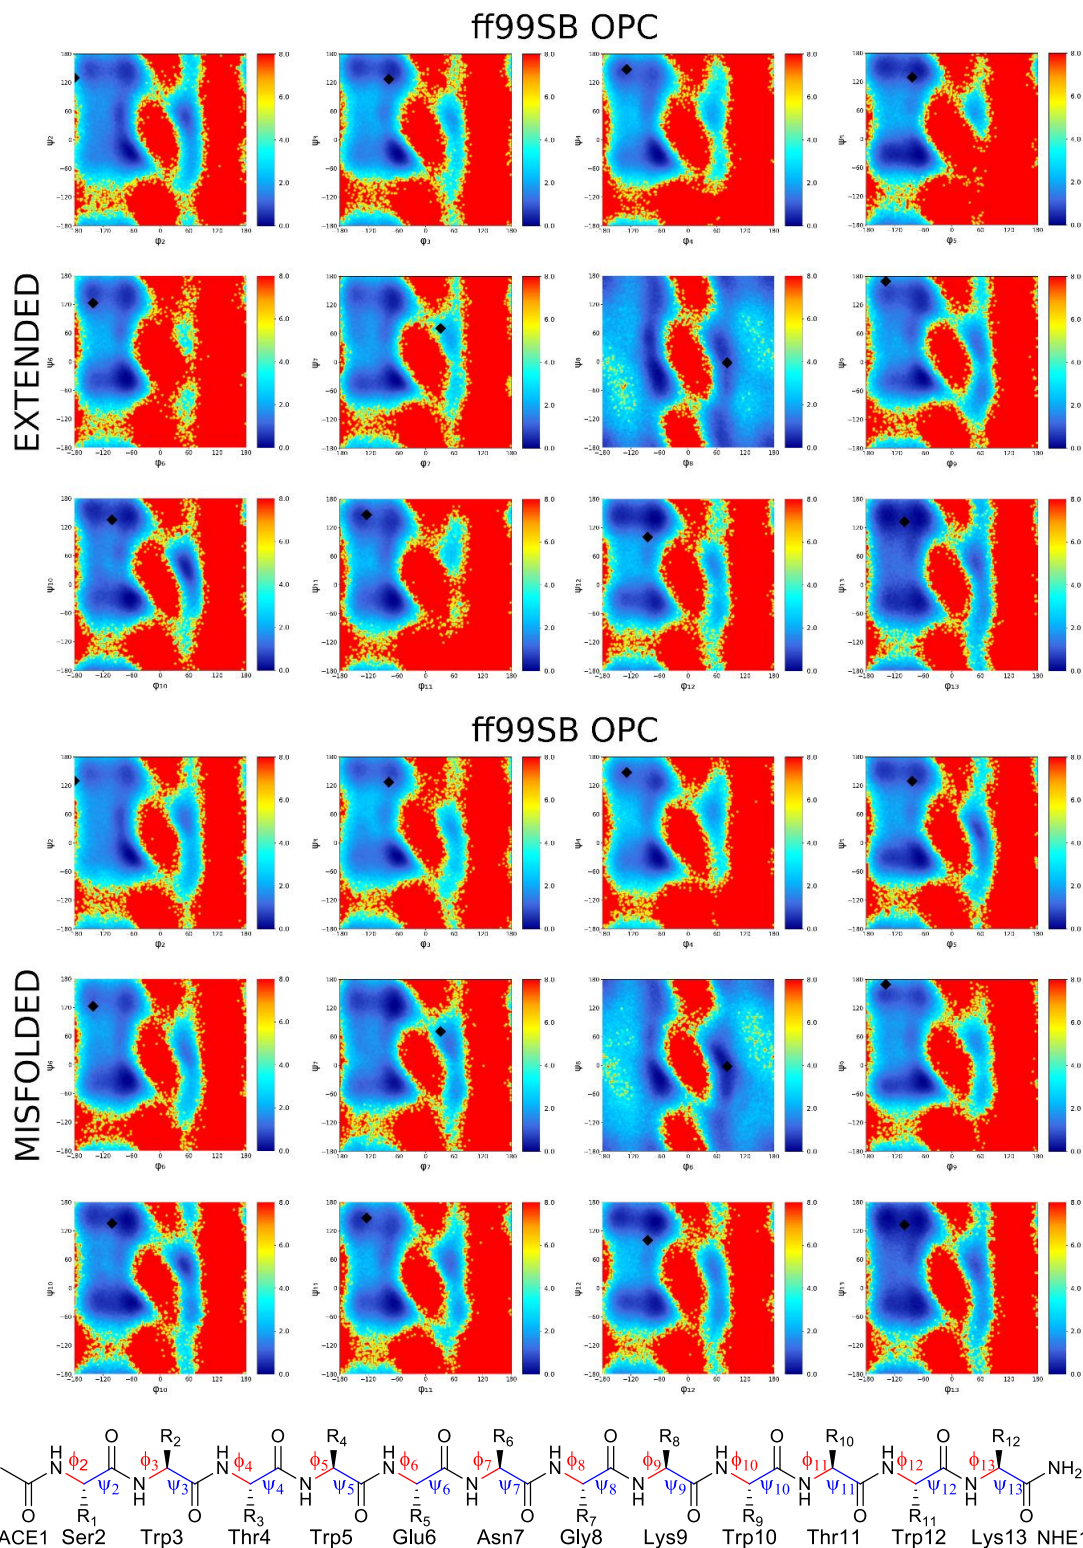

**Figure S62.** PMFs obtained from  $\phi$  and  $\psi$  dihedral distributions of B2 residues for the ff99SB/OPC combination from extended (top panel) and misfolded (bottom panels) conformations. PMFs are shown as heat maps (0.0 – 8.0 kcal/mol range) from dark blue to red. The native conformation's  $\phi$  and  $\psi$  angles are reported as black diamonds. B2 sequence and representation of  $\phi$  and  $\psi$  angles numbering are also shown.

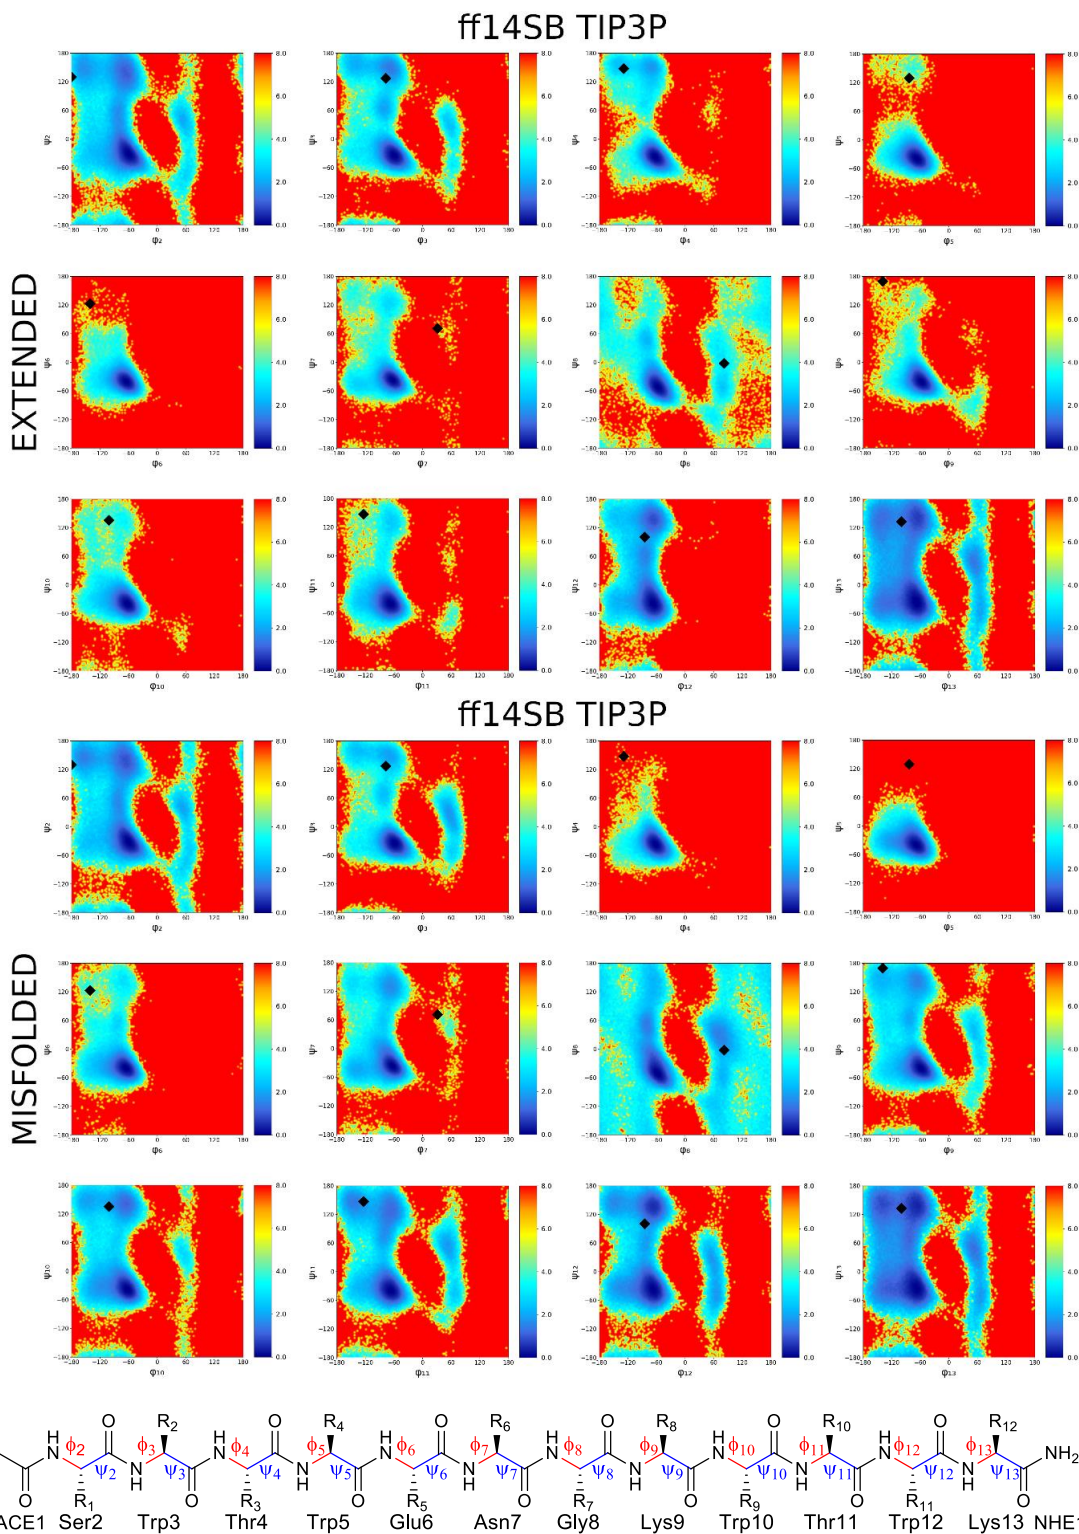

**Figure S63.** PMFs obtained from  $\varphi$  and  $\psi$  dihedral distributions of B2 residues for the ff14SB/TIP3P combination from extended (top panel) and misfolded (bottom panels) conformations. PMFs are shown as heat maps (0.0 – 8.0 kcal/mol range) from dark blue to red. The native conformation's  $\varphi$  and  $\psi$  angles are reported as black diamonds. B2 sequence and representation of  $\varphi$  and  $\psi$  angles numbering are also shown.



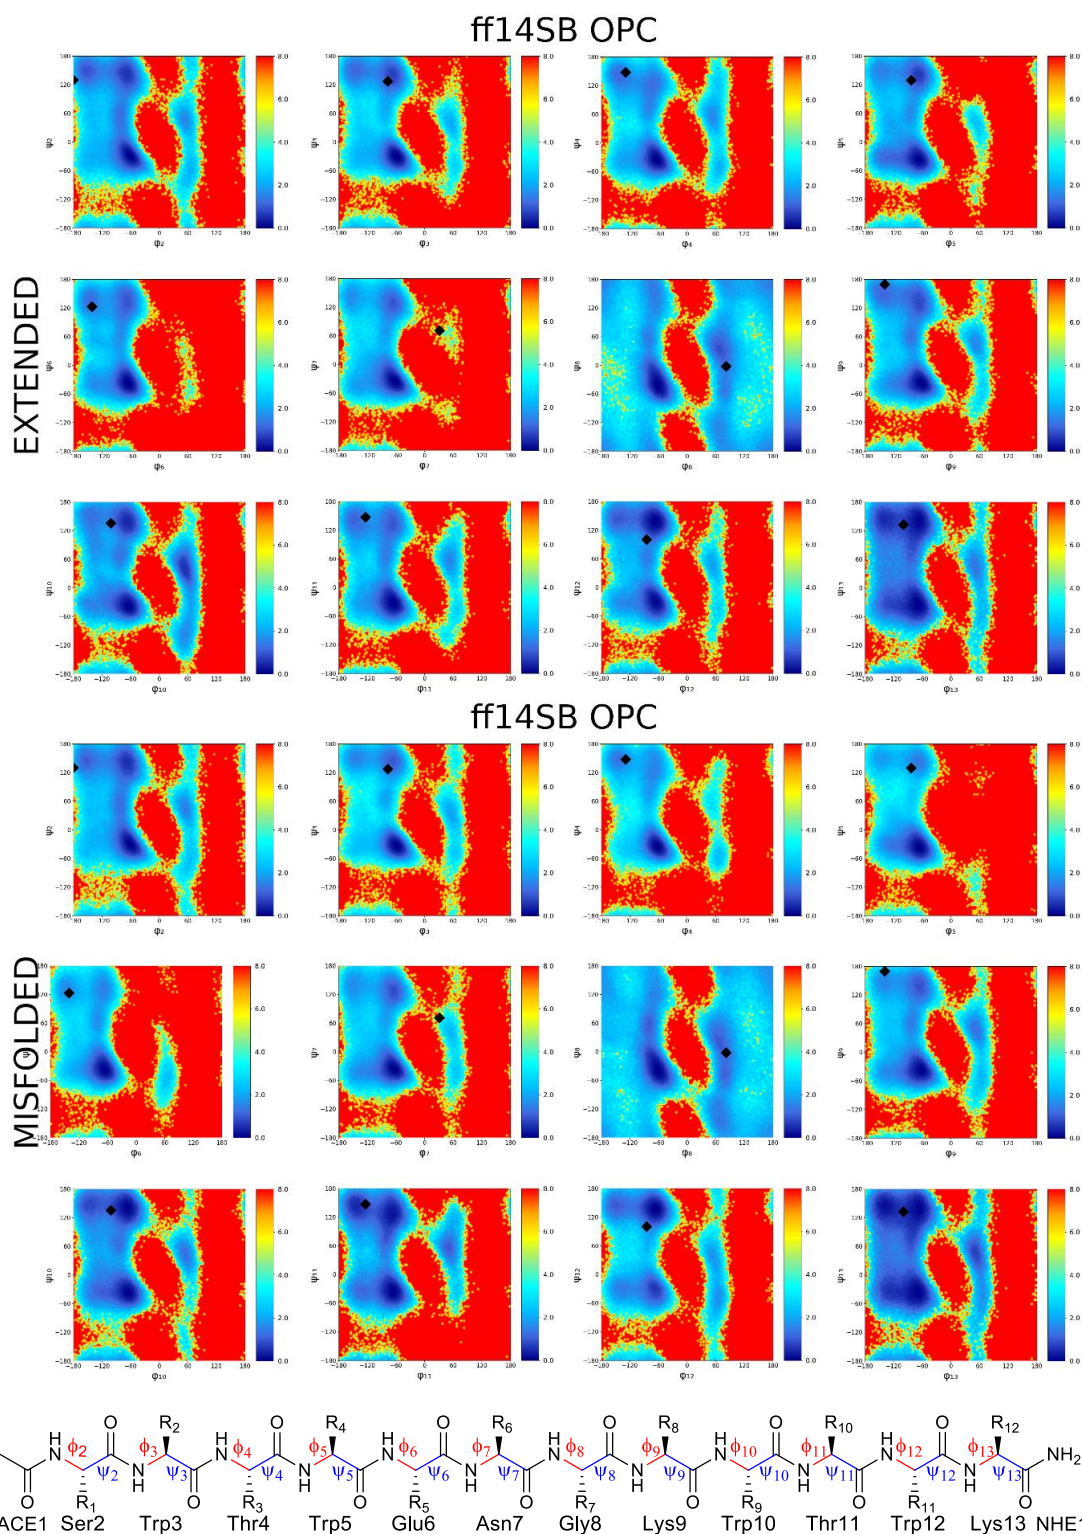

**Figure S64.** PMFs obtained from  $\phi$  and  $\psi$  dihedral distributions of B2 residues for the ff14SB/OPC combination from extended (top panel) and misfolded (bottom panels) conformations. PMFs are shown as heat maps (0.0 – 8.0 kcal/mol range) from dark blue to red. The native conformation's  $\phi$  and  $\psi$  angles are reported as black diamonds. B2 sequence and representation of  $\phi$  and  $\psi$  angles numbering are also shown.

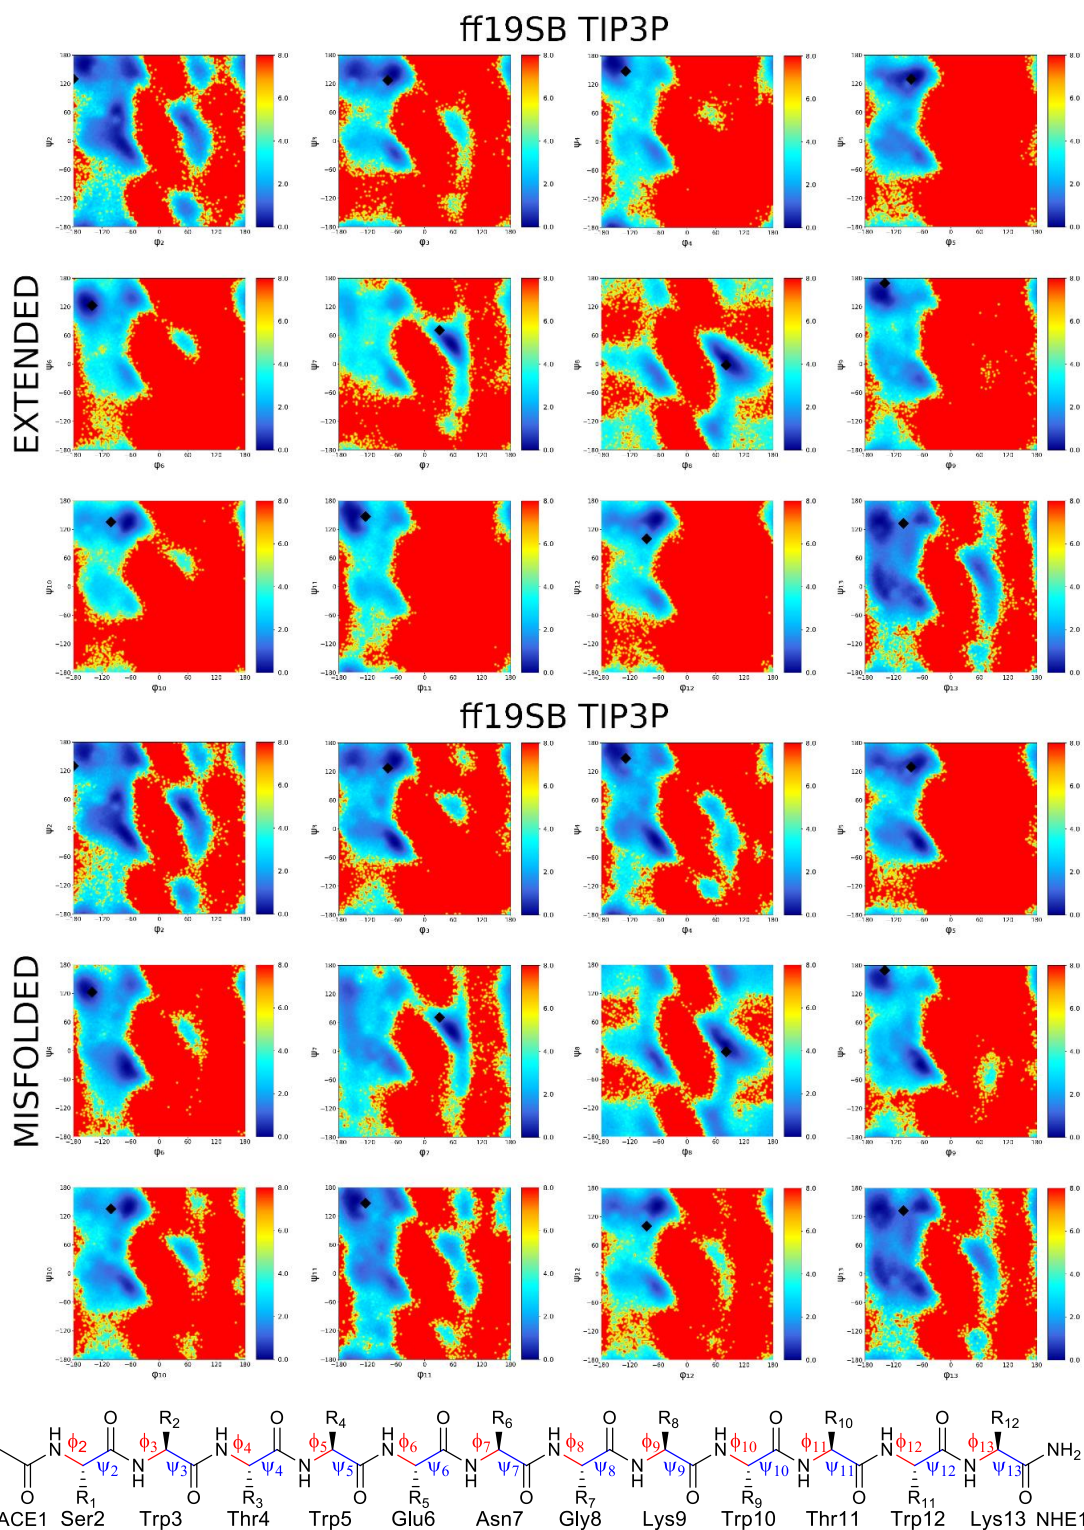

**Figure S65.** PMFs obtained from  $\phi$  and  $\psi$  dihedral distributions of B2 residues for the ff19SB/TIP3P combination from extended (top panel) and misfolded (bottom panels) conformations. PMFs are shown as heat maps (0.0 – 8.0 kcal/mol range) from dark blue to red. The native conformation's  $\phi$  and  $\psi$  angles are reported as black diamonds.

### ff19SB OPC

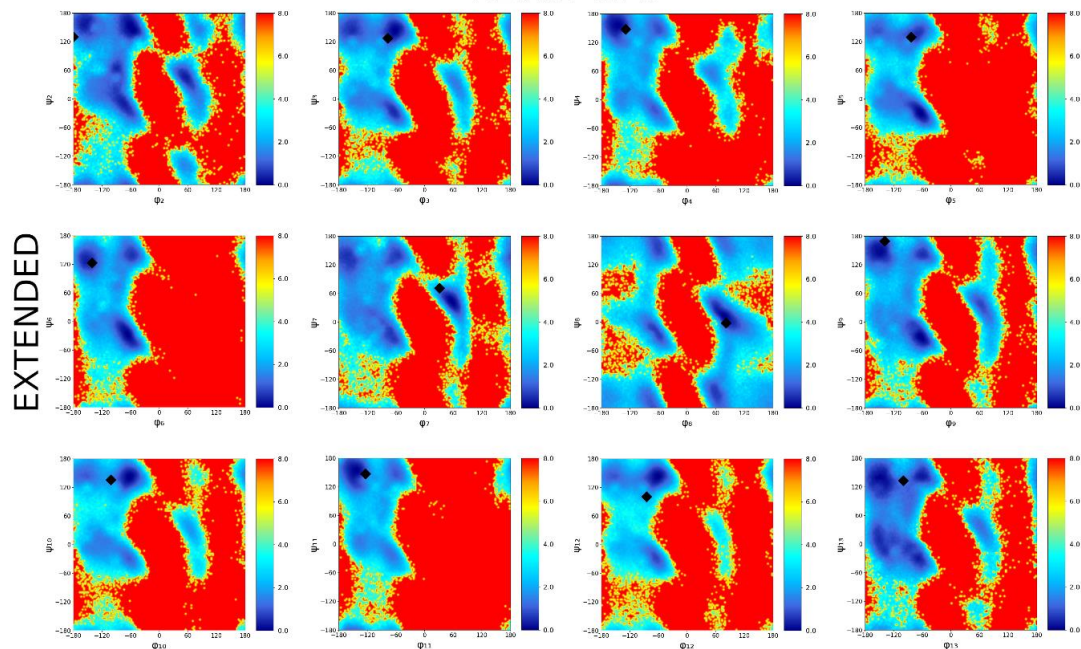

### ff19SB OPC

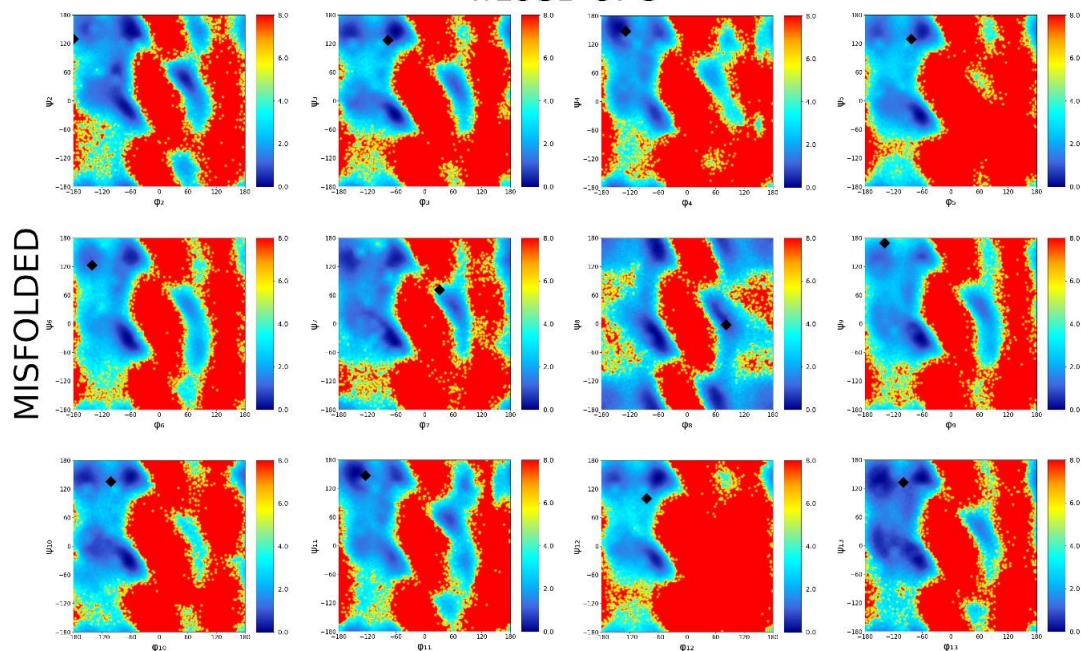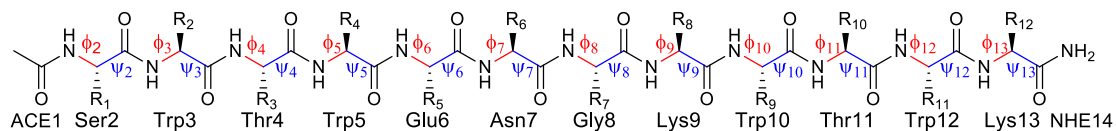

**Figure S66.** PMFs obtained from  $\phi$  and  $\psi$  dihedral distributions of B2 residues for the ff19SB/OPC combination from extended (top panel) and misfolded (bottom panels) conformations. PMFs are shown as heat maps (0.0 – 8.0 kcal/mol range) from dark blue to red. The native conformation's  $\phi$  and  $\psi$  angles are reported as black diamonds. B2 sequence and representation of  $\phi$  and  $\psi$  angles numbering are also shown.

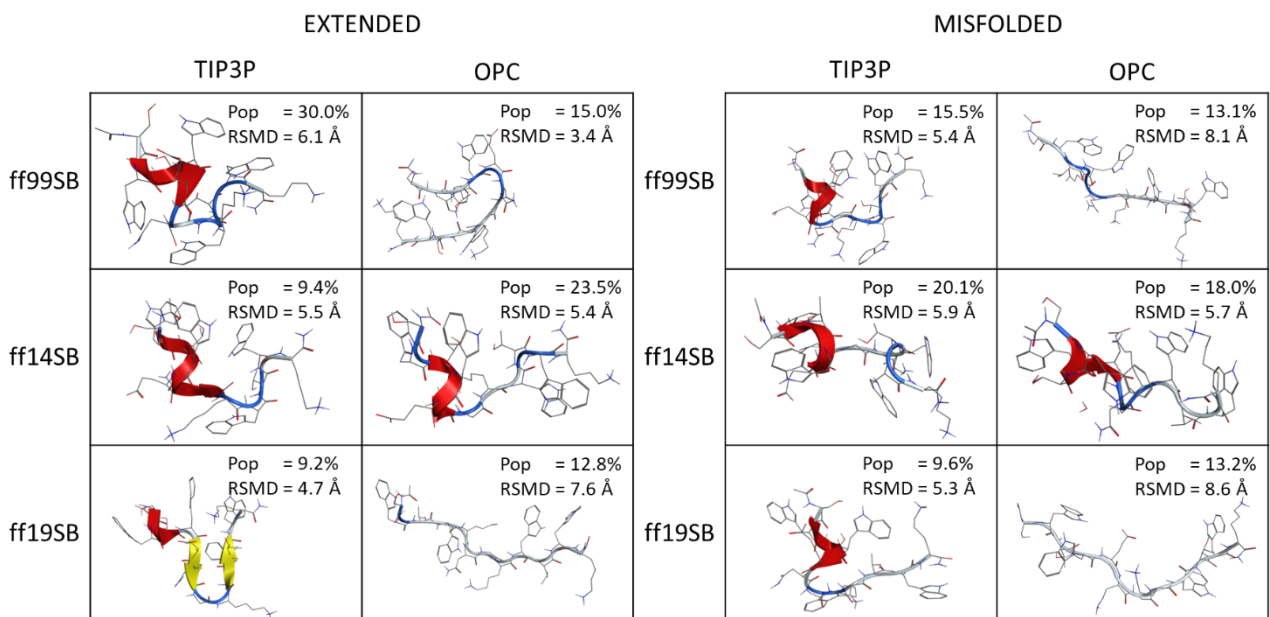

**Figure S67.** Representative conformation of the second cluster from B2 trajectories. Population (pop%) and RMSD vs native structure are also shown in the figure.

**Table S7.** H-bond analyses from B2 trajectories. Only H-bonds involving the backbone are included in the table (donor N-H, acceptor C=O). Native H-bonds are highlighted in bold.

|              |          |       | NATIVE       |          |      |              |          |       |           |          |       |
|--------------|----------|-------|--------------|----------|------|--------------|----------|-------|-----------|----------|-------|
| donor        |          |       | acceptor     |          |      | Distance     |          |       |           |          |       |
| <b>SER2</b>  |          |       | <b>LYS13</b> |          |      | <b>2.74</b>  |          |       |           |          |       |
| <b>LYS9</b>  |          |       | <b>GLU6</b>  |          |      | <b>2.84</b>  |          |       |           |          |       |
| <b>THR4</b>  |          |       | <b>THR11</b> |          |      | <b>2.9</b>   |          |       |           |          |       |
| <b>GLU6</b>  |          |       | <b>LYS9</b>  |          |      | <b>2.92</b>  |          |       |           |          |       |
| <b>LYS13</b> |          |       | <b>SER2</b>  |          |      | <b>2.96</b>  |          |       |           |          |       |
| <b>THR11</b> |          |       | <b>THR4</b>  |          |      | <b>2.99</b>  |          |       |           |          |       |
| <b>GLU6</b>  |          |       | <b>GLY8</b>  |          |      | <b>3.31</b>  |          |       |           |          |       |
| <b>THR11</b> |          |       | <b>LYS13</b> |          |      | <b>3.37</b>  |          |       |           |          |       |
| <b>ASN7</b>  |          |       | <b>LYS9</b>  |          |      | <b>3.47</b>  |          |       |           |          |       |
| <b>SER2</b>  |          |       | <b>THR4</b>  |          |      | <b>3.62</b>  |          |       |           |          |       |
| <b>THR4</b>  |          |       | <b>GLU6</b>  |          |      | <b>3.78</b>  |          |       |           |          |       |
| <b>TRP12</b> |          |       | <b>NME</b>   |          |      | <b>4.15</b>  |          |       |           |          |       |
| <b>LYS9</b>  |          |       | <b>THR11</b> |          |      | <b>4.21</b>  |          |       |           |          |       |
| <b>THR11</b> |          |       | <b>TRP3</b>  |          |      | <b>4.47</b>  |          |       |           |          |       |
| <b>SER2</b>  |          |       | <b>TRP12</b> |          |      | <b>4.47</b>  |          |       |           |          |       |
| <b>LYS9</b>  |          |       | <b>TRP5</b>  |          |      | <b>4.49</b>  |          |       |           |          |       |
| ff99SB OPC   |          |       |              |          |      | ff99SB TIP3P |          |       |           |          |       |
| EXTENDED     |          |       | MISFOLDED    |          |      | EXTENDED     |          |       | MISFOLDED |          |       |
| donor        | acceptor | occ%  | donor        | acceptor | occ% | donor        | acceptor | occ%  | donor     | acceptor | occ%  |
| SER2         | GLU6     | 10.61 | TRP3         | ASN7     | 9.59 | TRP3         | ASN7     | 28.69 | TRP3      | ASN7     | 30.04 |

|      |       |      |
|------|-------|------|
| TRP3 | ASN7  | 8.46 |
| SER2 | TRP5  | 6.53 |
| LYS9 | LYS13 | 5.14 |

|             |             |      |
|-------------|-------------|------|
| SER2        | GLU6        | 9.54 |
| GLU6        | TRP10       | 6.92 |
| ACE1        | THR4        | 6.15 |
| SER2        | TRP5        | 5.83 |
| <b>GLU6</b> | <b>LYS9</b> | 5.25 |
| ACE1        | TRP3        | 5.04 |
| <b>ASN7</b> | <b>LYS9</b> | 5.02 |

|             |             |       |
|-------------|-------------|-------|
| SER2        | GLU6        | 19.53 |
| THR4        | GLY8        | 11.81 |
| TRP5        | LYS9        | 10.37 |
| GLU6        | TRP10       | 10.22 |
| SER2        | TRP5        | 10.03 |
| TRP3        | GLY8        | 9.55  |
| <b>ASN7</b> | <b>LYS9</b> | 9.43  |
| LYS9        | LYS13       | 7.70  |
| ACE1        | THR4        | 7.06  |
| ASN7        | THR11       | 5.76  |
| TRP3        | GLU6        | 5.65  |

|             |             |       |
|-------------|-------------|-------|
| SER2        | GLU6        | 24.18 |
| GLU6        | TRP10       | 15.15 |
| GLY8        | TRP12       | 14.70 |
| LYS9        | LYS13       | 13.42 |
| ASN7        | THR11       | 12.85 |
| THR4        | GLY8        | 12.51 |
| SER2        | TRP5        | 12.14 |
| TRP3        | GLY8        | 10.66 |
| TRP5        | LYS9        | 10.02 |
| ACE1        | THR4        | 9.21  |
| <b>ASN7</b> | <b>LYS9</b> | 8.61  |
| GLY8        | THR11       | 6.92  |
| <b>GLU6</b> | <b>LYS9</b> | 6.57  |
| ACE1        | TRP5        | 6.26  |
| GLY8        | LYS13       | 5.13  |

| ff14SB OPC  |             |       |             |             |       |
|-------------|-------------|-------|-------------|-------------|-------|
| EXTENDED    |             |       | MISFOLDED   |             |       |
| donor       | acceptor    | occ%  | donor       | acceptor    | occ%  |
| GLU6        | TRP10       | 12.89 | TRP3        | ASN7        | 18.92 |
| SER2        | GLU6        | 12.83 | SER2        | GLU6        | 15.66 |
| TRP3        | ASN7        | 10.45 | THR4        | GLY8        | 10.85 |
| ASN7        | THR11       | 10.33 | GLU6        | TRP10       | 9.50  |
| THR4        | GLY8        | 7.23  | SER2        | TRP5        | 8.25  |
| GLY8        | TRP12       | 7.20  | ASN7        | THR11       | 7.26  |
| SER2        | TRP5        | 6.86  | ACE1        | THR4        | 6.42  |
| ACE1        | THR4        | 6.65  | TRP5        | LYS9        | 5.89  |
| <b>GLU6</b> | <b>LYS9</b> | 5.15  | <b>ASN7</b> | <b>LYS9</b> | 5.33  |

| ff14SB TIP3P |          |       |           |          |       |
|--------------|----------|-------|-----------|----------|-------|
| EXTENDED     |          |       | MISFOLDED |          |       |
| donor        | acceptor | occ%  | donor     | acceptor | occ%  |
| TRP3         | ASN7     | 44.90 | TRP3      | ASN7     | 46.71 |
| GLY8         | TRP12    | 42.56 | SER2      | GLU6     | 25.95 |
| TRP5         | LYS9     | 39.18 | THR4      | GLY8     | 22.48 |
| ASN7         | THR11    | 36.49 | TRP5      | LYS9     | 22.47 |
| THR4         | GLY8     | 33.59 | GLY8      | TRP12    | 22.33 |
| GLU6         | TRP10    | 32.53 | ASN7      | THR11    | 21.49 |
| LYS9         | LYS13    | 23.56 | GLU6      | TRP10    | 18.96 |
| SER2         | GLU6     | 20.88 | LYS9      | LYS13    | 15.37 |
| ACE1         | THR4     | 10.49 | SER2      | TRP5     | 9.74  |
| GLY8         | THR11    | 8.97  | ACE1      | THR4     | 9.21  |
| ACE1         | TRP5     | 6.69  | ACE1      | TRP5     | 7.78  |
| SER2         | TRP5     | 6.29  | TRP3      | GLU6     | 6.71  |
|              |          |       | GLY8      | THR11    | 5.46  |

| ff19SB OPC   |              |       |           |          |       |
|--------------|--------------|-------|-----------|----------|-------|
| EXTENDED     |              |       | MISFOLDED |          |       |
| donor        | acceptor     | occ%  | donor     | acceptor | occ%  |
| <b>THR4</b>  | <b>THR11</b> | 16.90 | TRP3      | ASN7     | 22.38 |
| <b>THR11</b> | <b>THR4</b>  | 15.63 | SER2      | GLU6     | 21.11 |
| <b>SER2</b>  | <b>LYS13</b> | 12.73 | GLU6      | TRP10    | 17.28 |
| <b>LYS9</b>  | <b>GLU6</b>  | 12.19 | GLY8      | TRP12    | 15.13 |
|              |              |       | ASN7      | THR11    | 13.77 |
|              |              |       | TRP5      | LYS9     | 12.00 |
|              |              |       | THR4      | GLY8     | 11.87 |
|              |              |       | LYS9      | LYS13    | 8.02  |
|              |              |       | ACE1      | TRP5     | 7.77  |
|              |              |       | TRP3      | GLY8     | 6.10  |
|              |              |       | ACE1      | THR4     | 5.97  |
|              |              |       | SER2      | TRP5     | 5.96  |

| ff19SB TIP3P |              |       |              |              |       |
|--------------|--------------|-------|--------------|--------------|-------|
| EXTENDED     |              |       | MISFOLDED    |              |       |
| donor        | acceptor     | occ%  | donor        | acceptor     | occ%  |
| <b>THR4</b>  | <b>THR11</b> | 53.39 | <b>THR4</b>  | <b>THR11</b> | 24.54 |
| <b>THR11</b> | <b>THR4</b>  | 45.56 | <b>LYS9</b>  | <b>GLU6</b>  | 20.21 |
| <b>SER2</b>  | <b>LYS13</b> | 45.01 | <b>THR11</b> | <b>THR4</b>  | 17.66 |
| <b>LYS9</b>  | <b>GLU6</b>  | 40.83 | <b>SER2</b>  | <b>LYS13</b> | 16.02 |
| <b>GLU6</b>  | <b>LYS9</b>  | 17.20 | GLY8         | THR11        | 8.47  |
| <b>LYS13</b> | <b>SER2</b>  | 7.96  | <b>GLU6</b>  | <b>LYS9</b>  | 6.31  |
| ACE1         | TRP3         | 5.30  | TRP3         | GLU6         | 5.88  |
|              |              |       | TRP3         | ASN7         | 5.41  |
|              |              |       | THR4         | LYS13        | 5.03  |

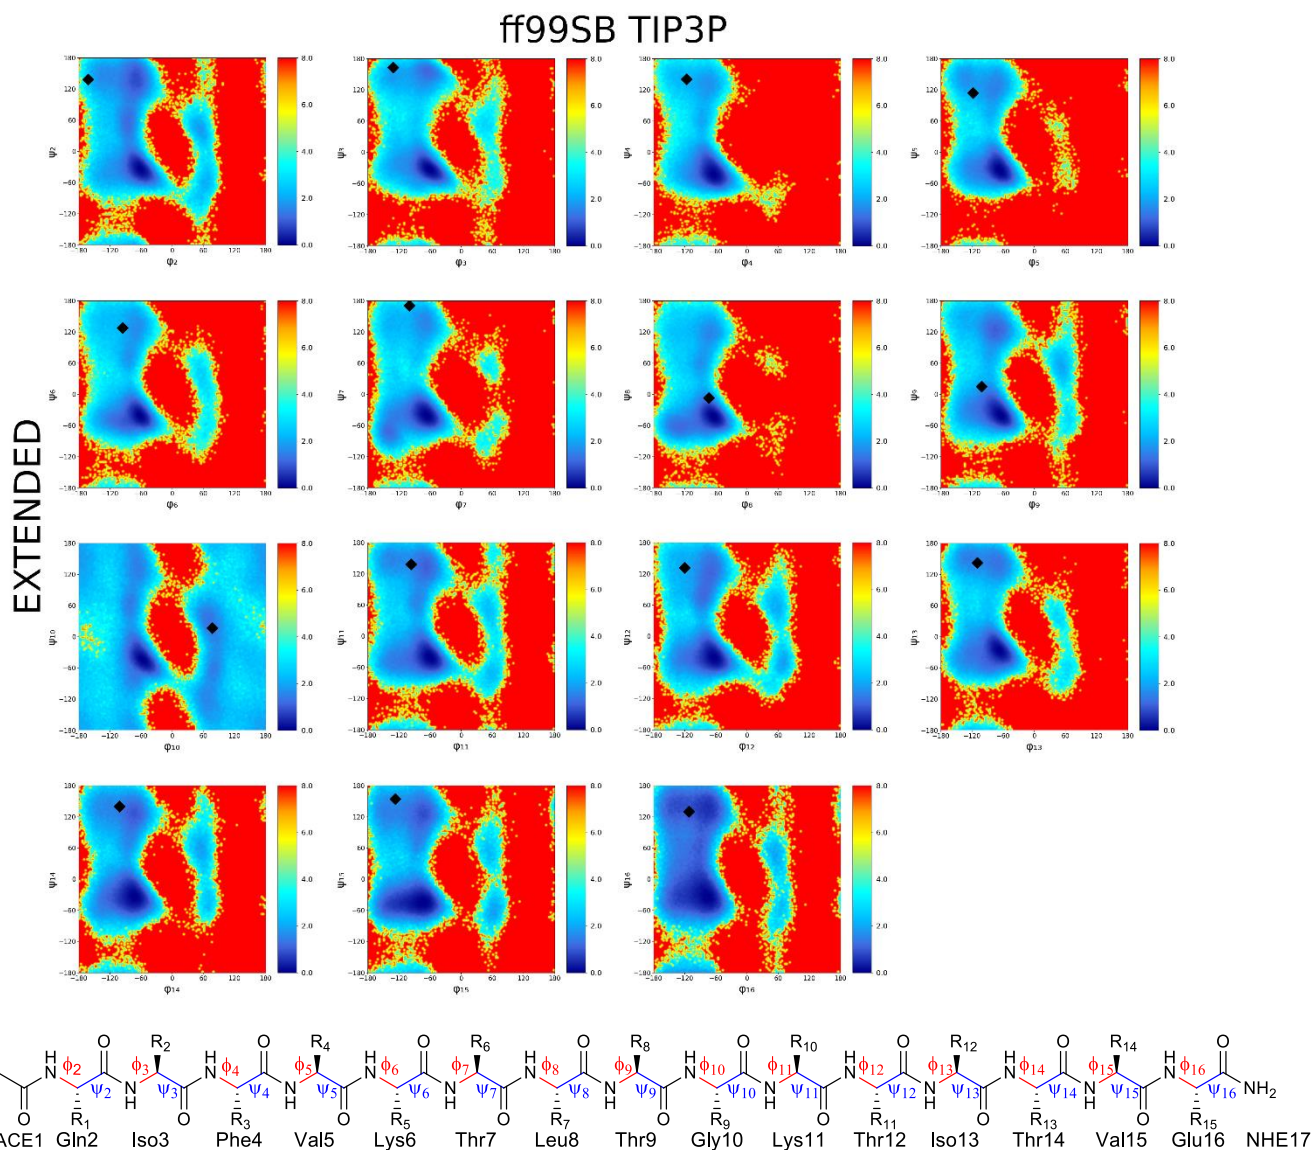

**Figure S68.** PMFs obtained from  $\phi$  and  $\psi$  dihedral distributions of B3 residues for the ff99SB/TIP3P combination from an extended conformation. PMFs are shown as heat maps (0.0 – 8.0 kcal/mol range) from dark blue to red. The native conformation's  $\phi$  and  $\psi$  angles are reported as black diamonds. B3 sequence and representation of  $\phi$  and  $\psi$  angles numbering are also shown.

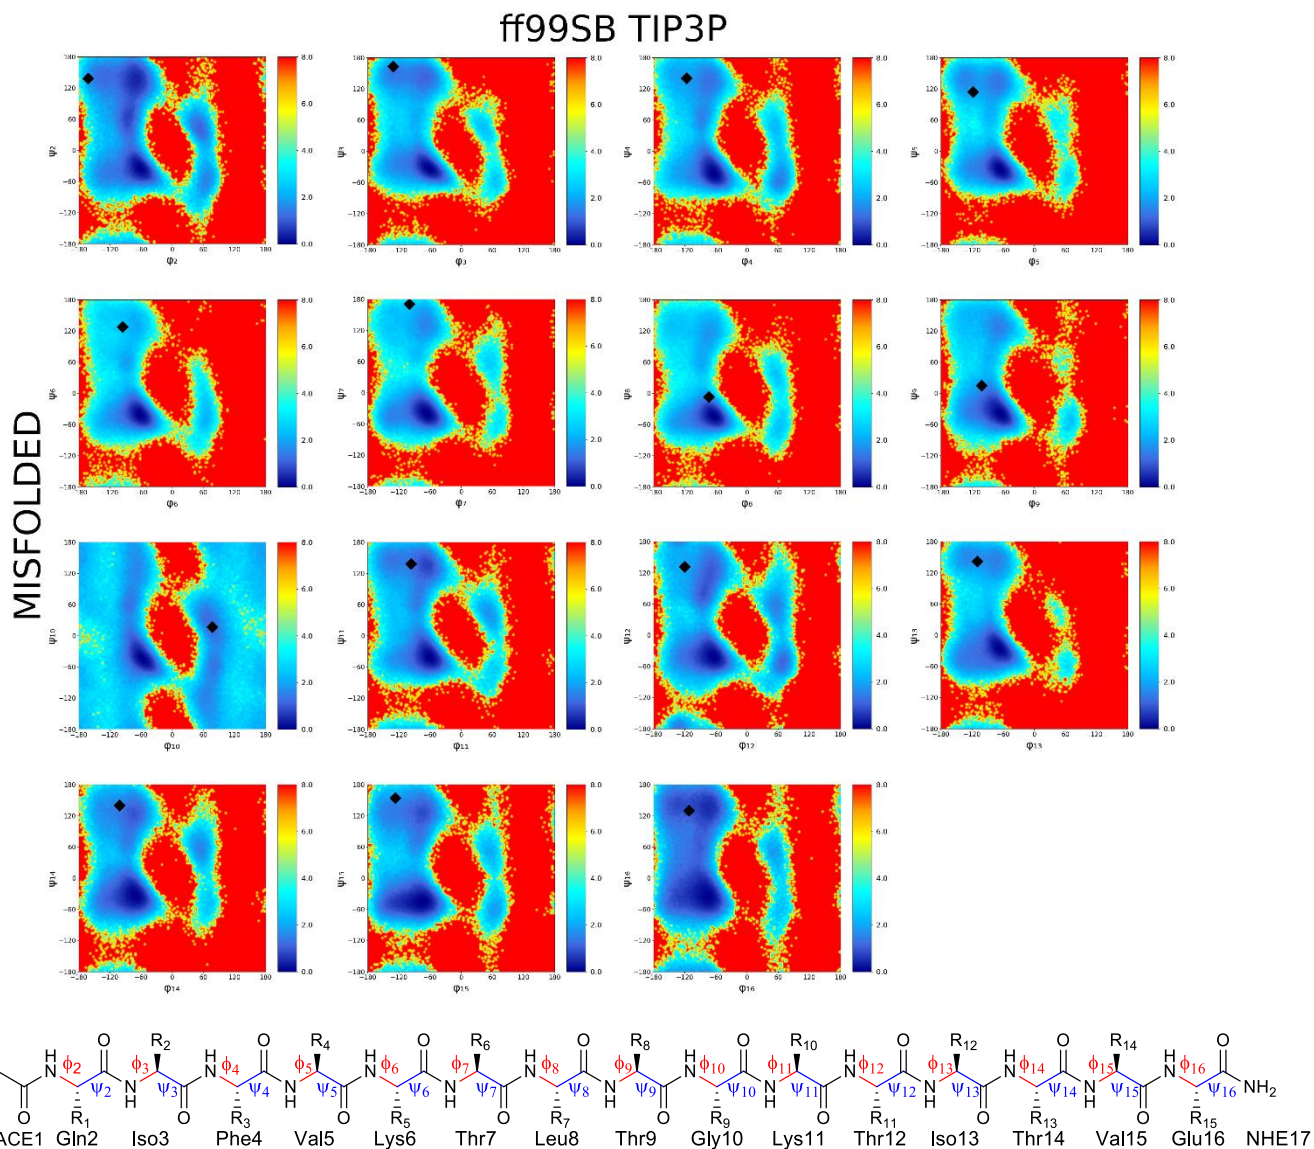

**Figure S69.** PMFs obtained from  $\phi$  and  $\psi$  dihedral distributions of B3 residues for the ff99SB/TIP3P combination from a misfolded conformation. PMFs are shown as heat maps (0.0 – 8.0 kcal/mol range) from dark blue to red. The native conformation's  $\phi$  and  $\psi$  angles are reported as black diamonds. B3 sequence and representation of  $\phi$  and  $\psi$  angles numbering are also shown.

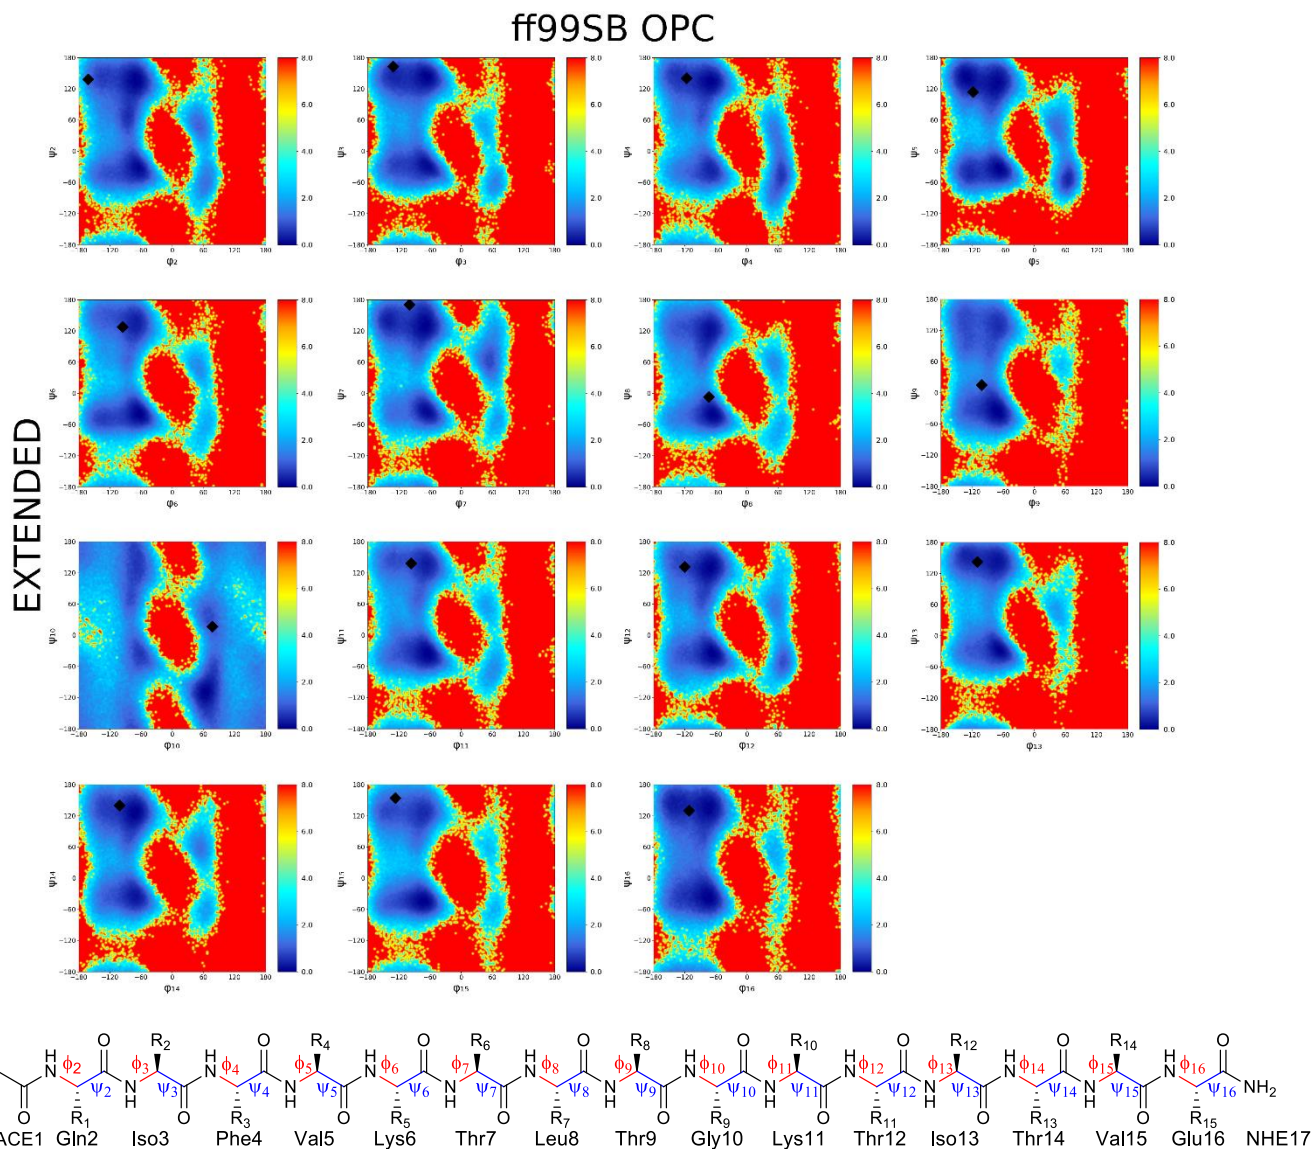

**Figure S70.** PMFs obtained from  $\phi$  and  $\psi$  dihedral distributions of B3 residues for the ff99SB/OPC combination from an extended conformation. PMFs are shown as heat maps (0.0 – 8.0 kcal/mol range) from dark blue to red. The native conformation's  $\phi$  and  $\psi$  angles are reported as black diamonds. B3 sequence and representation of  $\phi$  and  $\psi$  angles numbering are also shown.



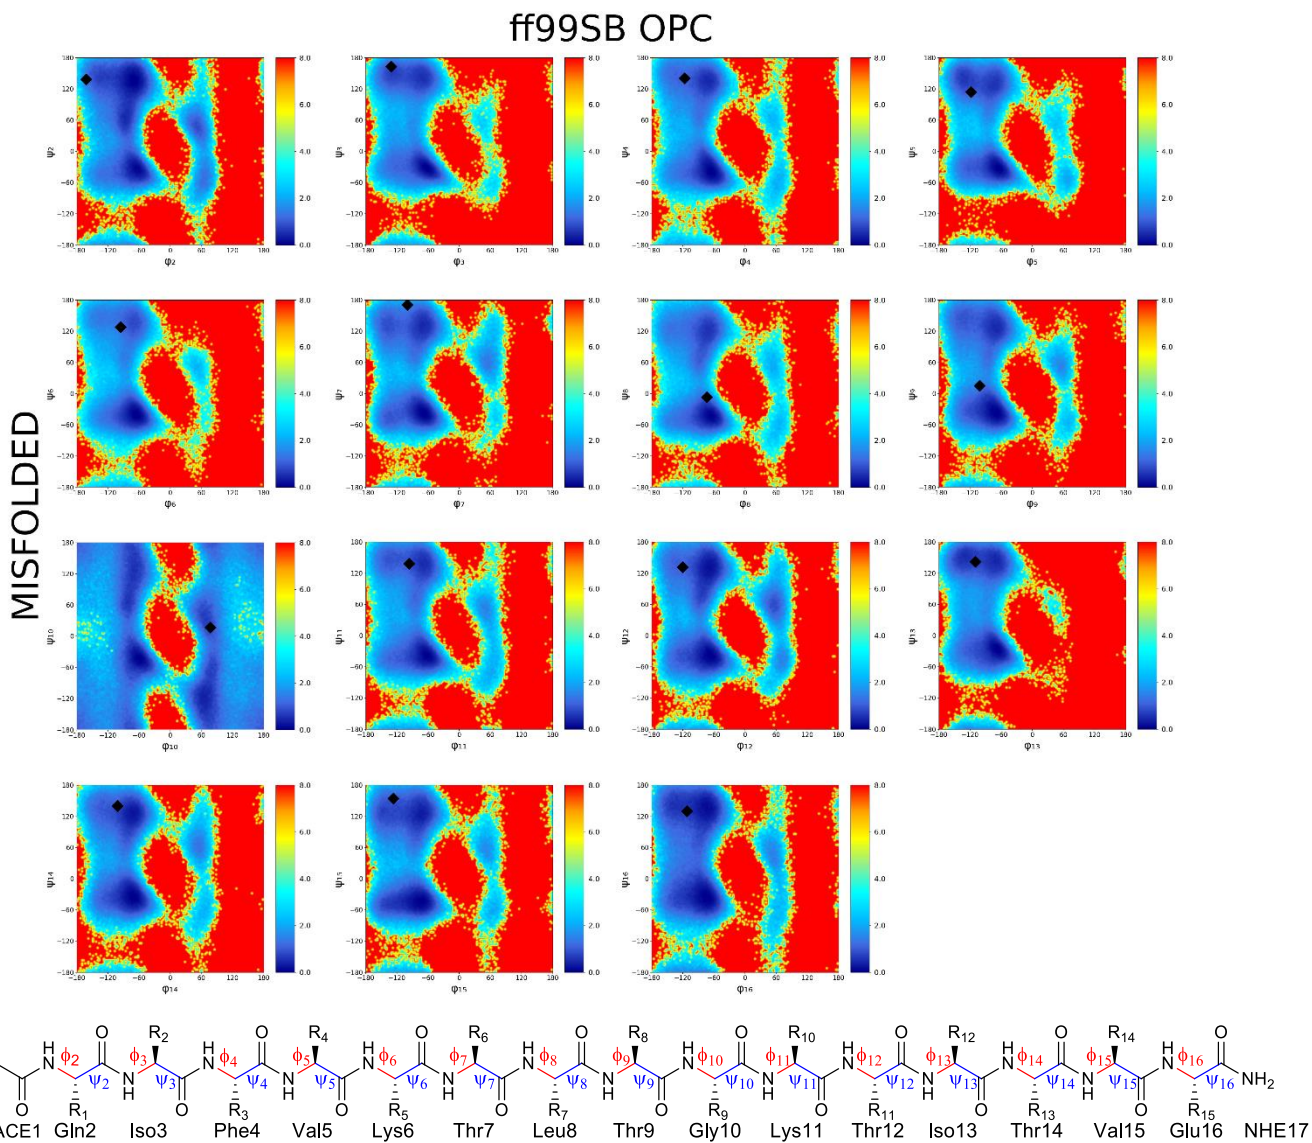

**Figure S71.** PMFs obtained from  $\phi$  and  $\psi$  dihedral distributions of B3 residues for the ff99SB/OPC combination from a misfolded conformation. PMFs are shown as heat maps (0.0 – 8.0 kcal/mol range) from dark blue to red. The native conformation's  $\phi$  and  $\psi$  angles are reported as black diamonds. B3 sequence and representation of  $\phi$  and  $\psi$  angles numbering are also shown.

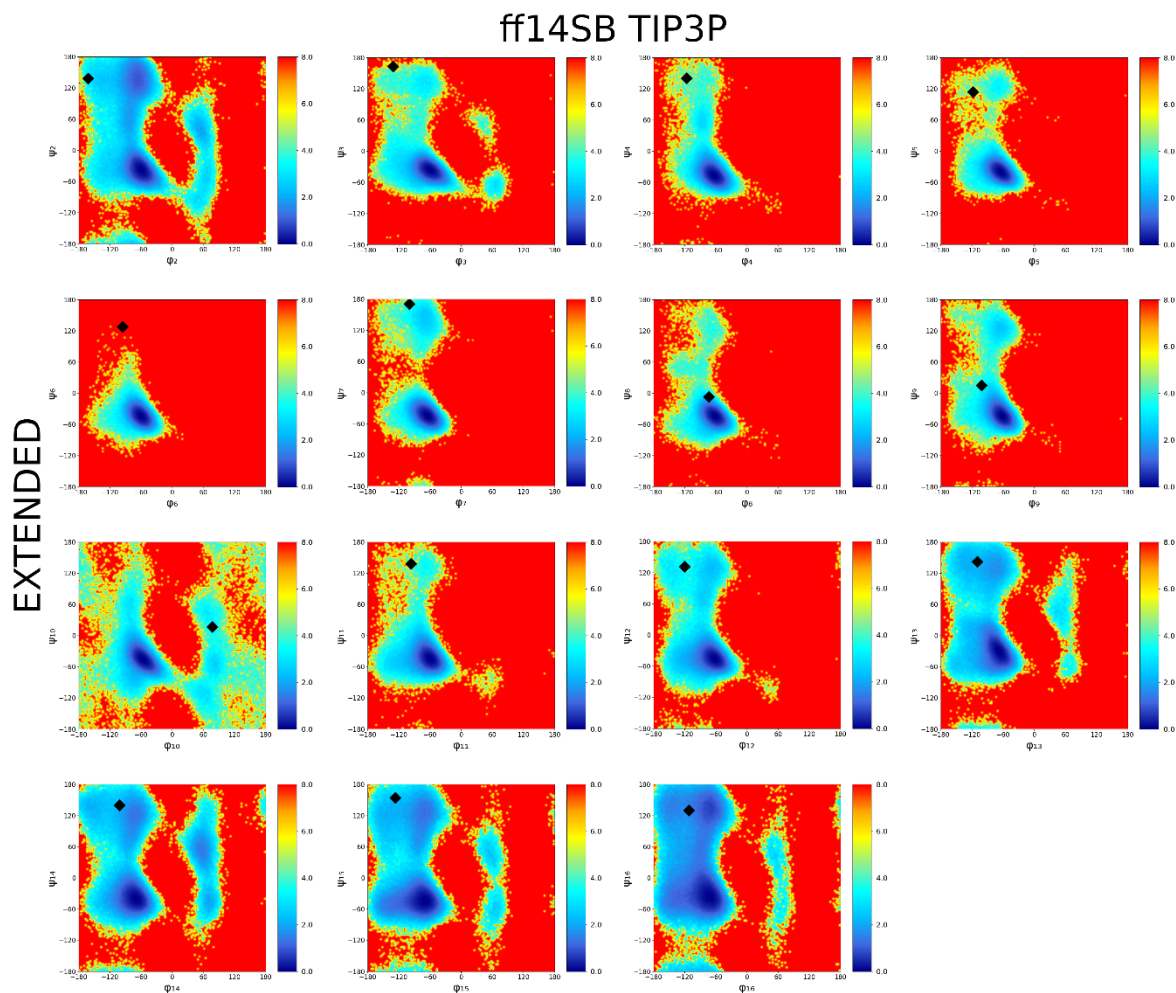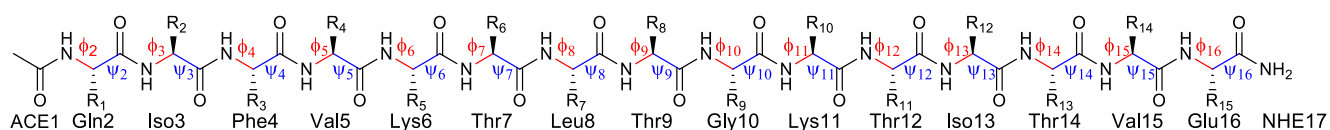

**Figure S72.** PMFs obtained from  $\phi$  and  $\psi$  dihedral distributions of B3 residues for the ff14SB/TIP3P combination from an extended conformation. PMFs are shown as heat maps (0.0 – 8.0 kcal/mol range) from dark blue to red. The native conformation's  $\phi$  and  $\psi$  angles are reported as black diamonds. B3 sequence and representation of  $\phi$  and  $\psi$  angles numbering are also shown.

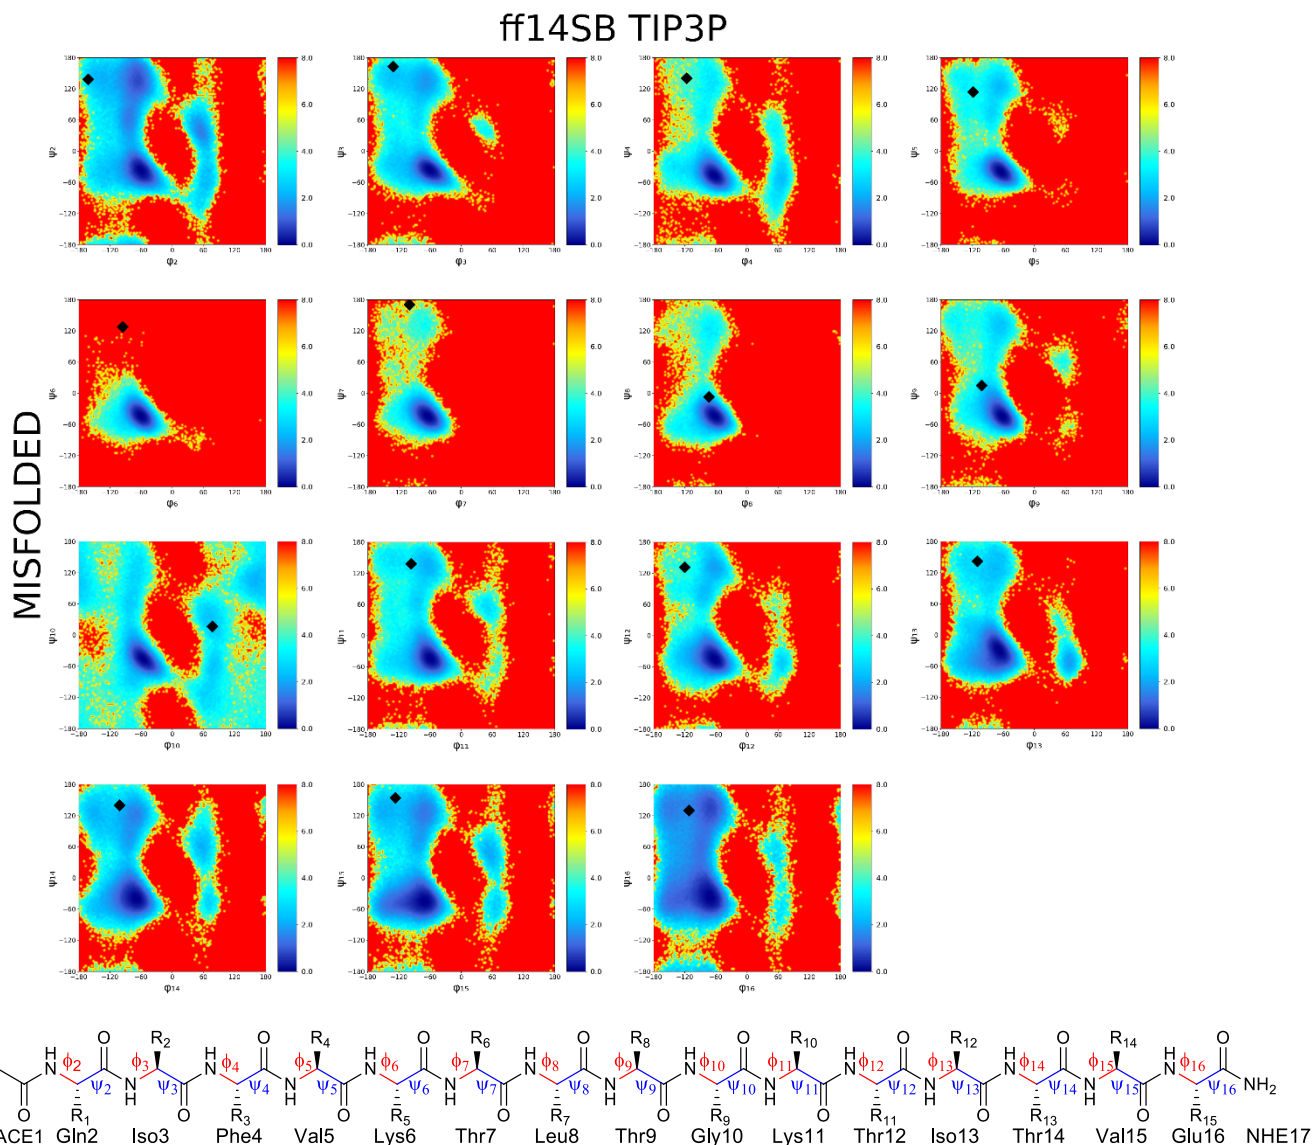

**Figure S73.** PMFs obtained from  $\phi$  and  $\psi$  dihedral distributions of B3 residues for the ff14SB/TIP3P combination from a misfolded conformation. PMFs are shown as heat maps (0.0 – 8.0 kcal/mol range) from dark blue to red. The native conformation's  $\phi$  and  $\psi$  angles are reported as black diamonds. B3 sequence and representation of  $\phi$  and  $\psi$  angles numbering are also shown.

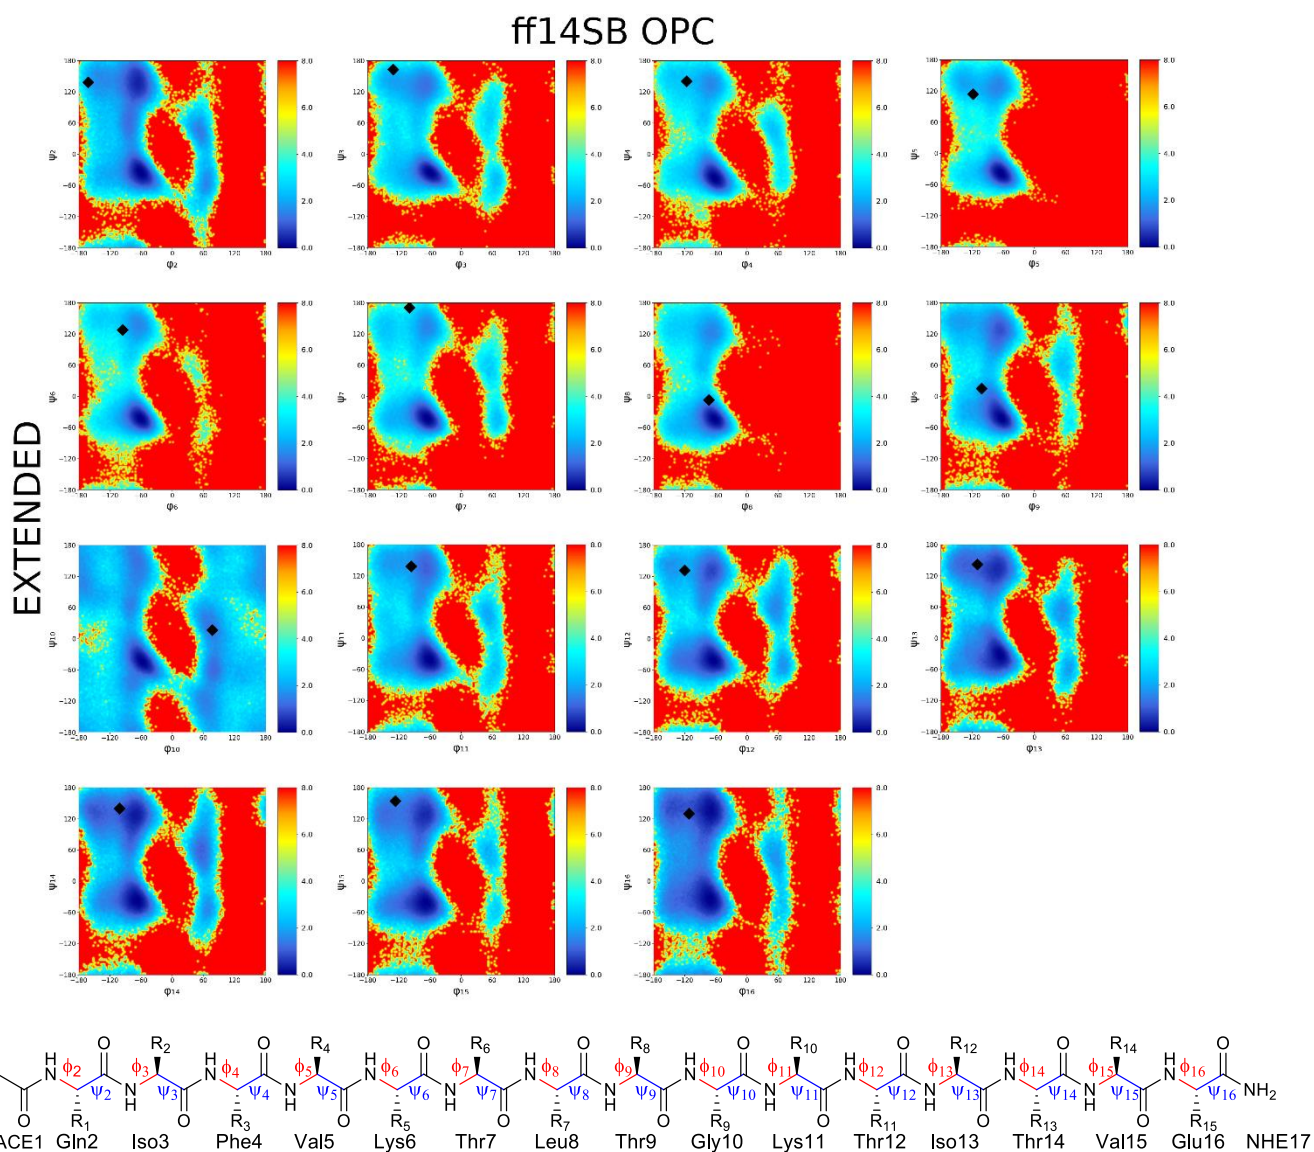

**Figure S74.** PMFs obtained from  $\phi$  and  $\psi$  dihedral distributions of B3 residues for the ff14SB/OPC combination from an extended conformation. PMFs are shown as heat maps (0.0 – 8.0 kcal/mol range) from dark blue to red. The native conformation's  $\phi$  and  $\psi$  angles are reported as black diamonds. B3 sequence and representation of  $\phi$  and  $\psi$  angles numbering are also shown.

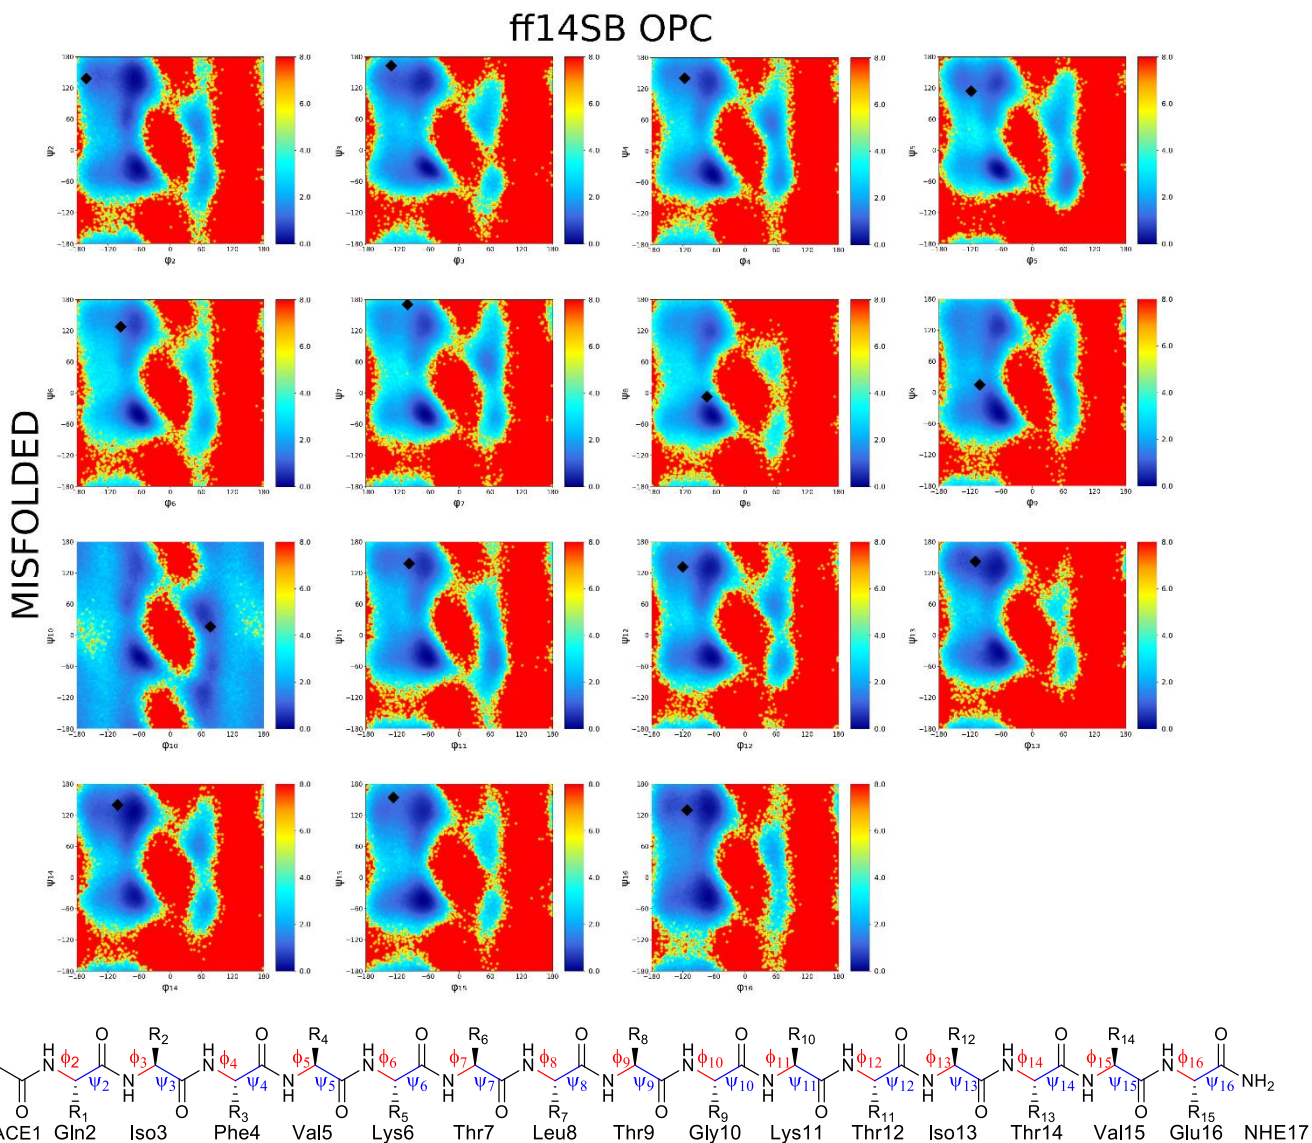

**Figure S75.** PMFs obtained from  $\phi$  and  $\psi$  dihedral distributions of B3 residues for the ff14SB/OPC combination from a misfolded conformation. PMFs are shown as heat maps (0.0 – 8.0 kcal/mol range) from dark blue to red. The native conformation's  $\phi$  and  $\psi$  angles are reported as black diamonds. B3 sequence and representation of  $\phi$  and  $\psi$  angles numbering are also shown.

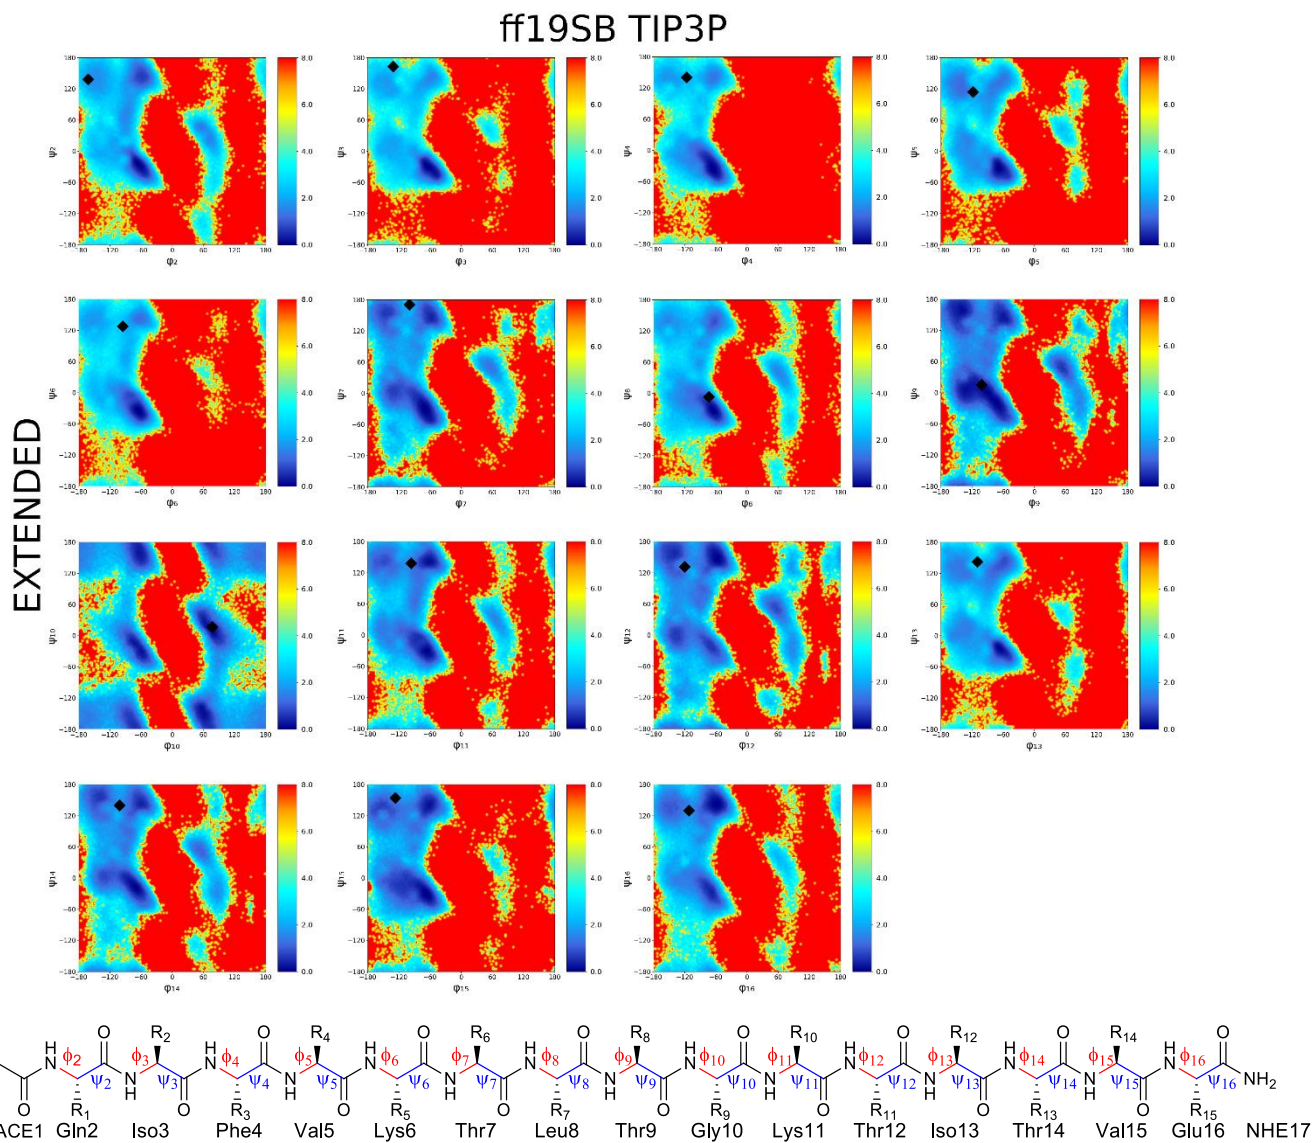

**Figure S76.** PMFs obtained from  $\phi$  and  $\psi$  dihedral distributions of B3 residues for the ff19SB/TIP3P combination from an extended conformation. PMFs are shown as heat maps (0.0 – 8.0 kcal/mol range) from dark blue to red. The native conformation's  $\phi$  and  $\psi$  angles are reported as black diamonds. B3 sequence and representation of  $\phi$  and  $\psi$  angles numbering are also shown.

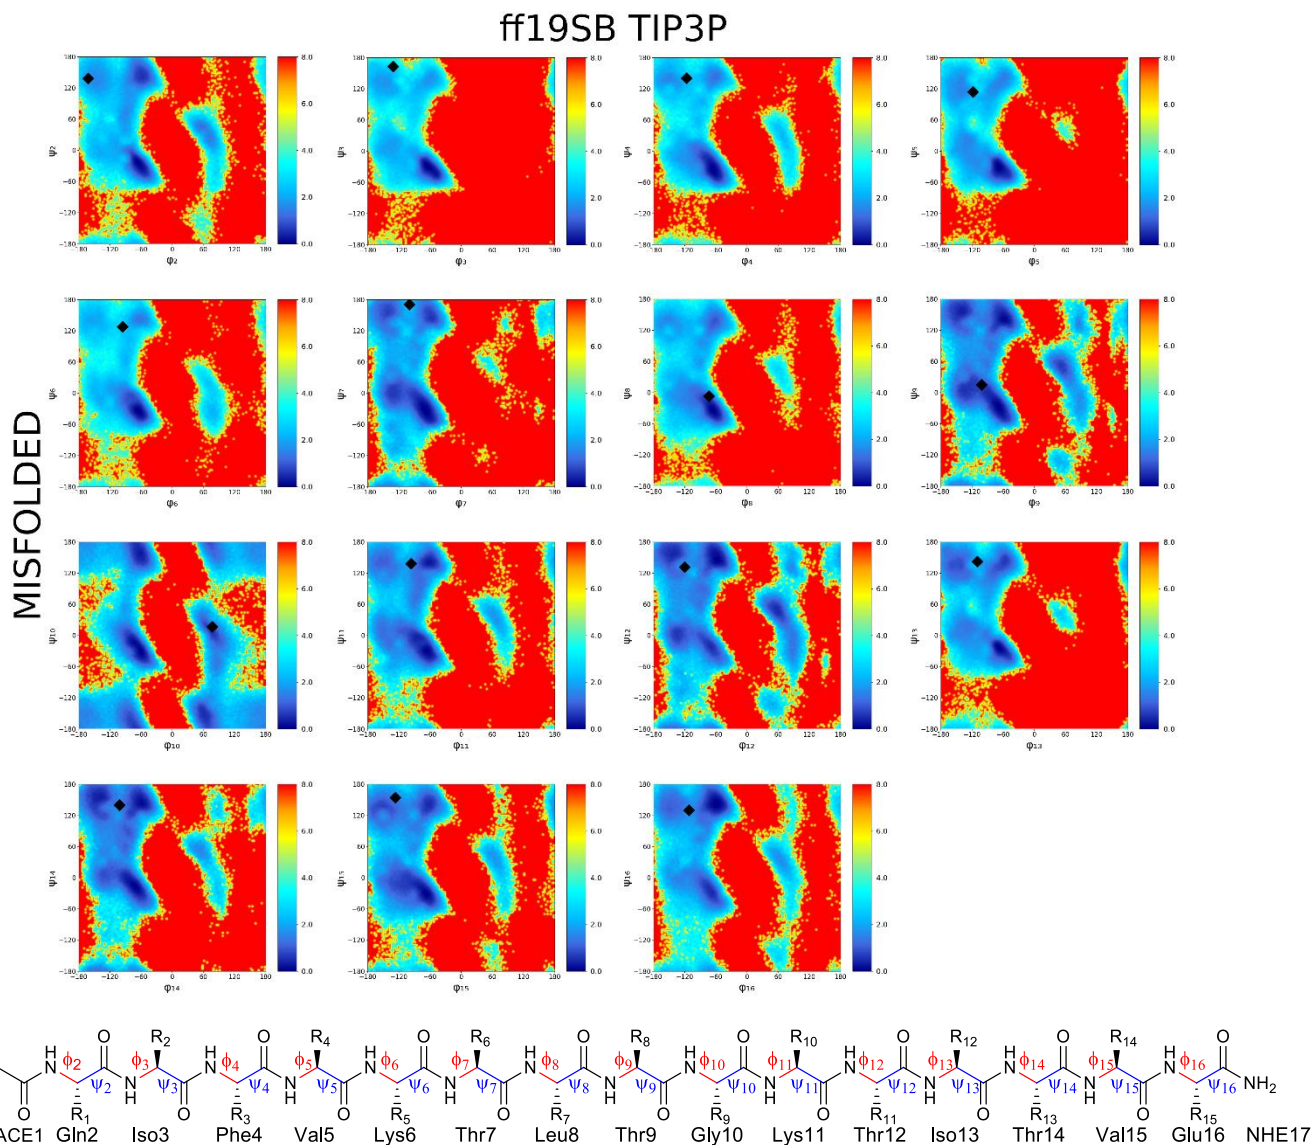

**Figure S77.** PMFs obtained from  $\phi$  and  $\psi$  dihedral distributions of B3 residues for the ff19SB/TIP3P combination from a misfolded conformation. PMFs are shown as heat maps (0.0 – 8.0 kcal/mol range) from dark blue to red. The native conformation's  $\phi$  and  $\psi$  angles are reported as black diamonds. B3 sequence and representation of  $\phi$  and  $\psi$  angles numbering are also shown.

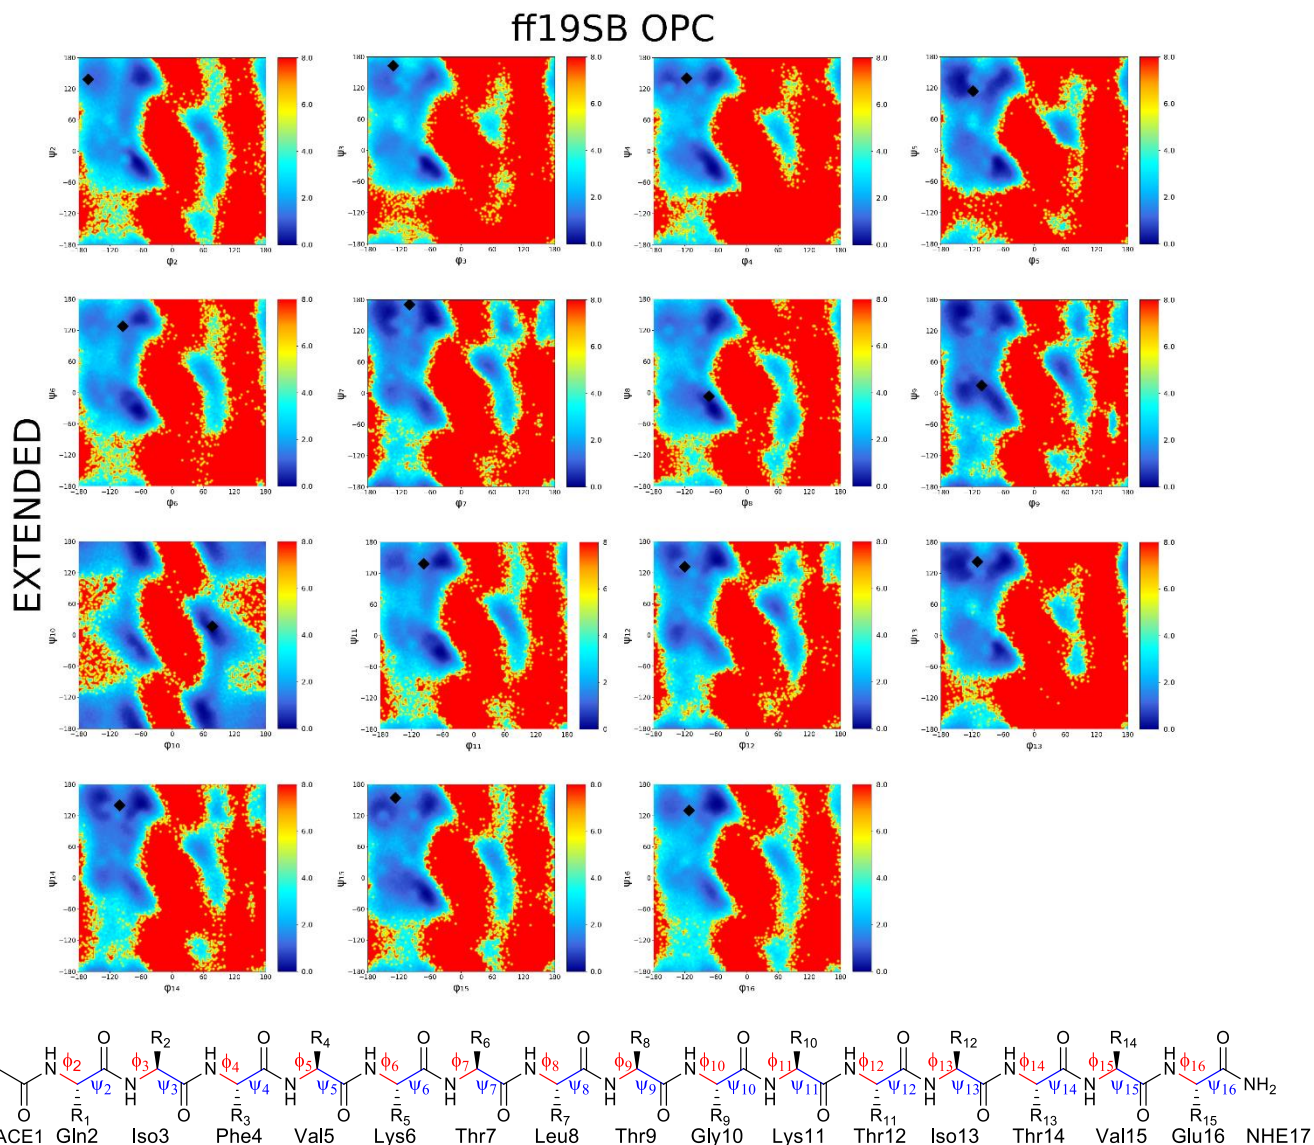

**Figure S78.** PMFs obtained from  $\phi$  and  $\psi$  dihedral distributions of B3 residues for the ff19SB/OPC combination from an extended conformation. PMFs are shown as heat maps (0.0 – 8.0 kcal/mol range) from dark blue to red. The native conformation's  $\phi$  and  $\psi$  angles are reported as black diamonds. B3 sequence and representation of  $\phi$  and  $\psi$  angles numbering are also shown.



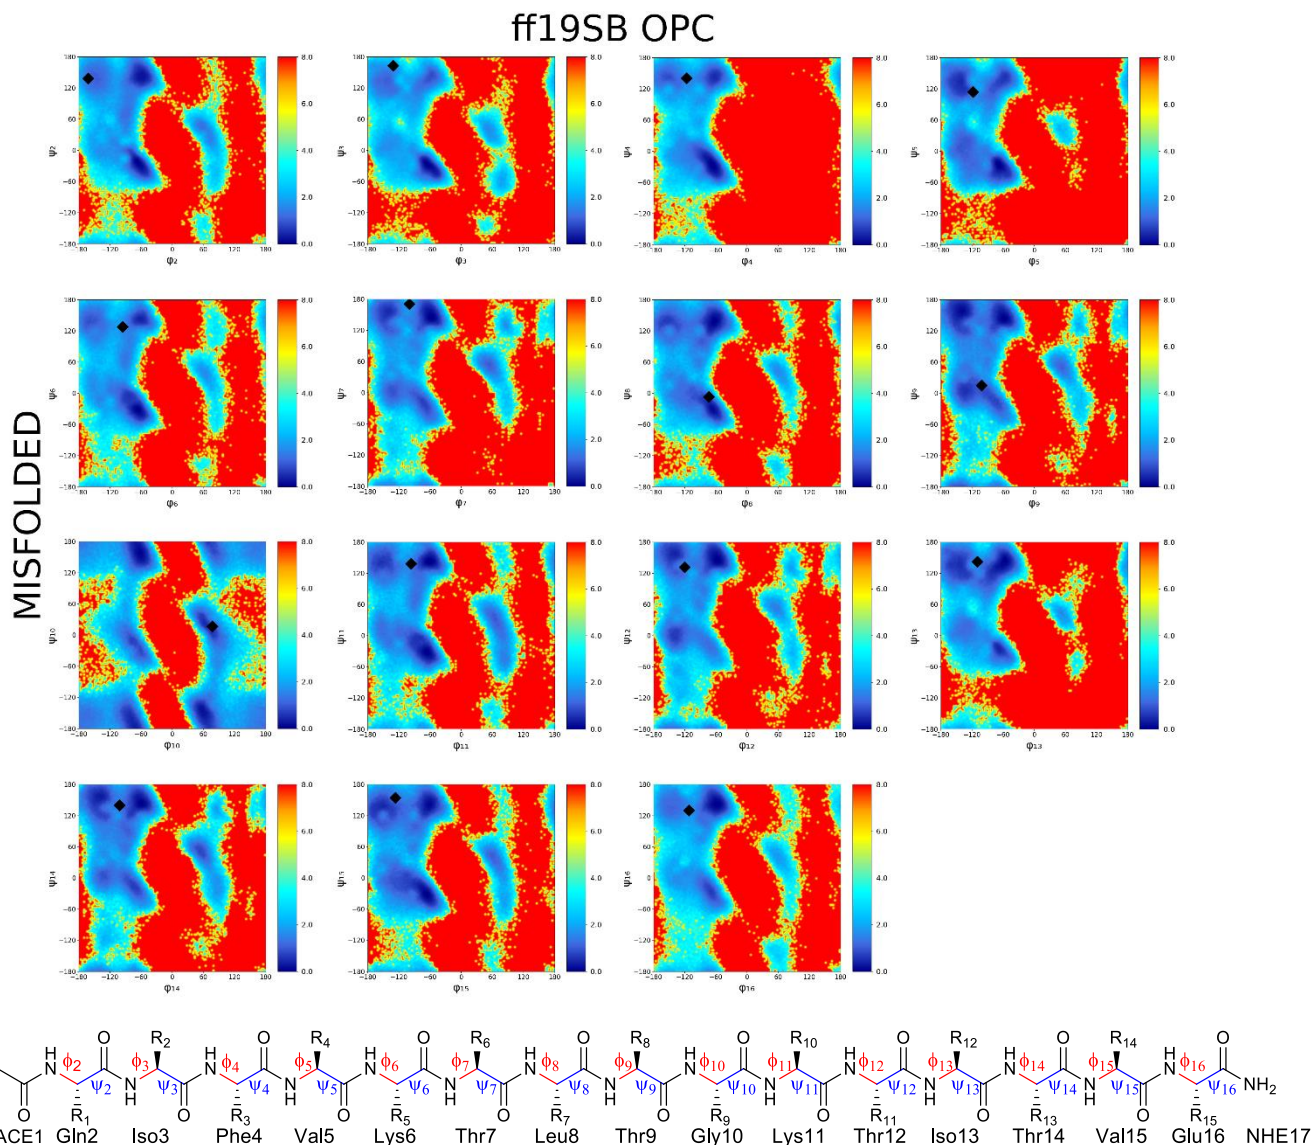

**Figure S79.** PMFs obtained from  $\phi$  and  $\psi$  dihedral distributions of B3 residues for the ff19SB/OPC combination from a misfolded conformation. PMFs are shown as heat maps (0.0 – 8.0 kcal/mol range) from dark blue to red. The native conformation's  $\phi$  and  $\psi$  angles are reported as black diamonds. B3 sequence and representation of  $\phi$  and  $\psi$  angles numbering are also shown.

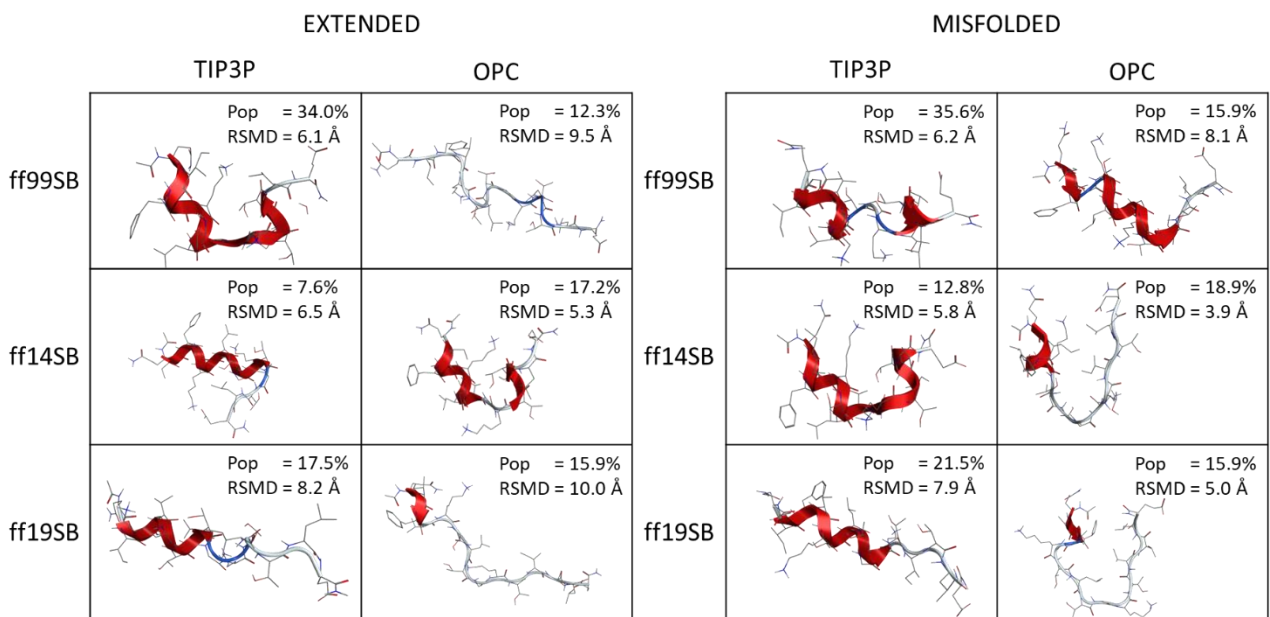

**Figure S80.** Representative conformation and population (pop%) of the second cluster from B3 trajectories. RMSD vs native structure are also shown.

**Table S8.** H-bond analyses from B3 trajectories. Only H-bonds involving the backbone are included in the table (donor N-H, acceptor C=O). Native H-bonds are highlighted in bold.

|            |  | NATIVE       |          |
|------------|--|--------------|----------|
| acceptor   |  | donor        | Distance |
| VAL5       |  | ILE13        | 2.72     |
| ILE13      |  | VAL5         | 2.79     |
| LYS11      |  | THR7         | 2.91     |
| ILE3       |  | LEU15        | 3.05     |
| LEU15      |  | ILE3         | 3.05     |
| THR7       |  | THR9         | 3.15     |
| THR7       |  | GLY10        | 3.37     |
| THR9       |  | LYS11        | 3.42     |
| LEU8       |  | GLY10        | 3.6      |
| VAL5       |  | THR7         | 3.9      |
| GLY10      |  | THR12        | 4.02     |
| ILE13      |  | LEU15        | 4.02     |
| PHE4       |  | LYS6         | 4.12     |
| LEU15      |  | NME          | 4.15     |
| THR12      |  | THR14        | 4.17     |
| LYS11      |  | ILE13        | 4.29     |
| THR7       |  | LYS11        | 4.3      |
| LYS6       |  | LEU8         | 4.43     |
| ILE3       |  | VAL5         | 4.45     |
| LEU15      |  | GLN2         | 4.47     |
| ff99SB OPC |  | ff99SB TIP3P |          |

| EXTENDED    |             |      |
|-------------|-------------|------|
| acceptor    | donor       | occ% |
| <b>ILE3</b> | <b>VAL5</b> | 7.07 |
| GLN2        | LYS6        | 6.25 |
| <b>PHE4</b> | <b>LYS6</b> | 5.83 |

| MISFOLDED |       |      |
|-----------|-------|------|
| acceptor  | donor | occ% |
| PHE4      | LEU8  | 8.69 |
| GLN2      | LYS6  | 8.12 |
| ILE3      | THR7  | 8.02 |
| VAL5      | THR9  | 6.34 |
| THR12     | GLU16 | 5.88 |
| ACE1      | ILE3  | 5.16 |

| EXTENDED    |              |       |
|-------------|--------------|-------|
| acceptor    | donor        | occ%  |
| GLN2        | LYS6         | 22.07 |
| ILE3        | THR7         | 21.90 |
| PHE4        | LEU8         | 21.28 |
| VAL5        | THR9         | 17.91 |
| THR12       | GLU16        | 17.33 |
| LYS6        | GLY10        | 16.09 |
| <b>THR7</b> | <b>LYS11</b> | 13.77 |
| THR9        | ILE13        | 12.93 |
| LYS11       | LEU15        | 11.46 |
| LEU8        | THR12        | 10.18 |
| GLY10       | THR14        | 9.42  |
| ILE3        | LYS6         | 8.74  |
| ACE1        | PHE4         | 8.45  |
| THR12       | LEU15        | 7.05  |
| ACE1        | VAL5         | 6.97  |
| GLN2        | VAL5         | 6.50  |
| LYS11       | GLU16        | 5.73  |

| MISFOLDED    |              |       |
|--------------|--------------|-------|
| acceptor     | donor        | occ%  |
| PHE4         | LEU8         | 24.76 |
| VAL5         | THR9         | 22.40 |
| GLN2         | LYS6         | 19.08 |
| LYS6         | GLY10        | 18.29 |
| ILE3         | THR7         | 16.13 |
| THR12        | GLU16        | 15.92 |
| <b>THR7</b>  | <b>LYS11</b> | 13.36 |
| THR9         | ILE13        | 11.74 |
| LEU8         | THR12        | 10.74 |
| GLY10        | THR14        | 8.63  |
| LYS11        | LEU15        | 8.39  |
| THR12        | LEU15        | 8.14  |
| GLN2         | VAL5         | 5.89  |
| ACE1         | ILE3         | 5.62  |
| ILE3         | LYS6         | 5.48  |
| ACE1         | PHE4         | 5.41  |
| <b>ILE3</b>  | <b>VAL5</b>  | 5.25  |
| <b>LYS11</b> | <b>ILE13</b> | 5.16  |

| ff14SB OPC  |              |       |             |              |       |
|-------------|--------------|-------|-------------|--------------|-------|
| EXTENDED    |              |       | MISFOLDED   |              |       |
| acceptor    | donor        | occ%  | acceptor    | donor        | occ%  |
| PHE4        | LEU8         | 34.19 | VAL5        | THR9         | 14.89 |
| VAL5        | THR9         | 29.81 | PHE4        | LEU8         | 13.29 |
| ILE3        | THR7         | 27.15 | ILE3        | THR7         | 9.79  |
| GLN2        | LYS6         | 23.29 | GLN2        | LYS6         | 8.99  |
| LYS6        | GLY10        | 17.73 | LYS6        | GLY10        | 8.41  |
| <b>THR7</b> | <b>LYS11</b> | 12.25 | <b>PHE4</b> | <b>LYS6</b>  | 6.13  |
| THR9        | ILE13        | 11.88 | LEU8        | THR12        | 6.02  |
| LEU8        | THR12        | 11.78 | THR9        | ILE13        | 5.94  |
| GLY10       | THR14        | 8.72  | <b>THR7</b> | <b>LYS11</b> | 5.93  |
| THR12       | GLU16        | 6.68  | THR12       | GLU16        | 5.52  |
| ACE1        | VAL5         | 5.89  | GLY10       | THR14        | 5.38  |
| LYS11       | LEU15        | 5.84  |             |              |       |
| GLN2        | VAL5         | 5.31  |             |              |       |

| ff14SB TIP3P |              |       |             |              |       |
|--------------|--------------|-------|-------------|--------------|-------|
| EXTENDED     |              |       | MISFOLDED   |              |       |
| acceptor     | donor        | occ%  | acceptor    | donor        | occ%  |
| PHE4         | LEU8         | 53.03 | PHE4        | LEU8         | 50.57 |
| VAL5         | THR9         | 51.95 | VAL5        | THR9         | 50.13 |
| <b>THR7</b>  | <b>LYS11</b> | 44.33 | LYS6        | GLY10        | 38.09 |
| GLN2         | LYS6         | 43.51 | GLN2        | LYS6         | 36.04 |
| THR9         | ILE13        | 40.66 | <b>THR7</b> | <b>LYS11</b> | 35.90 |
| ILE3         | THR7         | 40.28 | ILE3        | THR7         | 35.51 |
| LYS6         | GLY10        | 37.95 | THR9        | ILE13        | 34.71 |
| LEU8         | THR12        | 35.48 | LEU8        | THR12        | 28.11 |
| LYS11        | LEU15        | 23.08 | LYS11       | LEU15        | 22.87 |
| THR12        | GLU16        | 20.48 | THR12       | GLU16        | 21.59 |
| GLY10        | THR14        | 19.79 | GLY10       | THR14        | 20.92 |
| ACE1         | VAL5         | 12.19 | ACE1        | VAL5         | 9.90  |
| ACE1         | PHE4         | 8.72  | LYS11       | GLU16        | 8.93  |
| LYS11        | GLU16        | 6.66  | ACE1        | PHE4         | 7.17  |
| GLN2         | VAL5         | 6.50  | GLN2        | VAL5         | 5.47  |
|              |              |       | THR12       | LEU15        | 5.05  |

| ff19SB OPC   |             |      |           |       |      |
|--------------|-------------|------|-----------|-------|------|
| EXTENDED     |             |      | MISFOLDED |       |      |
| acceptor     | donor       | occ% | acceptor  | donor | occ% |
| GLN2         | LYS6        | 6.24 | GLN2      | LYS6  | 7.48 |
| ACE1         | PHE4        | 5.61 | GLN2      | VAL5  | 7.16 |
| GLN2         | VAL5        | 5.40 |           |       |      |
| <b>ILE13</b> | <b>VAL5</b> | 5.24 |           |       |      |

| ff19SB TIP3P |       |       |           |       |       |
|--------------|-------|-------|-----------|-------|-------|
| EXTENDED     |       |       | MISFOLDED |       |       |
| acceptor     | donor | occ%  | acceptor  | donor | occ%  |
| GLN2         | LYS6  | 17.75 | GLN2      | LYS6  | 17.52 |
| PHE4         | LEU8  | 13.10 | PHE4      | LEU8  | 15.49 |
| ILE3         | THR7  | 12.21 | ILE3      | THR7  | 14.31 |
| GLN2         | VAL5  | 10.37 | VAL5      | THR9  | 11.04 |

|      |       |      |
|------|-------|------|
| VAL5 | ILE13 | 5.10 |
|------|-------|------|

|       |       |      |
|-------|-------|------|
| VAL5  | THR9  | 9.34 |
| ACE1  | PHE4  | 8.68 |
| THR12 | LEU15 | 8.61 |
| THR12 | GLU16 | 6.44 |

|       |       |       |
|-------|-------|-------|
| GLN2  | VAL5  | 10.72 |
| ACE1  | PHE4  | 8.58  |
| THR12 | LEU15 | 6.64  |
| PHE4  | THR7  | 5.78  |
| LYS6  | GLY10 | 5.31  |
| THR12 | GLU16 | 5.10  |

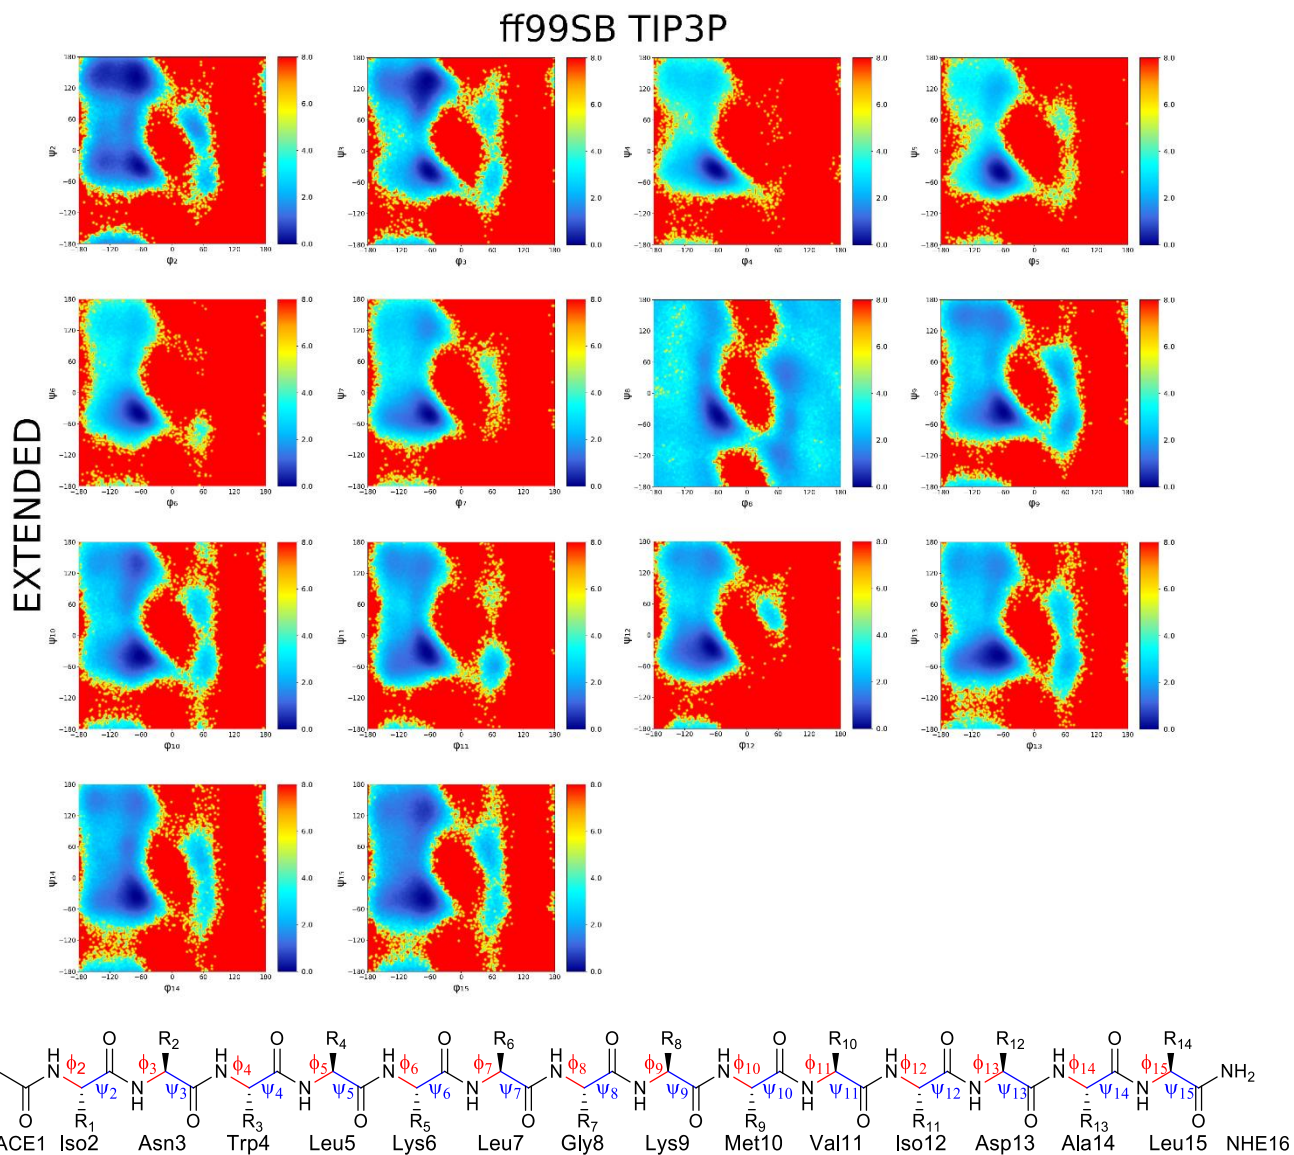

**Figure S81.** PMFs obtained from  $\phi$  and  $\psi$  dihedral distributions of ID1 residues for the ff99SB/TIP3P combination from an extended conformation. PMFs are shown as heat maps (0.0 – 8.0 kcal/mol range) from dark blue to red. The native conformation's  $\phi$  and  $\psi$  angles are reported as black diamonds. ID1 sequence and representation of  $\phi$  and  $\psi$  angles numbering are also shown.

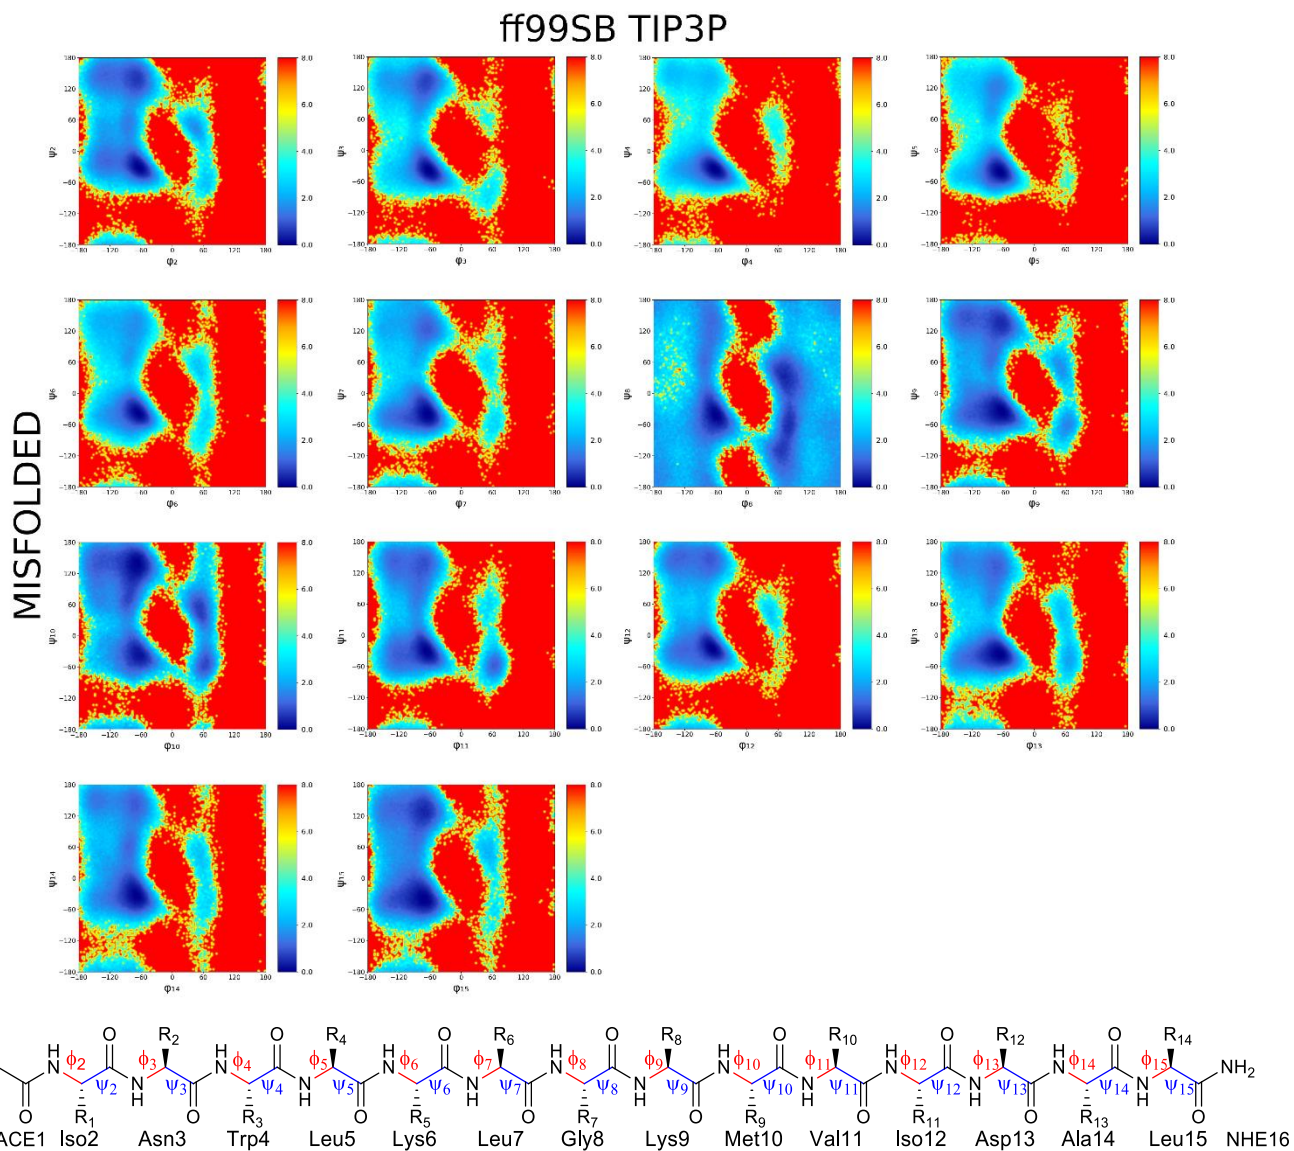

**Figure S82.** PMFs obtained from  $\phi$  and  $\psi$  dihedral distributions of ID1 residues for the ff99SB/TIP3P combination from a misfolded conformation. PMFs are shown as heat maps (0.0 – 8.0 kcal/mol range) from dark blue to red. The native conformation's  $\phi$  and  $\psi$  angles are reported as black diamonds. ID1 sequence and representation of  $\phi$  and  $\psi$  angles numbering are also shown.

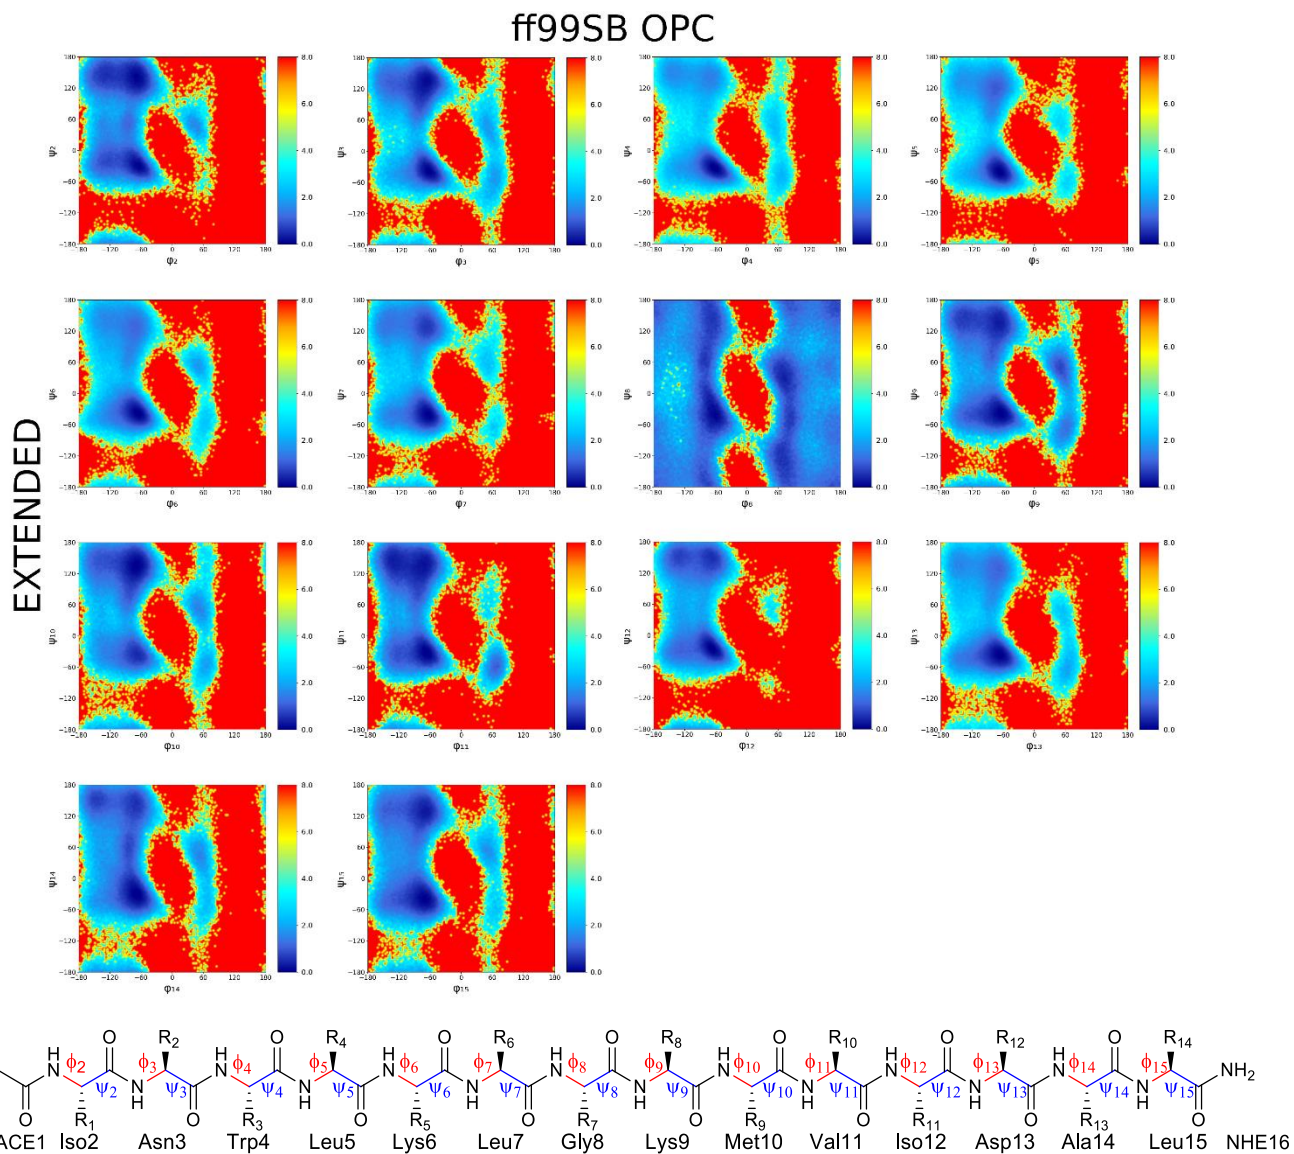

**Figure S83.** PMFs obtained from  $\phi$  and  $\psi$  dihedral distributions of ID1 residues for the ff99SB/OPC combination from an extended conformation. PMFs are shown as heat maps (0.0 – 8.0 kcal/mol range) from dark blue to red. The native conformation's  $\phi$  and  $\psi$  angles are reported as black diamonds. ID1 sequence and representation of  $\phi$  and  $\psi$  angles numbering are also shown.

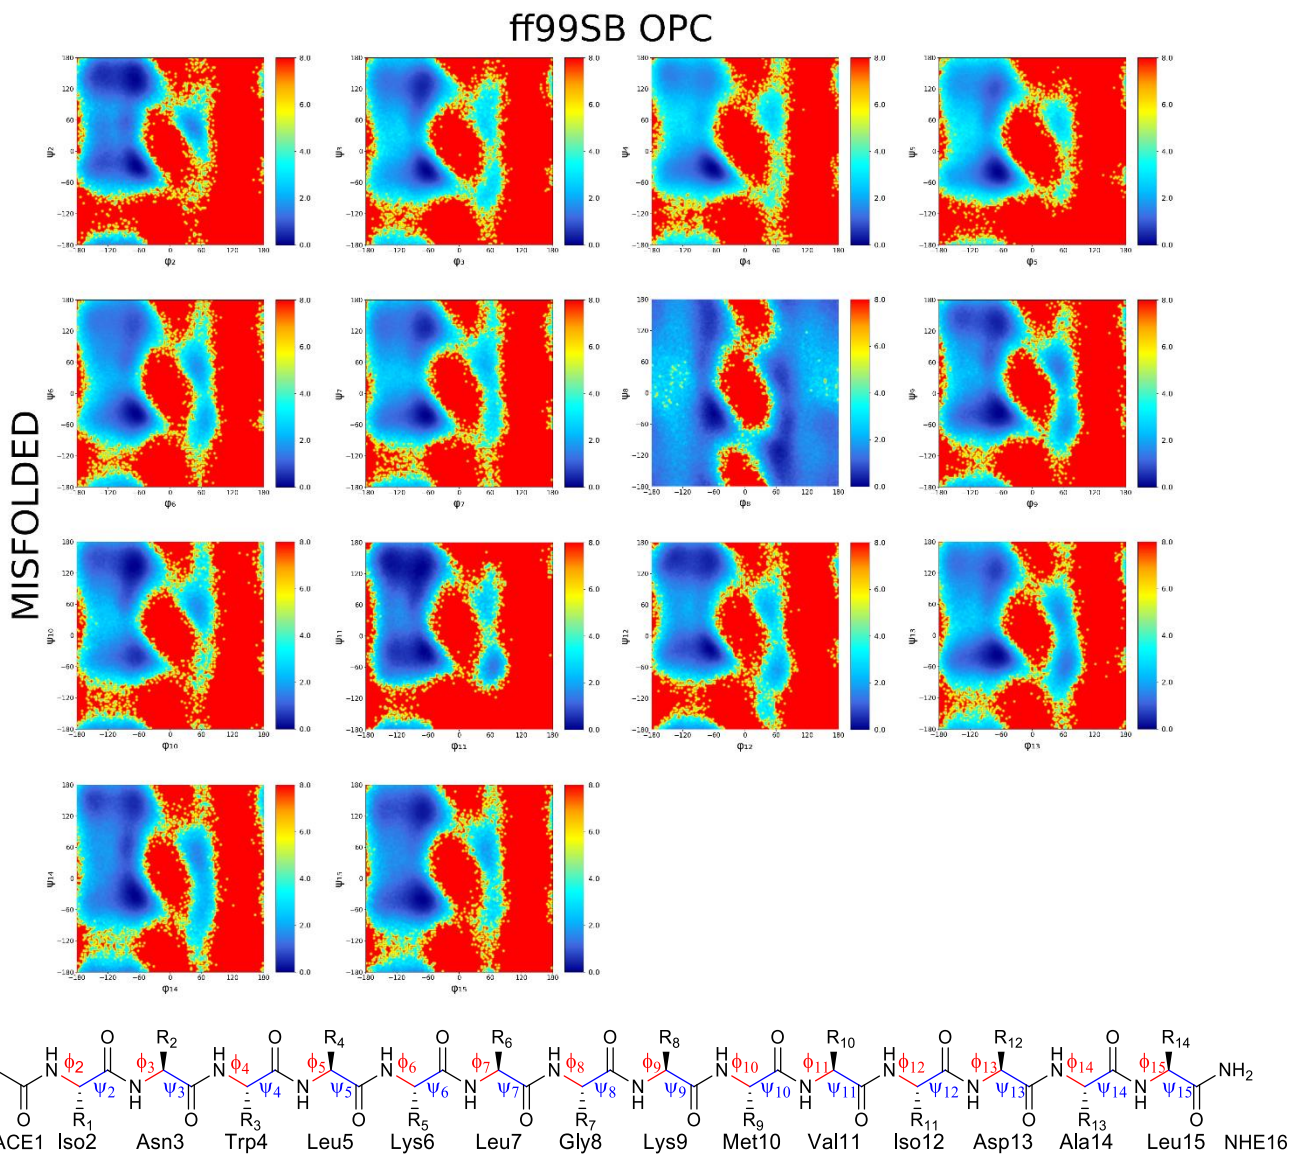

**Figure S84.** PMFs obtained from  $\phi$  and  $\psi$  dihedral distributions of ID1 residues for the ff99SB/OPC combination from a misfolded conformation. PMFs are shown as heat maps (0.0 – 8.0 kcal/mol range) from dark blue to red. The native conformation's  $\phi$  and  $\psi$  angles are reported as black diamonds. ID1 sequence and representation of  $\phi$  and  $\psi$  angles numbering are also shown.

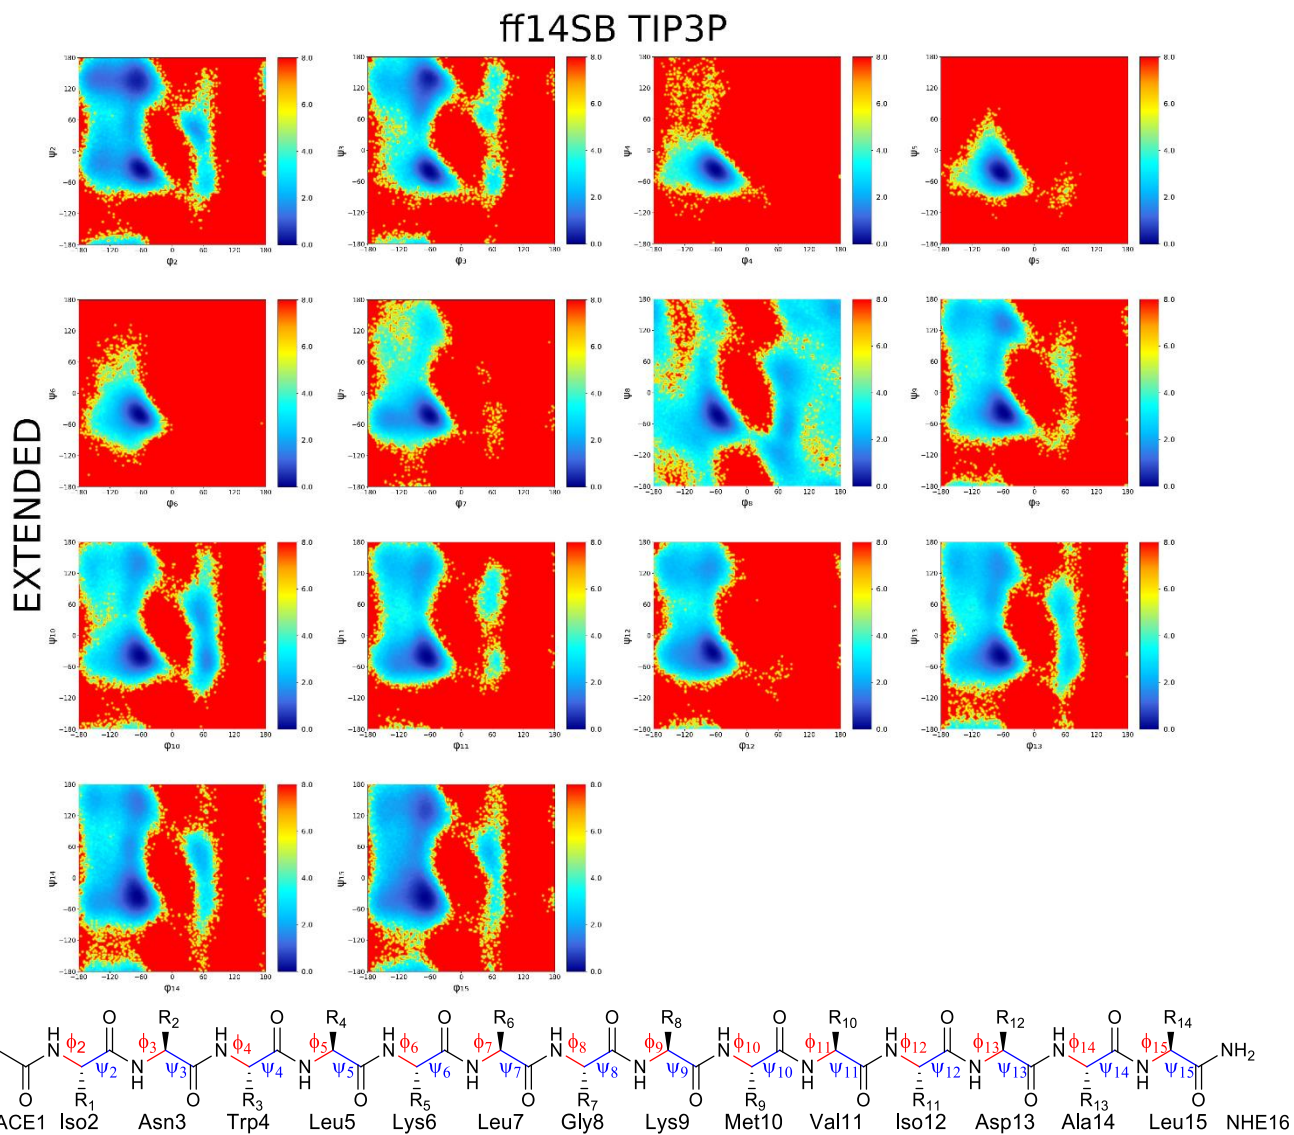

**Figure S85.** PMFs obtained from  $\phi$  and  $\psi$  dihedral distributions of ID1 residues for the ff14SB/TIP3P combination from an extended conformation. PMFs are shown as heat maps (0.0 – 8.0 kcal/mol range) from dark blue to red. The native conformation's  $\phi$  and  $\psi$  angles are reported as black diamonds. ID1 sequence and representation of  $\phi$  and  $\psi$  angles numbering are also shown.



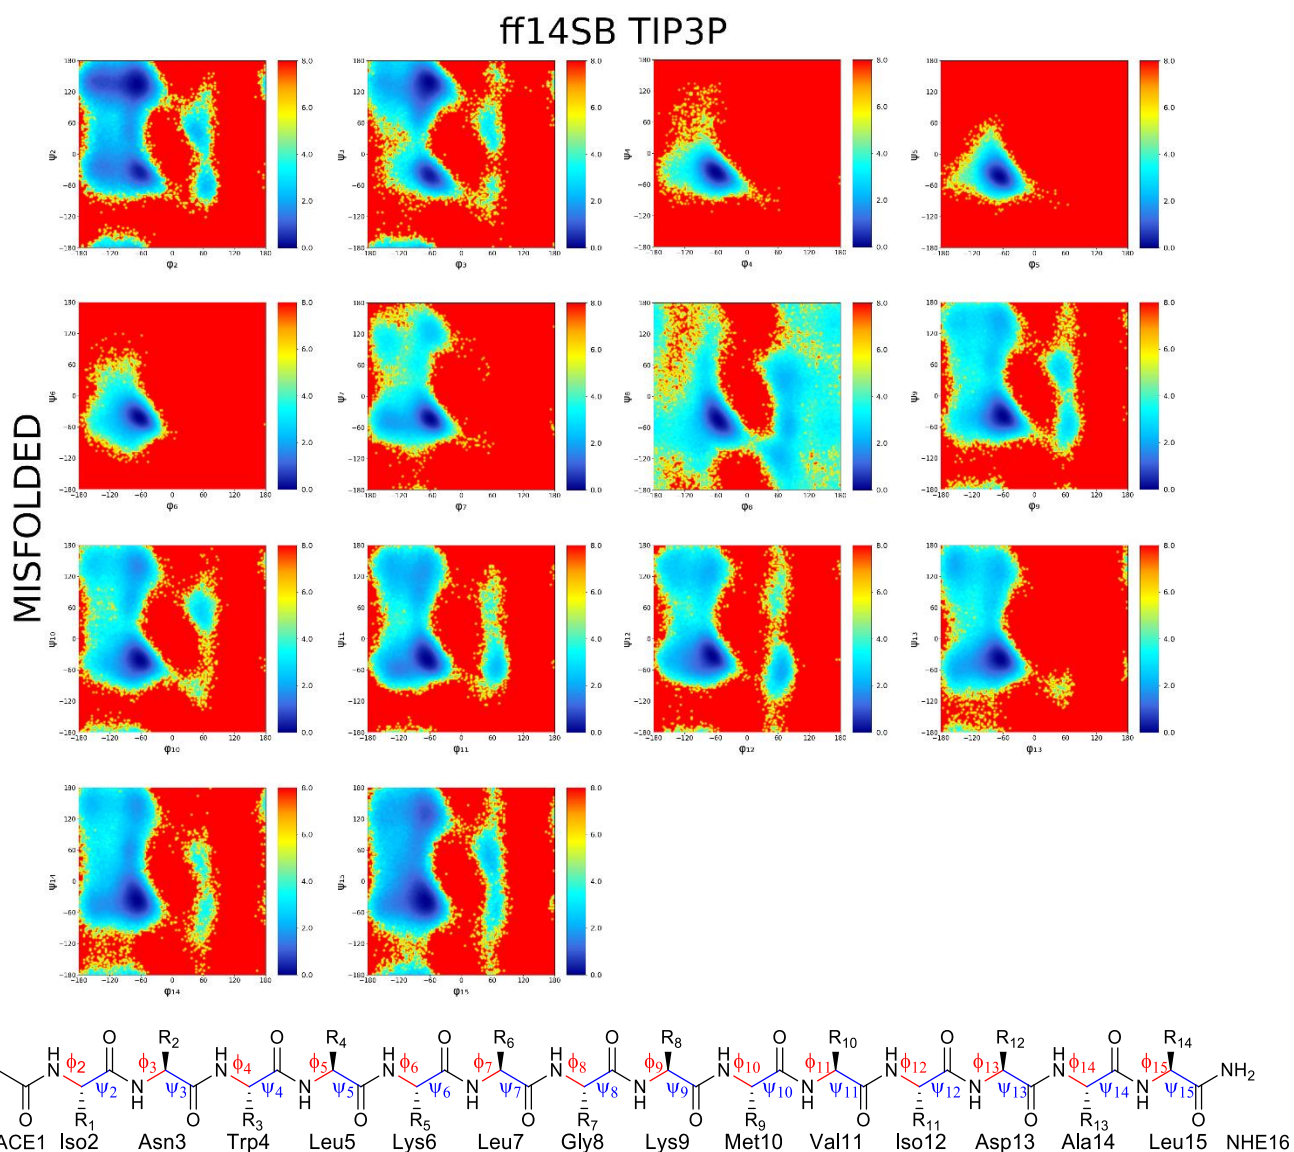

**Figure S86.** PMFs obtained from  $\phi$  and  $\psi$  dihedral distributions of ID1 residues for the ff14SB/TIP3P combination from a misfolded conformation. PMFs are shown as heat maps (0.0 – 8.0 kcal/mol range) from dark blue to red. The native conformation's  $\phi$  and  $\psi$  angles are reported as black diamonds. ID1 sequence and representation of  $\phi$  and  $\psi$  angles numbering are also shown.

### ff14SB OPC

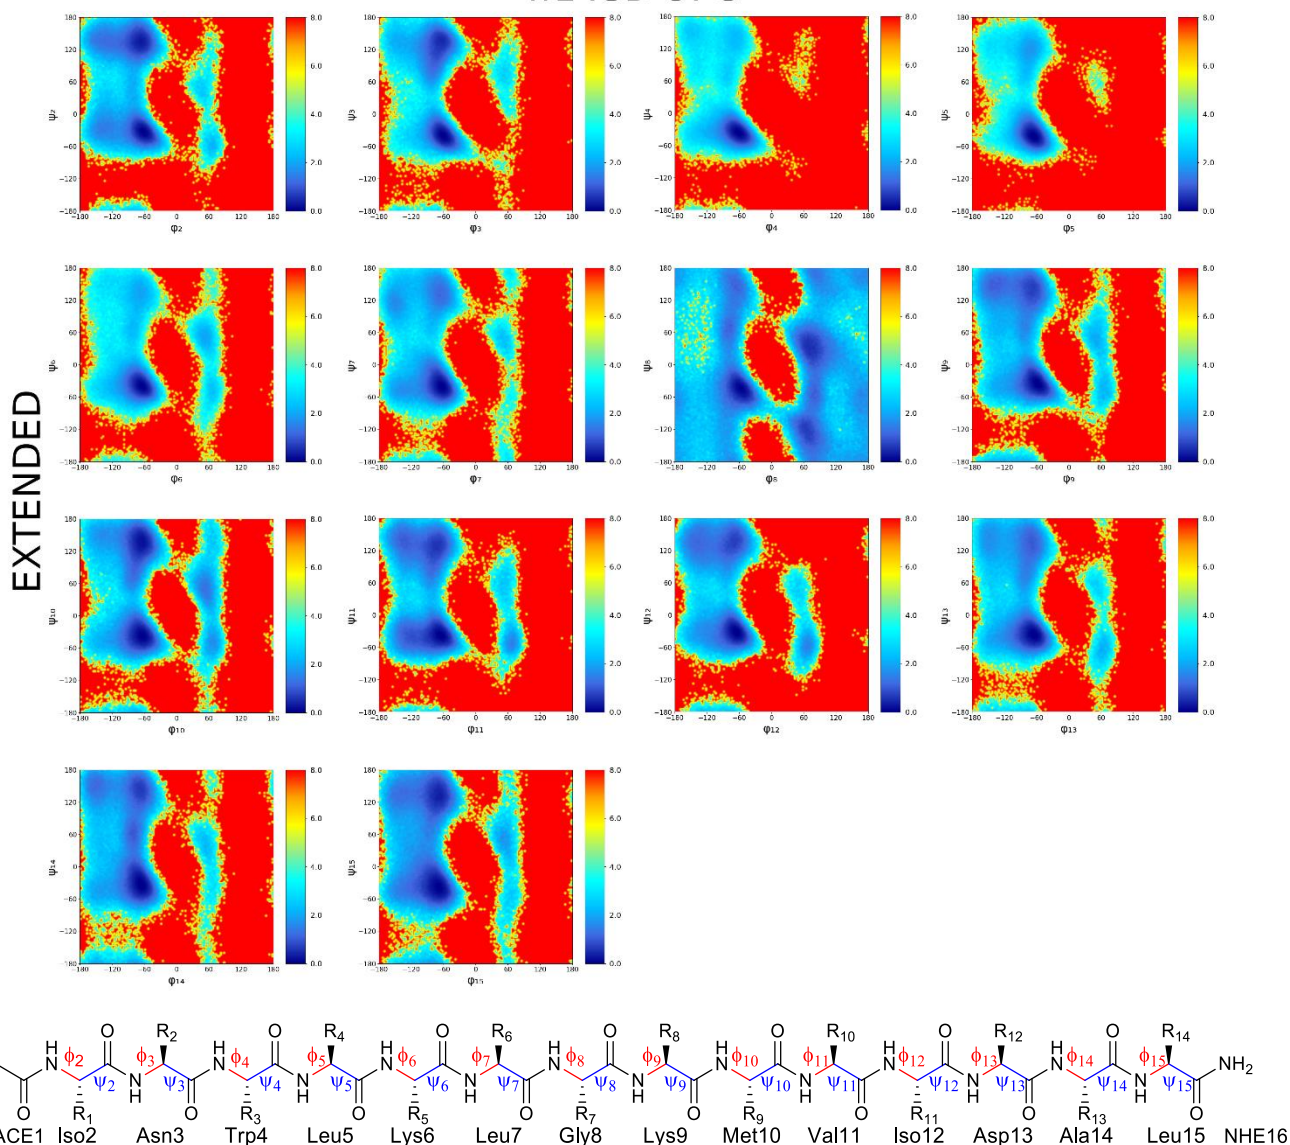

**Figure S87.** PMFs obtained from  $\phi$  and  $\psi$  dihedral distributions of ID1 residues for the ff14SB/OPC combination from an extended conformation. PMFs are shown as heat maps (0.0 – 8.0 kcal/mol range) from dark blue to red. The native conformation's  $\phi$  and  $\psi$  angles are reported as black diamonds. ID1 sequence and representation of  $\phi$  and  $\psi$  angles numbering are also shown.

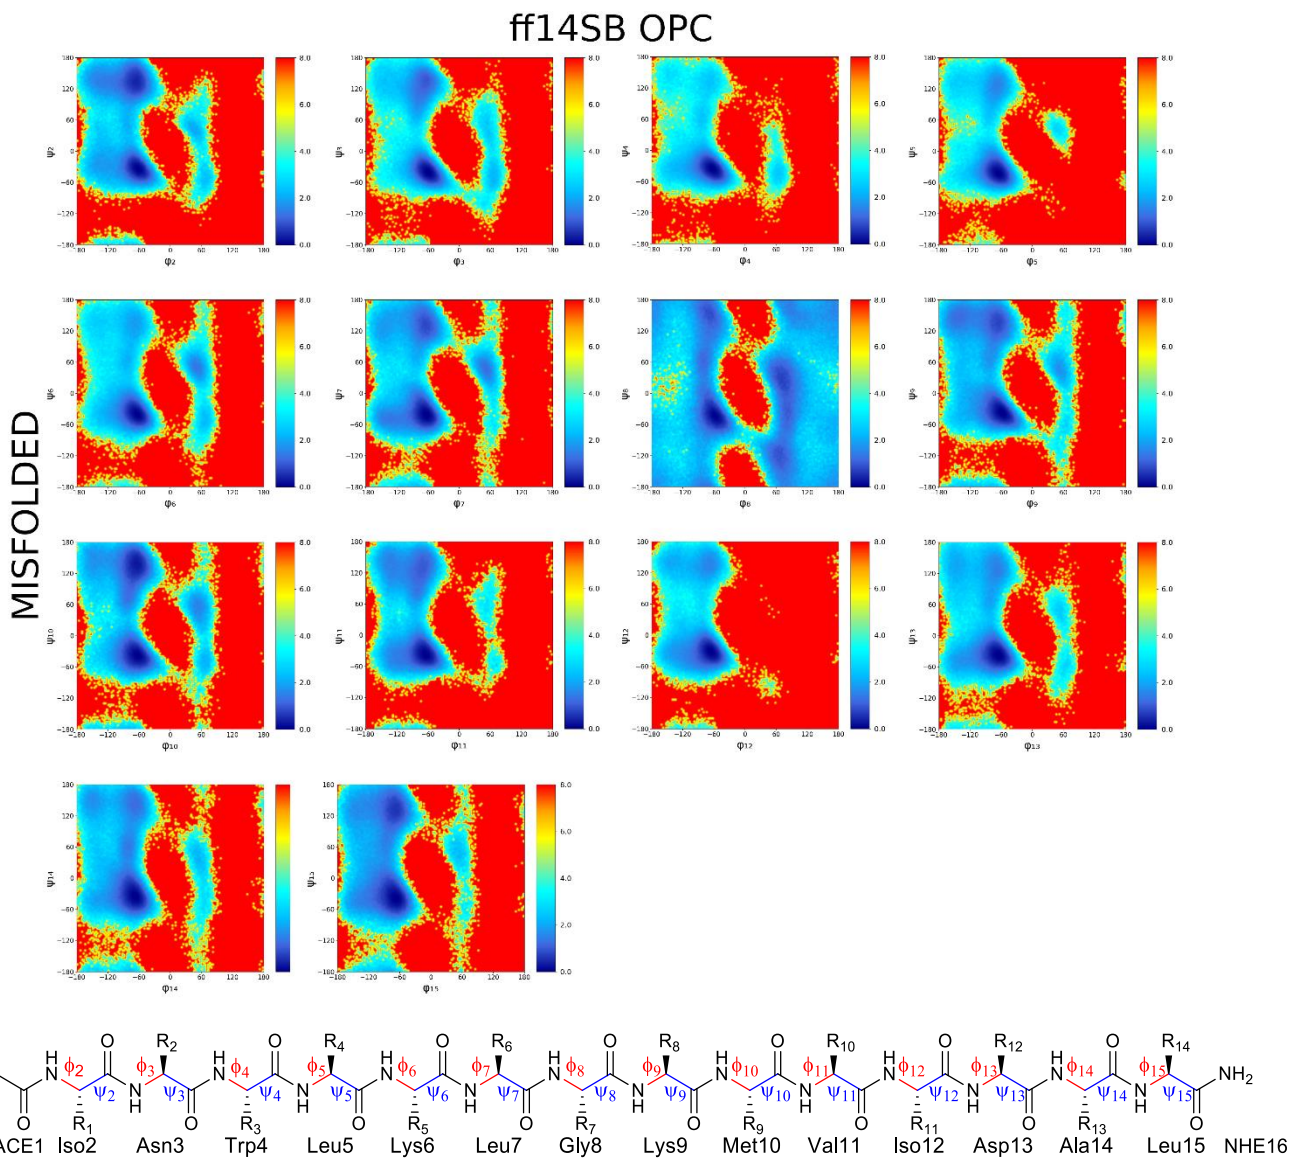

**Figure S88.** PMFs obtained from  $\phi$  and  $\psi$  dihedral distributions of ID1 residues for the ff14SB/OPC combination from a misfolded conformation. PMFs are shown as heat maps (0.0 – 8.0 kcal/mol range) from dark blue to red. The native conformation's  $\phi$  and  $\psi$  angles are reported as black diamonds. ID1 sequence and representation of  $\phi$  and  $\psi$  angles numbering are also shown.

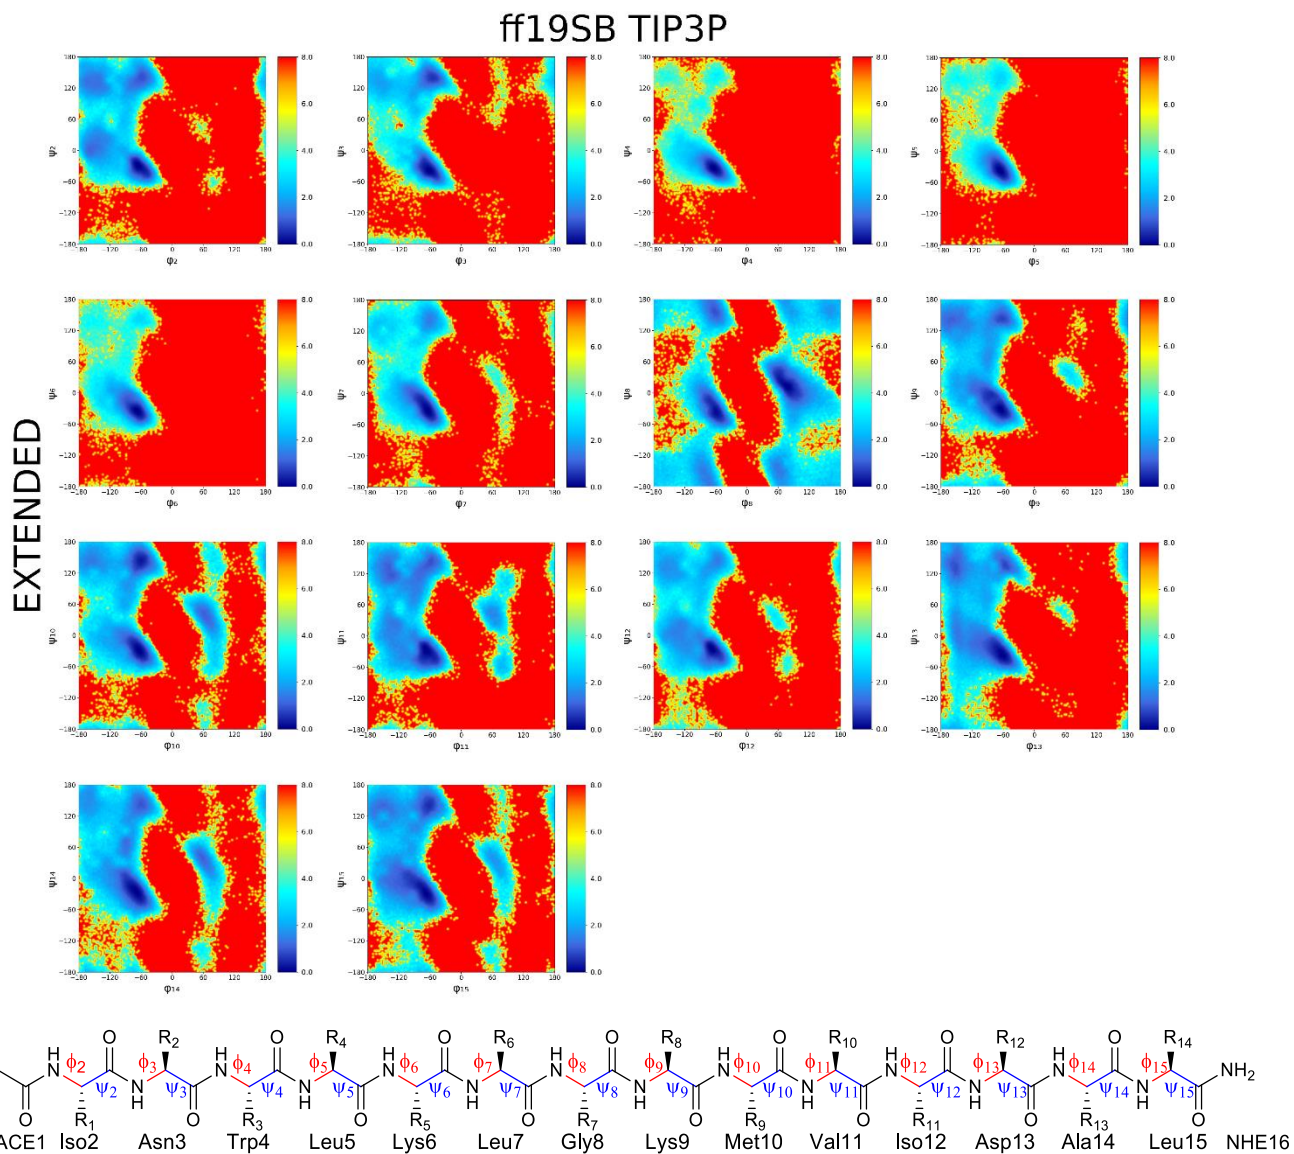

**Figure S89.** PMFs obtained from  $\phi$  and  $\psi$  dihedral distributions of ID1 residues for the ff19SB/TIP3P combination from an extended conformation. PMFs are shown as heat maps (0.0 – 8.0 kcal/mol range) from dark blue to red. The native conformation's  $\phi$  and  $\psi$  angles are reported as black diamonds. ID1 sequence and representation of  $\phi$  and  $\psi$  angles numbering are also shown.

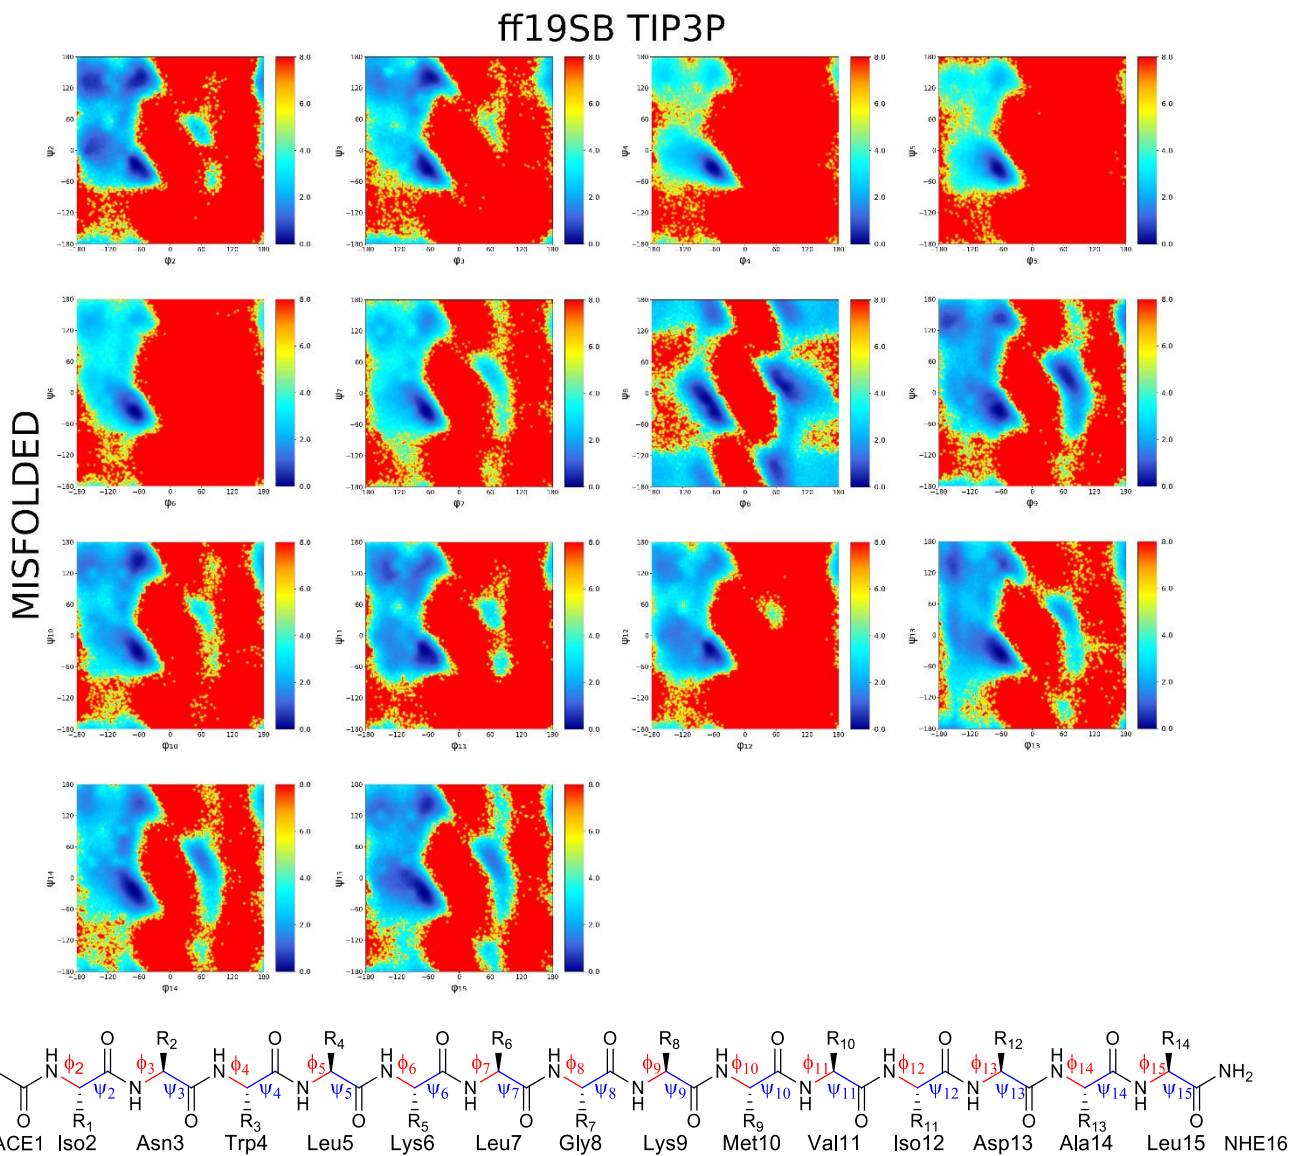

**Figure S90.** PMFs obtained from  $\phi$  and  $\psi$  dihedral distributions of ID1 residues for the ff19SB/TIP3P combination from a misfolded conformation. PMFs are shown as heat maps (0.0 – 8.0 kcal/mol range) from dark blue to red. The native conformation's  $\phi$  and  $\psi$  angles are reported as black diamonds. ID1 sequence and representation of  $\phi$  and  $\psi$  angles numbering are also shown.

### ff19SB OPC

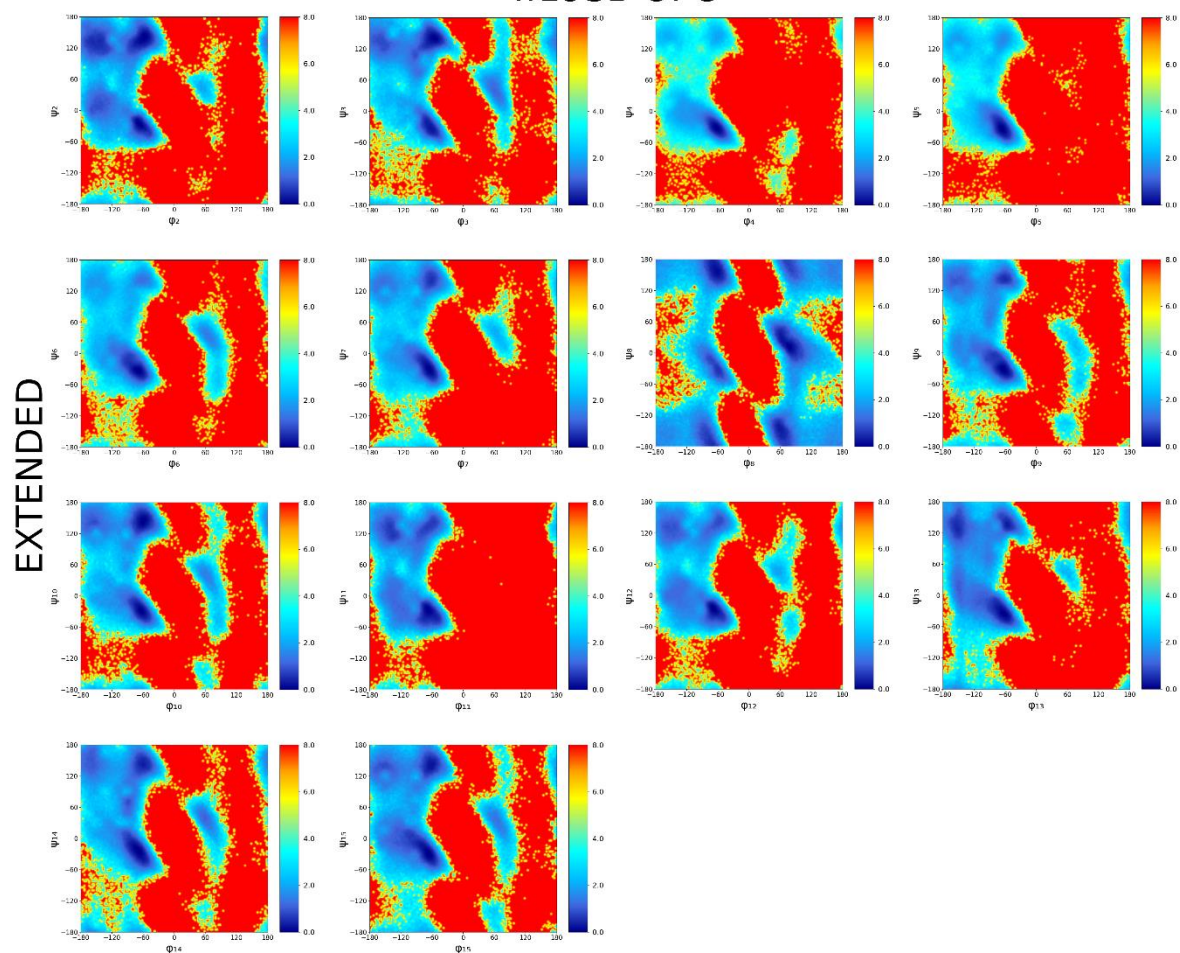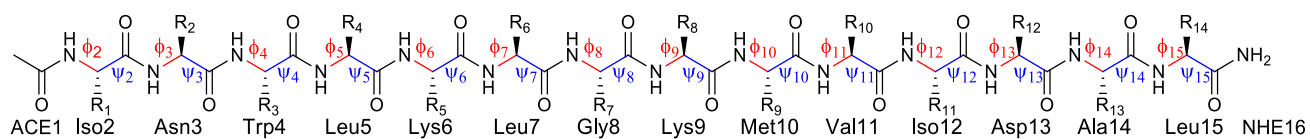

**Figure S91.** PMFs obtained from  $\phi$  and  $\psi$  dihedral distributions of ID1 residues for the ff19SB/OPC combination from an extended conformation. PMFs are shown as heat maps (0.0 – 8.0 kcal/mol range) from dark blue to red. The native conformation's  $\phi$  and  $\psi$  angles are reported as black diamonds. ID1 sequence and representation of  $\phi$  and  $\psi$  angles numbering are also shown.

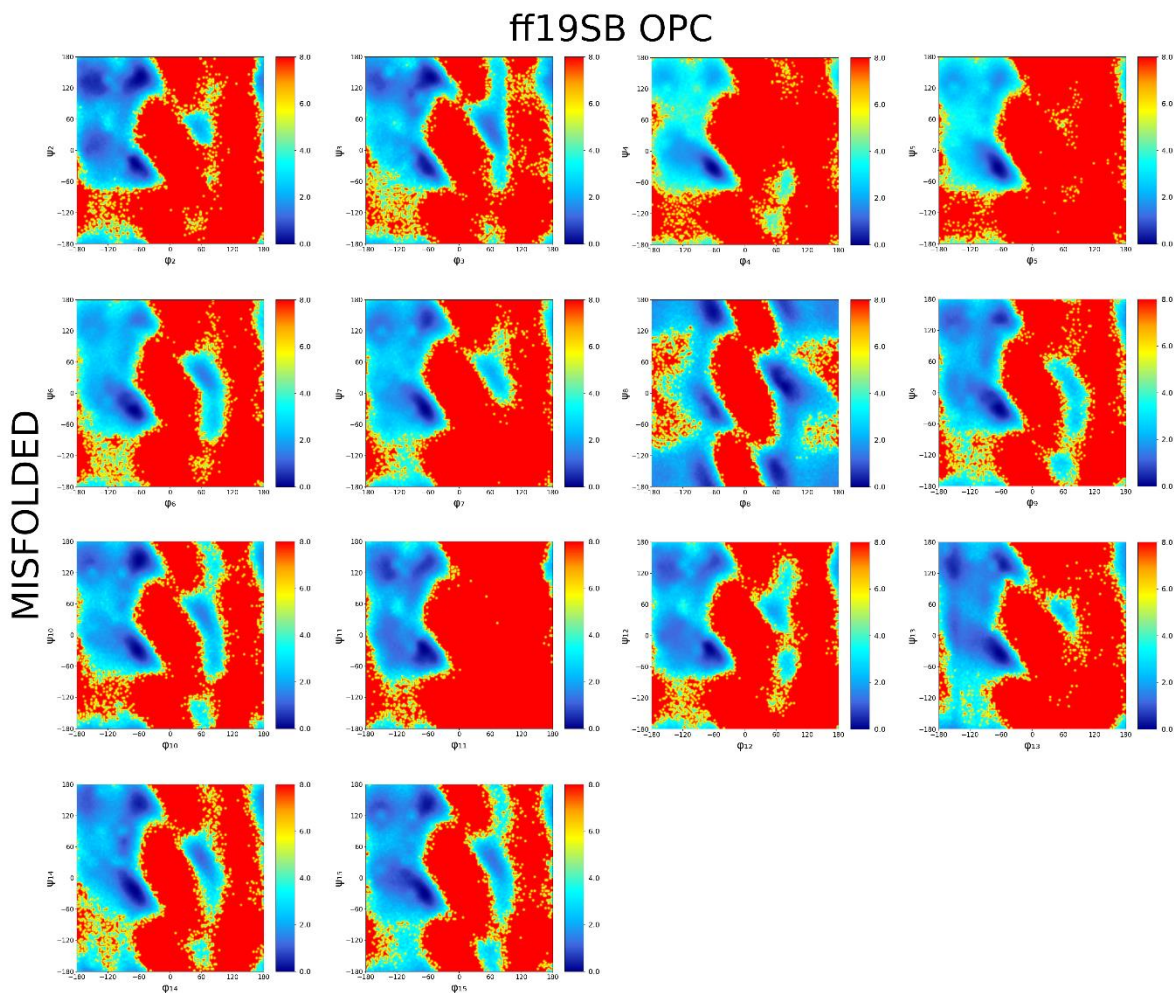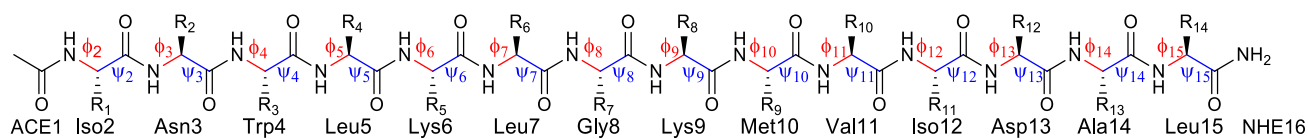

**Figure S92.** PMFs obtained from  $\phi$  and  $\psi$  dihedral distributions of ID1 residues for the ff19SB/OPC combination from a misfolded conformation. PMFs are shown as heat maps (0.0 – 8.0 kcal/mol range) from dark blue to red. The native conformation's  $\phi$  and  $\psi$  angles are reported as black diamonds. ID1 sequence and representation of  $\phi$  and  $\psi$  angles numbering are also shown.

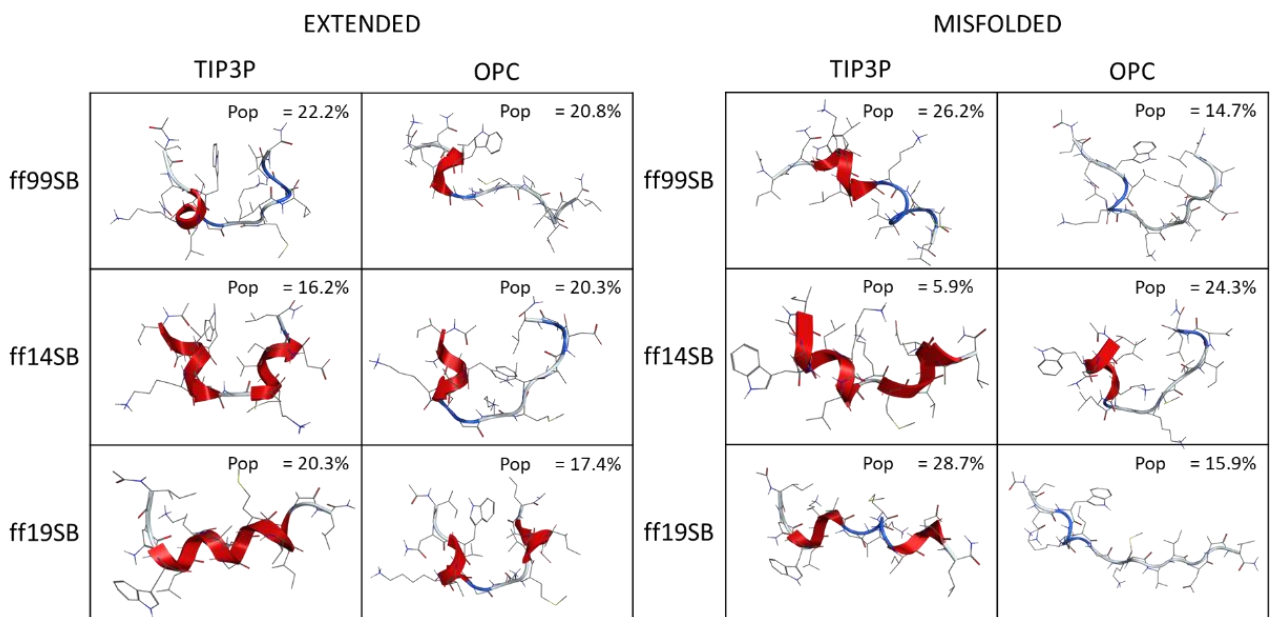

**Figure S93.** Representative conformation and population (pop%) of the second clusters from ID1 trajectories.

**Table S9.** H-bond analyses from ID1 trajectories. Only H-bonds involving the backbone are included in the table (donor N-H, acceptor C=O). Native H-bonds are highlighted in bold.

| ff99SB OPC |       |       |           |       |       |
|------------|-------|-------|-----------|-------|-------|
| EXTENDED   |       |       | MISFOLDED |       |       |
| acceptor   | donor | occ%  | acceptor  | donor | occ%  |
| ASN3       | LEU7  | 19.47 | ASN3      | LEU7  | 15.24 |
| TRP4       | GLY8  | 13.95 | TRP4      | GLY8  | 10.11 |
| VAL11      | LEU15 | 6.93  | ILE2      | LYS6  | 7.64  |
| ILE2       | LYS6  | 6.57  |           |       |       |

| ff99SB TIP3P |       |       |           |       |       |           |       |       |
|--------------|-------|-------|-----------|-------|-------|-----------|-------|-------|
| EXTENDED     |       |       | MISFOLDED |       |       | MISFOLDED |       |       |
| acceptor     | donor | occ%  | acceptor  | donor | occ%  | acceptor  | donor | occ%  |
| ASN3         | LEU7  | 34.89 | ASN3      | LEU7  | 15.24 | ASN3      | LEU7  | 28.27 |
| TRP4         | GLY8  | 28.97 | TRP4      | GLY8  | 10.11 | TRP4      | GLY8  | 17.39 |
| MET10        | ALA14 | 15.99 | ILE2      | LYS6  | 7.64  | ILE2      | LYS6  | 17.07 |
| LEU7         | VAL11 | 14.86 | TRP4      | LYS9  | 11.69 | TRP4      | LYS9  | 12.50 |
| VAL11        | LEU15 | 14.50 | LYS6      | MET10 | 10.72 | VAL11     | LEU15 | 11.37 |
| LYS9         | ASP13 | 12.16 | GLY8      | ILE12 | 9.99  | ACE1      | LEU5  | 10.64 |
| LEU5         | LYS9  | 12.14 | ILE2      | LYS6  | 9.10  | MET10     | ALA14 | 8.04  |
| TRP4         | LYS9  | 11.69 | MET10     | ASP13 | 7.25  | ILE2      | LEU5  | 7.02  |
| LYS6         | MET10 | 10.72 | ASN3      | GLY8  | 6.49  | GLY8      | ILE12 | 6.15  |
| GLY8         | ILE12 | 9.99  | MET10     | LEU15 | 6.36  | LEU7      | LYS9  | 5.98  |
| ILE2         | LYS6  | 9.10  | ASN3      | LYS6  | 5.88  | ASN3      | GLY8  | 5.86  |
| MET10        | ASP13 | 7.25  | LEU7      | MET10 | 5.81  | LYS9      | VAL11 | 5.53  |
| ASN3         | GLY8  | 6.49  |           |       |       | MET10     | ASP13 | 5.38  |
| MET10        | LEU15 | 6.36  |           |       |       | MET10     | ILE12 | 5.19  |
| ASN3         | LYS6  | 5.88  |           |       |       | VAL11     | ALA14 | 5.19  |
| LEU7         | MET10 | 5.81  |           |       |       |           |       |       |

| ff14SB OPC |       |      |           |       |      |
|------------|-------|------|-----------|-------|------|
| EXTENDED   |       |      | MISFOLDED |       |      |
| acceptor   | donor | occ% | acceptor  | donor | occ% |
|            |       |      |           |       |      |

| ff14SB TIP3P |       |      |           |       |      |           |       |      |
|--------------|-------|------|-----------|-------|------|-----------|-------|------|
| EXTENDED     |       |      | MISFOLDED |       |      | MISFOLDED |       |      |
| acceptor     | donor | occ% | acceptor  | donor | occ% | acceptor  | donor | occ% |
|              |       |      |           |       |      |           |       |      |



|       |       |       |
|-------|-------|-------|
| ASN3  | LEU7  | 29.46 |
| TRP4  | GLY8  | 19.73 |
| ILE2  | LYS6  | 13.91 |
| TRP4  | LYS9  | 10.69 |
| GLY8  | ILE12 | 10.11 |
| VAL11 | LEU15 | 8.97  |
| ACE1  | LEU5  | 8.90  |
| MET10 | ALA14 | 7.05  |
| GLY8  | VAL11 | 6.12  |
| ASN3  | LYS6  | 5.58  |
| LEU7  | VAL11 | 5.52  |
| LYS9  | ASP13 | 5.47  |

|       |       |       |
|-------|-------|-------|
| ASN3  | LEU7  | 27.03 |
| ILE2  | LYS6  | 20.96 |
| TRP4  | GLY8  | 16.92 |
| VAL11 | LEU15 | 14.70 |
| MET10 | ALA14 | 11.98 |
| ACE1  | LEU5  | 11.43 |
| LYS9  | ASP13 | 9.76  |
| GLY8  | ILE12 | 8.38  |
| TRP4  | LYS9  | 8.25  |
| ILE2  | LEU5  | 6.61  |
| LEU7  | VAL11 | 5.78  |
| VAL11 | ALA14 | 5.75  |
| LEU5  | LYS9  | 5.56  |
| GLY8  | VAL11 | 5.11  |
| MET10 | ASP13 | 5.04  |

|       |       |       |
|-------|-------|-------|
| ASN3  | LEU7  | 44.94 |
| TRP4  | GLY8  | 34.08 |
| LEU7  | VAL11 | 21.72 |
| GLY8  | ILE12 | 20.38 |
| LEU5  | LYS9  | 20.37 |
| VAL11 | LEU15 | 19.04 |
| ILE2  | LYS6  | 18.77 |
| LYS6  | MET10 | 18.20 |
| LYS9  | ASP13 | 18.05 |
| MET10 | ALA14 | 15.95 |
| TRP4  | LYS9  | 12.66 |
| ACE1  | LEU5  | 10.67 |
| GLY8  | VAL11 | 7.00  |
| LEU7  | MET10 | 6.15  |
| GLY8  | ASP13 | 5.71  |

|       |       |       |
|-------|-------|-------|
| TRP5  | TYR9  | 49.83 |
| TYR9  | TYR13 | 40.46 |
| GLU7  | LEU11 | 39.56 |
| LEU8  | LYS12 | 37.93 |
| THR4  | LEU8  | 34.15 |
| GLN6  | GLN10 | 33.25 |
| GLN10 | LYS14 | 26.96 |
| LEU3  | GLU7  | 19.75 |
| LYS2  | GLN6  | 15.38 |
| LEU11 | GLY15 | 10.46 |
| ACE1  | TRP5  | 10.39 |
| GLN10 | GLY15 | 7.91  |
| THR4  | GLU7  | 7.42  |
| TYR9  | LYS14 | 6.00  |

| ff19SB OPC |       |       |           |       |       |
|------------|-------|-------|-----------|-------|-------|
| EXTENDED   |       |       | MISFOLDED |       |       |
| acceptor   | donor | occ%  | acceptor  | donor | occ%  |
| ASN3       | LEU7  | 18.17 | LEU8      | LYS12 | 34.48 |
| ASN3       | LYS6  | 11.41 | TRP5      | TYR9  | 32.19 |
| TRP4       | GLY8  | 10.93 | TYR9      | LYS14 | 26.75 |
| TRP4       | LYS9  | 6.03  | LEU3      | GLU7  | 25.95 |
| GLY8       | VAL11 | 5.81  | TYR9      | TYR13 | 25.33 |
| LYS9       | ASP13 | 5.09  | GLU7      | LEU11 | 24.86 |
|            |       |       | GLN6      | GLN10 | 23.14 |
|            |       |       | THR4      | LEU8  | 22.81 |
|            |       |       | TRP5      | GLN10 | 17.07 |
|            |       |       | LEU8      | TYR13 | 16.75 |
|            |       |       | LYS2      | GLN6  | 15.89 |
|            |       |       | GLN10     | GLY15 | 15.70 |
|            |       |       | ACE1      | TRP5  | 14.54 |
|            |       |       | GLN10     | LYS14 | 13.21 |
|            |       |       | GLU7      | LYS12 | 11.39 |
|            |       |       | GLN6      | LEU11 | 11.02 |
|            |       |       | LEU3      | LEU8  | 10.15 |
|            |       |       | ACE1      | GLN6  | 8.00  |
|            |       |       | LEU11     | ILE16 | 7.72  |
|            |       |       | THR4      | TYR9  | 7.66  |
|            |       |       | LEU11     | GLY15 | 7.02  |
|            |       |       | GLN10     | ILE16 | 5.63  |
|            |       |       | LEU3      | GLN6  | 5.45  |

| ff19SB TIP3P |       |       |           |       |       |
|--------------|-------|-------|-----------|-------|-------|
| EXTENDED     |       |       | MISFOLDED |       |       |
| acceptor     | donor | occ%  | acceptor  | donor | occ%  |
| ASN3         | LEU7  | 35.90 | GLU7      | LEU11 | 39.46 |
| TRP4         | GLY8  | 20.21 | TRP5      | TYR9  | 37.55 |
| ILE2         | LYS6  | 19.84 | LEU8      | LYS12 | 30.56 |
| TRP4         | LYS9  | 14.58 | TYR9      | TYR13 | 27.23 |
| ACE1         | LEU5  | 12.13 | THR4      | LEU8  | 27.00 |
| LEU5         | GLY8  | 9.42  | GLN10     | LYS14 | 21.80 |
| VAL11        | LEU15 | 9.06  | GLN6      | GLN10 | 20.30 |
| ASN3         | LYS6  | 8.35  | GLU7      | GLN10 | 9.53  |
| LYS9         | ASP13 | 7.68  | LEU11     | GLY15 | 9.03  |
| MET10        | ALA14 | 7.08  | THR4      | GLU7  | 8.81  |
| LEU5         | LYS9  | 6.80  | TYR9      | LYS12 | 6.21  |
| VAL11        | ALA14 | 6.30  | LYS2      | GLN6  | 5.35  |
| ACE1         | TRP4  | 6.20  |           |       |       |
| GLY8         | VAL11 | 6.13  |           |       |       |
| MET10        | ASP13 | 6.07  |           |       |       |
| LYS6         | MET10 | 5.88  |           |       |       |
| ILE2         | LEU5  | 5.67  |           |       |       |
| GLY8         | ILE12 | 5.06  |           |       |       |

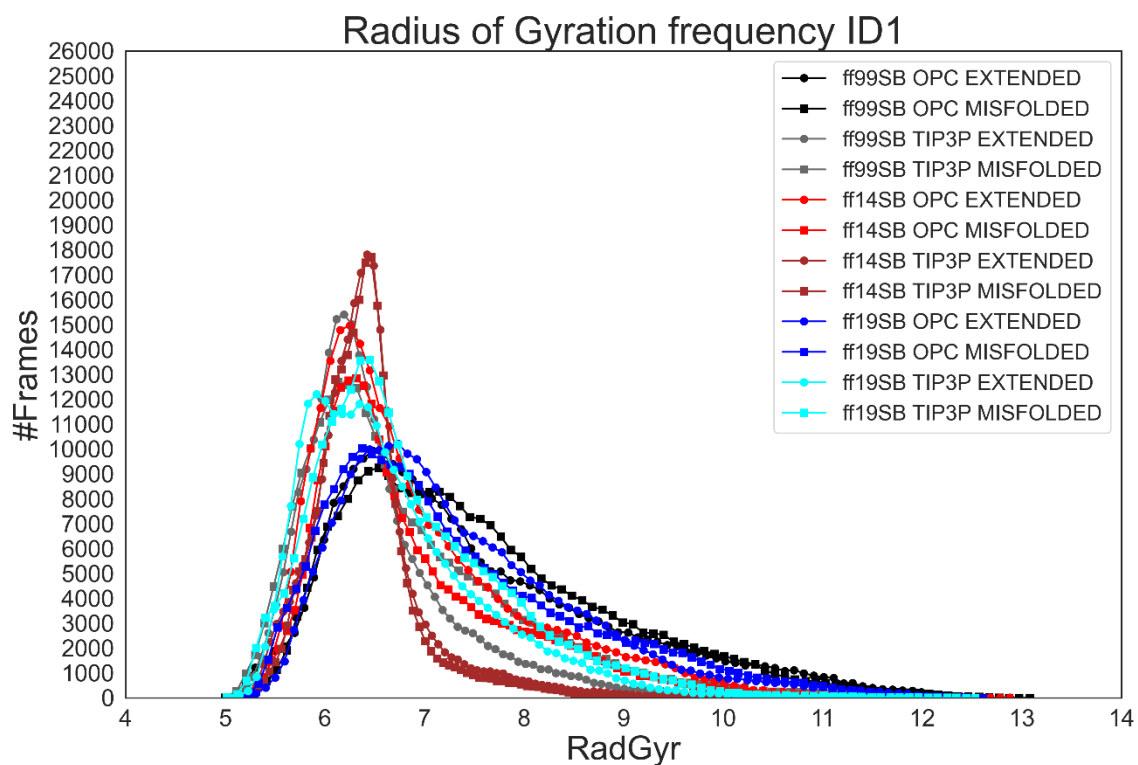

**Figure S94.** Radius of gyration frequencies calculated on the last 500ns of ID1 trajectories.

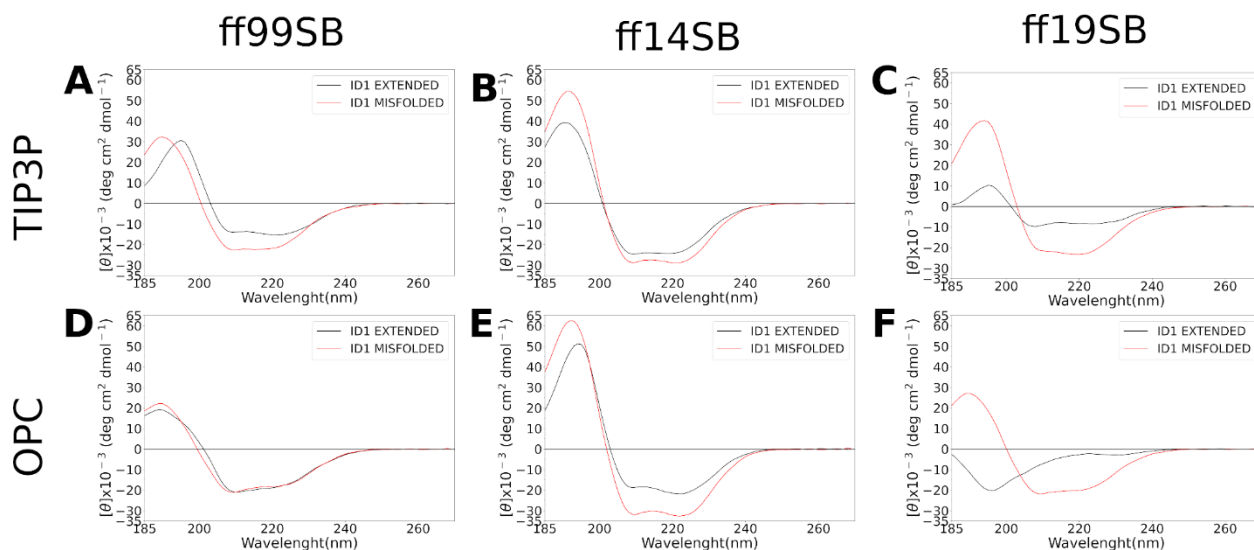

**Figure S95.** SESA CD spectra of ID1 calculated on the main cluster obtained from the last 500 ns of aMD trajectory. Results from extended and misfolded simulations are reported in black and red lines, respectively.

### ff99SB TIP3P

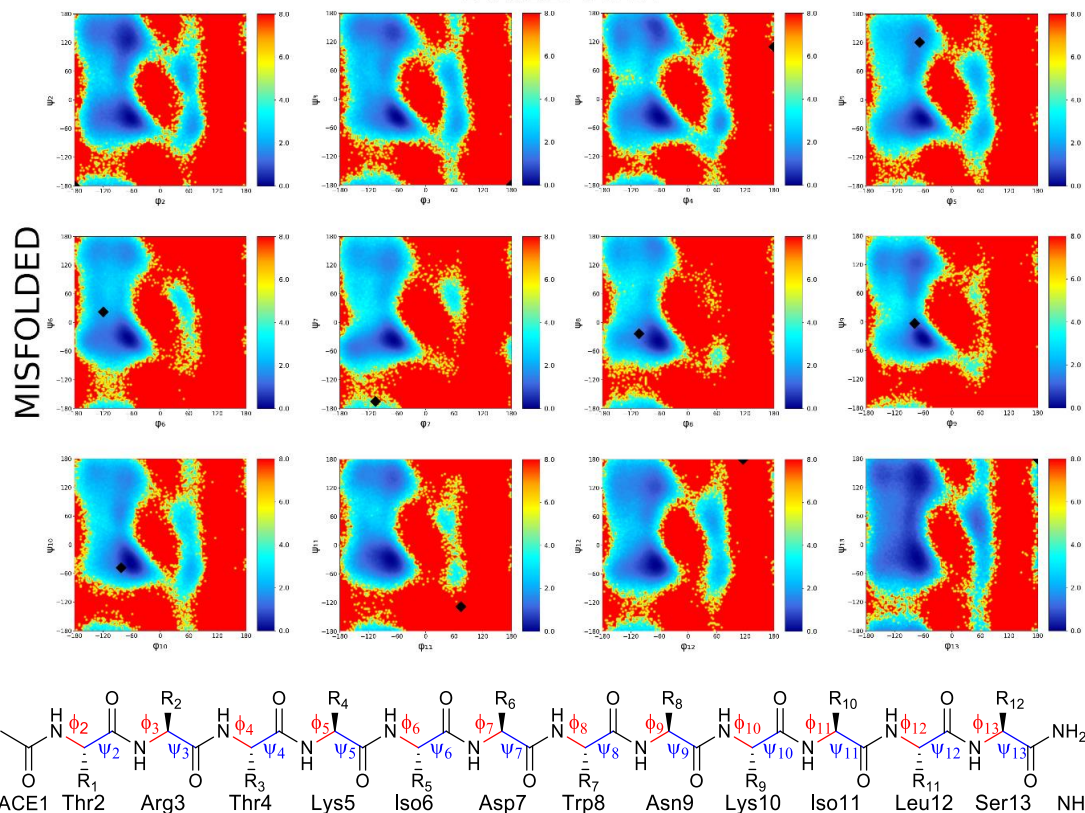

**Figure S96.** PMFs obtained from  $\phi$  and  $\psi$  dihedral distributions of ID2 residues for the ff99SB/TIP3P combination from extended (top panels) and misfolded (bottom panels) conformations. PMFs are shown as heat maps (0.0 – 8.0 kcal/mol range) from dark blue to red. The native conformation's  $\phi$  and  $\psi$  angles are reported as black diamonds. ID2 sequence and representation of  $\phi$  and  $\psi$  angles numbering are also shown.

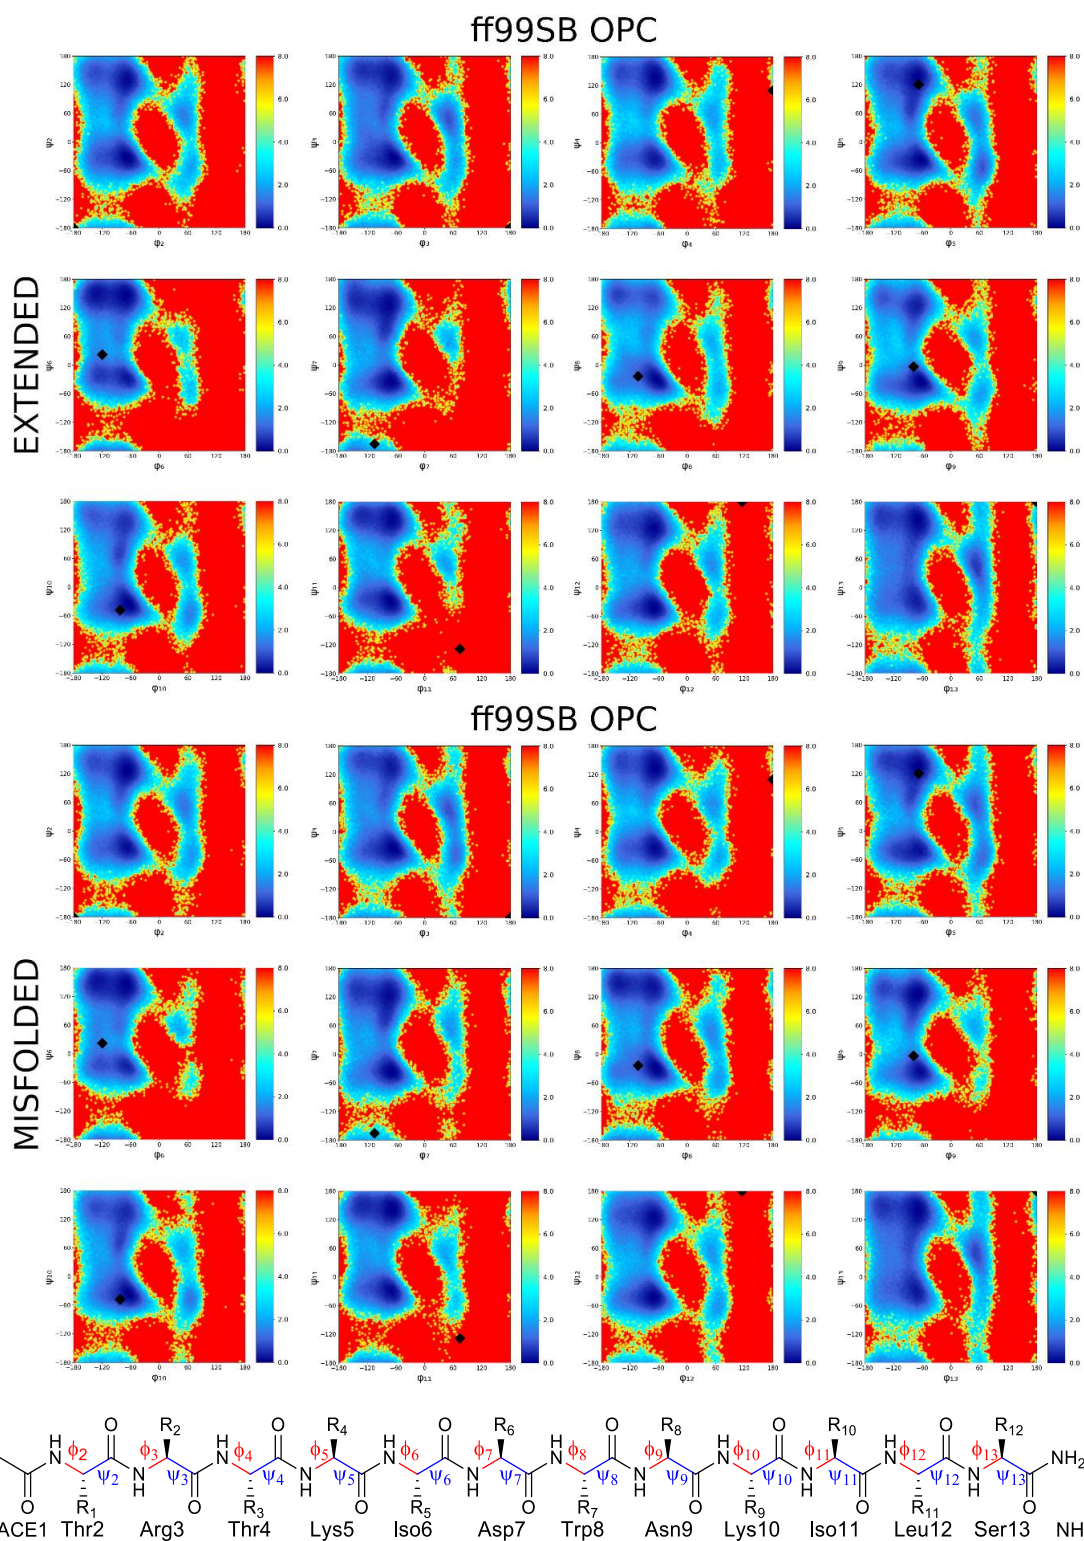

**Figure S97.** PMFs obtained from  $\phi$  and  $\psi$  dihedral distributions of ID2 residues for the ff99SB/OPC combination from extended (top panels) and misfolded (bottom panels) conformations. PMFs are shown as heat maps (0.0 – 8.0 kcal/mol range) from dark blue to red. The native conformation's  $\phi$  and  $\psi$  angles are reported as black diamonds. ID2 sequence and representation of  $\phi$  and  $\psi$  angles numbering are also shown.

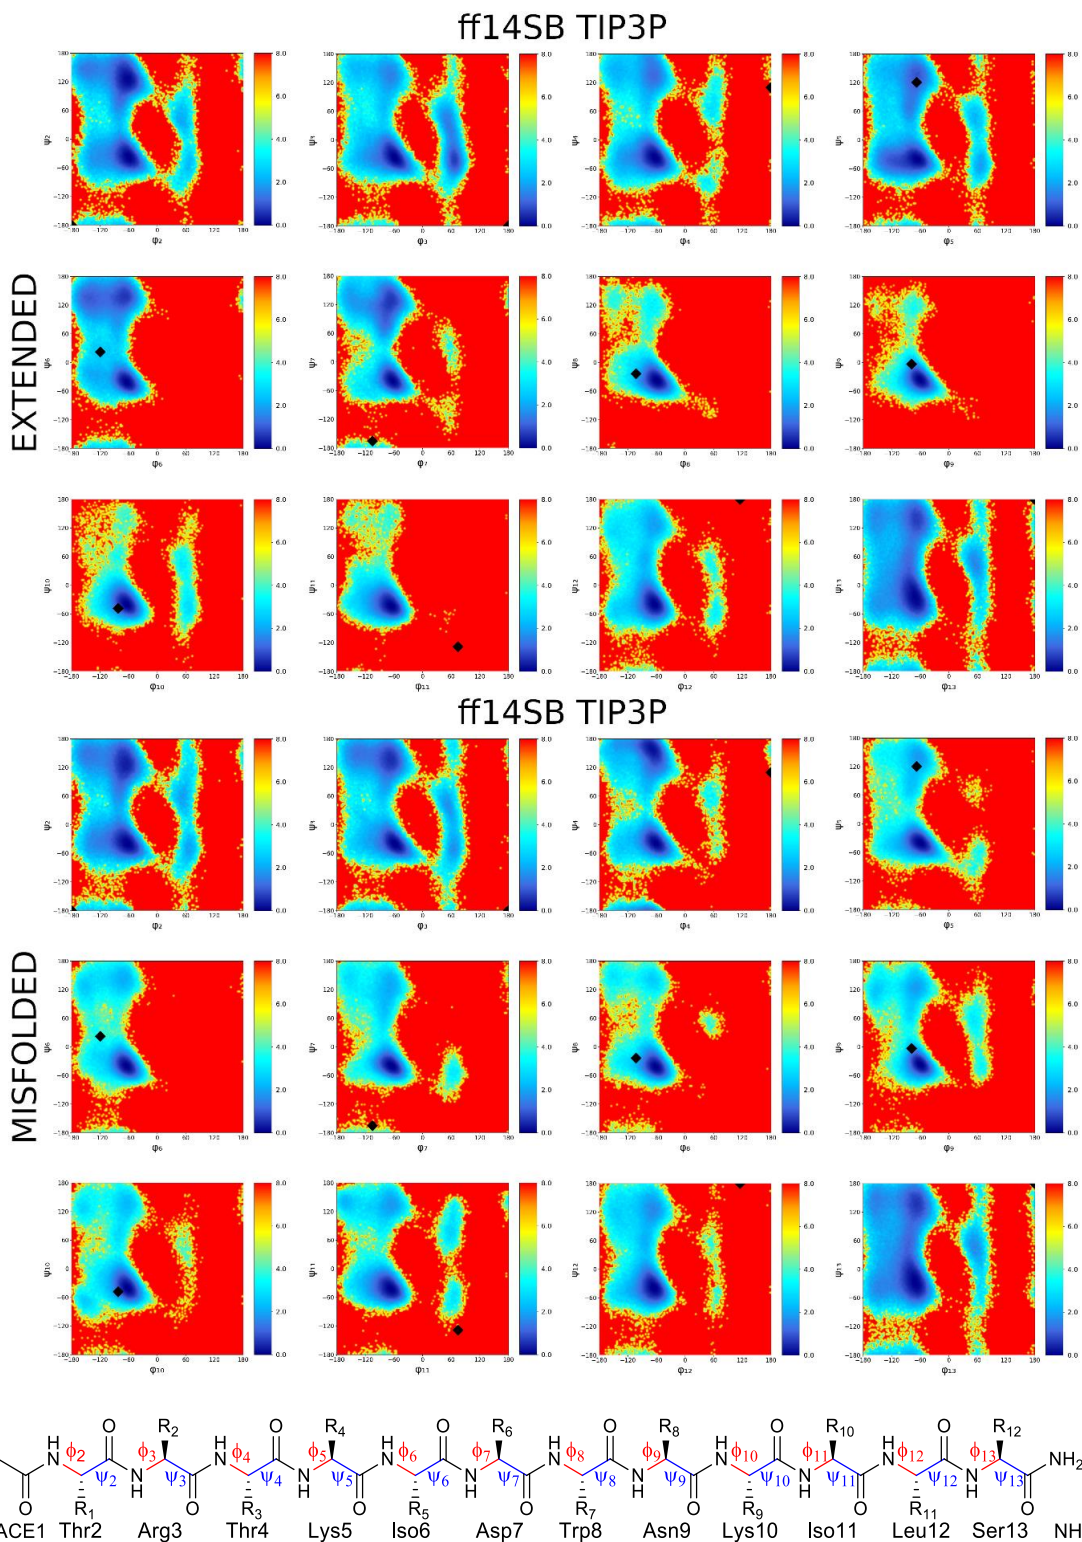

**Figure S98.** PMFs obtained from  $\phi$  and  $\psi$  dihedral distributions of ID2 residues for the ff14SB/TIP3P combination from extended (top panels) and misfolded (bottom panels) conformations. PMFs are shown as heat maps (0.0 – 8.0 kcal/mol range) from dark blue to red. The native conformation's  $\phi$  and  $\psi$  angles are reported as black diamonds. ID2 sequence and representation of  $\phi$  and  $\psi$  angles numbering are also shown.

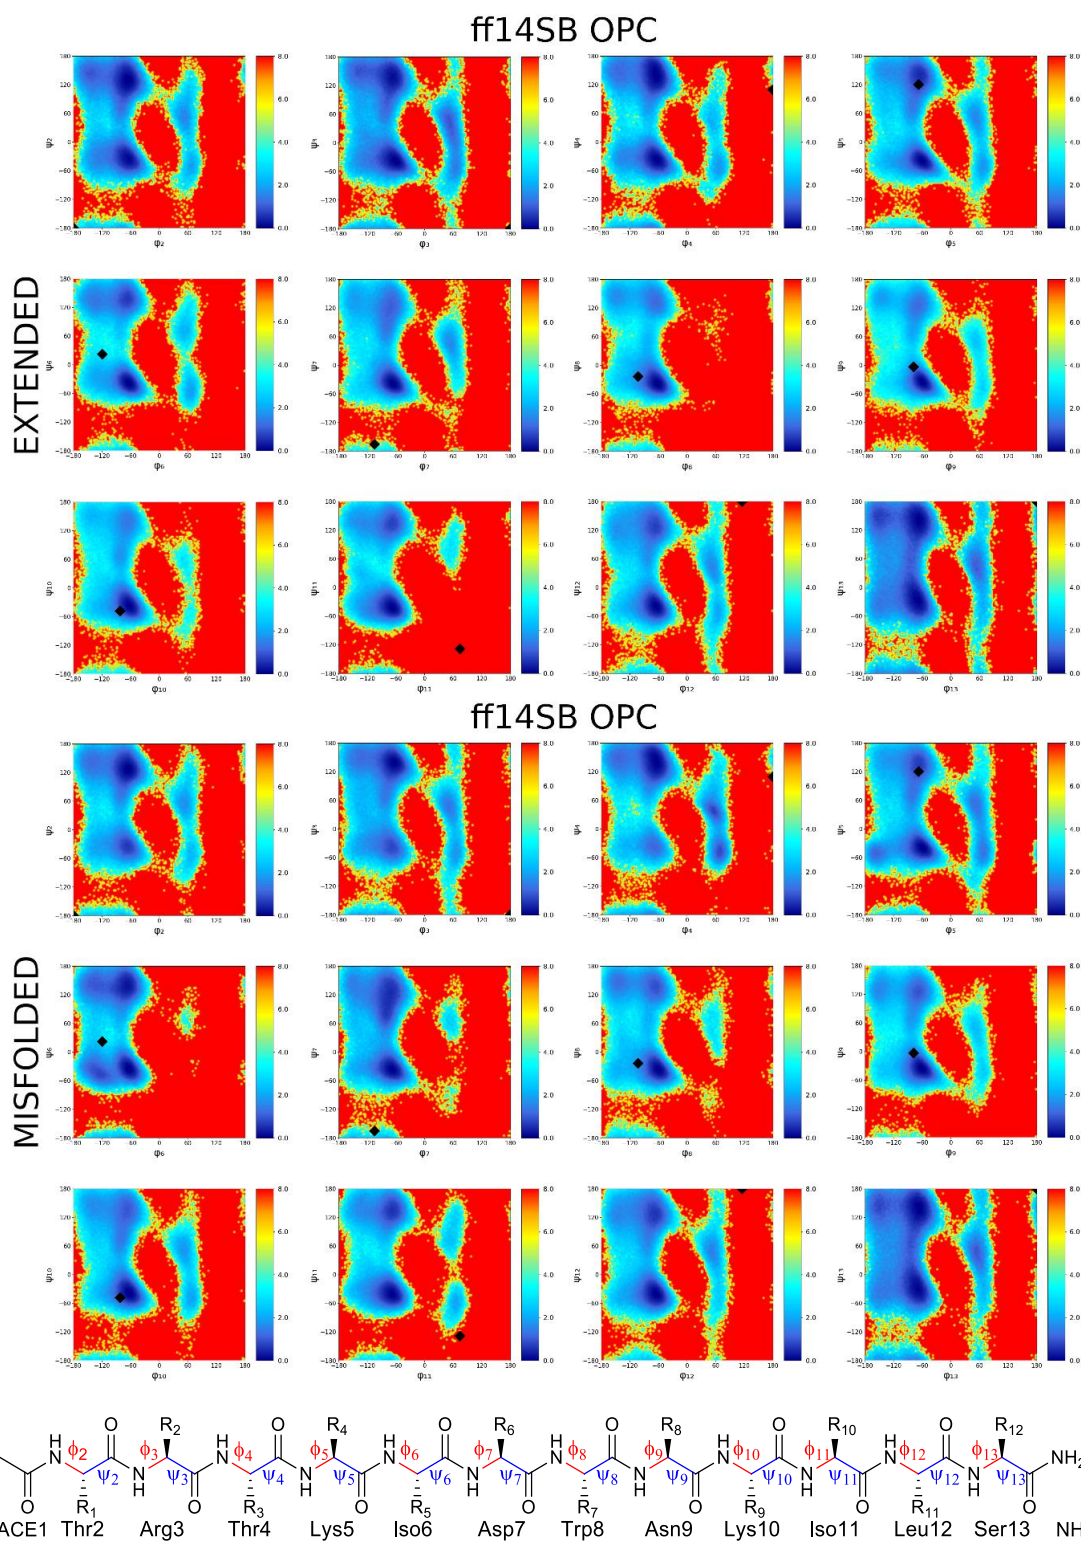

**Figure S99.** PMFs obtained from  $\phi$  and  $\psi$  dihedral distributions of ID2 residues for the ff14SB/OPC combination from extended (top panels) and misfolded (bottom panels) conformations. PMFs are shown as heat maps (0.0 – 8.0 kcal/mol range) from dark blue to red. The native conformation's  $\phi$  and  $\psi$  angles are reported as black diamonds. ID2 sequence and representation of  $\phi$  and  $\psi$  angles numbering are also shown.

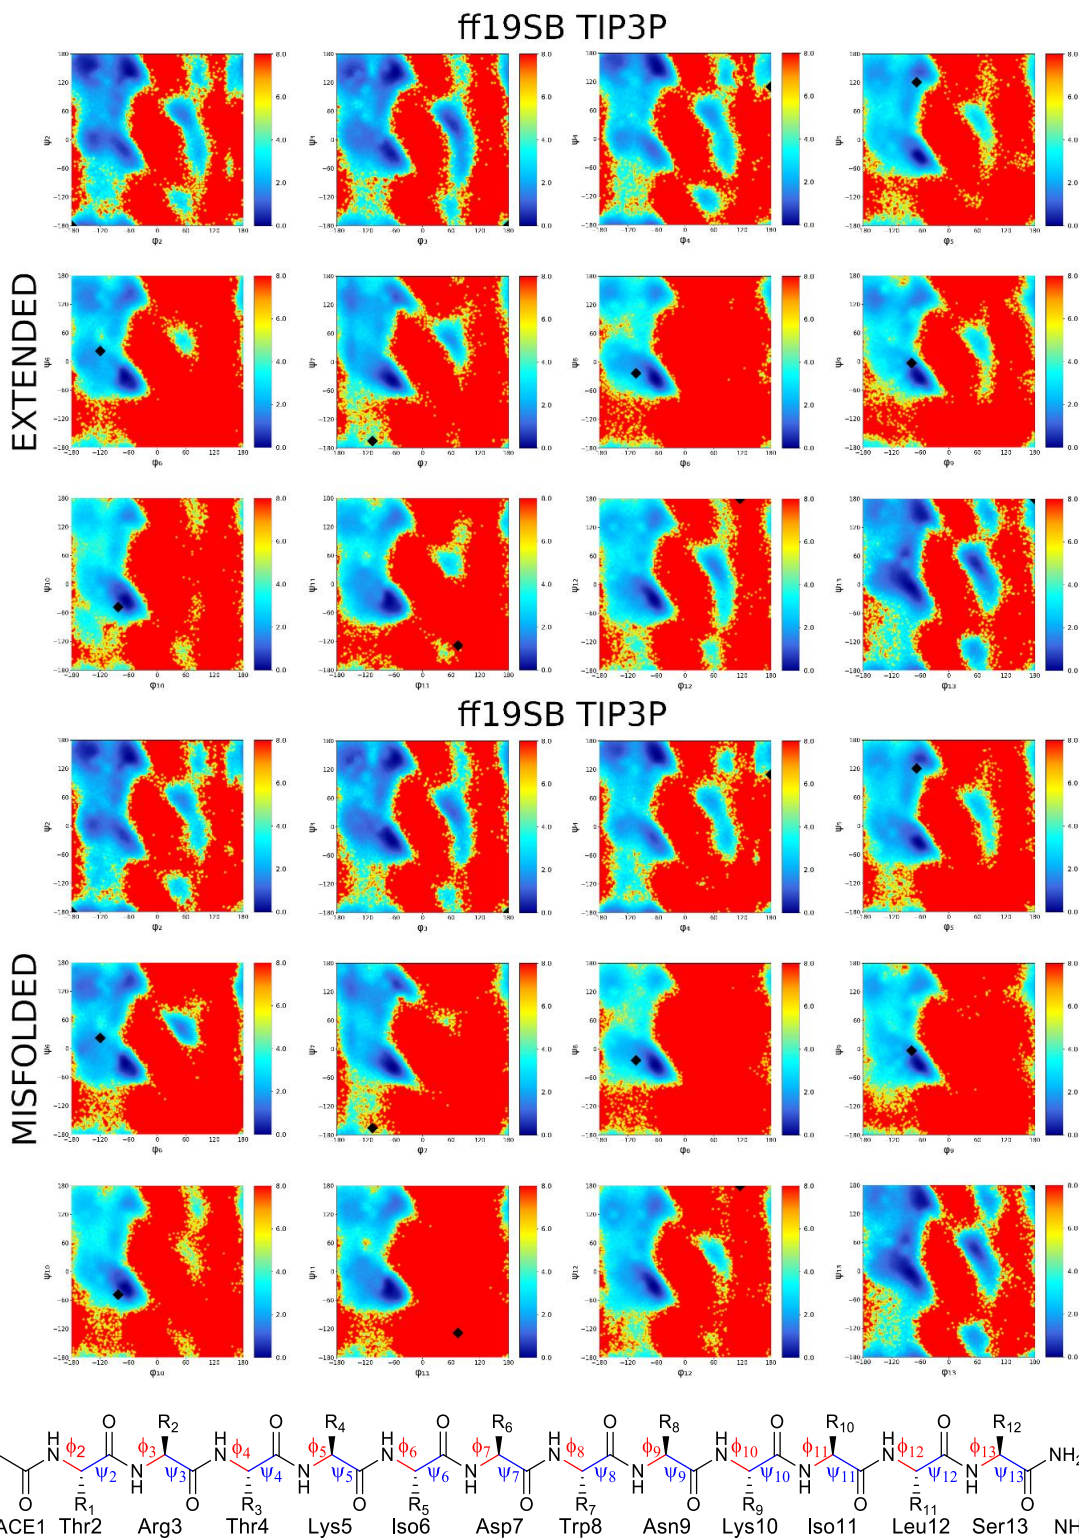

**Figure S100.** PMFs obtained from  $\phi$  and  $\psi$  dihedral distributions of ID2 residues for the ff19SB/TIP3P combination from extended (top panels) and misfolded (bottom panels) conformations. PMFs are shown as heat maps (0.0 – 8.0 kcal/mol range) from dark blue to red. The native conformation's  $\phi$  and  $\psi$  angles are reported as black diamonds. ID2 sequence and representation of  $\phi$  and  $\psi$  angles numbering are also shown.

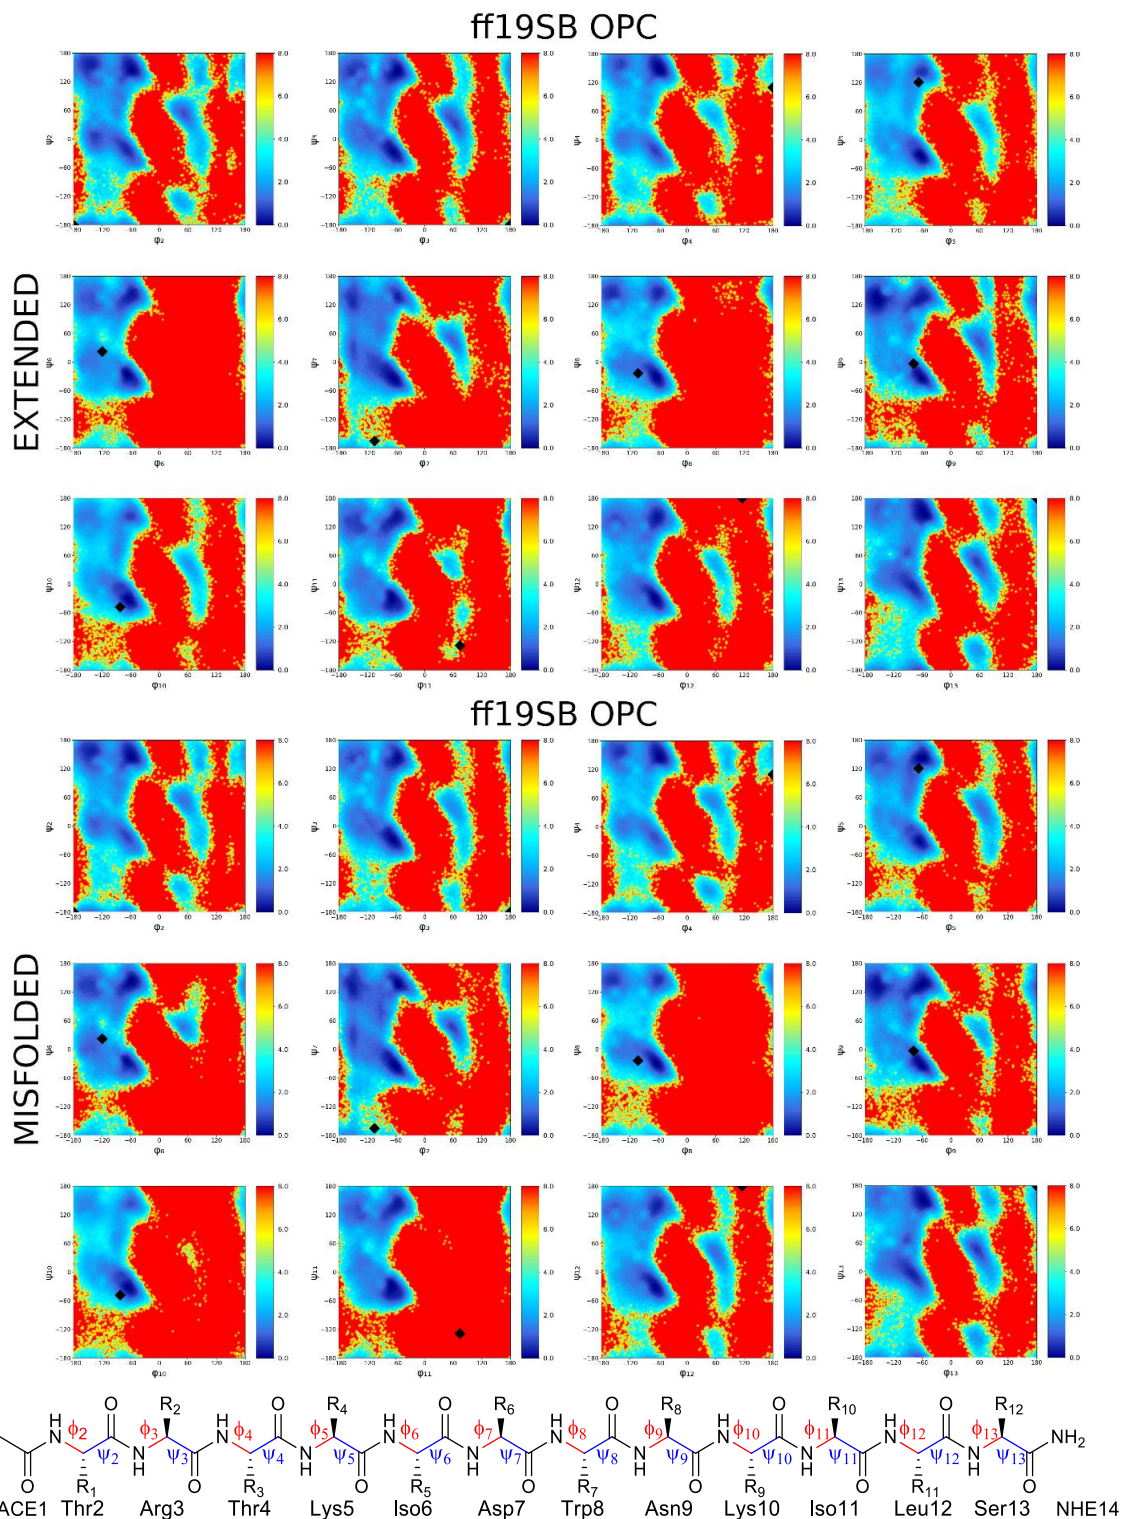

**Figure S101.** PMFs obtained from  $\phi$  and  $\psi$  dihedral distributions of ID2 residues for the ff19SB/OPC combination from extended (top panels) and misfolded (bottom panels) conformations. PMFs are shown as heat maps (0.0 – 8.0 kcal/mol range) from dark blue to red. The native conformation's  $\phi$  and  $\psi$  angles are reported as black diamonds. ID2 sequence and representation of  $\phi$  and  $\psi$  angles numbering are also shown.



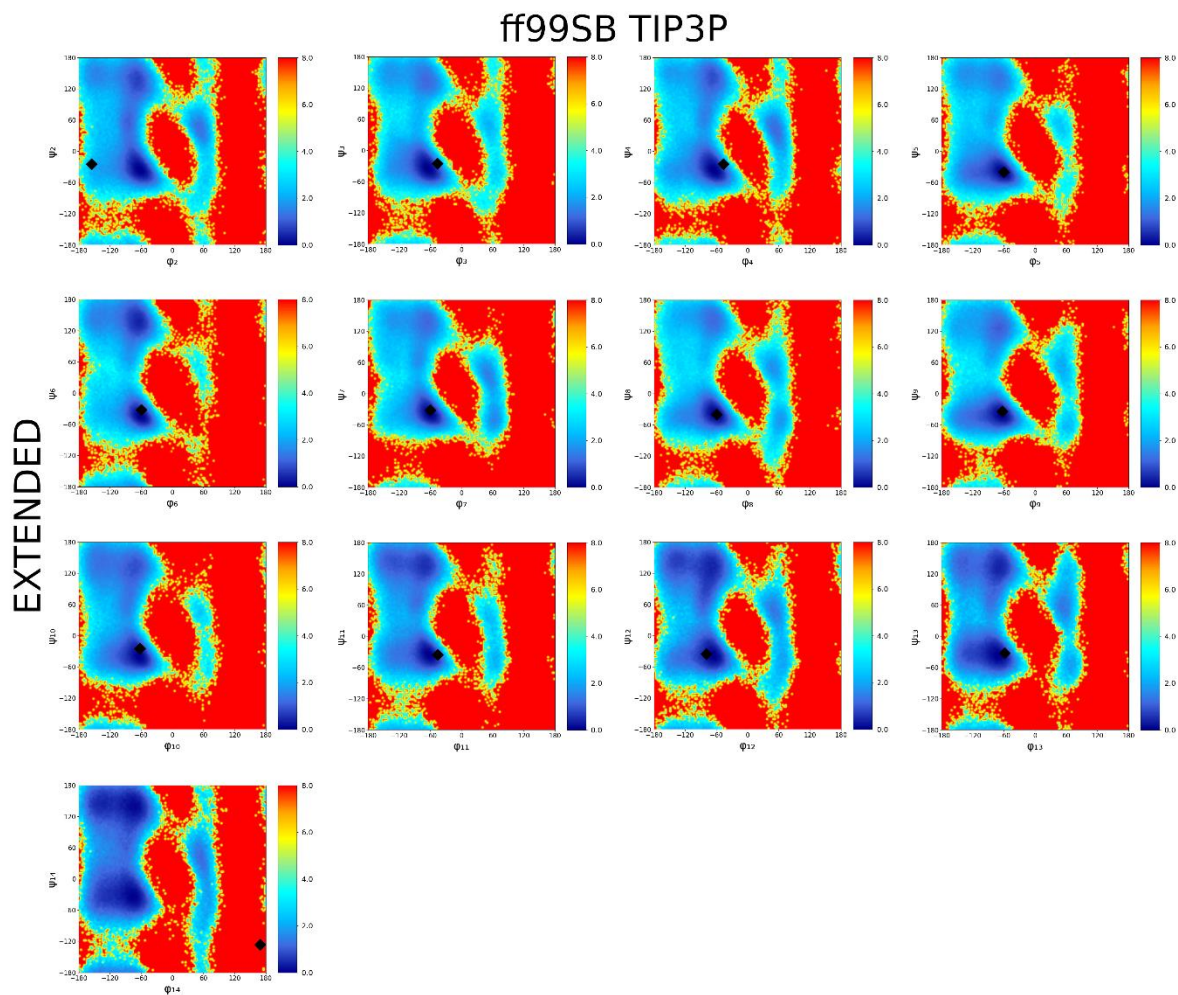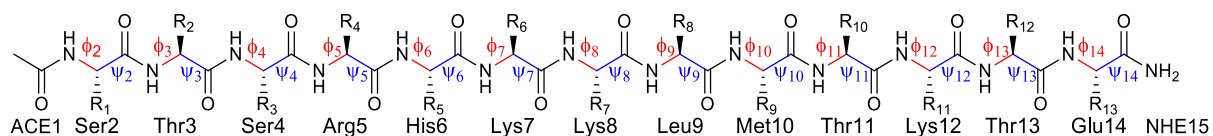

**Figure S102.** PMFs obtained from  $\phi$  and  $\psi$  dihedral distributions of ID3 residues for ff99SB/TIP3P combination from an extended conformation. PMFs are shown as heat maps (0.0 – 8.0 kcal/mol range) from dark blue to red. The native conformation's  $\phi$  and  $\psi$  angles are reported as black diamonds. ID3 sequence and representation of  $\phi$  and  $\psi$  angles numbering are also shown.

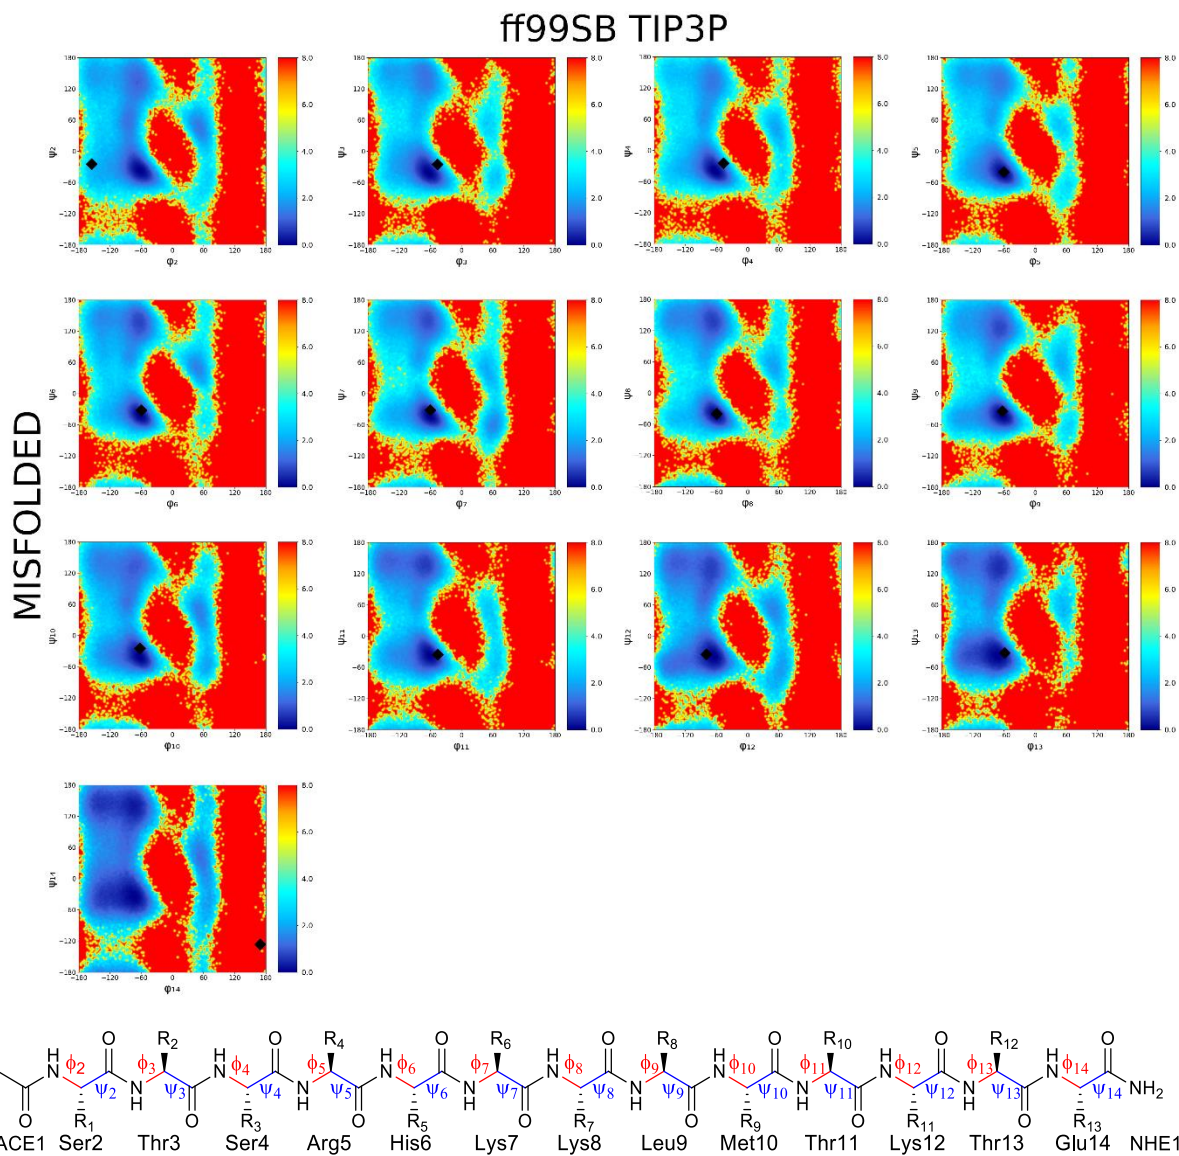

**Figure S103.** PMFs obtained from  $\phi$  and  $\psi$  dihedral distributions of ID3 residues for the ff99SB/TIP3P combination from a misfolded conformation. PMFs are shown as heat maps (0.0 – 8.0 kcal/mol range) from dark blue to red. The native conformation's  $\phi$  and  $\psi$  angles are reported as black diamonds. ID3 sequence and representation of  $\phi$  and  $\psi$  angles numbering are also shown.

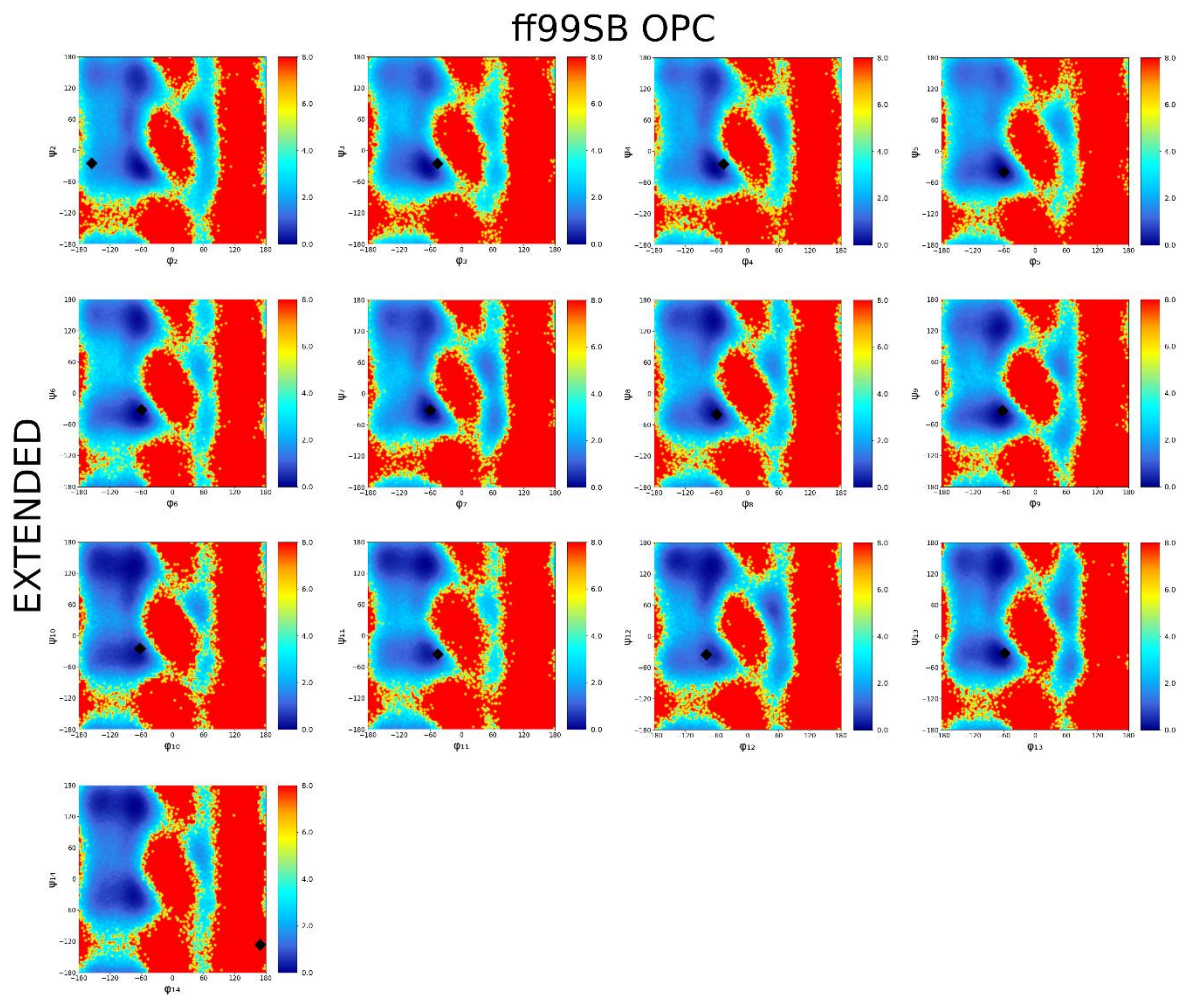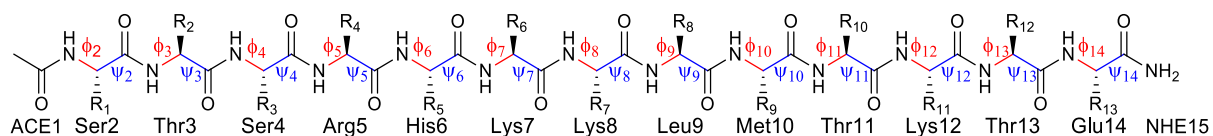

**Figure S104.** PMFs obtained from  $\phi$  and  $\psi$  dihedral distributions of ID3 residues for the ff99SB/OPC combination from an extended conformation. PMFs are shown as heat maps (0.0 – 8.0 kcal/mol range) from dark blue to red. The native conformation's  $\phi$  and  $\psi$  angles are reported as black diamonds. ID3 sequence and representation of  $\phi$  and  $\psi$  angles numbering are also shown.

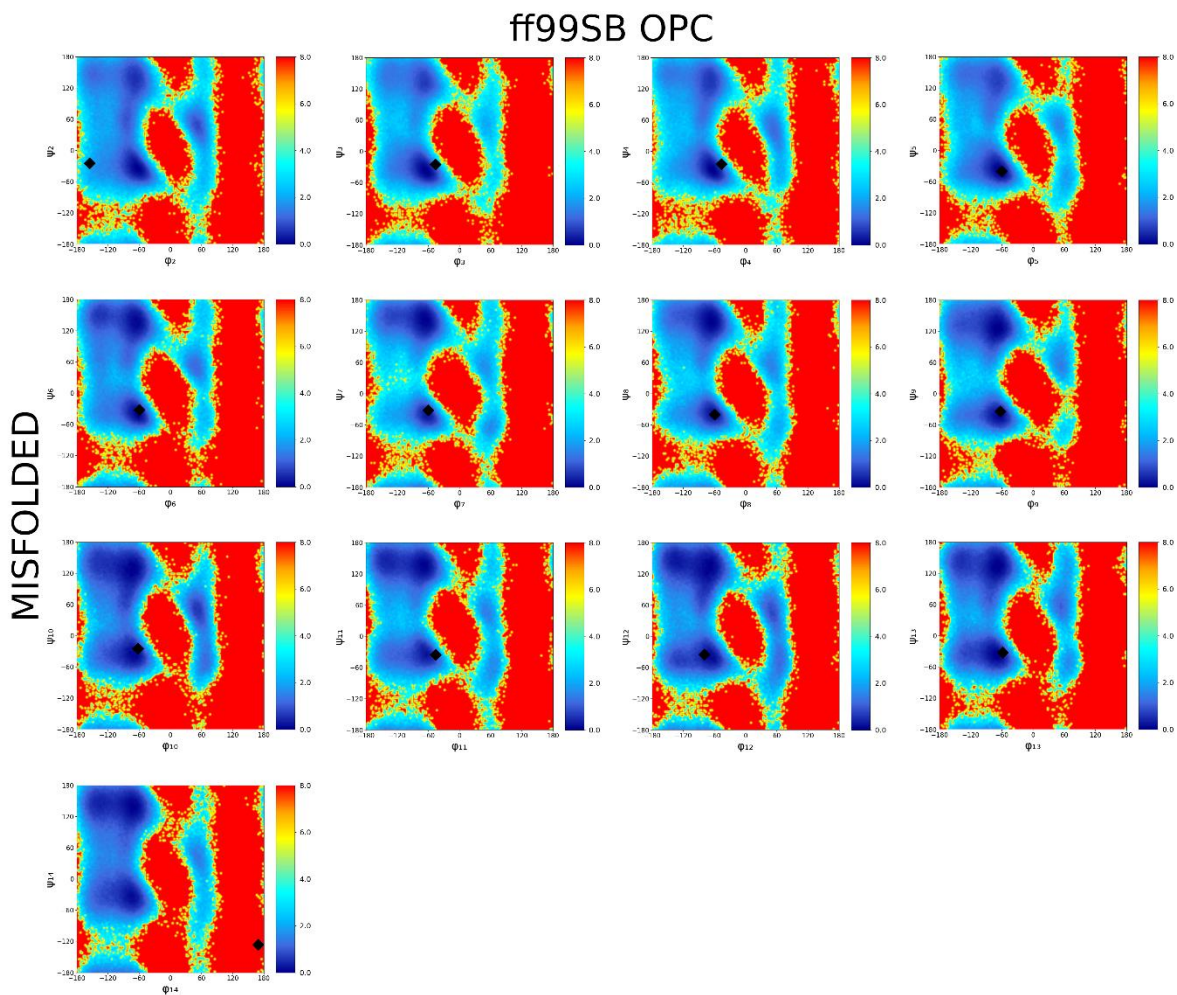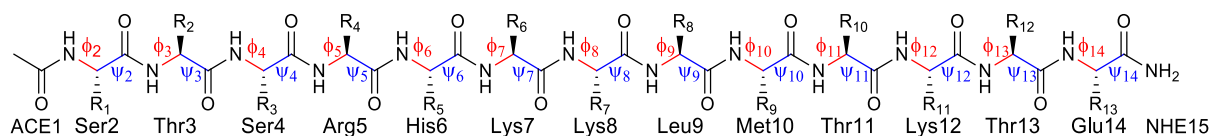

**Figure S105.** PMFs obtained from  $\phi$  and  $\psi$  dihedral distributions of ID3 residues for the ff99SB/OPC combination from a misfolded conformation. PMFs are shown as heat maps (0.0 – 8.0 kcal/mol range) from dark blue to red. The native conformation's  $\phi$  and  $\psi$  angles are reported as black diamonds. ID3 sequence and representation of  $\phi$  and  $\psi$  angles numbering are also shown.

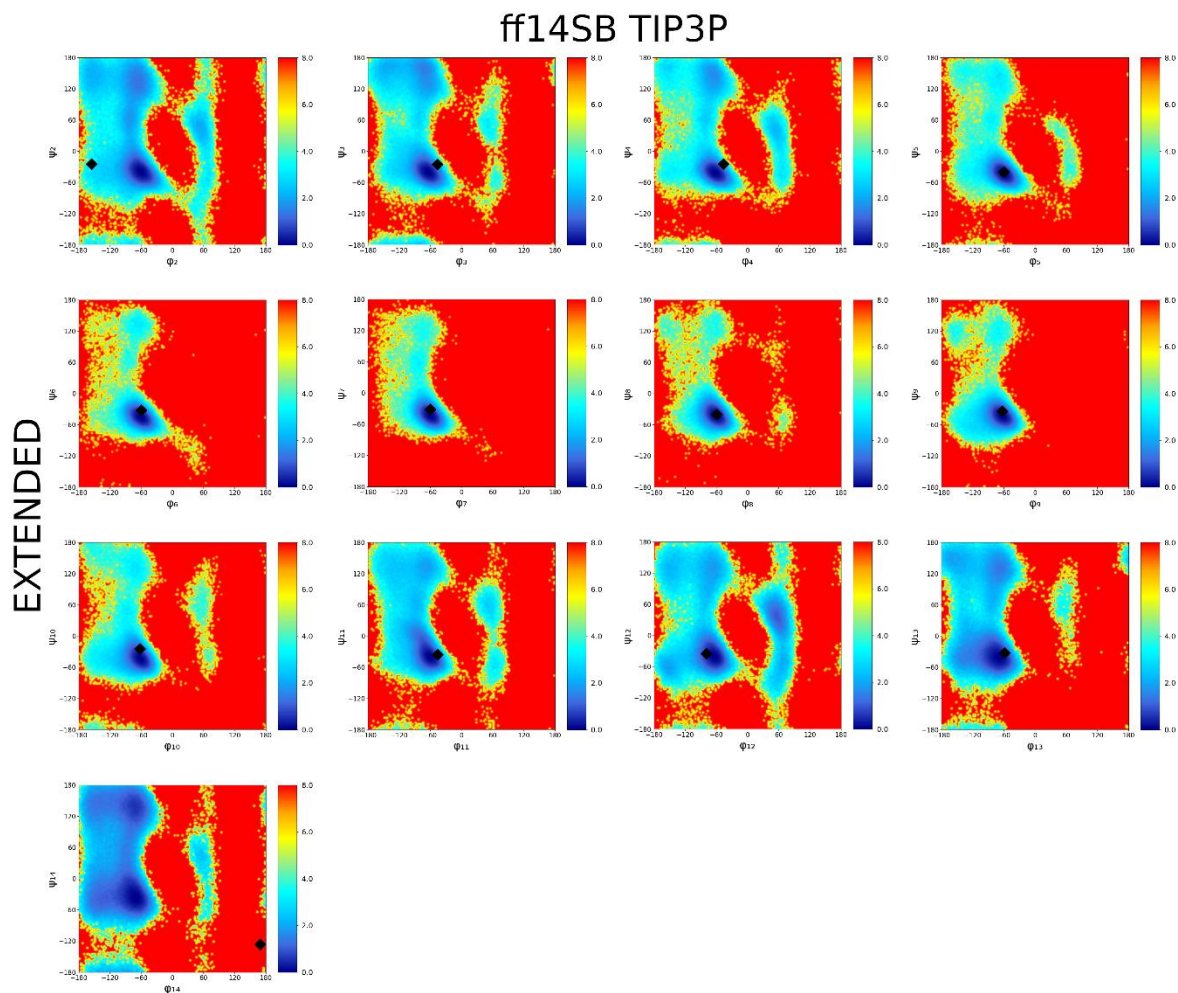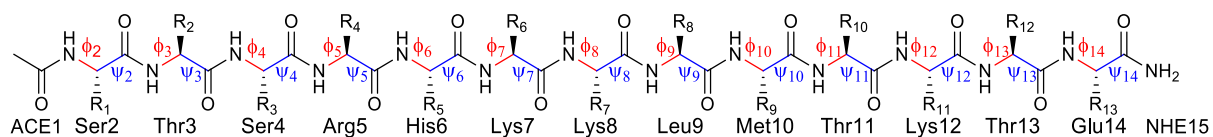

**Figure S106.** PMFs obtained from  $\phi$  and  $\psi$  dihedral distributions of ID3 residues for the ff14SB/TIP3P combination from an extended conformation. PMFs are shown as heat maps (0.0 – 8.0 kcal/mol range) from dark blue to red. The native conformation's  $\phi$  and  $\psi$  angles are reported as black diamonds. ID3 sequence and representation of  $\phi$  and  $\psi$  angles numbering are also shown.

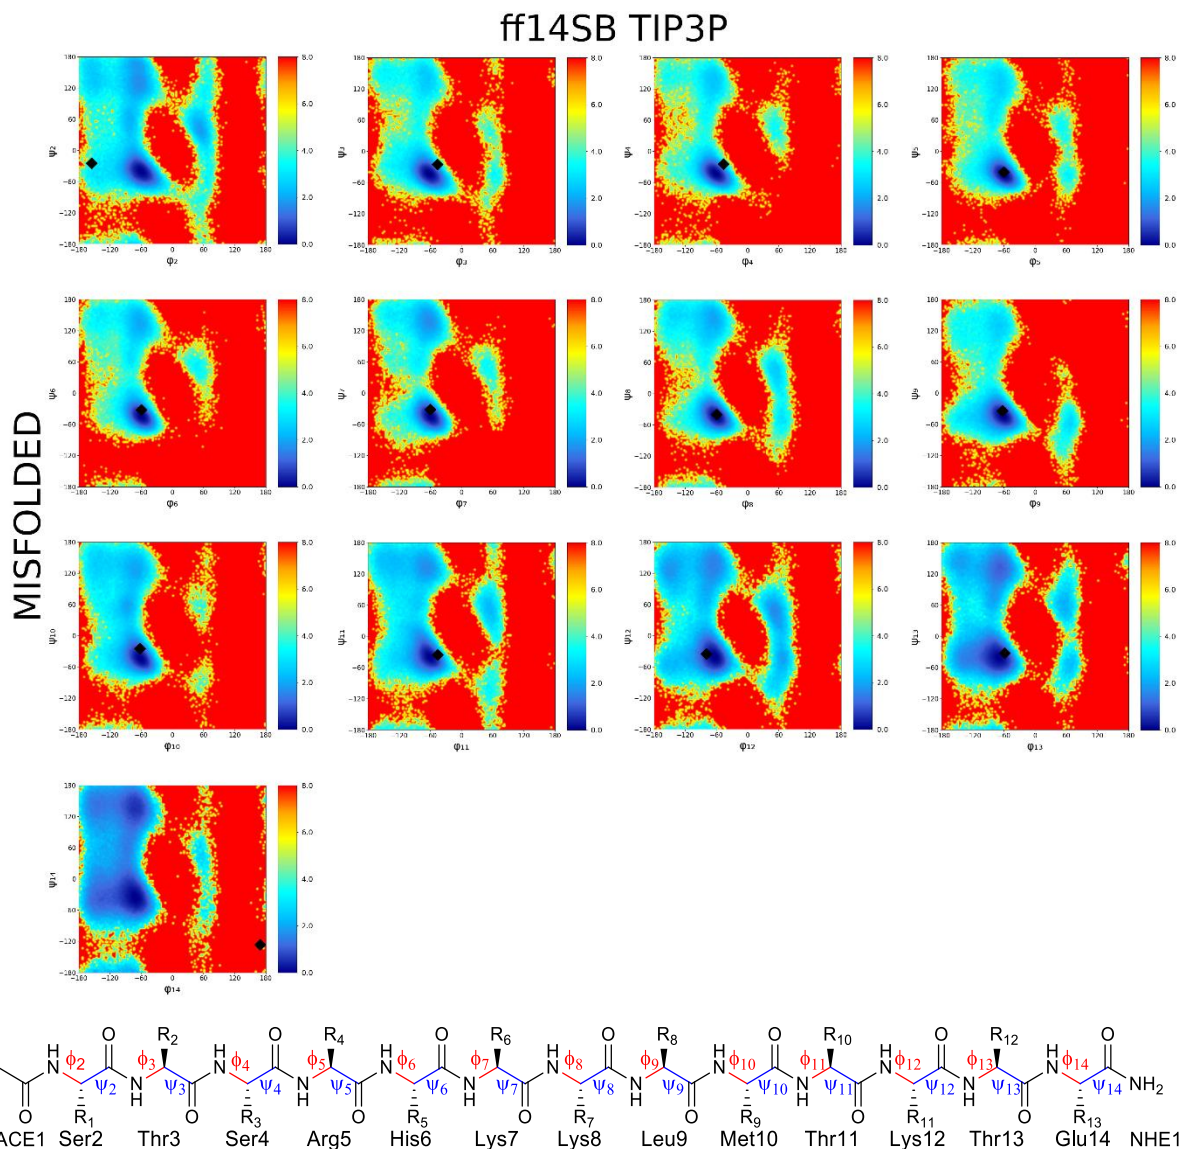

**Figure S107.** PMFs obtained from  $\phi$  and  $\psi$  dihedral distributions of ID3 residues for the ff14SB/TIP3P combination from a misfolded conformation. PMFs are shown as heat maps (0.0 – 8.0 kcal/mol range) from dark blue to red. The native conformation's  $\phi$  and  $\psi$  angles are reported as black diamonds. ID3 sequence and representation of  $\phi$  and  $\psi$  angles numbering are also shown.

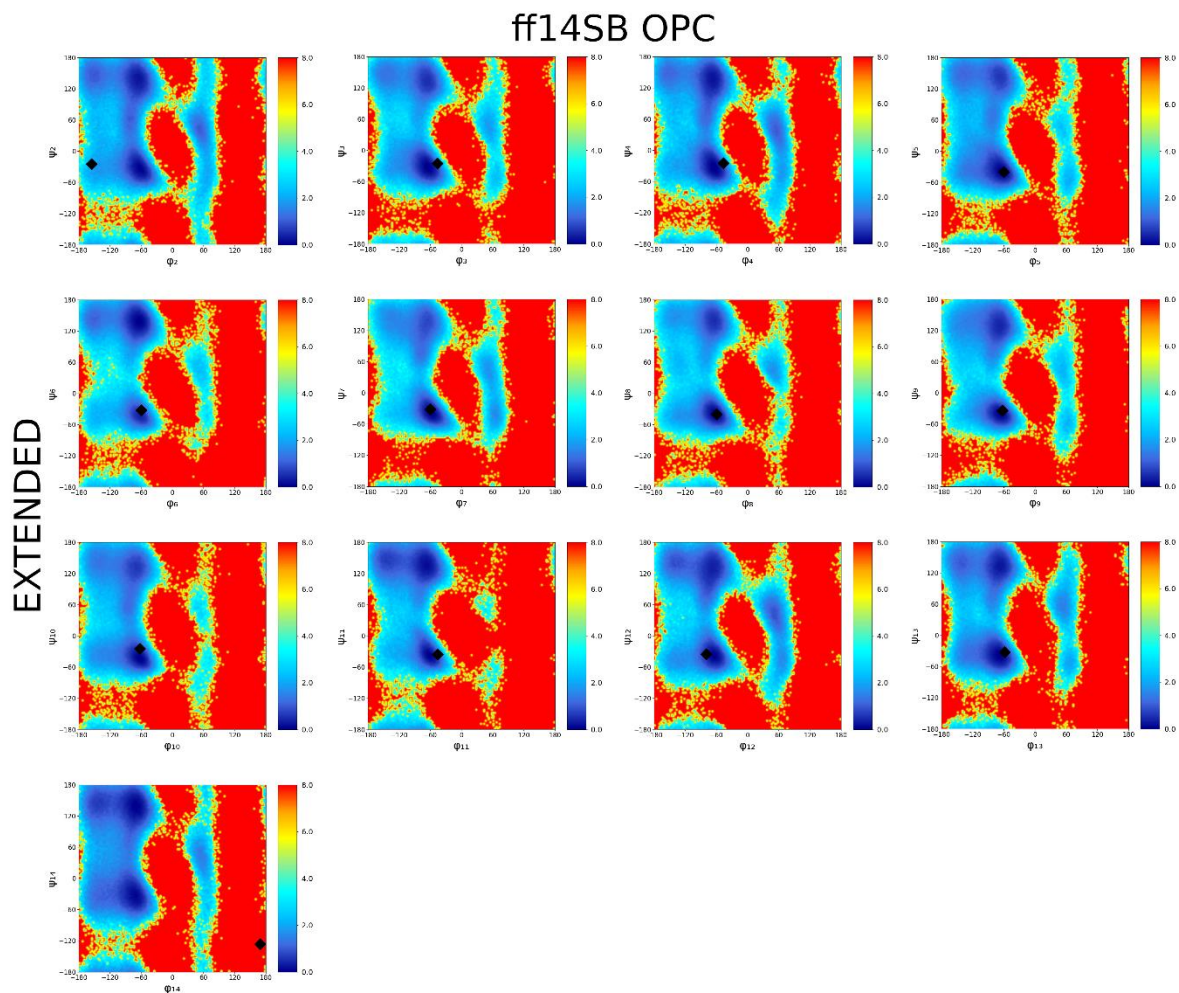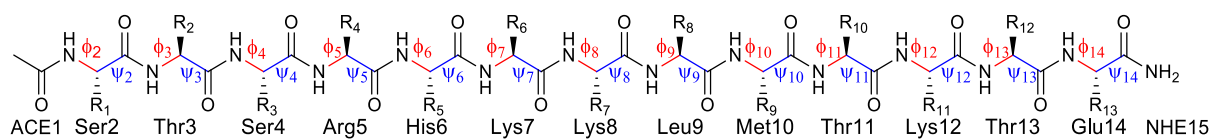

**Figure S108.** PMFs obtained from  $\phi$  and  $\psi$  dihedral distributions of ID3 residues for the ff14SB/OPC combination from an extended conformation. PMFs are shown as heat maps (0.0 – 8.0 kcal/mol range) from dark blue to red. The native conformation's  $\phi$  and  $\psi$  angles are reported as black diamonds. ID3 sequence and representation of  $\phi$  and  $\psi$  angles numbering are also shown.

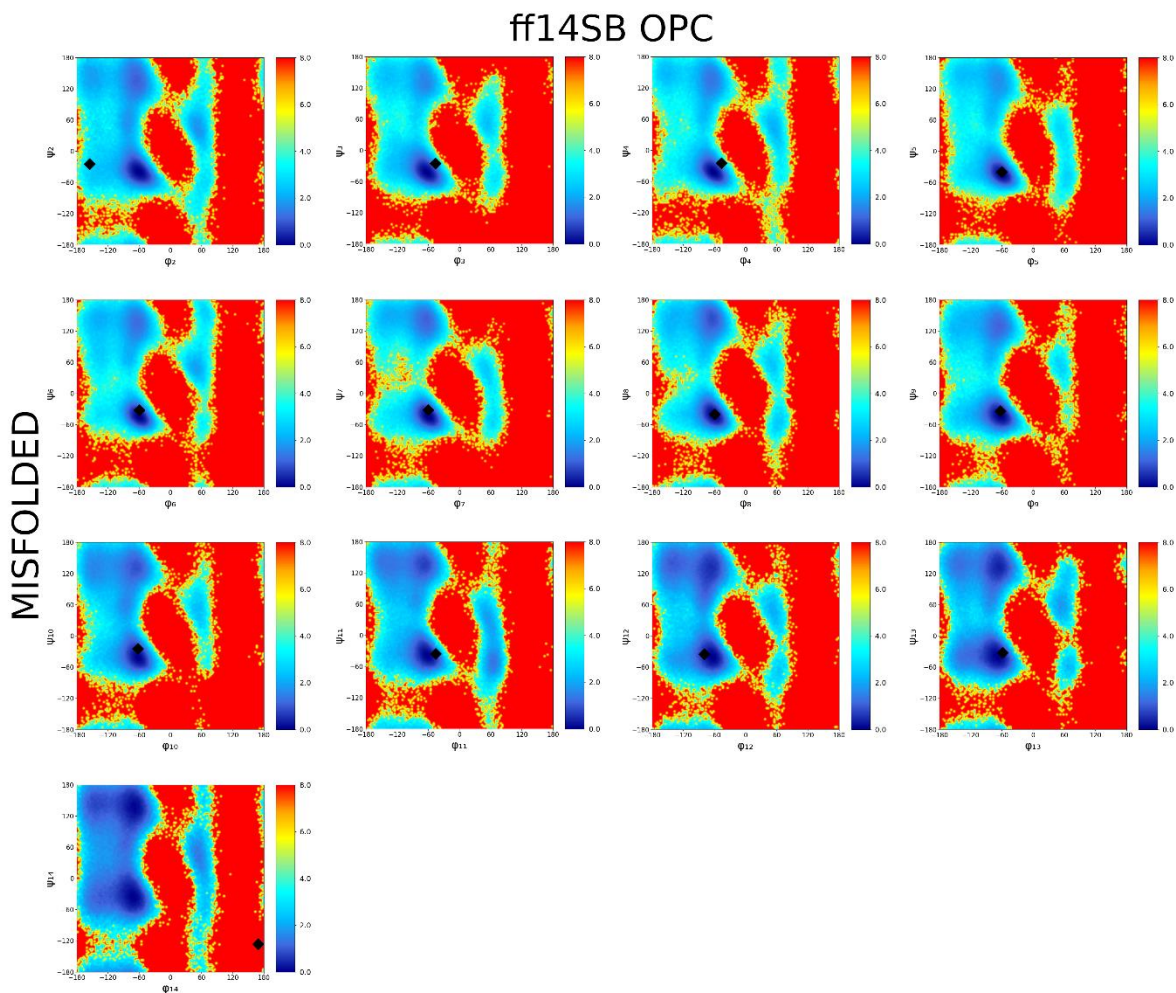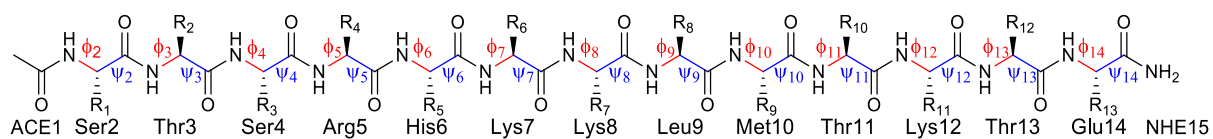

**Figure S109.** PMFs obtained from  $\phi$  and  $\psi$  dihedral distributions of ID3 residues for the ff14SB/OPC combination from a misfolded conformation. PMFs are shown as heat maps (0.0 – 8.0 kcal/mol range) from dark blue to red. The native conformation's  $\phi$  and  $\psi$  angles are reported as black diamonds. ID3 sequence and representation of  $\phi$  and  $\psi$  angles numbering are also shown.



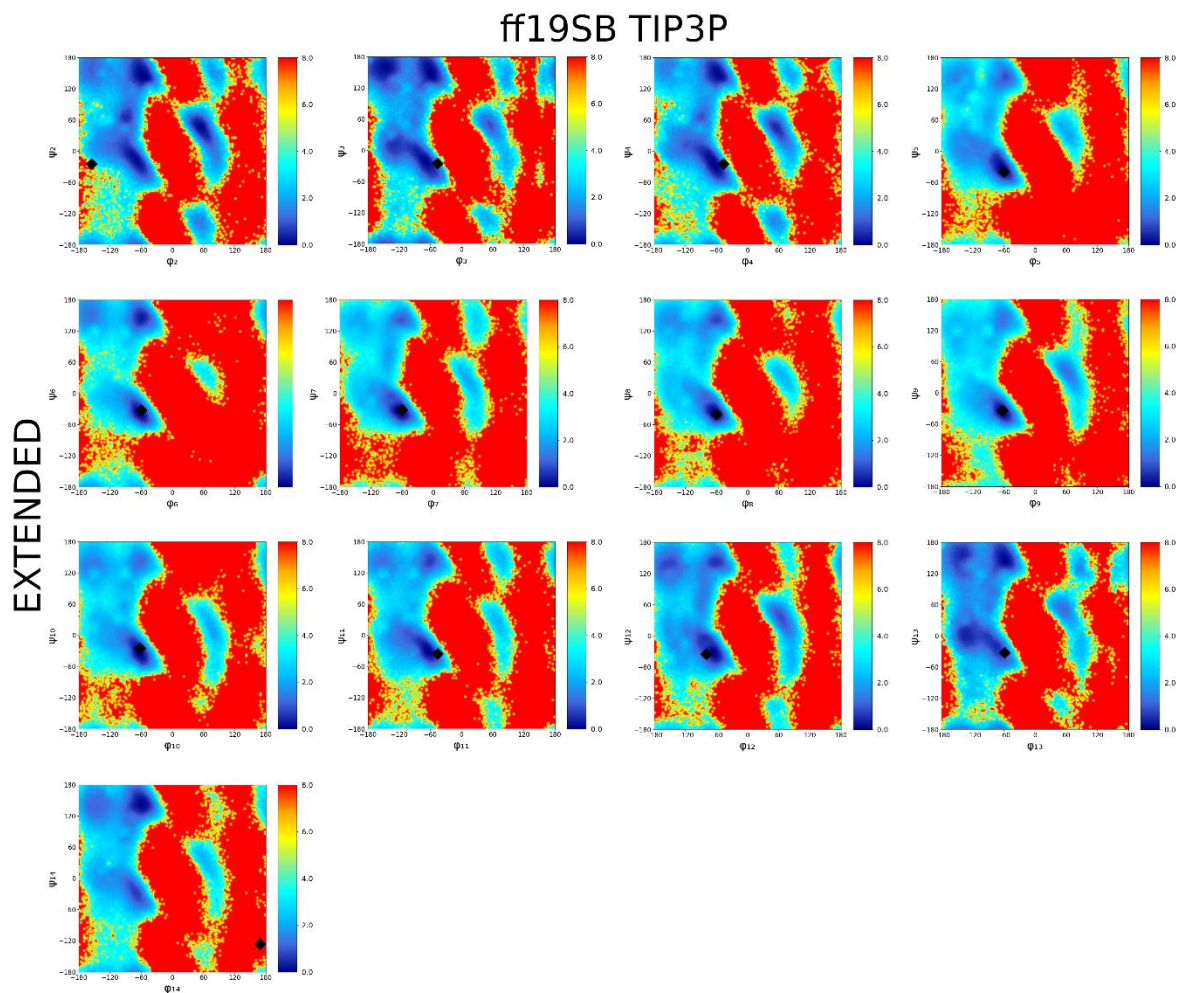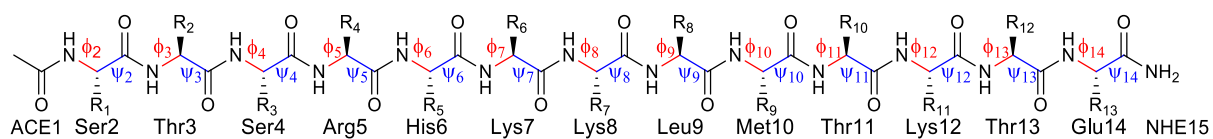

**Figure S110.** PMFs obtained from  $\phi$  and  $\psi$  dihedral distributions of ID3 residues for the ff19SB/TIP3P combination from an extended conformation. PMFs are shown as heat maps (0.0 – 8.0 kcal/mol range) from dark blue to red. The native conformation's  $\phi$  and  $\psi$  angles are reported as black diamonds. ID3 sequence and representation of  $\phi$  and  $\psi$  angles numbering are also shown.

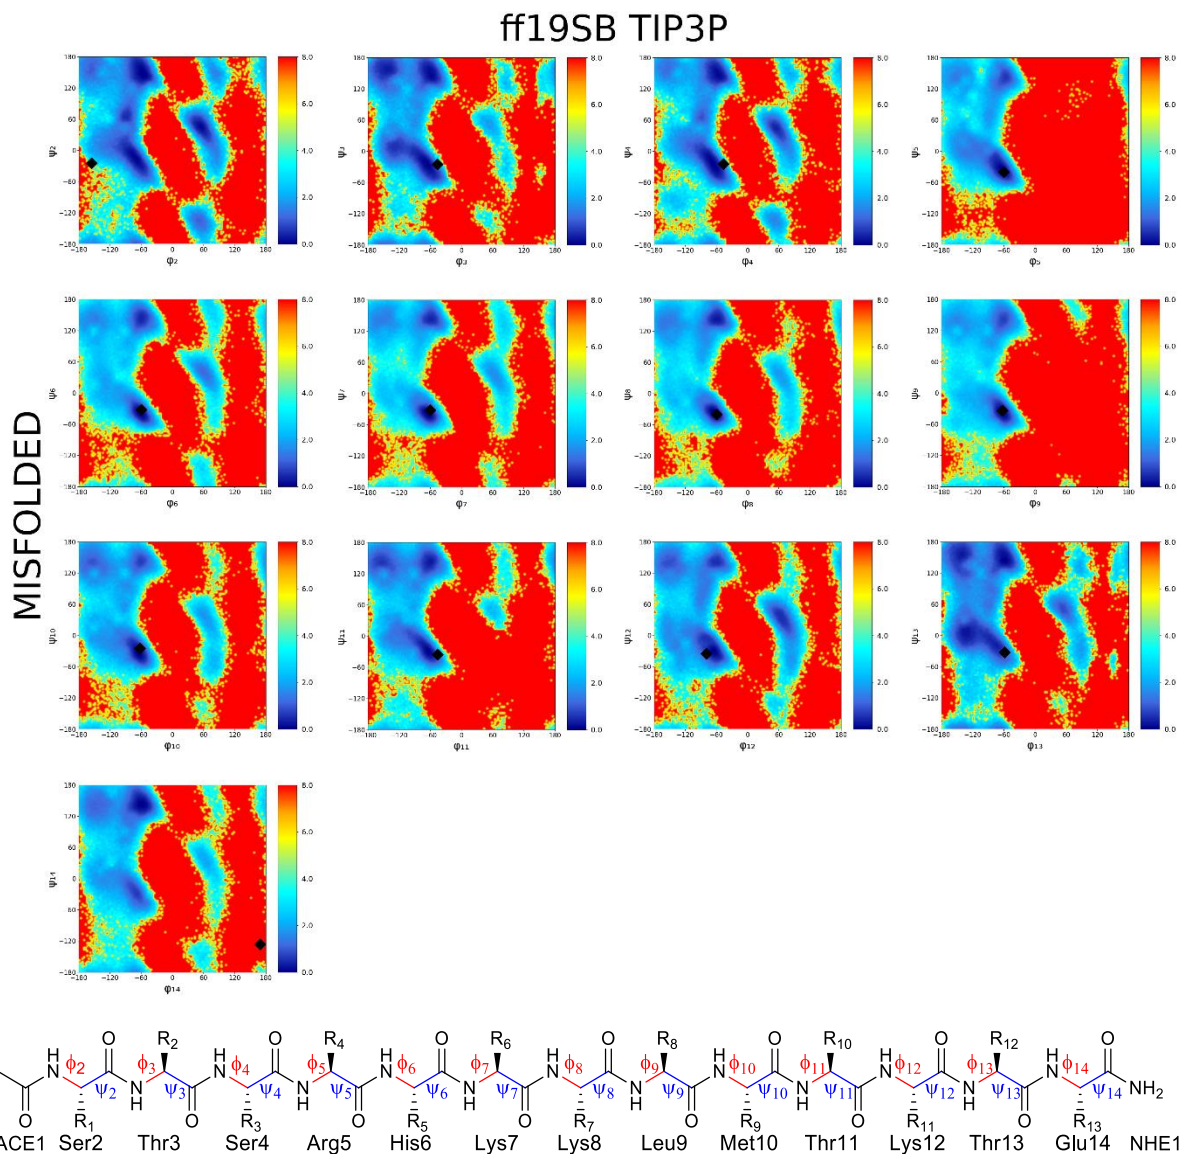

**Figure S111.** PMFs obtained from  $\phi$  and  $\psi$  dihedral distributions of ID3 residues for the ff19SB/TIP3P combination from a misfolded conformation. PMFs are shown as heat maps (0.0 – 8.0 kcal/mol range) from dark blue to red. The native conformation's  $\phi$  and  $\psi$  angles are reported as black diamonds. ID3 sequence and representation of  $\phi$  and  $\psi$  angles numbering are also shown.

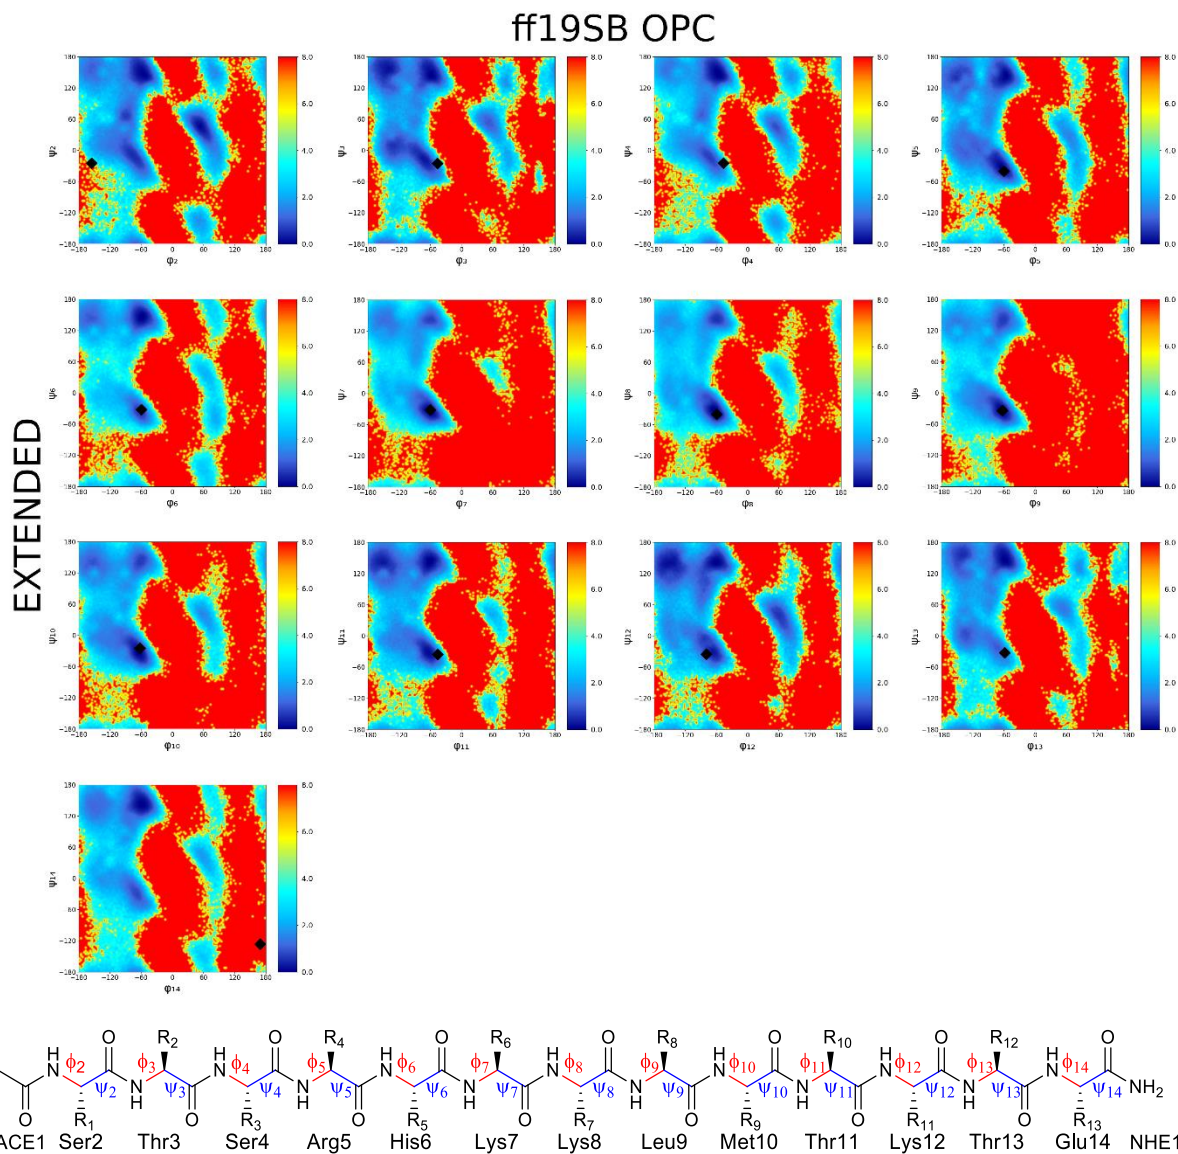

**Figure S112.** PMFs obtained from  $\phi$  and  $\psi$  dihedral distributions of ID3 residues for the ff19SB/OPC combination from an extended conformation. PMFs are shown as heat maps (0.0 – 8.0 kcal/mol range) from dark blue to red. The native conformation's  $\phi$  and  $\psi$  angles are reported as black diamonds. ID3 sequence and representation of  $\phi$  and  $\psi$  angles numbering are also shown.

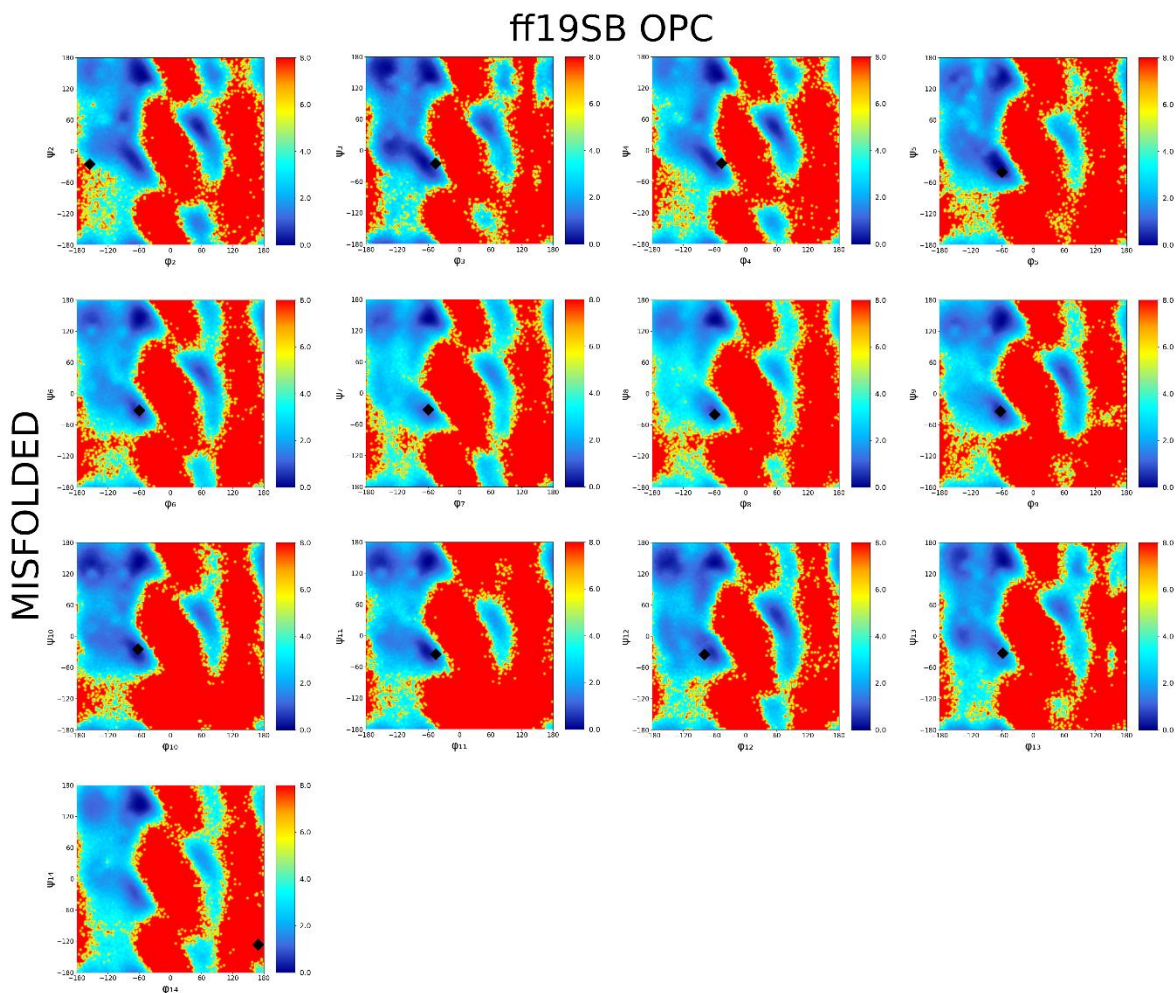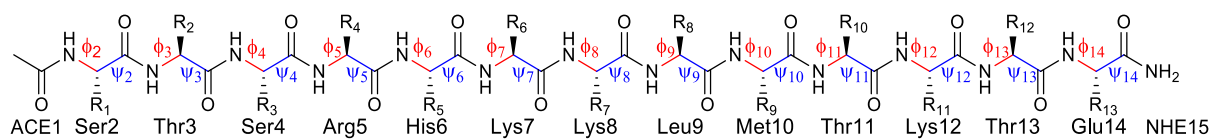

**Figure S113.** PMFs obtained from  $\phi$  and  $\psi$  dihedral distributions of ID3 residues for the ff19SB/OPC combination from a misfolded conformation. PMFs are shown as heat maps (0.0 – 8.0 kcal/mol range) from dark blue to red. The native conformation's  $\phi$  and  $\psi$  angles are reported as black diamonds. ID3 sequence and representation of  $\phi$  and  $\psi$  angles numbering are also shown.

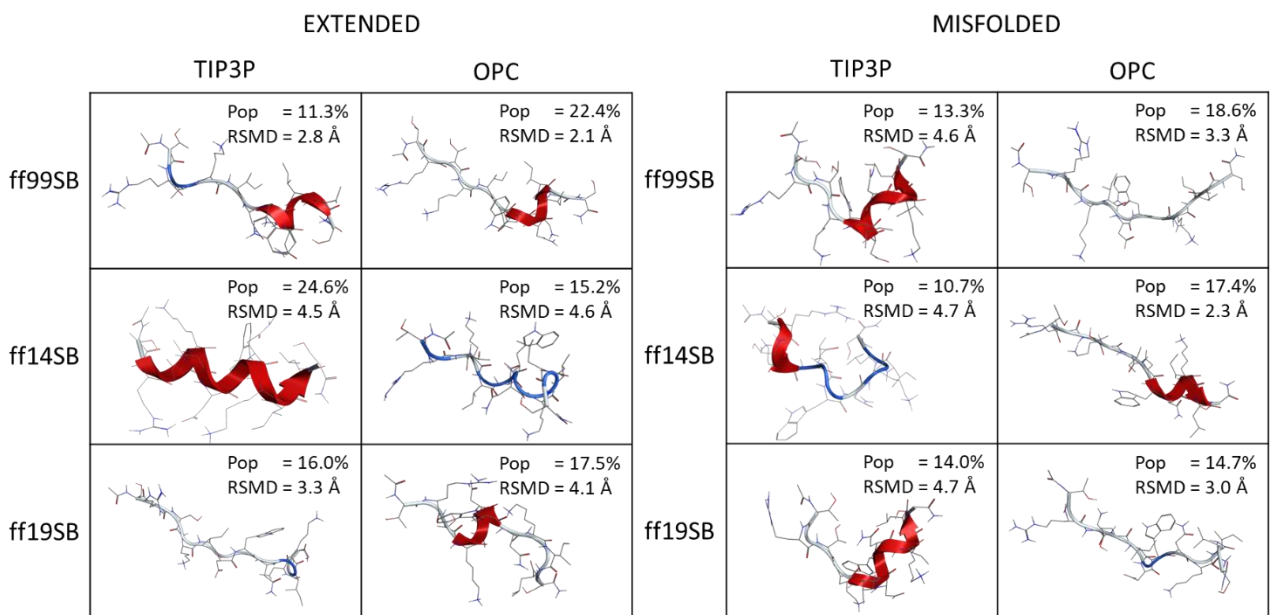

**Figure S114.** Representative conformation and population (pop%) of the second clusters from ID2 trajectories. RMSDs vs native structure are also shown.

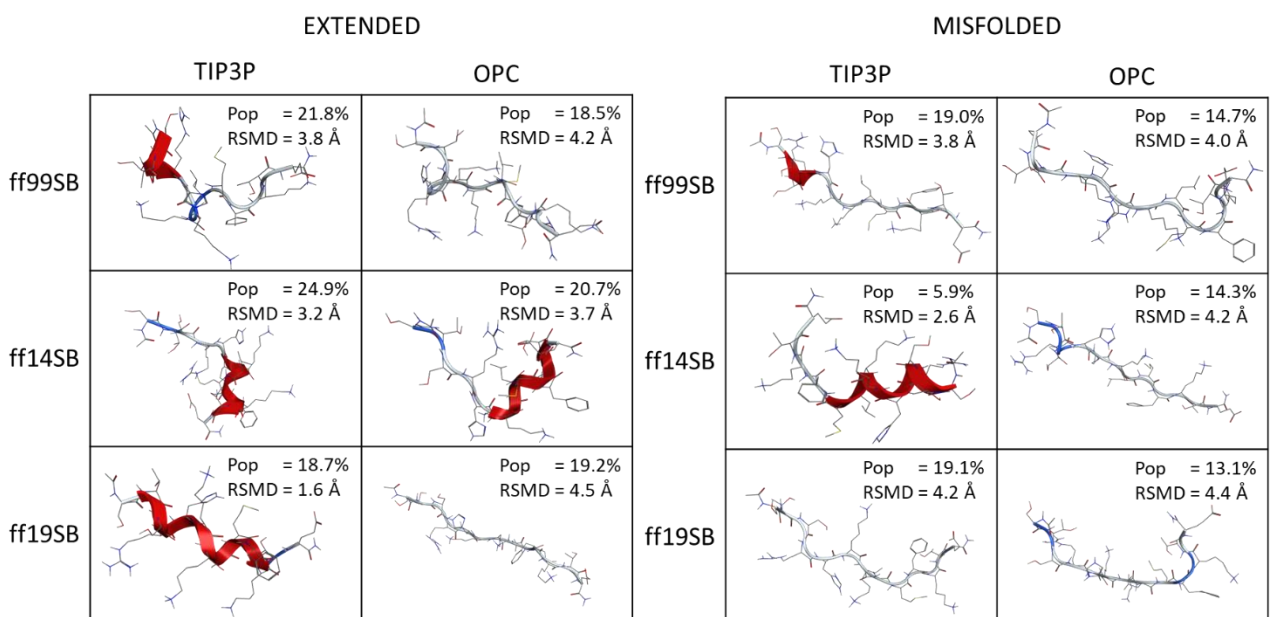

**Figure S115.** Representative conformation and population (pop%) of the second clusters from ID3 trajectories. RMSDs vs native structure are also shown.

**Table S10.** H-bond analyses from ID2 trajectories. Only H-bonds involving the backbone are included in the table (donor N-H, acceptor C=O). Native H-bonds are highlighted in bold.

| NATIVE      |              |       |              |              |       |              |              |       |             |              |       |
|-------------|--------------|-------|--------------|--------------|-------|--------------|--------------|-------|-------------|--------------|-------|
| acceptor    |              |       | donor        |              |       | Distance     |              |       |             |              |       |
| <b>TRP8</b> |              |       | <b>LEU12</b> |              |       | <b>2.52</b>  |              |       |             |              |       |
| <b>THR4</b> |              |       | <b>ILE6</b>  |              |       | <b>3.16</b>  |              |       |             |              |       |
| <b>TRP8</b> |              |       | <b>LYS10</b> |              |       | <b>3.21</b>  |              |       |             |              |       |
| <b>ASP7</b> |              |       | <b>ASN9</b>  |              |       | <b>3.51</b>  |              |       |             |              |       |
| <b>ASP7</b> |              |       | <b>LYS10</b> |              |       | <b>3.54</b>  |              |       |             |              |       |
| <b>LYS5</b> |              |       | <b>ASP7</b>  |              |       | <b>3.68</b>  |              |       |             |              |       |
| <b>ASN9</b> |              |       | <b>LEU12</b> |              |       | <b>3.92</b>  |              |       |             |              |       |
| <b>ASN9</b> |              |       | <b>ILE11</b> |              |       | <b>4.13</b>  |              |       |             |              |       |
| ff99SB OPC  |              |       |              |              |       | ff99SB TIP3P |              |       |             |              |       |
| EXTENDED    |              |       | MISFOLDED    |              |       | EXTENDED     |              |       | MISFOLDED   |              |       |
| acceptor    | donor        | occ%  | acceptor     | donor        | occ%  | acceptor     | donor        | occ%  | acceptor    | donor        | occ%  |
| <b>TRP8</b> | <b>LEU12</b> | 23.83 | ASN9         | SER13        | 18.21 | <b>TRP8</b>  | <b>LEU12</b> | 6.58  | <b>ASN9</b> | <b>ILE11</b> | 5.02  |
| ASN9        | SER13        | 21.21 | LYS5         | ASN9         | 17.94 | <b>THR4</b>  | <b>ILE6</b>  | 5.49  |             |              |       |
| LYS5        | ASN9         | 20.76 | TRP8         | LEU12        | 17.24 | ASN9         | SER13        | 5.42  |             |              |       |
| THR4        | TRP8         | 17.57 | THR4         | TRP8         | 14.43 | <b>ASN9</b>  | <b>ILE11</b> | 5.04  |             |              |       |
| ILE6        | LYS10        | 13.69 | THR2         | ILE6         | 12.52 |              |              |       |             |              |       |
| THR2        | ILE6         | 12.48 | ILE6         | LYS10        | 12.19 |              |              |       |             |              |       |
| ARG3        | ASP7         | 11.66 | ARG3         | ASP7         | 11.98 |              |              |       |             |              |       |
| TRP8        | ILE11        | 9.84  | ACE1         | LYS5         | 8.34  |              |              |       |             |              |       |
| THR4        | ASP7         | 7.66  | THR2         | LYS5         | 7.32  |              |              |       |             |              |       |
| THR2        | LYS5         | 7.37  | TRP8         | ILE11        | 7.25  |              |              |       |             |              |       |
| ASP7        | ILE11        | 7.35  | THR4         | ASP7         | 6.16  |              |              |       |             |              |       |
| ACE1        | LYS5         | 6.38  | ASP7         | ILE11        | 5.49  |              |              |       |             |              |       |
| ASP7        | LYS10        | 6.07  | ARG3         | TRP8         | 5.33  |              |              |       |             |              |       |
| ff14SB OPC  |              |       |              |              |       | ff14SB TIP3P |              |       |             |              |       |
| EXTENDED    |              |       | MISFOLDED    |              |       | EXTENDED     |              |       | MISFOLDED   |              |       |
| acceptor    | donor        | occ%  | acceptor     | donor        | occ%  | acceptor     | donor        | occ%  | acceptor    | donor        | occ%  |
| <b>TRP8</b> | <b>LEU12</b> | 21.07 | <b>TRP8</b>  | <b>LEU12</b> | 14.48 | <b>TRP8</b>  | <b>LEU12</b> | 43.80 | LYS5        | ASN9         | 34.73 |
| ASN9        | SER13        | 16.54 | ASN9         | SER13        | 13.31 | ASN9         | SER13        | 32.73 | <b>TRP8</b> | <b>LEU12</b> | 34.35 |
| LYS5        | ASN9         | 15.67 | LYS5         | ASN9         | 7.78  | ASP7         | ILE11        | 17.49 | ASN9        | SER13        | 32.10 |
| THR4        | TRP8         | 11.90 | THR4         | TRP8         | 7.24  | ACE1         | LYS5         | 16.26 | THR4        | TRP8         | 31.02 |
| ILE6        | LYS10        | 9.60  | THR2         | ILE6         | 6.60  | LYS5         | ASN9         | 14.05 | ILE6        | LYS10        | 26.98 |
| TRP8        | ILE11        | 9.34  | ASP7         | ILE11        | 6.57  | <b>ASP7</b>  | <b>LYS10</b> | 13.33 | ASP7        | ILE11        | 16.05 |
| ASP7        | ILE11        | 7.37  | TRP8         | ILE11        | 6.11  | ILE6         | LYS10        | 13.16 | ARG3        | ASP7         | 14.02 |
| <b>ASP7</b> | <b>LYS10</b> | 5.09  | <b>ASP7</b>  | <b>LYS10</b> | 6.09  | THR2         | ILE6         | 12.04 | THR2        | ILE6         | 10.92 |
|             |              |       | ARG3         | LYS5         | 5.35  | ARG3         | ASP7         | 10.51 | TRP8        | ILE11        | 7.68  |
|             |              |       | <b>THR4</b>  | <b>ILE6</b>  | 5.08  | THR2         | THR4         | 10.23 | THR4        | ASP7         | 6.43  |
|             |              |       | THR2         | ASP7         | 5.07  | THR4         | TRP8         | 9.43  | ACE1        | LYS5         | 6.14  |
|             |              |       |              |              |       | THR2         | LYS5         | 9.35  | THR2        | LYS5         | 5.27  |
|             |              |       |              |              |       | TRP8         | ILE11        | 9.11  |             |              |       |
|             |              |       |              |              |       | ACE1         | ILE6         | 7.38  |             |              |       |
|             |              |       |              |              |       | ILE6         | ARG3         | 6.30  |             |              |       |

| ff19SB OPC |       |      |             |              |      | ff19SB TIP3P |              |       |             |              |       |
|------------|-------|------|-------------|--------------|------|--------------|--------------|-------|-------------|--------------|-------|
| EXTENDED   |       |      | MISFOLDED   |              |      | EXTENDED     |              |       | MISFOLDED   |              |       |
| acceptor   | donor | occ% | acceptor    | donor        | occ% | acceptor     | donor        | occ%  | acceptor    | donor        | occ%  |
| LYS5       | ASN9  | 8.84 | ASN9        | SER13        | 6.87 | <b>TRP8</b>  | <b>LEU12</b> | 20.56 | <b>TRP8</b> | <b>LEU12</b> | 24.94 |
| THR4       | ASP7  | 6.32 | <b>TRP8</b> | <b>LEU12</b> | 5.89 | ASN9         | SER13        | 17.23 | ASN9        | SER13        | 16.97 |
| THR4       | TRP8  | 6.11 |             |              |      | THR4         | TRP8         | 15.66 | LYS5        | ASN9         | 13.61 |
| ASN9       | SER13 | 5.41 |             |              |      | LYS5         | ASN9         | 15.54 | <b>ASP7</b> | <b>LYS10</b> | 10.49 |
|            |       |      |             |              |      | ILE6         | LYS10        | 9.85  | ASP7        | ILE11        | 10.13 |
|            |       |      |             |              |      | ASP7         | ILE11        | 8.63  | THR4        | TRP8         | 9.96  |
|            |       |      |             |              |      | THR4         | ASP7         | 7.66  | ILE6        | LYS10        | 9.49  |
|            |       |      |             |              |      | <b>ASP7</b>  | <b>LYS10</b> | 7.05  | TRP8        | ILE11        | 7.73  |
|            |       |      |             |              |      | TRP8         | ILE11        | 6.77  | ILE6        | ASN9         | 6.92  |

**Table S11.** H-bond analyses from ID3 trajectories. Only H-bonds involving the backbone are included in the table (donor N-H, acceptor C=O). Native H-bonds are highlighted in bold.

| NATIVE       |              |              |
|--------------|--------------|--------------|
| acceptor     | donor        | Distance     |
| <b>THR3</b>  | <b>ARG5</b>  | <b>2.56</b>  |
| <b>MET10</b> | <b>THR13</b> | <b>2.59</b>  |
| <b>SER2</b>  | <b>SER4</b>  | <b>2.59</b>  |
| <b>THR3</b>  | <b>HIE6</b>  | <b>2.61</b>  |
| <b>SER2</b>  | <b>ARG5</b>  | <b>2.7</b>   |
| <b>MET10</b> | <b>LYS12</b> | <b>2.78</b>  |
| <b>ARG5</b>  | <b>LYS8</b>  | <b>2.83</b>  |
| <b>HIE6</b>  | <b>LEU9</b>  | <b>2.88</b>  |
| <b>MET10</b> | <b>GLU14</b> | <b>2.92</b>  |
| <b>SER4</b>  | <b>LYS7</b>  | <b>2.93</b>  |
| <b>LYS7</b>  | <b>MET10</b> | <b>2.95</b>  |
| <b>LYS12</b> | <b>GLU14</b> | <b>3.01</b>  |
| <b>ARG5</b>  | <b>LYS7</b>  | <b>3.07</b>  |
| <b>LYS8</b>  | <b>PHE11</b> | <b>3.08</b>  |
| <b>LEU9</b>  | <b>PHE11</b> | <b>3.08</b>  |
| <b>HIE6</b>  | <b>LYS8</b>  | <b>3.09</b>  |
| <b>LYS7</b>  | <b>LEU9</b>  | <b>3.19</b>  |
| <b>SER4</b>  | <b>HIE6</b>  | <b>3.25</b>  |
| <b>LYS8</b>  | <b>MET10</b> | <b>3.26</b>  |
| <b>LEU9</b>  | <b>LYS12</b> | <b>3.3</b>   |
| <b>HIE6</b>  | <b>MET10</b> | <b>3.34</b>  |
| <b>PHE11</b> | <b>GLU14</b> | <b>3.48</b>  |
| <b>LYS7</b>  | <b>PHE11</b> | <b>3.49</b>  |
| <b>SER4</b>  | <b>LYS8</b>  | <b>3.56</b>  |
| <b>PHE11</b> | <b>THR13</b> | <b>3.67</b>  |
| <b>ARG5</b>  | <b>LEU9</b>  | <b>3.68</b>  |
| <b>THR3</b>  | <b>LYS7</b>  | <b>3.78</b>  |
| <b>LEU9</b>  | <b>THR13</b> | <b>3.99</b>  |
| <b>GLU14</b> | <b>LYS12</b> | <b>4.16</b>  |
| ff99SB OPC   |              | ff99SB TIP3P |

| EXTENDED    |              |      |
|-------------|--------------|------|
| acceptor    | donor        | occ% |
| <b>1792</b> | <b>LYS7</b>  | 7.65 |
| SER2        | HIE6         | 6.12 |
| <b>HIE6</b> | <b>MET10</b> | 5.10 |
| <b>SER4</b> | <b>LYS8</b>  | 5.01 |

| MISFOLDED   |             |      |
|-------------|-------------|------|
| acceptor    | donor       | occ% |
| SER2        | HIP6        | 8.15 |
| <b>THR3</b> | <b>LYS7</b> | 7.12 |
| ACE1        | ARG5        | 5.41 |

| EXTENDED     |              |       |
|--------------|--------------|-------|
| acceptor     | donor        | occ%  |
| <b>HIE6</b>  | <b>MET10</b> | 17.34 |
| SER2         | HIE6         | 15.73 |
| <b>ARG5</b>  | <b>LEU9</b>  | 14.42 |
| <b>LYS7</b>  | <b>PHE11</b> | 14.16 |
| <b>SER4</b>  | <b>LYS8</b>  | 12.11 |
| ACE1         | ARG5         | 10.18 |
| <b>THR3</b>  | <b>LYS7</b>  | 9.37  |
| <b>MET10</b> | <b>GLU14</b> | 8.13  |
| LYS8         | LYS12        | 7.92  |
| <b>SER2</b>  | <b>ARG5</b>  | 7.02  |
| <b>LEU9</b>  | <b>THR13</b> | 6.04  |
| <b>HIE6</b>  | <b>LEU9</b>  | 5.01  |

| MISFOLDED    |              |       |
|--------------|--------------|-------|
| acceptor     | donor        | occ%  |
| <b>THR3</b>  | <b>LYS7</b>  | 18.82 |
| SER2         | HIP6         | 18.13 |
| <b>SER4</b>  | <b>LYS8</b>  | 15.22 |
| HIP6         | MET10        | 15.17 |
| ACE1         | ARG5         | 14.59 |
| <b>LYS7</b>  | <b>PHE11</b> | 13.56 |
| <b>MET10</b> | <b>GLU14</b> | 11.67 |
| LYS8         | LYS12        | 11.44 |
| <b>ARG5</b>  | <b>LEU9</b>  | 11.24 |
| <b>LEU9</b>  | <b>THR13</b> | 7.87  |

| ff14SB OPC   |              |       |              |              |       |
|--------------|--------------|-------|--------------|--------------|-------|
| EXTENDED     |              |       | MISFOLDED    |              |       |
| acceptor     | donor        | occ%  | acceptor     | donor        | occ%  |
| <b>HIE6</b>  | <b>MET10</b> | 13.64 | <b>THR3</b>  | <b>LYS7</b>  | 27.30 |
| <b>LYS7</b>  | <b>PHE11</b> | 10.50 | SER2         | HIP6         | 25.49 |
| <b>MET10</b> | <b>GLU14</b> | 9.14  | <b>SER4</b>  | <b>LYS8</b>  | 24.71 |
| SER2         | HIE6         | 6.32  | HIP6         | MET10        | 23.50 |
| <b>LEU9</b>  | <b>THR13</b> | 5.44  | <b>ARG5</b>  | <b>LEU9</b>  | 19.84 |
| <b>HIE6</b>  | <b>LEU9</b>  | 5.04  | ACE1         | ARG5         | 17.80 |
|              |              |       | <b>LYS7</b>  | <b>PHE11</b> | 16.73 |
|              |              |       | <b>LEU9</b>  | <b>THR13</b> | 10.52 |
|              |              |       | LYS8         | LYS12        | 10.38 |
|              |              |       | <b>MET10</b> | <b>GLU14</b> | 10.33 |

| ff14SB TIP3P |              |       |              |              |       |
|--------------|--------------|-------|--------------|--------------|-------|
| EXTENDED     |              |       | MISFOLDED    |              |       |
| acceptor     | donor        | occ%  | acceptor     | donor        | occ%  |
| <b>HIE6</b>  | <b>MET10</b> | 50.07 | <b>THR3</b>  | <b>LYS7</b>  | 48.00 |
| <b>LYS7</b>  | <b>PHE11</b> | 42.78 | SER2         | HIP6         | 43.97 |
| <b>SER4</b>  | <b>LYS8</b>  | 41.18 | <b>SER4</b>  | <b>LYS8</b>  | 40.34 |
| <b>ARG5</b>  | <b>LEU9</b>  | 39.36 | HIP6         | MET10        | 37.80 |
| <b>THR3</b>  | <b>LYS7</b>  | 37.22 | <b>ARG5</b>  | <b>LEU9</b>  | 35.00 |
| <b>MET10</b> | <b>GLU14</b> | 26.65 | <b>LYS7</b>  | <b>PHE11</b> | 32.72 |
| LYS8         | LYS12        | 26.30 | ACE1         | ARG5         | 30.94 |
| SER2         | HIE6         | 25.43 | <b>MET10</b> | <b>GLU14</b> | 26.32 |
| <b>LEU9</b>  | <b>THR13</b> | 23.56 | LYS8         | LYS12        | 25.39 |
| ACE1         | ARG5         | 22.46 | <b>LEU9</b>  | <b>THR13</b> | 21.77 |
| LYS8         | THR13        | 5.00  |              |              |       |

| ff19SB OPC  |              |      |           |       |      |
|-------------|--------------|------|-----------|-------|------|
| EXTENDED    |              |      | MISFOLDED |       |      |
| acceptor    | donor        | occ% | acceptor  | donor | occ% |
| <b>HIE6</b> | <b>MET10</b> | 9.60 |           |       |      |
| <b>LYS7</b> | <b>PHE11</b> | 9.57 |           |       |      |
| <b>HIE6</b> | <b>LEU9</b>  | 8.39 |           |       |      |
| <b>LYS7</b> | <b>MET10</b> | 5.89 |           |       |      |

| ff19SB TIP3P |              |       |             |              |       |
|--------------|--------------|-------|-------------|--------------|-------|
| EXTENDED     |              |       | MISFOLDED   |              |       |
| acceptor     | donor        | occ%  | acceptor    | donor        | occ%  |
| <b>HIE6</b>  | <b>MET10</b> | 13.28 | HIP6        | MET10        | 11.72 |
| <b>SER4</b>  | <b>LYS8</b>  | 11.79 | <b>ARG5</b> | <b>LEU9</b>  | 11.58 |
| <b>LYS7</b>  | <b>PHE11</b> | 11.03 | <b>LYS7</b> | <b>PHE11</b> | 10.63 |
| <b>ARG5</b>  | <b>LEU9</b>  | 9.60  | <b>SER4</b> | <b>LYS8</b>  | 10.11 |
| LYS8         | LYS12        | 8.91  | <b>THR3</b> | <b>LYS7</b>  | 5.80  |
| <b>LEU9</b>  | <b>LYS12</b> | 6.82  |             |              |       |
| <b>LYS8</b>  | <b>PHE11</b> | 6.66  |             |              |       |
| <b>HIE6</b>  | <b>LEU9</b>  | 6.13  |             |              |       |
| <b>THR3</b>  | <b>LYS7</b>  | 6.09  |             |              |       |
| <b>LEU9</b>  | <b>THR13</b> | 5.63  |             |              |       |
| <b>MET10</b> | <b>GLU14</b> | 5.49  |             |              |       |
| <b>SER4</b>  | <b>LYS7</b>  | 5.17  |             |              |       |



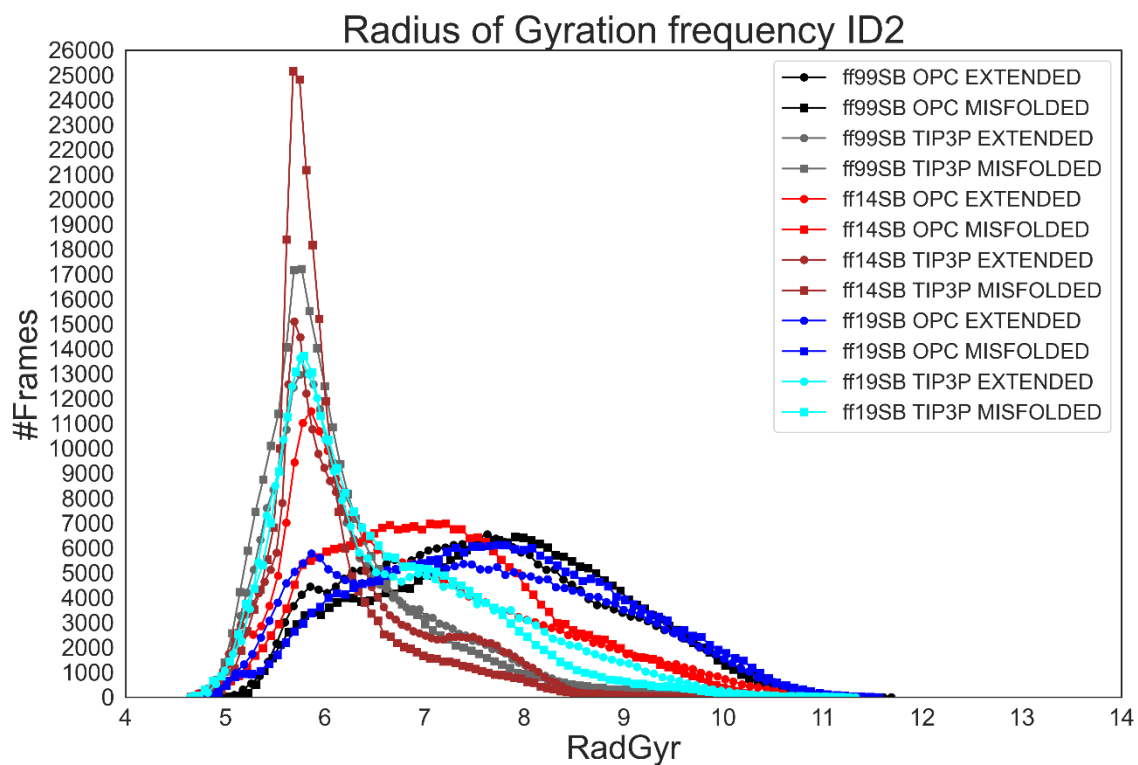

Figure S116. Radius of gyration frequencies calculated on the last 500 ns of ID2 trajectories.

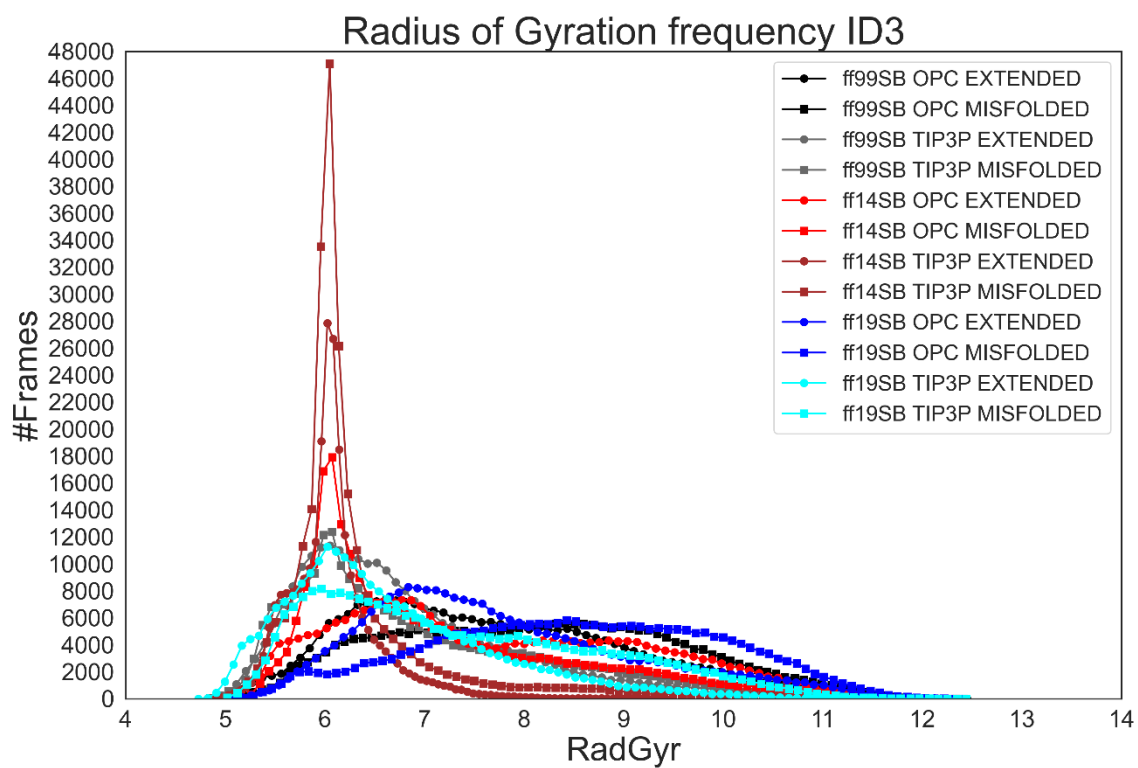

Figure S117. Radius of gyration frequencies calculated on the last 500 ns of ID3 trajectories.

## PDB coordinate of the starting structures.

### H1 extended

|                                                      |                                                       |
|------------------------------------------------------|-------------------------------------------------------|
| ATOM 1 CH3 ACE 1 33.886 24.866 20.687 1.00 0.00 C    | ATOM 71 CG TYR 9 20.105 23.674 31.790 1.00 0.00 C     |
| ATOM 2 C ACE 1 34.349 25.487 22.029 1.00 0.00 C      | ATOM 72 CD1 TYR 9 19.691 22.512 32.511 1.00 0.00 C    |
| ATOM 3 O ACE 1 35.523 25.237 22.383 1.00 0.00 O      | ATOM 73 CE1 TYR 9 20.159 22.268 33.858 1.00 0.00 C    |
| ATOM 4 N LYS 2 33.495 26.383 22.610 1.00 0.00 N      | ATOM 74 CZ TYR 9 21.124 23.171 34.354 1.00 0.00 C     |
| ATOM 5 CA LYS 2 33.521 27.193 23.881 1.00 0.00 C     | ATOM 75 OH TYR 9 21.570 23.102 35.677 1.00 0.00 O     |
| ATOM 6 CB LYS 2 34.328 28.544 23.721 1.00 0.00 C     | ATOM 76 CE2 TYR 9 21.672 24.205 33.572 1.00 0.00 C    |
| ATOM 7 CG LYS 2 33.715 29.463 22.665 1.00 0.00 C     | ATOM 77 CD2 TYR 9 21.107 24.533 32.340 1.00 0.00 C    |
| ATOM 8 CD LYS 2 34.444 30.836 22.501 1.00 0.00 C     | ATOM 78 C TYR 9 19.399 22.689 28.048 1.00 0.00 C      |
| ATOM 9 CE LYS 2 34.253 31.767 23.672 1.00 0.00 C     | ATOM 79 O TYR 9 18.208 22.392 28.037 1.00 0.00 O      |
| ATOM 10 NZ LYS 2 34.819 33.142 23.409 1.00 0.00 N1+  | ATOM 80 N GLN 10 20.046 22.820 26.873 1.00 0.00 N     |
| ATOM 11 C LYS 2 32.059 27.345 24.436 1.00 0.00 C     | ATOM 81 CA GLN 10 19.725 22.145 25.615 1.00 0.00 C    |
| ATOM 12 O LYS 2 31.046 27.373 23.727 1.00 0.00 O     | ATOM 82 CB GLN 10 19.687 23.127 24.450 1.00 0.00 C    |
| ATOM 13 N LEU 3 31.923 27.417 25.779 1.00 0.00 N     | ATOM 83 CG GLN 10 18.307 23.884 24.531 1.00 0.00 C    |
| ATOM 14 CA LEU 3 30.600 27.108 26.345 1.00 0.00 C    | ATOM 84 CD GLN 10 18.061 24.905 23.403 1.00 0.00 C    |
| ATOM 15 CB LEU 3 30.847 25.882 27.303 1.00 0.00 C    | ATOM 85 OE1 GLN 10 18.436 24.799 22.242 1.00 0.00 O   |
| ATOM 16 CG LEU 3 29.715 25.411 28.161 1.00 0.00 C    | ATOM 86 NE2 GLN 10 17.273 25.924 23.717 1.00 0.00 N   |
| ATOM 17 CD1 LEU 3 28.525 24.979 27.268 1.00 0.00 C   | ATOM 87 C GLN 10 20.656 20.884 25.312 1.00 0.00 C     |
| ATOM 18 CD2 LEU 3 30.147 24.264 28.963 1.00 0.00 C   | ATOM 88 O GLN 10 20.165 19.845 24.826 1.00 0.00 O     |
| ATOM 19 C LEU 3 30.098 28.295 27.216 1.00 0.00 C     | ATOM 89 N LEU 11 21.923 20.962 25.703 1.00 0.00 N     |
| ATOM 20 O LEU 3 30.770 28.660 28.174 1.00 0.00 O     | ATOM 90 CA LEU 11 22.962 19.918 25.650 1.00 0.00 C    |
| ATOM 21 N THR 4 28.943 28.772 26.922 1.00 0.00 N     | ATOM 91 CB LEU 11 24.332 20.488 26.010 1.00 0.00 C    |
| ATOM 22 CA THR 4 28.124 29.588 27.862 1.00 0.00 C    | ATOM 92 CG LEU 11 25.533 19.676 25.462 1.00 0.00 C    |
| ATOM 23 CB THR 4 27.292 30.615 27.131 1.00 0.00 C    | ATOM 93 CD1 LEU 11 25.720 19.993 23.943 1.00 0.00 C   |
| ATOM 24 CG2 THR 4 28.245 31.849 26.715 1.00 0.00 C   | ATOM 94 CD2 LEU 11 26.969 19.826 26.081 1.00 0.00 C   |
| ATOM 25 OG1 THR 4 26.516 30.116 26.042 1.00 0.00 O   | ATOM 95 C LEU 11 22.673 18.635 26.492 1.00 0.00 C     |
| ATOM 26 C THR 4 27.170 28.751 28.688 1.00 0.00 C     | ATOM 96 O LEU 11 22.929 17.594 26.006 1.00 0.00 O     |
| ATOM 27 O THR 4 26.631 27.757 28.164 1.00 0.00 O     | ATOM 97 N LYS 12 22.036 18.756 27.632 1.00 0.00 N     |
| ATOM 28 N TRP 5 26.992 29.046 30.013 1.00 0.00 N     | ATOM 98 CA LYS 12 21.665 17.559 28.524 1.00 0.00 C    |
| ATOM 29 CA TRP 5 26.156 28.193 30.953 1.00 0.00 C    | ATOM 99 CB LYS 12 21.353 18.149 29.969 1.00 0.00 C    |
| ATOM 30 CB TRP 5 26.186 28.781 32.341 1.00 0.00 C    | ATOM 100 CG LYS 12 21.380 17.101 31.048 1.00 0.00 C   |
| ATOM 31 CG TRP 5 25.582 30.165 32.384 1.00 0.00 C    | ATOM 101 CD LYS 12 21.158 17.717 32.393 1.00 0.00 C   |
| ATOM 32 CD1 TRP 5 26.288 31.318 32.276 1.00 0.00 C   | ATOM 102 CE LYS 12 21.488 16.864 33.631 1.00 0.00 C   |
| ATOM 33 NE1 TRP 5 25.329 32.344 32.241 1.00 0.00 N   | ATOM 103 NZ LYS 12 20.608 15.707 33.921 1.00 0.00 N1+ |
| ATOM 34 CE2 TRP 5 24.063 31.879 32.527 1.00 0.00 C   | ATOM 104 C LYS 12 20.617 16.610 27.890 1.00 0.00 C    |
| ATOM 35 CZ2 TRP 5 22.846 32.559 32.674 1.00 0.00 C   | ATOM 105 O LYS 12 20.562 15.449 28.258 1.00 0.00 O    |
| ATOM 36 CH2 TRP 5 21.722 31.764 32.868 1.00 0.00 C   | ATOM 106 N TYR 13 19.785 17.090 26.935 1.00 0.00 N    |
| ATOM 37 CZ3 TRP 5 21.804 30.382 33.043 1.00 0.00 C   | ATOM 107 CA TYR 13 18.585 16.440 26.332 1.00 0.00 C   |
| ATOM 38 CE3 TRP 5 23.013 29.735 32.875 1.00 0.00 C   | ATOM 108 CB TYR 13 17.327 17.308 26.571 1.00 0.00 C   |
| ATOM 39 CD2 TRP 5 24.210 30.482 32.643 1.00 0.00 C   | ATOM 109 CG TYR 13 16.976 17.423 28.029 1.00 0.00 C   |
| ATOM 40 C TRP 5 24.728 27.828 30.447 1.00 0.00 C     | ATOM 110 CD1 TYR 13 16.988 18.661 28.705 1.00 0.00 C  |
| ATOM 41 O TRP 5 24.091 26.781 30.816 1.00 0.00 O     | ATOM 111 CE1 TYR 13 16.699 18.801 30.061 1.00 0.00 C  |
| ATOM 42 N GLN 6 24.172 28.762 29.668 1.00 0.00 N     | ATOM 112 CZ TYR 13 16.417 17.628 30.792 1.00 0.00 C   |
| ATOM 43 CA GLN 6 22.885 28.523 28.973 1.00 0.00 C    | ATOM 113 OH TYR 13 16.188 17.721 32.137 1.00 0.00 O   |
| ATOM 44 CB GLN 6 22.498 29.852 28.287 1.00 0.00 C    | ATOM 114 CE2 TYR 13 16.410 16.340 30.155 1.00 0.00 C  |
| ATOM 45 CG GLN 6 22.587 31.121 29.099 1.00 0.00 C    | ATOM 115 CD2 TYR 13 16.697 16.268 28.734 1.00 0.00 C  |
| ATOM 46 CD GLN 6 22.412 32.291 28.172 1.00 0.00 C    | ATOM 116 C TYR 13 18.859 16.159 24.831 1.00 0.00 C    |
| ATOM 47 OE1 GLN 6 23.316 32.556 27.384 1.00 0.00 O   | ATOM 117 O TYR 13 18.509 15.087 24.317 1.00 0.00 O    |
| ATOM 48 NE2 GLN 6 21.203 32.738 28.006 1.00 0.00 N   | ATOM 118 N LYS 14 19.424 17.062 24.051 1.00 0.00 N    |
| ATOM 49 C GLN 6 22.814 27.395 27.871 1.00 0.00 C     | ATOM 119 CA LYS 14 19.886 16.800 22.689 1.00 0.00 C   |
| ATOM 50 O GLN 6 21.666 27.039 27.608 1.00 0.00 O     | ATOM 120 CB LYS 14 20.306 18.148 22.094 1.00 0.00 C   |
| ATOM 51 N GLU 7 23.965 26.797 27.497 1.00 0.00 N     | ATOM 121 CG LYS 14 20.753 18.075 20.557 1.00 0.00 C   |
| ATOM 52 CA GLU 7 23.863 25.708 26.404 1.00 0.00 C    | ATOM 122 CD LYS 14 21.616 19.231 20.084 1.00 0.00 C   |
| ATOM 53 CB GLU 7 25.123 25.744 25.455 1.00 0.00 C    | ATOM 123 CE LYS 14 20.796 20.538 20.141 1.00 0.00 C   |
| ATOM 54 CG GLU 7 25.083 27.024 24.556 1.00 0.00 C    | ATOM 124 NZ LYS 14 21.556 21.656 19.644 1.00 0.00 N1+ |
| ATOM 55 CD GLU 7 26.410 27.203 23.864 1.00 0.00 C    | ATOM 125 C LYS 14 20.837 15.685 22.495 1.00 0.00 C    |
| ATOM 56 OE1 GLU 7 27.263 27.882 24.478 1.00 0.00 O   | ATOM 126 O LYS 14 20.658 14.937 21.495 1.00 0.00 O    |
| ATOM 57 OE2 GLU 7 26.527 26.829 22.708 1.00 0.00 O1- | ATOM 127 N GLY 15 21.813 15.564 23.421 1.00 0.00 N    |
| ATOM 58 C GLU 7 23.726 24.335 27.089 1.00 0.00 C     | ATOM 128 CA GLY 15 23.008 14.810 23.424 1.00 0.00 C   |
| ATOM 59 O GLU 7 23.169 23.430 26.517 1.00 0.00 O     | ATOM 129 C GLY 15 24.087 15.227 22.415 1.00 0.00 C    |
| ATOM 60 N LEU 8 24.224 24.139 28.346 1.00 0.00 N     | ATOM 130 O GLY 15 23.803 15.951 21.463 1.00 0.00 O    |
| ATOM 61 CA LEU 8 23.976 22.903 29.089 1.00 0.00 C    | ATOM 131 N ILE 16 25.315 14.697 22.628 1.00 0.00 N    |
| ATOM 62 CB LEU 8 24.497 23.062 30.515 1.00 0.00 C    | ATOM 132 CA ILE 16 26.475 15.229 21.913 1.00 0.00 C   |
| ATOM 63 CG LEU 8 26.076 23.131 30.667 1.00 0.00 C    | ATOM 133 CB ILE 16 27.655 14.961 22.930 1.00 0.00 C   |
| ATOM 64 CD1 LEU 8 26.270 22.916 32.210 1.00 0.00 C   | ATOM 134 CG2 ILE 16 27.542 15.868 24.167 1.00 0.00 C  |
| ATOM 65 CD2 LEU 8 26.762 21.929 30.005 1.00 0.00 C   | ATOM 135 CG1 ILE 16 28.106 13.472 23.104 1.00 0.00 C  |
| ATOM 66 C LEU 8 22.526 22.391 29.168 1.00 0.00 C     | ATOM 136 CD1 ILE 16 29.241 13.161 24.170 1.00 0.00 C  |
| ATOM 67 O LEU 8 22.319 21.195 29.108 1.00 0.00 O     | ATOM 137 C ILE 16 26.685 14.560 20.547 1.00 0.00 C    |
| ATOM 68 N TYR 9 21.535 23.194 29.197 1.00 0.00 N     | ATOM 138 O ILE 16 26.046 13.594 20.109 1.00 0.00 O    |
| ATOM 69 CA TYR 9 20.129 22.872 29.380 1.00 0.00 C    | ATOM 139 N NHE 17 27.545 15.187 19.756 1.00 0.00 N    |
| ATOM 70 CB TYR 9 19.533 23.856 30.394 1.00 0.00 C    | TER 140 NHE 17                                        |

## H1 misfolded

|         |     |     |   |        |        |        |      |      |     |          |     |     |    |        |        |        |      |      |     |
|---------|-----|-----|---|--------|--------|--------|------|------|-----|----------|-----|-----|----|--------|--------|--------|------|------|-----|
| ATOM 1  | CH3 | ACE | 1 | 16.354 | 36.122 | 18.628 | 1.00 | 0.00 | C   | ATOM 71  | CG  | TYR | 9  | 31.119 | 26.892 | 32.747 | 1.00 | 0.00 | C   |
| ATOM 2  | C   | ACE | 1 | 16.263 | 34.604 | 18.876 | 1.00 | 0.00 | C   | ATOM 72  | CD1 | TYR | 9  | 29.916 | 26.753 | 33.379 | 1.00 | 0.00 | C   |
| ATOM 3  | O   | ACE | 1 | 15.147 | 34.127 | 19.105 | 1.00 | 0.00 | O   | ATOM 73  | CE1 | TYR | 9  | 29.654 | 27.315 | 34.658 | 1.00 | 0.00 | C   |
| ATOM 4  | N   | LYS | 2 | 17.384 | 33.844 | 18.658 | 1.00 | 0.00 | N   | ATOM 74  | CZ  | TYR | 9  | 30.677 | 27.931 | 35.368 | 1.00 | 0.00 | C   |
| ATOM 5  | CA  | LYS | 2 | 17.445 | 32.376 | 18.946 | 1.00 | 0.00 | C   | ATOM 75  | OH  | TYR | 9  | 30.354 | 28.439 | 36.610 | 1.00 | 0.00 | O   |
| ATOM 6  | CB  | LYS | 2 | 17.580 | 31.658 | 17.542 | 1.00 | 0.00 | C   | ATOM 76  | CE2 | TYR | 9  | 31.996 | 28.002 | 34.755 | 1.00 | 0.00 | C   |
| ATOM 7  | CG  | LYS | 2 | 17.449 | 30.116 | 17.547 | 1.00 | 0.00 | C   | ATOM 77  | CD2 | TYR | 9  | 32.199 | 27.525 | 33.439 | 1.00 | 0.00 | C   |
| ATOM 8  | CD  | LYS | 2 | 17.430 | 29.435 | 16.187 | 1.00 | 0.00 | C   | ATOM 78  | C   | TYR | 9  | 32.306 | 24.033 | 32.000 | 1.00 | 0.00 | C   |
| ATOM 9  | CE  | LYS | 2 | 18.808 | 29.378 | 15.551 | 1.00 | 0.00 | C   | ATOM 79  | O   | TYR | 9  | 32.253 | 22.911 | 31.478 | 1.00 | 0.00 | O   |
| ATOM 10 | NZ  | LYS | 2 | 19.789 | 28.389 | 16.064 | 1.00 | 0.00 | N1+ | ATOM 80  | N   | GLN | 10 | 32.485 | 24.175 | 33.348 | 1.00 | 0.00 | N   |
| ATOM 11 | C   | LYS | 2 | 18.653 | 32.048 | 19.804 | 1.00 | 0.00 | C   | ATOM 81  | CA  | GLN | 10 | 32.258 | 23.036 | 34.253 | 1.00 | 0.00 | C   |
| ATOM 12 | O   | LYS | 2 | 19.602 | 32.839 | 19.852 | 1.00 | 0.00 | O   | ATOM 82  | CB  | GLN | 10 | 32.435 | 23.560 | 35.763 | 1.00 | 0.00 | C   |
| ATOM 13 | N   | LEU | 3 | 18.656 | 30.926 | 20.485 | 1.00 | 0.00 | N   | ATOM 83  | CG  | GLN | 10 | 33.890 | 23.714 | 36.151 | 1.00 | 0.00 | C   |
| ATOM 14 | CA  | LEU | 3 | 19.738 | 30.456 | 21.339 | 1.00 | 0.00 | C   | ATOM 84  | CD  | GLN | 10 | 34.333 | 24.030 | 37.528 | 1.00 | 0.00 | C   |
| ATOM 15 | CB  | LEU | 3 | 19.199 | 29.293 | 22.198 | 1.00 | 0.00 | C   | ATOM 85  | OE1 | GLN | 10 | 34.381 | 25.161 | 37.990 | 1.00 | 0.00 | O   |
| ATOM 16 | CG  | LEU | 3 | 20.199 | 28.788 | 23.213 | 1.00 | 0.00 | C   | ATOM 86  | NE2 | GLN | 10 | 34.681 | 23.002 | 38.314 | 1.00 | 0.00 | N   |
| ATOM 17 | CD1 | LEU | 3 | 20.671 | 29.787 | 24.256 | 1.00 | 0.00 | C   | ATOM 87  | C   | GLN | 10 | 30.837 | 22.455 | 33.989 | 1.00 | 0.00 | C   |
| ATOM 18 | CD2 | LEU | 3 | 19.597 | 27.635 | 23.974 | 1.00 | 0.00 | C   | ATOM 88  | O   | GLN | 10 | 30.649 | 21.279 | 33.725 | 1.00 | 0.00 | O   |
| ATOM 19 | C   | LEU | 3 | 20.969 | 29.933 | 20.524 | 1.00 | 0.00 | C   | ATOM 89  | N   | LEU | 11 | 29.829 | 23.359 | 34.103 | 1.00 | 0.00 | N   |
| ATOM 20 | O   | LEU | 3 | 20.817 | 29.097 | 19.630 | 1.00 | 0.00 | O   | ATOM 90  | CA  | LEU | 11 | 28.428 | 22.992 | 33.843 | 1.00 | 0.00 | C   |
| ATOM 21 | N   | THR | 4 | 22.165 | 30.418 | 20.816 | 1.00 | 0.00 | N   | ATOM 91  | CB  | LEU | 11 | 27.492 | 23.898 | 34.670 | 1.00 | 0.00 | C   |
| ATOM 22 | CA  | THR | 4 | 23.411 | 29.913 | 20.259 | 1.00 | 0.00 | C   | ATOM 92  | CG  | LEU | 11 | 25.985 | 23.718 | 34.684 | 1.00 | 0.00 | C   |
| ATOM 23 | CB  | THR | 4 | 24.020 | 30.965 | 19.267 | 1.00 | 0.00 | C   | ATOM 93  | CD1 | LEU | 11 | 25.568 | 22.310 | 34.970 | 1.00 | 0.00 | C   |
| ATOM 24 | CG2 | THR | 4 | 23.177 | 31.206 | 18.019 | 1.00 | 0.00 | C   | ATOM 94  | CD2 | LEU | 11 | 25.306 | 24.595 | 35.690 | 1.00 | 0.00 | C   |
| ATOM 25 | OG1 | THR | 4 | 24.339 | 32.238 | 19.851 | 1.00 | 0.00 | O   | ATOM 95  | C   | LEU | 11 | 28.164 | 23.054 | 32.294 | 1.00 | 0.00 | C   |
| ATOM 26 | C   | THR | 4 | 24.423 | 29.597 | 21.337 | 1.00 | 0.00 | C   | ATOM 96  | O   | LEU | 11 | 27.909 | 24.141 | 31.797 | 1.00 | 0.00 | O   |
| ATOM 27 | O   | THR | 4 | 24.617 | 30.282 | 22.322 | 1.00 | 0.00 | O   | ATOM 97  | N   | LYS | 12 | 28.264 | 21.849 | 31.652 | 1.00 | 0.00 | N   |
| ATOM 28 | N   | TRP | 5 | 25.125 | 28.410 | 21.206 | 1.00 | 0.00 | N   | ATOM 98  | CA  | LYS | 12 | 28.120 | 21.651 | 30.182 | 1.00 | 0.00 | C   |
| ATOM 29 | CA  | TRP | 5 | 26.331 | 28.005 | 21.913 | 1.00 | 0.00 | C   | ATOM 99  | CB  | LYS | 12 | 26.654 | 21.295 | 29.829 | 1.00 | 0.00 | C   |
| ATOM 30 | CB  | TRP | 5 | 26.751 | 26.684 | 21.191 | 1.00 | 0.00 | C   | ATOM 100 | CG  | LYS | 12 | 26.165 | 19.896 | 30.240 | 1.00 | 0.00 | C   |
| ATOM 31 | CG  | TRP | 5 | 27.720 | 25.815 | 21.941 | 1.00 | 0.00 | C   | ATOM 101 | CD  | LYS | 12 | 24.707 | 19.636 | 29.852 | 1.00 | 0.00 | C   |
| ATOM 32 | CD1 | TRP | 5 | 27.434 | 24.660 | 22.583 | 1.00 | 0.00 | C   | ATOM 102 | CE  | LYS | 12 | 24.010 | 18.371 | 30.344 | 1.00 | 0.00 | C   |
| ATOM 33 | NE1 | TRP | 5 | 28.644 | 24.052 | 22.902 | 1.00 | 0.00 | N   | ATOM 103 | NZ  | LYS | 12 | 22.795 | 18.040 | 29.592 | 1.00 | 0.00 | N1+ |
| ATOM 34 | CE2 | TRP | 5 | 29.690 | 24.831 | 22.556 | 1.00 | 0.00 | C   | ATOM 104 | C   | LYS | 12 | 28.711 | 22.848 | 29.383 | 1.00 | 0.00 | C   |
| ATOM 35 | CZ2 | TRP | 5 | 31.104 | 24.602 | 22.607 | 1.00 | 0.00 | C   | ATOM 105 | O   | LYS | 12 | 29.926 | 22.936 | 29.224 | 1.00 | 0.00 | O   |
| ATOM 36 | CH2 | TRP | 5 | 32.026 | 25.566 | 22.177 | 1.00 | 0.00 | C   | ATOM 106 | N   | TYR | 13 | 27.891 | 23.805 | 28.925 | 1.00 | 0.00 | N   |
| ATOM 37 | CZ3 | TRP | 5 | 31.458 | 26.573 | 21.401 | 1.00 | 0.00 | C   | ATOM 107 | CA  | TYR | 13 | 28.384 | 24.923 | 28.093 | 1.00 | 0.00 | C   |
| ATOM 38 | CE3 | TRP | 5 | 30.038 | 26.820 | 21.340 | 1.00 | 0.00 | C   | ATOM 108 | CB  | TYR | 13 | 28.671 | 24.456 | 26.691 | 1.00 | 0.00 | C   |
| ATOM 39 | CD2 | TRP | 5 | 29.130 | 25.972 | 21.935 | 1.00 | 0.00 | C   | ATOM 109 | CG  | TYR | 13 | 27.807 | 23.477 | 25.978 | 1.00 | 0.00 | C   |
| ATOM 40 | C   | TRP | 5 | 27.411 | 29.119 | 21.982 | 1.00 | 0.00 | C   | ATOM 110 | CD1 | TYR | 13 | 28.184 | 22.091 | 25.961 | 1.00 | 0.00 | C   |
| ATOM 41 | O   | TRP | 5 | 27.613 | 29.785 | 20.985 | 1.00 | 0.00 | O   | ATOM 111 | CE1 | TYR | 13 | 27.233 | 21.176 | 25.501 | 1.00 | 0.00 | C   |
| ATOM 42 | N   | GLN | 6 | 28.125 | 29.253 | 23.112 | 1.00 | 0.00 | N   | ATOM 112 | CZ  | TYR | 13 | 25.968 | 21.526 | 25.043 | 1.00 | 0.00 | C   |
| ATOM 43 | CA  | GLN | 6 | 29.264 | 30.128 | 23.304 | 1.00 | 0.00 | N   | ATOM 113 | OH  | TYR | 13 | 25.162 | 20.527 | 24.522 | 1.00 | 0.00 | O   |
| ATOM 44 | CB  | GLN | 6 | 28.911 | 31.119 | 24.400 | 1.00 | 0.00 | C   | ATOM 114 | CE2 | TYR | 13 | 25.585 | 22.903 | 25.018 | 1.00 | 0.00 | C   |
| ATOM 45 | CG  | GLN | 6 | 29.950 | 32.195 | 24.595 | 1.00 | 0.00 | C   | ATOM 115 | CD2 | TYR | 13 | 26.529 | 23.857 | 25.484 | 1.00 | 0.00 | C   |
| ATOM 46 | CD  | GLN | 6 | 29.691 | 33.005 | 25.773 | 1.00 | 0.00 | C   | ATOM 116 | C   | TYR | 13 | 27.393 | 26.121 | 28.215 | 1.00 | 0.00 | C   |
| ATOM 47 | OE1 | GLN | 6 | 28.703 | 33.743 | 25.843 | 1.00 | 0.00 | O   | ATOM 117 | O   | TYR | 13 | 26.214 | 26.002 | 28.553 | 1.00 | 0.00 | O   |
| ATOM 48 | NE2 | GLN | 6 | 30.555 | 32.922 | 26.764 | 1.00 | 0.00 | N   | ATOM 118 | N   | LYS | 14 | 27.904 | 27.356 | 28.071 | 1.00 | 0.00 | N   |
| ATOM 49 | C   | GLN | 6 | 30.613 | 29.338 | 23.521 | 1.00 | 0.00 | C   | ATOM 119 | CA  | LYS | 14 | 26.982 | 28.537 | 28.065 | 1.00 | 0.00 | C   |
| ATOM 50 | O   | GLN | 6 | 31.478 | 29.475 | 22.658 | 1.00 | 0.00 | O   | ATOM 120 | CB  | LYS | 14 | 27.938 | 29.703 | 28.410 | 1.00 | 0.00 | C   |
| ATOM 51 | N   | GLU | 7 | 30.757 | 28.662 | 24.625 | 1.00 | 0.00 | N   | ATOM 121 | CG  | LYS | 14 | 28.747 | 29.455 | 29.640 | 1.00 | 0.00 | C   |
| ATOM 52 | CA  | GLU | 7 | 31.953 | 27.969 | 25.143 | 1.00 | 0.00 | C   | ATOM 122 | CD  | LYS | 14 | 29.582 | 30.620 | 30.027 | 1.00 | 0.00 | C   |
| ATOM 53 | CB  | GLU | 7 | 32.888 | 28.982 | 25.857 | 1.00 | 0.00 | C   | ATOM 123 | CE  | LYS | 14 | 30.438 | 30.213 | 31.262 | 1.00 | 0.00 | C   |
| ATOM 54 | CG  | GLU | 7 | 32.170 | 29.773 | 26.962 | 1.00 | 0.00 | C   | ATOM 124 | NZ  | LYS | 14 | 31.220 | 31.359 | 31.752 | 1.00 | 0.00 | N1+ |
| ATOM 55 | CD  | GLU | 7 | 33.142 | 30.587 | 27.760 | 1.00 | 0.00 | C   | ATOM 125 | C   | LYS | 14 | 26.453 | 28.790 | 26.707 | 1.00 | 0.00 | C   |
| ATOM 56 | OE1 | GLU | 7 | 33.329 | 30.175 | 28.912 | 1.00 | 0.00 | O   | ATOM 126 | O   | LYS | 14 | 27.148 | 28.429 | 25.779 | 1.00 | 0.00 | O   |
| ATOM 57 | OE2 | GLU | 7 | 33.675 | 31.717 | 27.415 | 1.00 | 0.00 | O1- | ATOM 127 | N   | GLY | 15 | 25.394 | 29.560 | 26.658 | 1.00 | 0.00 | N   |
| ATOM 58 | C   | GLU | 7 | 31.759 | 26.791 | 26.071 | 1.00 | 0.00 | C   | ATOM 128 | CA  | GLY | 15 | 24.767 | 30.035 | 25.457 | 1.00 | 0.00 | C   |
| ATOM 59 | O   | GLU | 7 | 30.680 | 26.654 | 26.730 | 1.00 | 0.00 | O   | ATOM 129 | C   | GLY | 15 | 24.173 | 31.476 | 25.662 | 1.00 | 0.00 | C   |
| ATOM 60 | N   | LEU | 8 | 32.760 | 25.962 | 26.276 | 1.00 | 0.00 | N   | ATOM 130 | O   | GLY | 15 | 23.902 | 31.906 | 26.797 | 1.00 | 0.00 | O   |
| ATOM 61 | CA  | LEU | 8 | 32.834 | 24.854 | 27.255 | 1.00 | 0.00 | C   | ATOM 131 | N   | ILE | 16 | 24.074 | 32.207 | 24.582 | 1.00 | 0.00 | N   |
| ATOM 62 | CB  | LEU | 8 | 33.878 | 23.833 | 26.748 | 1.00 | 0.00 | C   | ATOM 132 | CA  | ILE | 16 | 23.423 | 33.582 | 24.512 | 1.00 | 0.00 | C   |
| ATOM 63 | CG  | LEU | 8 | 33.968 | 22.503 | 27.516 | 1.00 | 0.00 | C   | ATOM 133 | CB  | ILE | 16 | 24.437 | 34.691 | 24.501 | 1.00 | 0.00 | C   |
| ATOM 64 | CD1 | LEU | 8 | 32.698 | 21.763 | 27.089 | 1.00 | 0.00 | C   | ATOM 134 | CG2 | ILE | 16 | 25.291 | 34.921 | 25.774 | 1.00 | 0.00 | C   |
| ATOM 65 | CD2 | LEU | 8 | 35.241 | 21.739 | 27.005 | 1.00 | 0.00 | C   | ATOM 135 | CG1 | ILE | 16 | 25.175 | 34.743 | 23.107 | 1.00 | 0.00 | C   |
| ATOM 66 | C   | LEU | 8 | 33.128 | 25.391 | 28.682 | 1.00 | 0.00 | C   | ATOM 136 | CD1 | ILE | 16 | 26.340 | 33.834 | 22.974 | 1.00 | 0.00 | C   |
| ATOM 67 | O   | LEU | 8 | 34.027 | 26.204 | 28.867 | 1.00 | 0.00 | O   | ATOM 137 | C   | ILE | 16 | 22.341 | 33.521 | 23.427 | 1.00 | 0.00 | C   |
| ATOM 68 | N   | TYR | 9 | 32.337 | 24.905 | 29.664 | 1.00 | 0.00 | N   | ATOM 138 | O   | ILE | 16 | 22.400 | 32.859 | 22.373 | 1.00 | 0.00 | O   |
| ATOM 69 | CA  | TYR | 9 | 32.409 | 25.298 | 31.083 | 1.00 | 0.00 | C   | ATOM 139 | N   | NHE | 17 | 21.219 | 34.128 | 23.683 | 1.00 | 0.00 | N   |
| ATOM 70 | CB  | TYR | 9 | 31.238 | 26.248 | 31.411 | 1.00 | 0.00 | C   | ATOM 140 | TER | NHE | 17 |        |        |        |      |      |     |

## H2 extended

|         |     |     |   |        |        |        |      |      |   |         |     |     |   |        |        |        |      |      |   |  |
|---------|-----|-----|---|--------|--------|--------|------|------|---|---------|-----|-----|---|--------|--------|--------|------|------|---|--|
| ATOM 1  | CH3 | ACE | 1 | 18.616 | 22.973 | 24.268 | 1.00 | 0.00 | C | ATOM 18 | C   | ALA | 4 | 19.708 | 17.388 | 17.776 | 1.00 | 0.00 | C |  |
| ATOM 2  | C   | ACE | 1 | 17.319 | 22.718 | 23.497 | 1.00 | 0.00 | C | ATOM 19 | O   | ALA | 4 | 20.542 | 16.977 | 18.623 | 1.00 | 0.00 | O |  |
| ATOM 3  | O   | ACE | 1 | 16.325 | 22.950 | 24.135 | 1.00 | 0.00 | O | ATOM 20 | N   | AIB | 5 | 19.591 | 16.819 | 16.543 | 1.00 | 0.00 | N |  |
| ATOM 4  | N   | ALA | 2 | 17.399 | 22.348 | 22.178 | 1.00 | 0.00 | N | ATOM 21 | CA  | AIB | 5 | 20.489 | 15.789 | 16.006 | 1.00 | 0.00 | C |  |
| ATOM 5  | CA  | ALA | 2 | 16.245 | 21.977 | 21.352 | 1.00 | 0.00 | C | ATOM 22 | CB1 | AIB | 5 | 19.981 | 15.663 | 14.550 | 1.00 | 0.00 | C |  |
| ATOM 6  | CB  | ALA | 2 | 16.376 | 22.769 | 20.037 | 1.00 | 0.00 | C | ATOM 23 | CB2 | AIB | 5 | 20.289 | 14.477 | 16.723 | 1.00 | 0.00 | C |  |
| ATOM 7  | C   | ALA | 2 | 15.956 | 20.463 | 21.131 | 1.00 | 0.00 | C | ATOM 24 | C   | AIB | 5 | 22.000 | 16.237 | 15.973 | 1.00 | 0.00 | C |  |
| ATOM 8  | O   | ALA | 2 | 15.127 | 20.176 | 20.242 | 1.00 | 0.00 | O | ATOM 25 | O   | AIB | 5 | 22.919 | 15.409 | 16.045 | 1.00 | 0.00 | O |  |
| ATOM 9  | N   | AIB | 3 | 16.717 | 19.554 | 21.753 | 1.00 | 0.00 | N | ATOM 26 | N   | AIB | 6 | 22.241 | 17.605 | 16.061 | 1.00 | 0.00 | N |  |
| ATOM 10 | CA  | AIB | 3 | 16.899 | 18.097 | 21.482 | 1.00 | 0.00 | C | ATOM 27 | CA  | AIB | 6 | 23.433 | 18.358 | 15.575 | 1.00 | 0.00 | C |  |
| ATOM 11 | CB1 | AIB | 3 | 15.605 | 17.462 | 21.843 | 1.00 | 0.00 | C | ATOM 28 | CB1 | AIB | 6 | 23.313 | 19.835 | 15.991 | 1.00 | 0.00 | C |  |
| ATOM 12 | CB2 | AIB | 3 | 18.007 | 17.657 | 22.449 | 1.00 | 0.00 | C | ATOM 29 | CB2 | AIB | 6 | 23.394 | 18.398 | 14.087 | 1.00 | 0.00 | C |  |
| ATOM 13 | C   | AIB | 3 | 17.317 | 17.864 | 19.972 | 1.00 | 0.00 | C | ATOM 30 | C   | AIB | 6 | 24.801 | 17.776 | 16.113 | 1.00 | 0.00 | C |  |
| ATOM 14 | O   | AIB | 3 | 16.905 | 16.856 | 19.354 | 1.00 | 0.00 | O | ATOM 31 | O   | AIB | 6 | 25.888 | 17.815 | 15.456 | 1.00 | 0.00 | O |  |
| ATOM 15 | N   | ALA | 4 | 18.206 | 18.694 | 19.391 | 1.00 | 0.00 | N | ATOM 32 | N   | NHE | 7 | 24.805 | 17.527 | 17.371 | 1.00 | 0.00 | N |  |
| ATOM 16 | CA  | ALA | 4 | 18.691 | 18.534 | 18.024 | 1.00 | 0.00 | C | TER 33  | NHE | 7   |   |        |        |        |      |      |   |  |
| ATOM 17 | CB  | ALA | 4 | 19.360 | 19.880 | 17.652 | 1.00 | 0.00 | C |         |     |     |   |        |        |        |      |      |   |  |

## H2 misfolded

|         |     |     |   |        |        |        |      |      |   |         |     |     |   |        |        |        |      |      |   |  |
|---------|-----|-----|---|--------|--------|--------|------|------|---|---------|-----|-----|---|--------|--------|--------|------|------|---|--|
| ATOM 1  | CH3 | ACE | 1 | 15.700 | 20.901 | 23.583 | 1.00 | 0.00 | C | ATOM 18 | C   | ALA | 4 | 21.504 | 18.050 | 14.289 | 1.00 | 0.00 | C |  |
| ATOM 2  | C   | ACE | 1 | 15.782 | 20.376 | 22.147 | 1.00 | 0.00 | C | ATOM 19 | O   | ALA | 4 | 21.114 | 17.551 | 13.237 | 1.00 | 0.00 | O |  |
| ATOM 3  | O   | ACE | 1 | 14.816 | 19.818 | 21.631 | 1.00 | 0.00 | O | ATOM 20 | N   | AIB | 5 | 21.794 | 17.325 | 15.372 | 1.00 | 0.00 | N |  |
| ATOM 4  | N   | ALA | 2 | 16.941 | 20.556 | 21.510 | 1.00 | 0.00 | N | ATOM 21 | CA  | AIB | 5 | 21.667 | 15.863 | 15.383 | 1.00 | 0.00 | C |  |
| ATOM 5  | CA  | ALA | 2 | 17.145 | 20.104 | 20.149 | 1.00 | 0.00 | C | ATOM 22 | CB1 | AIB | 5 | 22.653 | 15.337 | 16.437 | 1.00 | 0.00 | C |  |
| ATOM 6  | CB  | ALA | 2 | 16.156 | 20.768 | 19.196 | 1.00 | 0.00 | C | ATOM 23 | CB2 | AIB | 5 | 21.995 | 15.261 | 14.012 | 1.00 | 0.00 | C |  |
| ATOM 7  | C   | ALA | 2 | 18.549 | 20.437 | 19.667 | 1.00 | 0.00 | C | ATOM 24 | C   | AIB | 5 | 20.265 | 15.408 | 15.830 | 1.00 | 0.00 | C |  |
| ATOM 8  | O   | ALA | 2 | 19.343 | 21.015 | 20.405 | 1.00 | 0.00 | O | ATOM 25 | O   | AIB | 5 | 20.004 | 14.237 | 15.890 | 1.00 | 0.00 | O |  |
| ATOM 9  | N   | AIB | 3 | 18.856 | 20.067 | 18.421 | 1.00 | 0.00 | N | ATOM 26 | N   | AIB | 6 | 19.392 | 16.371 | 16.135 | 1.00 | 0.00 | N |  |
| ATOM 10 | CA  | AIB | 3 | 20.177 | 20.329 | 17.837 | 1.00 | 0.00 | C | ATOM 27 | CA  | AIB | 6 | 18.027 | 16.068 | 16.575 | 1.00 | 0.00 | C |  |
| ATOM 11 | CB1 | AIB | 3 | 21.195 | 19.529 | 18.664 | 1.00 | 0.00 | C | ATOM 28 | CB1 | AIB | 6 | 18.143 | 15.314 | 17.908 | 1.00 | 0.00 | C |  |
| ATOM 12 | CB2 | AIB | 3 | 20.522 | 21.820 | 17.879 | 1.00 | 0.00 | C | ATOM 29 | CB2 | AIB | 6 | 17.285 | 15.206 | 15.548 | 1.00 | 0.00 | C |  |
| ATOM 13 | C   | AIB | 3 | 20.284 | 19.808 | 16.392 | 1.00 | 0.00 | C | ATOM 30 | C   | AIB | 6 | 17.215 | 17.345 | 16.866 | 1.00 | 0.00 | C |  |
| ATOM 14 | O   | AIB | 3 | 19.346 | 19.263 | 15.879 | 1.00 | 0.00 | O | ATOM 31 | O   | AIB | 6 | 17.723 | 18.425 | 16.723 | 1.00 | 0.00 | O |  |
| ATOM 15 | N   | ALA | 4 | 21.451 | 20.000 | 15.773 | 1.00 | 0.00 | N | ATOM 32 | N   | NHE | 7 | 15.956 | 17.174 | 17.274 | 1.00 | 0.00 | N |  |
| ATOM 16 | CA  | ALA | 4 | 21.679 | 19.556 | 14.412 | 1.00 | 0.00 | C | TER 33  | NHE | 7   |   |        |        |        |      |      |   |  |
| ATOM 17 | CB  | ALA | 4 | 23.091 | 19.900 | 13.952 | 1.00 | 0.00 | C |         |     |     |   |        |        |        |      |      |   |  |

## B1 extended

|                   |        |        |        |      |      |     |                     |        |        |        |      |      |     |
|-------------------|--------|--------|--------|------|------|-----|---------------------|--------|--------|--------|------|------|-----|
| ATOM 1 CH3 ACE 1  | 19.051 | 33.832 | 35.759 | 1.00 | 0.00 | C   | ATOM 69 C ALA 9     | 27.813 | 27.627 | 21.049 | 1.00 | 0.00 | C   |
| ATOM 2 C ACE 1    | 18.351 | 33.143 | 34.583 | 1.00 | 0.00 | C   | ATOM 70 O ALA 9     | 28.015 | 27.005 | 20.004 | 1.00 | 0.00 | O   |
| ATOM 3 O ACE 1    | 17.199 | 33.400 | 34.331 | 1.00 | 0.00 | O   | ATOM 71 N THR 10    | 28.785 | 27.822 | 21.929 | 1.00 | 0.00 | N   |
| ATOM 4 N GLY 2    | 19.106 | 32.321 | 33.780 | 1.00 | 0.00 | N   | ATOM 72 CA THR 10   | 30.201 | 27.331 | 21.932 | 1.00 | 0.00 | C   |
| ATOM 5 CA GLY 2   | 18.554 | 31.853 | 32.435 | 1.00 | 0.00 | C   | ATOM 73 CB THR 10   | 31.107 | 28.545 | 22.201 | 1.00 | 0.00 | C   |
| ATOM 6 C GLY 2    | 19.280 | 30.641 | 31.839 | 1.00 | 0.00 | C   | ATOM 74 CG2 THR 10  | 31.067 | 29.466 | 20.995 | 1.00 | 0.00 | C   |
| ATOM 7 O GLY 2    | 20.329 | 30.069 | 32.455 | 1.00 | 0.00 | O   | ATOM 75 OGI THR 10  | 30.744 | 29.178 | 23.434 | 1.00 | 0.00 | O   |
| ATOM 8 N GLU 3    | 18.690 | 30.057 | 30.782 | 1.00 | 0.00 | N   | ATOM 76 C THR 10    | 30.575 | 26.197 | 22.908 | 1.00 | 0.00 | C   |
| ATOM 9 CA GLU 3   | 19.126 | 28.740 | 30.137 | 1.00 | 0.00 | C   | ATOM 77 O THR 10    | 31.581 | 25.536 | 22.765 | 1.00 | 0.00 | O   |
| ATOM 10 CB GLU 3  | 18.047 | 28.303 | 29.011 | 1.00 | 0.00 | C   | ATOM 78 N LYS 11    | 29.803 | 26.124 | 23.991 | 1.00 | 0.00 | N   |
| ATOM 11 CG GLU 3  | 18.009 | 26.878 | 28.481 | 1.00 | 0.00 | C   | ATOM 79 CA LYS 11   | 29.803 | 25.082 | 25.051 | 1.00 | 0.00 | C   |
| ATOM 12 CD GLU 3  | 17.686 | 25.810 | 29.566 | 1.00 | 0.00 | C   | ATOM 80 CB LYS 11   | 29.587 | 25.679 | 26.406 | 1.00 | 0.00 | C   |
| ATOM 13 OE1 GLU 3 | 16.590 | 25.685 | 30.118 | 1.00 | 0.00 | O   | ATOM 81 CG LYS 11   | 28.132 | 26.163 | 26.713 | 1.00 | 0.00 | C   |
| ATOM 14 OE2 GLU 3 | 18.584 | 25.028 | 29.955 | 1.00 | 0.00 | O1- | ATOM 82 CD LYS 11   | 28.163 | 27.048 | 28.012 | 1.00 | 0.00 | C   |
| ATOM 15 C GLU 3   | 20.497 | 28.844 | 29.597 | 1.00 | 0.00 | C   | ATOM 83 CE LYS 11   | 27.899 | 26.242 | 29.290 | 1.00 | 0.00 | C   |
| ATOM 16 O GLU 3   | 21.281 | 27.899 | 29.667 | 1.00 | 0.00 | O   | ATOM 84 NZ LYS 11   | 28.258 | 27.060 | 30.484 | 1.00 | 0.00 | N1+ |
| ATOM 17 N TRP 4   | 20.946 | 30.045 | 29.171 | 1.00 | 0.00 | N   | ATOM 85 C LYS 11    | 28.894 | 23.843 | 26.955 | 1.00 | 0.00 | C   |
| ATOM 18 CA TRP 4  | 22.256 | 30.415 | 28.703 | 1.00 | 0.00 | C   | ATOM 86 O LYS 11    | 29.318 | 22.686 | 24.988 | 1.00 | 0.00 | O   |
| ATOM 19 CB TRP 4  | 22.213 | 31.929 | 28.355 | 1.00 | 0.00 | C   | ATOM 87 N THR 12    | 27.840 | 24.038 | 23.860 | 1.00 | 0.00 | N   |
| ATOM 20 CG TRP 4  | 22.087 | 33.014 | 29.361 | 1.00 | 0.00 | C   | ATOM 88 CA THR 12   | 26.937 | 22.902 | 23.511 | 1.00 | 0.00 | C   |
| ATOM 21 CD1 TRP 4 | 20.943 | 33.623 | 29.746 | 1.00 | 0.00 | C   | ATOM 89 CB THR 12   | 25.375 | 23.288 | 23.476 | 1.00 | 0.00 | C   |
| ATOM 22 NE1 TRP 4 | 21.214 | 34.587 | 30.722 | 1.00 | 0.00 | N   | ATOM 90 CG2 THR 12  | 24.509 | 22.023 | 23.483 | 1.00 | 0.00 | C   |
| ATOM 23 CE2 TRP 4 | 22.585 | 34.527 | 31.053 | 1.00 | 0.00 | C   | ATOM 91 OGI THR 12  | 24.997 | 24.039 | 24.634 | 1.00 | 0.00 | O   |
| ATOM 24 CZ2 TRP 4 | 23.323 | 35.266 | 31.971 | 1.00 | 0.00 | C   | ATOM 92 C THR 12    | 27.465 | 22.206 | 22.275 | 1.00 | 0.00 | C   |
| ATOM 25 CH2 TRP 4 | 24.682 | 34.964 | 32.135 | 1.00 | 0.00 | C   | ATOM 93 O THR 12    | 27.541 | 20.981 | 22.228 | 1.00 | 0.00 | O   |
| ATOM 26 CZ3 TRP 4 | 25.247 | 34.001 | 31.319 | 1.00 | 0.00 | C   | ATOM 94 N PHE 13    | 27.825 | 23.003 | 21.238 | 1.00 | 0.00 | N   |
| ATOM 27 CE3 TRP 4 | 24.509 | 33.342 | 30.352 | 1.00 | 0.00 | C   | ATOM 95 CA PHE 13   | 28.243 | 22.461 | 19.934 | 1.00 | 0.00 | C   |
| ATOM 28 CD2 TRP 4 | 23.163 | 33.567 | 30.154 | 1.00 | 0.00 | C   | ATOM 96 CB PHE 13   | 27.479 | 23.052 | 18.752 | 1.00 | 0.00 | C   |
| ATOM 29 C TRP 4   | 23.425 | 30.165 | 29.661 | 1.00 | 0.00 | C   | ATOM 97 CG PHE 13   | 25.943 | 23.070 | 18.974 | 1.00 | 0.00 | C   |
| ATOM 30 O TRP 4   | 24.549 | 30.036 | 29.213 | 1.00 | 0.00 | O   | ATOM 98 CD1 PHE 13  | 25.173 | 21.903 | 18.967 | 1.00 | 0.00 | C   |
| ATOM 31 N THR 5   | 23.125 | 30.021 | 30.981 | 1.00 | 0.00 | N   | ATOM 99 CE1 PHE 13  | 23.816 | 21.888 | 19.347 | 1.00 | 0.00 | C   |
| ATOM 32 CA THR 5  | 24.124 | 29.538 | 31.953 | 1.00 | 0.00 | C   | ATOM 100 CZ PHE 13  | 23.258 | 23.056 | 19.807 | 1.00 | 0.00 | C   |
| ATOM 33 CB THR 5  | 23.654 | 29.541 | 33.388 | 1.00 | 0.00 | C   | ATOM 101 CE2 PHE 13 | 24.030 | 24.246 | 19.861 | 1.00 | 0.00 | C   |
| ATOM 34 CG2 THR 5 | 23.335 | 30.915 | 33.938 | 1.00 | 0.00 | C   | ATOM 102 CD2 PHE 13 | 25.341 | 24.274 | 19.386 | 1.00 | 0.00 | C   |
| ATOM 35 OGI THR 5 | 22.552 | 28.629 | 33.555 | 1.00 | 0.00 | O   | ATOM 103 C PHE 13   | 29.733 | 22.448 | 19.943 | 1.00 | 0.00 | C   |
| ATOM 36 C THR 5   | 24.614 | 28.160 | 31.639 | 1.00 | 0.00 | C   | ATOM 104 O PHE 13   | 30.287 | 22.931 | 18.965 | 1.00 | 0.00 | O   |
| ATOM 37 O THR 5   | 25.730 | 27.827 | 31.944 | 1.00 | 0.00 | O   | ATOM 105 N THR 14   | 30.352 | 21.774 | 20.881 | 1.00 | 0.00 | N   |
| ATOM 38 N TYR 6   | 23.740 | 27.260 | 31.121 | 1.00 | 0.00 | N   | ATOM 106 CA THR 14  | 31.807 | 21.539 | 20.841 | 1.00 | 0.00 | C   |
| ATOM 39 CA TYR 6  | 23.954 | 25.794 | 30.892 | 1.00 | 0.00 | C   | ATOM 107 CB THR 14  | 32.149 | 20.641 | 22.042 | 1.00 | 0.00 | C   |
| ATOM 40 CB TYR 6  | 22.707 | 25.285 | 31.624 | 1.00 | 0.00 | C   | ATOM 108 CG2 THR 14 | 32.091 | 21.198 | 23.433 | 1.00 | 0.00 | C   |
| ATOM 41 CG TYR 6  | 22.579 | 23.755 | 31.605 | 1.00 | 0.00 | C   | ATOM 109 OGI THR 14 | 31.245 | 19.592 | 22.058 | 1.00 | 0.00 | O   |
| ATOM 42 CD1 TYR 6 | 23.684 | 23.029 | 32.097 | 1.00 | 0.00 | C   | ATOM 110 C THR 14   | 32.357 | 20.989 | 19.526 | 1.00 | 0.00 | C   |
| ATOM 43 CE1 TYR 6 | 23.689 | 21.585 | 32.093 | 1.00 | 0.00 | C   | ATOM 111 O THR 14   | 33.535 | 21.376 | 19.167 | 1.00 | 0.00 | O   |
| ATOM 44 CZ TYR 6  | 22.523 | 20.909 | 31.654 | 1.00 | 0.00 | C   | ATOM 112 N VAL 15   | 31.533 | 20.290 | 18.722 | 1.00 | 0.00 | N   |
| ATOM 45 OH TYR 6  | 22.468 | 19.548 | 31.777 | 1.00 | 0.00 | O   | ATOM 113 CA VAL 15  | 31.728 | 19.848 | 17.317 | 1.00 | 0.00 | C   |
| ATOM 46 CE2 TYR 6 | 21.481 | 21.605 | 30.960 | 1.00 | 0.00 | C   | ATOM 114 CB VAL 15  | 30.522 | 19.069 | 16.832 | 1.00 | 0.00 | C   |
| ATOM 47 CD2 TYR 6 | 21.520 | 23.022 | 30.975 | 1.00 | 0.00 | C   | ATOM 115 CG1 VAL 15 | 30.436 | 17.686 | 17.471 | 1.00 | 0.00 | C   |
| ATOM 48 C TYR 6   | 24.133 | 25.466 | 29.432 | 1.00 | 0.00 | C   | ATOM 116 CG2 VAL 15 | 29.121 | 19.824 | 16.926 | 1.00 | 0.00 | C   |
| ATOM 49 O TYR 6   | 24.879 | 24.521 | 29.187 | 1.00 | 0.00 | O   | ATOM 117 C VAL 15   | 32.033 | 20.920 | 16.276 | 1.00 | 0.00 | C   |
| ATOM 50 N ASP 7   | 23.417 | 26.167 | 28.598 | 1.00 | 0.00 | N   | ATOM 118 O VAL 15   | 32.582 | 20.641 | 15.194 | 1.00 | 0.00 | O   |
| ATOM 51 CA ASP 7  | 23.338 | 25.843 | 27.163 | 1.00 | 0.00 | C   | ATOM 119 N THR 16   | 31.735 | 22.215 | 16.615 | 1.00 | 0.00 | N   |
| ATOM 52 CB ASP 7  | 21.940 | 25.171 | 26.854 | 1.00 | 0.00 | C   | ATOM 120 CA THR 16  | 32.098 | 23.411 | 15.890 | 1.00 | 0.00 | C   |
| ATOM 53 CG ASP 7  | 21.548 | 25.223 | 25.399 | 1.00 | 0.00 | C   | ATOM 121 CB THR 16  | 31.202 | 24.626 | 16.233 | 1.00 | 0.00 | C   |
| ATOM 54 OD1 ASP 7 | 22.373 | 25.078 | 24.471 | 1.00 | 0.00 | O   | ATOM 122 CG2 THR 16 | 29.748 | 24.342 | 15.915 | 1.00 | 0.00 | C   |
| ATOM 55 OD2 ASP 7 | 20.374 | 25.349 | 25.132 | 1.00 | 0.00 | O1- | ATOM 123 OGI THR 16 | 31.298 | 24.973 | 17.570 | 1.00 | 0.00 | O   |
| ATOM 56 C ASP 7   | 23.529 | 27.094 | 26.312 | 1.00 | 0.00 | C   | ATOM 124 C THR 16   | 33.628 | 23.793 | 15.976 | 1.00 | 0.00 | C   |
| ATOM 57 O ASP 7   | 22.675 | 28.010 | 26.238 | 1.00 | 0.00 | O   | ATOM 125 O THR 16   | 34.049 | 24.807 | 15.396 | 1.00 | 0.00 | O   |
| ATOM 58 N ASP 8   | 24.683 | 27.127 | 25.632 | 1.00 | 0.00 | N   | ATOM 126 N GLU 17   | 34.410 | 22.994 | 16.738 | 1.00 | 0.00 | N   |
| ATOM 59 CA ASP 8  | 25.117 | 28.249 | 24.756 | 1.00 | 0.00 | C   | ATOM 127 CA GLU 17  | 35.850 | 23.317 | 17.023 | 1.00 | 0.00 | C   |
| ATOM 60 CB ASP 8  | 25.875 | 29.350 | 25.614 | 1.00 | 0.00 | C   | ATOM 128 CB GLU 17  | 35.850 | 23.966 | 18.427 | 1.00 | 0.00 | C   |
| ATOM 61 CG ASP 8  | 26.075 | 30.700 | 24.967 | 1.00 | 0.00 | C   | ATOM 129 CG GLU 17  | 37.295 | 24.559 | 18.699 | 1.00 | 0.00 | C   |
| ATOM 62 OD1 ASP 8 | 27.201 | 31.229 | 24.868 | 1.00 | 0.00 | O   | ATOM 130 CD GLU 17  | 37.548 | 24.750 | 20.196 | 1.00 | 0.00 | C   |
| ATOM 63 OD2 ASP 8 | 25.100 | 31.257 | 24.394 | 1.00 | 0.00 | O1- | ATOM 131 OE1 GLU 17 | 36.652 | 25.322 | 20.914 | 1.00 | 0.00 | O   |
| ATOM 64 C ASP 8   | 26.002 | 27.814 | 23.563 | 1.00 | 0.00 | C   | ATOM 132 OE2 GLU 17 | 38.718 | 24.458 | 20.533 | 1.00 | 0.00 | O1- |
| ATOM 65 O ASP 8   | 26.288 | 26.603 | 23.390 | 1.00 | 0.00 | O   | ATOM 133 C GLU 17   | 36.611 | 21.936 | 16.972 | 1.00 | 0.00 | C   |
| ATOM 66 N ALA 9   | 25.997 | 28.614 | 22.567 | 1.00 | 0.00 | N   | ATOM 134 O GLU 17   | 37.625 | 21.663 | 17.595 | 1.00 | 0.00 | O   |
| ATOM 67 CA ALA 9  | 26.384 | 28.249 | 21.202 | 1.00 | 0.00 | C   | ATOM 135 N NHE 18   | 36.172 | 21.042 | 16.100 | 1.00 | 0.00 | N   |
| ATOM 68 CB ALA 9  | 26.161 | 29.489 | 20.276 | 1.00 | 0.00 | C   | TER 136 NHE 18      |        |        |        |      |      |     |

## B1 misfolded

|                                                      |                                                        |
|------------------------------------------------------|--------------------------------------------------------|
| ATOM 1 CH3 ACE 1 30.243 19.667 35.960 1.00 0.00 C    | ATOM 69 C ALA 9 22.900 26.144 24.933 1.00 0.00 C       |
| ATOM 2 C ACE 1 30.138 21.124 35.507 1.00 0.00 C      | ATOM 70 O ALA 9 21.997 26.709 24.318 1.00 0.00 O       |
| ATOM 3 O ACE 1 30.051 22.030 36.334 1.00 0.00 O      | ATOM 71 N THR 10 24.096 25.891 24.395 1.00 0.00 N      |
| ATOM 4 N GLY 2 30.148 21.343 34.212 1.00 0.00 N      | ATOM 72 CA THR 10 24.418 26.269 23.034 1.00 0.00 C     |
| ATOM 5 CA GLY 2 30.055 22.684 33.670 1.00 0.00 C     | ATOM 73 CB THR 10 25.843 25.864 22.674 1.00 0.00 C     |
| ATOM 6 C GLY 2 30.090 22.645 32.149 1.00 0.00 C      | ATOM 74 CG2 THR 10 26.821 26.557 23.617 1.00 0.00 C    |
| ATOM 7 O GLY 2 29.300 23.317 31.490 1.00 0.00 O      | ATOM 75 OGI THR 10 25.982 24.446 22.801 1.00 0.00 O    |
| ATOM 8 N GLU 3 31.010 21.854 31.592 1.00 0.00 N      | ATOM 76 C THR 10 23.479 25.596 22.042 1.00 0.00 C      |
| ATOM 9 CA GLU 3 31.144 21.730 30.155 1.00 0.00 C     | ATOM 77 O THR 10 22.982 26.239 21.119 1.00 0.00 O      |
| ATOM 10 CB GLU 3 32.268 20.765 29.789 1.00 0.00 C    | ATOM 78 N LYS 11 23.238 24.298 22.233 1.00 0.00 N      |
| ATOM 11 CG GLU 3 32.375 20.664 28.287 1.00 0.00 C    | ATOM 79 CA LYS 11 22.362 23.544 21.358 1.00 0.00 C     |
| ATOM 12 CD GLU 3 33.500 19.699 27.921 1.00 0.00 C    | ATOM 80 CB LYS 11 22.263 22.089 21.802 1.00 0.00 C     |
| ATOM 13 OE1 GLU 3 33.195 18.483 27.789 1.00 0.00 O   | ATOM 81 CG LYS 11 21.336 21.331 22.058 1.00 0.00 C     |
| ATOM 14 OE2 GLU 3 34.653 20.186 27.778 1.00 0.00 O1- | ATOM 82 CD LYS 11 21.236 19.876 21.302 1.00 0.00 C     |
| ATOM 15 C GLU 3 29.859 21.207 29.528 1.00 0.00 C     | ATOM 83 CE LYS 11 20.308 19.119 20.357 1.00 0.00 C     |
| ATOM 16 O GLU 3 29.406 21.726 28.510 1.00 0.00 O     | ATOM 84 NZ LYS 11 20.212 17.716 20.785 1.00 0.00 NI+   |
| ATOM 17 N TRP 4 29.273 20.175 30.139 1.00 0.00 N     | ATOM 85 C LYS 11 20.956 24.126 21.355 1.00 0.00 C      |
| ATOM 18 CA TRP 4 28.047 19.586 29.640 1.00 0.00 C    | ATOM 86 O LYS 11 20.349 24.284 20.299 1.00 0.00 O      |
| ATOM 19 CB TRP 4 27.596 18.428 30.523 1.00 0.00 C    | ATOM 87 N THR 12 20.440 24.447 22.543 1.00 0.00 N      |
| ATOM 20 CG TRP 4 26.321 17.748 30.082 1.00 0.00 C    | ATOM 88 CA THR 12 19.112 25.010 22.674 1.00 0.00 C     |
| ATOM 21 CD1 TRP 4 25.713 16.712 30.676 1.00 0.00 C   | ATOM 89 CB THR 12 18.771 25.281 24.136 1.00 0.00 C     |
| ATOM 22 NE1 TRP 4 24.545 16.414 29.904 1.00 0.00 N   | ATOM 90 CG2 THR 12 18.828 23.975 24.922 1.00 0.00 C    |
| ATOM 23 CE2 TRP 4 24.477 17.249 28.896 1.00 0.00 C   | ATOM 91 OGI THR 12 19.715 26.206 24.681 1.00 0.00 O    |
| ATOM 24 CZ2 TRP 4 23.500 17.313 27.895 1.00 0.00 C   | ATOM 92 C THR 12 18.997 26.325 21.918 1.00 0.00 C      |
| ATOM 25 CH2 TRP 4 23.673 18.305 26.938 1.00 0.00 C   | ATOM 93 O THR 12 18.018 26.555 21.211 1.00 0.00 O      |
| ATOM 26 CZ3 TRP 4 24.728 19.144 26.989 1.00 0.00 C   | ATOM 94 N PHE 13 20.002 27.191 22.068 1.00 0.00 N      |
| ATOM 27 CE3 TRP 4 25.701 19.061 28.007 1.00 0.00 C   | ATOM 95 CA PHE 13 20.011 28.478 21.401 1.00 0.00 C     |
| ATOM 28 CD2 TRP 4 25.526 18.062 28.972 1.00 0.00 C   | ATOM 96 CB PHE 13 21.271 29.265 21.745 1.00 0.00 C     |
| ATOM 29 C TRP 4 26.921 20.611 29.606 1.00 0.00 C     | ATOM 97 CG PHE 13 21.371 30.624 21.095 1.00 0.00 C     |
| ATOM 30 O TRP 4 26.188 20.699 28.624 1.00 0.00 O     | ATOM 98 CD1 PHE 13 22.485 31.436 21.338 1.00 0.00 C    |
| ATOM 31 N THR 5 26.787 21.386 30.684 1.00 0.00 N     | ATOM 99 CE1 PHE 13 22.577 32.696 20.735 1.00 0.00 C    |
| ATOM 32 CA THR 5 25.755 22.399 30.774 1.00 0.00 C    | ATOM 100 CZ PHE 13 21.556 33.144 19.889 1.00 0.00 C    |
| ATOM 33 CB THR 5 25.826 23.138 32.107 1.00 0.00 C    | ATOM 101 CE2 PHE 13 20.442 32.332 19.645 1.00 0.00 C   |
| ATOM 34 CG2 THR 5 25.636 22.147 33.249 1.00 0.00 C   | ATOM 102 CD2 PHE 13 20.349 31.073 20.248 1.00 0.00 C   |
| ATOM 35 OGI THR 5 27.101 23.773 32.232 1.00 0.00 O   | ATOM 103 C PHE 13 19.964 28.311 19.889 1.00 0.00 C     |
| ATOM 36 C THR 5 25.899 23.429 29.663 1.00 0.00 C     | ATOM 104 O PHE 13 19.210 29.003 19.208 1.00 0.00 O     |
| ATOM 37 O THR 5 24.916 23.805 29.028 1.00 0.00 O     | ATOM 105 N THR 14 20.775 27.388 19.364 1.00 0.00 N     |
| ATOM 38 N TYR 6 27.131 23.887 29.429 1.00 0.00 N     | ATOM 106 CA THR 14 20.823 27.134 17.938 1.00 0.00 C    |
| ATOM 39 CA TYR 6 27.400 24.869 28.397 1.00 0.00 C    | ATOM 107 CB THR 14 21.828 26.036 17.611 1.00 0.00 C    |
| ATOM 40 CB TYR 6 28.884 25.215 28.343 1.00 0.00 C    | ATOM 108 CG2 THR 14 23.216 26.460 18.078 1.00 0.00 C   |
| ATOM 41 CG TYR 6 29.122 26.239 27.259 1.00 0.00 C    | ATOM 109 OGI THR 14 21.448 24.829 18.277 1.00 0.00 O   |
| ATOM 42 CD1 TYR 6 30.417 26.715 27.017 1.00 0.00 C   | ATOM 110 C THR 14 19.464 26.694 17.413 1.00 0.00 C     |
| ATOM 43 CE1 TYR 6 30.637 27.665 26.012 1.00 0.00 C   | ATOM 111 O THR 14 19.011 27.171 16.375 1.00 0.00 O     |
| ATOM 44 CZ TYR 6 29.564 28.138 25.249 1.00 0.00 C    | ATOM 112 N VAL 15 18.812 25.779 18.136 1.00 0.00 N     |
| ATOM 45 OH TYR 6 29.779 29.059 24.272 1.00 0.00 O    | ATOM 113 CA VAL 15 17.510 25.279 17.742 1.00 0.00 C    |
| ATOM 46 CE2 TYR 6 28.270 27.661 25.490 1.00 0.00 C   | ATOM 114 CB VAL 15 16.995 24.248 18.740 1.00 0.00 C    |
| ATOM 47 CD2 TYR 6 28.049 26.712 26.494 1.00 0.00 C   | ATOM 115 CG1 VAL 15 16.874 24.889 20.117 1.00 0.00 C   |
| ATOM 48 C TYR 6 26.993 24.350 27.026 1.00 0.00 C     | ATOM 116 CG2 VAL 15 15.626 23.746 18.292 1.00 0.00 C   |
| ATOM 49 O TYR 6 26.367 25.066 26.248 1.00 0.00 O     | ATOM 117 C VAL 15 16.490 26.405 17.667 1.00 0.00 C     |
| ATOM 50 N ASP 7 27.350 23.097 26.731 1.00 0.00 N     | ATOM 118 O VAL 15 15.719 26.486 16.713 1.00 0.00 O     |
| ATOM 51 CA ASP 7 27.021 22.487 25.458 1.00 0.00 C    | ATOM 119 N THR 16 16.486 27.277 18.679 1.00 0.00 N     |
| ATOM 52 CB ASP 7 27.546 21.058 25.383 1.00 0.00 C    | ATOM 120 CA THR 16 15.562 28.392 18.725 1.00 0.00 C    |
| ATOM 53 CG ASP 7 27.180 20.452 24.030 1.00 0.00 C    | ATOM 121 CB THR 16 15.772 29.227 19.984 1.00 0.00 C    |
| ATOM 54 OD1 ASP 7 28.007 20.599 23.091 1.00 0.00 O   | ATOM 122 CG2 THR 16 15.545 28.356 21.215 1.00 0.00 C   |
| ATOM 55 OD2 ASP 7 26.078 19.847 23.949 1.00 0.00 O1- | ATOM 123 OGI THR 16 17.107 29.737 20.001 1.00 0.00 O   |
| ATOM 56 C ASP 7 25.515 22.442 25.245 1.00 0.00 C     | ATOM 124 C THR 16 15.749 29.308 17.523 1.00 0.00 C     |
| ATOM 57 O ASP 7 25.028 22.766 24.164 1.00 0.00 O     | ATOM 125 O THR 16 14.775 29.727 16.901 1.00 0.00 O     |
| ATOM 58 N ASP 8 24.777 22.038 26.281 1.00 0.00 N     | ATOM 126 N GLU 17 17.006 29.618 17.199 1.00 0.00 N     |
| ATOM 59 CA ASP 8 23.332 21.951 26.204 1.00 0.00 C    | ATOM 127 CA GLU 17 17.316 30.481 16.076 1.00 0.00 C    |
| ATOM 60 CB ASP 8 22.740 21.464 27.522 1.00 0.00 C    | ATOM 128 CB GLU 17 18.822 30.670 15.929 1.00 0.00 C    |
| ATOM 61 CG ASP 8 21.220 21.387 27.400 1.00 0.00 C    | ATOM 129 CG GLU 17 19.103 31.573 14.752 1.00 0.00 C    |
| ATOM 62 OD1 ASP 8 20.729 20.298 26.999 1.00 0.00 O   | ATOM 130 CD GLU 17 20.611 31.762 14.604 1.00 0.00 C    |
| ATOM 63 OD2 ASP 8 20.564 22.417 27.710 1.00 0.00 O1- | ATOM 131 OE1 GLU 17 21.226 30.940 13.874 1.00 0.00 O   |
| ATOM 64 C ASP 8 22.717 23.309 25.892 1.00 0.00 C     | ATOM 132 OE2 GLU 17 21.134 32.728 15.222 1.00 0.00 O1- |
| ATOM 65 O ASP 8 21.831 23.412 25.049 1.00 0.00 O     | ATOM 133 C GLU 17 16.792 29.895 14.774 1.00 0.00 C     |
| ATOM 66 N ALA 9 23.193 24.351 26.577 1.00 0.00 N     | ATOM 134 O GLU 17 16.192 28.822 14.769 1.00 0.00 O     |
| ATOM 67 CA ALA 9 22.691 25.695 26.371 1.00 0.00 C    | ATOM 135 N NHE 18 17.015 30.596 13.663 1.00 0.00 N     |
| ATOM 68 CB ALA 9 23.404 26.692 27.279 1.00 0.00 C    | TER 136 NHE 18                                         |

## B2 extended

|                                                      |                                                       |
|------------------------------------------------------|-------------------------------------------------------|
| ATOM 1 CH3 ACE 1 28.608 21.610 32.298 1.00 0.00 C    | ATOM 61 O ASN 7 18.395 20.668 24.035 1.00 0.00 O      |
| ATOM 2 C ACE 1 29.240 22.384 31.135 1.00 0.00 C      | ATOM 62 N GLY 8 18.829 21.100 21.877 1.00 0.00 N      |
| ATOM 3 O ACE 1 29.406 23.622 31.282 1.00 0.00 O      | ATOM 63 CA GLY 8 17.458 21.148 21.365 1.00 0.00 C     |
| ATOM 4 N SER 2 29.453 21.666 30.018 1.00 0.00 N      | ATOM 64 C GLY 8 16.554 22.344 21.709 1.00 0.00 C      |
| ATOM 5 CA SER 2 29.732 22.254 28.643 1.00 0.00 C     | ATOM 65 O GLY 8 15.437 22.495 21.231 1.00 0.00 O      |
| ATOM 6 CB SER 2 30.900 21.463 28.035 1.00 0.00 C     | ATOM 66 N LYS 9 17.025 23.197 22.626 1.00 0.00 N      |
| ATOM 7 OG SER 2 31.572 22.388 27.260 1.00 0.00 O     | ATOM 67 CA LYS 9 16.309 24.393 23.063 1.00 0.00 C     |
| ATOM 8 C SER 2 28.518 22.440 27.776 1.00 0.00 C      | ATOM 68 CB LYS 9 16.810 24.874 24.500 1.00 0.00 C     |
| ATOM 9 O SER 2 27.356 22.034 28.140 1.00 0.00 O      | ATOM 69 CG LYS 9 16.675 23.793 25.562 1.00 0.00 C     |
| ATOM 10 N TRP 3 28.656 23.153 26.639 1.00 0.00 N     | ATOM 70 CD LYS 9 15.270 23.199 25.749 1.00 0.00 C     |
| ATOM 11 CA TRP 3 27.523 23.593 25.762 1.00 0.00 C    | ATOM 71 CE LYS 9 15.353 22.212 26.938 1.00 0.00 C     |
| ATOM 12 CB TRP 3 28.053 24.667 24.898 1.00 0.00 C    | ATOM 72 NZ LYS 9 13.964 21.717 27.189 1.00 0.00 N1+   |
| ATOM 13 CG TRP 3 28.394 25.978 25.633 1.00 0.00 C    | ATOM 73 C LYS 9 16.151 25.582 22.086 1.00 0.00 C      |
| ATOM 14 CD1 TRP 3 29.605 26.355 26.004 1.00 0.00 C   | ATOM 74 O LYS 9 15.306 26.417 22.176 1.00 0.00 O      |
| ATOM 15 NE1 TRP 3 29.532 27.360 26.916 1.00 0.00 N   | ATOM 75 N TRP 10 16.999 25.527 21.092 1.00 0.00 N     |
| ATOM 16 CE2 TRP 3 28.214 27.723 27.232 1.00 0.00 C   | ATOM 76 CA TRP 10 17.321 26.553 20.122 1.00 0.00 C    |
| ATOM 17 CZ2 TRP 3 27.706 28.702 28.108 1.00 0.00 C   | ATOM 77 CB TRP 10 18.784 27.127 20.394 1.00 0.00 C    |
| ATOM 18 CH2 TRP 3 26.333 28.774 28.260 1.00 0.00 C   | ATOM 78 CG TRP 10 18.952 27.885 21.681 1.00 0.00 C    |
| ATOM 19 CZ3 TRP 3 25.473 27.875 27.575 1.00 0.00 C   | ATOM 79 CD1 TRP 10 19.549 27.338 22.762 1.00 0.00 C   |
| ATOM 20 CE3 TRP 3 26.047 26.953 26.616 1.00 0.00 C   | ATOM 80 NE1 TRP 10 19.468 28.206 23.878 1.00 0.00 N   |
| ATOM 21 CD2 TRP 3 27.409 26.803 26.474 1.00 0.00 C   | ATOM 81 CE2 TRP 10 18.893 29.356 23.506 1.00 0.00 C   |
| ATOM 22 C TRP 3 26.834 22.512 25.015 1.00 0.00 C     | ATOM 82 CZ2 TRP 10 18.580 30.519 24.245 1.00 0.00 C   |
| ATOM 23 O TRP 3 25.887 22.712 24.321 1.00 0.00 O     | ATOM 83 CH2 TRP 10 17.937 31.642 23.600 1.00 0.00 C   |
| ATOM 24 N THR 4 27.301 21.234 25.063 1.00 0.00 N     | ATOM 84 CZ3 TRP 10 17.394 31.392 22.316 1.00 0.00 C   |
| ATOM 25 CA THR 4 26.759 19.943 24.464 1.00 0.00 C    | ATOM 85 CE3 TRP 10 17.729 30.261 21.607 1.00 0.00 C   |
| ATOM 26 CB THR 4 27.796 18.821 24.565 1.00 0.00 C    | ATOM 86 CD2 TRP 10 18.506 29.187 22.133 1.00 0.00 C   |
| ATOM 27 CG2 THR 4 28.595 18.590 23.290 1.00 0.00 C   | ATOM 87 C TRP 10 17.406 25.945 18.686 1.00 0.00 C     |
| ATOM 28 OG1 THR 4 28.736 19.049 25.651 1.00 0.00 O   | ATOM 88 O TRP 10 17.922 24.824 18.582 1.00 0.00 O     |
| ATOM 29 C THR 4 25.417 19.451 25.088 1.00 0.00 C     | ATOM 89 N THR 11 16.954 26.624 17.669 1.00 0.00 N     |
| ATOM 30 O THR 4 24.654 18.647 24.455 1.00 0.00 O     | ATOM 90 CA THR 11 16.900 26.161 16.209 1.00 0.00 C    |
| ATOM 31 N TRP 5 25.180 19.807 26.373 1.00 0.00 N     | ATOM 91 CB THR 11 15.763 26.801 15.378 1.00 0.00 C    |
| ATOM 32 CA TRP 5 24.208 19.233 27.306 1.00 0.00 C    | ATOM 92 CG2 THR 11 14.352 26.291 15.692 1.00 0.00 C   |
| ATOM 33 CB TRP 5 24.827 18.854 28.665 1.00 0.00 C    | ATOM 93 OG1 THR 11 15.703 28.147 15.797 1.00 0.00 O   |
| ATOM 34 CG TRP 5 25.740 17.653 28.616 1.00 0.00 C    | ATOM 94 C THR 11 18.307 26.334 15.478 1.00 0.00 C     |
| ATOM 35 CD1 TRP 5 25.680 16.566 27.801 1.00 0.00 C   | ATOM 95 O THR 11 18.325 25.896 14.323 1.00 0.00 O     |
| ATOM 36 NE1 TRP 5 26.569 15.594 28.175 1.00 0.00 N   | ATOM 96 N TRP 12 19.286 26.964 16.034 1.00 0.00 N     |
| ATOM 37 CE2 TRP 5 27.394 16.018 29.116 1.00 0.00 C   | ATOM 97 CA TRP 12 20.536 27.319 15.320 1.00 0.00 C    |
| ATOM 38 CZ2 TRP 5 28.547 15.541 29.735 1.00 0.00 C   | ATOM 98 CB TRP 12 20.923 28.819 15.465 1.00 0.00 C    |
| ATOM 39 CH2 TRP 5 29.130 16.261 30.755 1.00 0.00 C   | ATOM 99 CG TRP 12 20.760 29.409 16.863 1.00 0.00 C    |
| ATOM 40 CZ3 TRP 5 28.683 17.516 31.128 1.00 0.00 C   | ATOM 100 CD1 TRP 12 21.404 28.970 17.955 1.00 0.00 C  |
| ATOM 41 CE3 TRP 5 27.550 18.077 30.488 1.00 0.00 C   | ATOM 101 NE1 TRP 12 21.120 29.749 19.009 1.00 0.00 N  |
| ATOM 42 CD2 TRP 5 26.889 17.316 29.491 1.00 0.00 C   | ATOM 102 CE2 TRP 12 20.232 30.740 18.711 1.00 0.00 C  |
| ATOM 43 C TRP 5 23.020 20.236 27.453 1.00 0.00 C     | ATOM 103 CZ2 TRP 12 19.571 31.695 19.462 1.00 0.00 C  |
| ATOM 44 O TRP 5 22.073 19.879 28.201 1.00 0.00 O     | ATOM 104 CH2 TRP 12 18.588 32.588 18.900 1.00 0.00 C  |
| ATOM 45 N GLU 6 23.054 21.383 26.761 1.00 0.00 N     | ATOM 105 CZ3 TRP 12 18.254 32.309 17.592 1.00 0.00 C  |
| ATOM 46 CA GLU 6 21.873 22.292 26.659 1.00 0.00 C    | ATOM 106 CE3 TRP 12 18.820 31.276 16.840 1.00 0.00 C  |
| ATOM 47 CB GLU 6 22.303 23.725 27.059 1.00 0.00 C    | ATOM 107 CD2 TRP 12 19.938 30.546 17.322 1.00 0.00 C  |
| ATOM 48 CG GLU 6 22.721 23.701 28.568 1.00 0.00 C    | ATOM 108 C TRP 12 21.600 26.375 15.769 1.00 0.00 C    |
| ATOM 49 CD GLU 6 23.050 25.140 29.036 1.00 0.00 C    | ATOM 109 O TRP 12 21.669 25.883 16.860 1.00 0.00 O    |
| ATOM 50 OE1 GLU 6 24.097 25.257 29.745 1.00 0.00 O   | ATOM 110 N LYS 13 22.504 26.092 14.806 1.00 0.00 N    |
| ATOM 51 OE2 GLU 6 22.365 26.164 28.672 1.00 0.00 O1- | ATOM 111 CA LYS 13 23.678 25.181 14.892 1.00 0.00 C   |
| ATOM 52 C GLU 6 21.058 22.265 25.318 1.00 0.00 C     | ATOM 112 CB LYS 13 23.589 23.825 14.290 1.00 0.00 C   |
| ATOM 53 O GLU 6 20.534 23.255 24.830 1.00 0.00 O     | ATOM 113 CG LYS 13 22.606 22.954 15.034 1.00 0.00 C   |
| ATOM 54 N ASN 7 21.236 21.184 24.564 1.00 0.00 N     | ATOM 114 CD LYS 13 22.711 21.451 14.811 1.00 0.00 C   |
| ATOM 55 CA ASN 7 20.725 20.855 23.295 1.00 0.00 C    | ATOM 115 CE LYS 13 22.001 21.163 13.431 1.00 0.00 C   |
| ATOM 56 CB ASN 7 21.297 19.414 22.986 1.00 0.00 C    | ATOM 116 NZ LYS 13 22.004 19.726 13.112 1.00 0.00 N1+ |
| ATOM 57 CG ASN 7 21.523 19.146 21.490 1.00 0.00 C    | ATOM 117 C LYS 13 25.040 25.831 14.504 1.00 0.00 C    |
| ATOM 58 OD1 ASN 7 22.446 19.591 20.888 1.00 0.00 O   | ATOM 118 O LYS 13 25.172 26.598 13.530 1.00 0.00 O    |
| ATOM 59 ND2 ASN 7 20.669 18.441 20.874 1.00 0.00 N   | ATOM 119 N NHE 14 26.102 25.549 15.260 1.00 0.00 N    |
| ATOM 60 C ASN 7 19.195 20.867 23.124 1.00 0.00 C     | TER 120 NHE 14                                        |

## B2 misfolded

|                                                      |                                                       |
|------------------------------------------------------|-------------------------------------------------------|
| ATOM 1 CH3 ACE 1 27.375 19.046 34.055 1.00 0.00 C    | ATOM 61 O ASN 7 22.617 20.644 21.750 1.00 0.00 O      |
| ATOM 2 C ACE 1 27.392 20.412 33.367 1.00 0.00 C      | ATOM 62 N GLY 8 22.274 20.269 23.944 1.00 0.00 N      |
| ATOM 3 O ACE 1 27.360 21.446 34.032 1.00 0.00 O      | ATOM 63 CA GLY 8 20.828 20.278 23.841 1.00 0.00 C     |
| ATOM 4 N SER 2 27.440 20.412 32.055 1.00 0.00 N      | ATOM 64 C GLY 8 20.344 21.619 23.308 1.00 0.00 C      |
| ATOM 5 CA SER 2 27.461 21.648 31.298 1.00 0.00 C     | ATOM 65 O GLY 8 19.485 21.668 22.430 1.00 0.00 O      |
| ATOM 6 CB SER 2 28.676 22.496 31.664 1.00 0.00 C     | ATOM 66 N LYS 9 20.896 22.710 23.844 1.00 0.00 N      |
| ATOM 7 OG SER 2 28.660 23.704 30.899 1.00 0.00 O     | ATOM 67 CA LYS 9 20.520 24.044 23.423 1.00 0.00 C     |
| ATOM 8 C SER 2 27.518 21.375 29.802 1.00 0.00 C      | ATOM 68 CB LYS 9 21.302 25.103 24.192 1.00 0.00 C     |
| ATOM 9 O SER 2 26.793 21.994 29.027 1.00 0.00 O      | ATOM 69 CG LYS 9 20.877 26.491 23.721 1.00 0.00 C     |
| ATOM 10 N TRP 3 28.383 20.442 29.398 1.00 0.00 N     | ATOM 70 CD LYS 9 21.659 27.550 24.492 1.00 0.00 C     |
| ATOM 11 CA TRP 3 28.532 20.090 28.000 1.00 0.00 C    | ATOM 71 CE LYS 9 21.235 28.937 24.020 1.00 0.00 C     |
| ATOM 12 CB TRP 3 29.585 19.001 27.817 1.00 0.00 C    | ATOM 72 NZ LYS 9 21.988 29.958 24.762 1.00 0.00 N1+   |
| ATOM 13 CG TRP 3 29.810 18.567 26.389 1.00 0.00 C    | ATOM 73 C LYS 9 20.796 24.249 21.940 1.00 0.00 C      |
| ATOM 14 CD1 TRP 3 30.671 17.635 25.957 1.00 0.00 C   | ATOM 74 O LYS 9 19.959 24.788 21.218 1.00 0.00 O      |
| ATOM 15 NE1 TRP 3 30.535 17.567 24.535 1.00 0.00 N   | ATOM 75 N TRP 10 21.974 23.817 21.486 1.00 0.00 N     |
| ATOM 16 CE2 TRP 3 29.627 18.429 24.152 1.00 0.00 C   | ATOM 76 CA TRP 10 22.355 23.954 20.094 1.00 0.00 C    |
| ATOM 17 CZ2 TRP 3 29.180 18.692 22.851 1.00 0.00 C   | ATOM 77 CB TRP 10 23.746 23.379 19.847 1.00 0.00 C    |
| ATOM 18 CH2 TRP 3 28.197 19.667 22.729 1.00 0.00 C   | ATOM 78 CG TRP 10 24.232 23.476 18.420 1.00 0.00 C    |
| ATOM 19 CZ3 TRP 3 27.716 20.310 23.815 1.00 0.00 C   | ATOM 79 CD1 TRP 10 25.408 23.051 17.938 1.00 0.00 C   |
| ATOM 20 CE3 TRP 3 28.181 20.028 25.116 1.00 0.00 C   | ATOM 80 NE1 TRP 10 25.422 23.355 16.541 1.00 0.00 N   |
| ATOM 21 CD2 TRP 3 29.171 19.046 25.239 1.00 0.00 C   | ATOM 81 CE2 TRP 10 24.293 23.937 16.220 1.00 0.00 C   |
| ATOM 22 C TRP 3 27.222 19.573 27.423 1.00 0.00 C     | ATOM 82 CZ2 TRP 10 23.889 24.399 14.962 1.00 0.00 C   |
| ATOM 23 O TRP 3 26.827 19.962 26.326 1.00 0.00 O     | ATOM 83 CH2 TRP 10 22.628 24.984 14.903 1.00 0.00 C   |
| ATOM 24 N THR 4 26.548 18.693 28.167 1.00 0.00 N     | ATOM 84 CZ3 TRP 10 21.858 25.086 16.007 1.00 0.00 C   |
| ATOM 25 CA THR 4 25.289 18.126 27.727 1.00 0.00 C    | ATOM 85 CE3 TRP 10 22.286 24.613 17.264 1.00 0.00 C   |
| ATOM 26 CB THR 4 24.734 17.153 28.762 1.00 0.00 C    | ATOM 86 CD2 TRP 10 23.555 24.026 17.324 1.00 0.00 C   |
| ATOM 27 CG2 THR 4 25.730 16.019 28.978 1.00 0.00 C   | ATOM 87 C TRP 10 21.380 23.220 19.184 1.00 0.00 C     |
| ATOM 28 OG1 THR 4 24.521 17.841 29.998 1.00 0.00 O   | ATOM 88 O TRP 10 20.960 23.754 18.160 1.00 0.00 O     |
| ATOM 29 C THR 4 24.246 19.214 27.507 1.00 0.00 C     | ATOM 89 N THR 11 21.020 21.990 19.561 1.00 0.00 N     |
| ATOM 30 O THR 4 23.539 19.204 26.503 1.00 0.00 O     | ATOM 90 CA THR 11 20.099 21.190 18.781 1.00 0.00 C    |
| ATOM 31 N TRP 5 24.154 20.153 28.451 1.00 0.00 N     | ATOM 91 CB THR 11 19.862 19.832 19.435 1.00 0.00 C    |
| ATOM 32 CA TRP 5 23.202 21.241 28.357 1.00 0.00 C    | ATOM 92 CG2 THR 11 21.185 19.084 19.546 1.00 0.00 C   |
| ATOM 33 CB TRP 5 23.306 22.168 29.564 1.00 0.00 C    | ATOM 93 OG1 THR 11 19.310 20.022 20.740 1.00 0.00 O   |
| ATOM 34 CG TRP 5 22.350 23.337 29.556 1.00 0.00 C    | ATOM 94 C THR 11 18.750 21.882 18.644 1.00 0.00 C     |
| ATOM 35 CD1 TRP 5 22.236 24.292 30.489 1.00 0.00 C   | ATOM 95 O THR 11 18.180 21.928 17.557 1.00 0.00 O     |
| ATOM 36 NE1 TRP 5 21.204 25.180 30.054 1.00 0.00 N   | ATOM 96 N TRP 12 18.241 22.423 19.754 1.00 0.00 N     |
| ATOM 37 CE2 TRP 5 20.731 24.757 28.907 1.00 0.00 C   | ATOM 97 CA TRP 12 16.965 23.109 19.755 1.00 0.00 C    |
| ATOM 38 CZ2 TRP 5 19.715 25.326 28.130 1.00 0.00 C   | ATOM 98 CB TRP 12 16.623 23.629 21.147 1.00 0.00 C    |
| ATOM 39 CH2 TRP 5 19.410 24.664 26.946 1.00 0.00 C   | ATOM 99 CG TRP 12 15.306 24.361 21.248 1.00 0.00 C    |
| ATOM 40 CZ3 TRP 5 20.068 23.541 26.589 1.00 0.00 C   | ATOM 100 CD1 TRP 12 14.773 24.912 22.348 1.00 0.00 C  |
| ATOM 41 CE3 TRP 5 21.089 22.986 27.386 1.00 0.00 C   | ATOM 101 NE1 TRP 12 13.524 25.492 21.961 1.00 0.00 N  |
| ATOM 42 CD2 TRP 5 21.397 23.653 28.579 1.00 0.00 C   | ATOM 102 CE2 TRP 12 13.336 25.285 20.681 1.00 0.00 C  |
| ATOM 43 C TRP 5 23.443 22.075 27.107 1.00 0.00 C     | ATOM 103 CZ2 TRP 12 12.248 25.681 19.894 1.00 0.00 C  |
| ATOM 44 O TRP 5 22.503 22.420 26.395 1.00 0.00 O     | ATOM 104 CH2 TRP 12 12.306 25.328 18.551 1.00 0.00 C  |
| ATOM 45 N GLU 6 24.711 22.399 26.841 1.00 0.00 N     | ATOM 105 CZ3 TRP 12 13.360 24.642 18.058 1.00 0.00 C  |
| ATOM 46 CA GLU 6 25.072 23.190 25.681 1.00 0.00 C    | ATOM 106 CE3 TRP 12 14.444 24.253 18.870 1.00 0.00 C  |
| ATOM 47 CB GLU 6 26.578 23.413 25.617 1.00 0.00 C    | ATOM 107 CD2 TRP 12 14.386 24.610 20.222 1.00 0.00 C  |
| ATOM 48 CG GLU 6 26.913 24.239 24.398 1.00 0.00 C    | ATOM 108 C TRP 12 16.983 24.300 18.806 1.00 0.00 C    |
| ATOM 49 CD GLU 6 28.423 24.462 24.333 1.00 0.00 C    | ATOM 109 O TRP 12 16.042 24.501 18.041 1.00 0.00 O    |
| ATOM 50 OE1 GLU 6 29.105 23.610 23.705 1.00 0.00 O   | ATOM 110 N LYS 13 18.058 25.089 18.858 1.00 0.00 N    |
| ATOM 51 OE2 GLU 6 28.879 25.484 24.912 1.00 0.00 O1- | ATOM 111 CA LYS 13 18.195 26.254 18.006 1.00 0.00 C   |
| ATOM 52 C GLU 6 24.649 22.498 24.394 1.00 0.00 C     | ATOM 112 CB LYS 13 19.512 26.975 18.268 1.00 0.00 C   |
| ATOM 53 O GLU 6 24.093 23.131 23.498 1.00 0.00 O     | ATOM 113 CG LYS 13 19.617 28.191 17.354 1.00 0.00 C   |
| ATOM 54 N ASN 7 24.913 21.192 24.302 1.00 0.00 N     | ATOM 114 CD LYS 13 20.935 28.911 17.617 1.00 0.00 C   |
| ATOM 55 CA ASN 7 24.560 20.420 23.127 1.00 0.00 C    | ATOM 115 CE LYS 13 21.040 30.127 16.703 1.00 0.00 C   |
| ATOM 56 CB ASN 7 24.975 18.962 23.284 1.00 0.00 C    | ATOM 116 NZ LYS 13 22.310 30.823 16.956 1.00 0.00 N1+ |
| ATOM 57 CG ASN 7 24.604 18.151 22.050 1.00 0.00 C    | ATOM 117 C LYS 13 18.163 25.863 16.535 1.00 0.00 C    |
| ATOM 58 OD1 ASN 7 24.044 18.687 21.097 1.00 0.00 O   | ATOM 118 O LYS 13 18.035 24.687 16.205 1.00 0.00 O    |
| ATOM 59 ND2 ASN 7 24.919 16.853 22.071 1.00 0.00 N   | ATOM 119 N NHE 14 18.280 26.848 15.646 1.00 0.00 N    |
| ATOM 60 C ASN 7 23.059 20.454 22.880 1.00 0.00 C     | TER 120 NHE 14                                        |



## B3 extended

|                                                     |                                                        |
|-----------------------------------------------------|--------------------------------------------------------|
| ATOM 1 CH3 ACE 1 31.907 40.461 23.519 1.00 0.00 C   | ATOM 63 N THR 9 24.747 23.533 24.655 1.00 0.00 N       |
| ATOM 2 C ACE 1 31.519 39.316 22.646 1.00 0.00 C     | ATOM 64 CA THR 9 24.957 22.112 24.720 1.00 0.00 C      |
| ATOM 3 O ACE 1 30.714 39.525 21.672 1.00 0.00 O     | ATOM 65 CB THR 9 26.480 21.881 24.860 1.00 0.00 C      |
| ATOM 4 N GLN 2 31.846 38.129 23.180 1.00 0.00 N     | ATOM 66 CG2 THR 9 26.832 20.429 24.588 1.00 0.00 C     |
| ATOM 5 CA GLN 2 31.472 36.833 22.648 1.00 0.00 C    | ATOM 67 OG1 THR 9 27.357 22.589 23.969 1.00 0.00 O     |
| ATOM 6 CB GLN 2 32.617 36.244 21.778 1.00 0.00 C    | ATOM 68 C THR 9 24.236 21.484 25.960 1.00 0.00 C       |
| ATOM 7 CG GLN 2 33.028 37.136 20.605 1.00 0.00 C    | ATOM 69 O THR 9 23.571 20.470 25.840 1.00 0.00 O       |
| ATOM 8 CD GLN 2 33.494 36.373 19.423 1.00 0.00 C    | ATOM 70 N GLY 10 24.253 22.238 27.056 1.00 0.00 N      |
| ATOM 9 OE1 GLN 2 32.737 35.597 18.771 1.00 0.00 O   | ATOM 71 CA GLY 10 23.442 21.890 28.193 1.00 0.00 C     |
| ATOM 10 NE2 GLN 2 34.787 36.529 18.924 1.00 0.00 N  | ATOM 72 C GLY 10 21.938 22.086 28.065 1.00 0.00 C      |
| ATOM 11 C GLN 2 31.019 35.786 23.705 1.00 0.00 C    | ATOM 73 O GLY 10 21.197 21.621 28.950 1.00 0.00 O      |
| ATOM 12 O GLN 2 31.478 35.828 24.872 1.00 0.00 O    | ATOM 74 N LYS 11 21.358 22.642 27.010 1.00 0.00 N      |
| ATOM 13 N ILE 3 30.185 34.872 23.221 1.00 0.00 N    | ATOM 75 CA LYS 11 19.977 22.591 26.584 1.00 0.00 C     |
| ATOM 14 CA ILE 3 29.799 33.688 23.872 1.00 0.00 C   | ATOM 76 CB LYS 11 19.639 23.959 26.032 1.00 0.00 C     |
| ATOM 15 CB ILE 3 28.223 33.735 24.121 1.00 0.00 C   | ATOM 77 CG LYS 11 19.116 24.912 27.153 1.00 0.00 C     |
| ATOM 16 CG2 ILE 3 27.809 34.717 25.214 1.00 0.00 C  | ATOM 78 CD LYS 11 18.953 26.373 26.701 1.00 0.00 C     |
| ATOM 17 CG1 ILE 3 27.412 33.761 22.757 1.00 0.00 C  | ATOM 79 CE LYS 11 18.454 27.297 27.827 1.00 0.00 C     |
| ATOM 18 CD1 ILE 3 26.093 33.002 22.733 1.00 0.00 C  | ATOM 80 NZ LYS 11 16.986 27.060 28.100 1.00 0.00 NI+   |
| ATOM 19 C ILE 3 30.183 32.293 23.340 1.00 0.00 C    | ATOM 81 C LYS 11 19.701 21.495 25.458 1.00 0.00 C      |
| ATOM 20 O ILE 3 30.542 32.185 22.162 1.00 0.00 O    | ATOM 82 O LYS 11 18.545 21.239 25.131 1.00 0.00 O      |
| ATOM 21 N PHE 4 30.133 31.306 24.241 1.00 0.00 N    | ATOM 83 N THR 12 20.733 20.813 24.876 1.00 0.00 N      |
| ATOM 22 CA PHE 4 30.585 29.930 24.051 1.00 0.00 C   | ATOM 84 CA THR 12 20.708 20.088 23.671 1.00 0.00 C     |
| ATOM 23 CB PHE 4 31.618 29.535 25.056 1.00 0.00 C   | ATOM 85 CB THR 12 21.294 20.710 22.455 1.00 0.00 C     |
| ATOM 24 CG PHE 4 33.022 30.173 24.876 1.00 0.00 C   | ATOM 86 CG2 THR 12 20.187 21.567 21.741 1.00 0.00 C    |
| ATOM 25 CD1 PHE 4 33.558 31.167 25.726 1.00 0.00 C  | ATOM 87 OG1 THR 12 22.483 21.472 22.585 1.00 0.00 O    |
| ATOM 26 CE1 PHE 4 34.914 31.454 25.702 1.00 0.00 C  | ATOM 88 C THR 12 21.225 18.610 23.764 1.00 0.00 C      |
| ATOM 27 CZ PHE 4 35.721 30.868 24.663 1.00 0.00 C   | ATOM 89 O THR 12 20.779 17.767 23.068 1.00 0.00 O      |
| ATOM 28 CE2 PHE 4 35.152 29.963 23.709 1.00 0.00 C  | ATOM 90 N ILE 13 22.197 18.321 24.657 1.00 0.00 N      |
| ATOM 29 CD2 PHE 4 33.792 29.717 23.800 1.00 0.00 C  | ATOM 91 CA ILE 13 22.849 17.034 24.749 1.00 0.00 C     |
| ATOM 30 C PHE 4 29.340 28.965 24.211 1.00 0.00 C    | ATOM 92 CB ILE 13 24.158 17.181 25.682 1.00 0.00 C     |
| ATOM 31 O PHE 4 28.373 29.294 24.900 1.00 0.00 O    | ATOM 93 CG2 ILE 13 23.806 17.390 27.129 1.00 0.00 C    |
| ATOM 32 N VAL 5 29.370 27.880 23.433 1.00 0.00 N    | ATOM 94 CG1 ILE 13 25.081 15.971 25.540 1.00 0.00 C    |
| ATOM 33 CA VAL 5 28.225 26.876 23.312 1.00 0.00 C   | ATOM 95 CD1 ILE 13 25.729 15.791 24.199 1.00 0.00 C    |
| ATOM 34 CB VAL 5 28.301 25.944 22.080 1.00 0.00 C   | ATOM 96 C ILE 13 21.926 15.860 25.192 1.00 0.00 C      |
| ATOM 35 CG1 VAL 5 28.482 26.818 20.847 1.00 0.00 C  | ATOM 97 O ILE 13 22.157 14.775 24.744 1.00 0.00 O      |
| ATOM 36 CG2 VAL 5 29.559 25.029 22.172 1.00 0.00 C  | ATOM 98 N THR 14 20.953 16.079 26.096 1.00 0.00 N      |
| ATOM 37 C VAL 5 27.961 26.030 24.587 1.00 0.00 C    | ATOM 99 CA THR 14 19.901 15.165 26.380 1.00 0.00 C     |
| ATOM 38 O VAL 5 27.047 25.196 24.648 1.00 0.00 O    | ATOM 100 CB THR 14 19.333 15.429 27.773 1.00 0.00 C    |
| ATOM 39 N LYS 6 28.771 26.261 25.589 1.00 0.00 N    | ATOM 101 CG2 THR 14 20.358 15.067 28.832 1.00 0.00 C   |
| ATOM 40 CA LYS 6 28.770 25.516 26.887 1.00 0.00 C   | ATOM 102 OG1 THR 14 19.157 16.885 27.959 1.00 0.00 O   |
| ATOM 41 CB LYS 6 29.712 26.175 27.894 1.00 0.00 C   | ATOM 103 C THR 14 18.735 15.234 25.478 1.00 0.00 C     |
| ATOM 42 CG LYS 6 29.761 25.308 29.075 1.00 0.00 C   | ATOM 104 O THR 14 17.856 14.383 25.642 1.00 0.00 O     |
| ATOM 43 CD LYS 6 30.692 25.833 30.143 1.00 0.00 C   | ATOM 105 N LEU 15 18.733 16.126 24.442 1.00 0.00 N     |
| ATOM 44 CE LYS 6 31.027 24.900 31.348 1.00 0.00 C   | ATOM 106 CA LEU 15 17.765 16.257 23.330 1.00 0.00 C    |
| ATOM 45 NZ LYS 6 31.910 25.685 32.306 1.00 0.00 NI+ | ATOM 107 CB LEU 15 17.460 17.832 22.954 1.00 0.00 C    |
| ATOM 46 C LYS 6 27.401 25.429 27.390 1.00 0.00 C    | ATOM 108 CG LEU 15 16.416 17.938 21.821 1.00 0.00 C    |
| ATOM 47 O LYS 6 26.938 24.326 27.714 1.00 0.00 O    | ATOM 109 CD1 LEU 15 15.034 17.389 22.028 1.00 0.00 C   |
| ATOM 48 N THR 7 26.676 26.534 27.386 1.00 0.00 N    | ATOM 110 CD2 LEU 15 16.257 19.396 21.423 1.00 0.00 C   |
| ATOM 49 CA THR 7 25.344 26.749 27.941 1.00 0.00 C   | ATOM 111 C LEU 15 18.311 15.449 22.093 1.00 0.00 C     |
| ATOM 50 CB THR 7 25.127 28.275 28.259 1.00 0.00 C   | ATOM 112 O LEU 15 17.657 14.503 21.647 1.00 0.00 O     |
| ATOM 51 CG2 THR 7 26.131 28.858 29.179 1.00 0.00 C  | ATOM 113 N GLU 16 19.379 15.979 21.432 1.00 0.00 N     |
| ATOM 52 OG1 THR 7 25.196 29.021 27.073 1.00 0.00 O  | ATOM 114 CA GLU 16 19.946 15.381 20.205 1.00 0.00 C    |
| ATOM 53 C THR 7 24.132 26.292 27.015 1.00 0.00 C    | ATOM 115 CB GLU 16 20.482 16.463 19.284 1.00 0.00 C    |
| ATOM 54 O THR 7 23.078 25.982 27.513 1.00 0.00 O    | ATOM 116 CG GLU 16 19.404 17.475 18.885 1.00 0.00 C    |
| ATOM 55 N LEU 8 24.313 26.250 25.680 1.00 0.00 N    | ATOM 117 CD GLU 16 19.786 18.233 17.584 1.00 0.00 C    |
| ATOM 56 CA LEU 8 23.509 25.638 24.651 1.00 0.00 C   | ATOM 118 OE1 GLU 16 20.679 19.118 17.696 1.00 0.00 O   |
| ATOM 57 CB LEU 8 23.945 26.298 23.303 1.00 0.00 C   | ATOM 119 OE2 GLU 16 19.249 17.974 16.480 1.00 0.00 O1- |
| ATOM 58 CG LEU 8 23.178 25.711 22.117 1.00 0.00 C   | ATOM 120 C GLU 16 20.918 14.213 20.528 1.00 0.00 C     |
| ATOM 59 CD1 LEU 8 21.733 26.250 22.049 1.00 0.00 C  | ATOM 121 O GLU 16 21.240 13.487 19.582 1.00 0.00 O     |
| ATOM 60 CD2 LEU 8 23.993 26.138 20.880 1.00 0.00 C  | ATOM 122 N NHE 17 21.422 14.088 21.715 1.00 0.00 N     |
| ATOM 61 C LEU 8 23.574 24.125 24.598 1.00 0.00 C    | TER 123 NHE 17                                         |
| ATOM 62 O LEU 8 22.544 23.437 24.463 1.00 0.00 O    |                                                        |

### B3 misfolded

|          |         |    |        |        |        |      |      |     |
|----------|---------|----|--------|--------|--------|------|------|-----|
| ATOM 1   | CH3 ACE | 1  | 27.711 | 17.233 | 34.712 | 1.00 | 0.00 | C   |
| ATOM 2   | C ACE   | 1  | 27.971 | 18.665 | 34.241 | 1.00 | 0.00 | C   |
| ATOM 3   | O ACE   | 1  | 28.066 | 19.582 | 35.054 | 1.00 | 0.00 | O   |
| ATOM 4   | N GLN   | 2  | 28.083 | 18.850 | 32.945 | 1.00 | 0.00 | N   |
| ATOM 5   | CA GLN  | 2  | 28.330 | 20.164 | 32.386 | 1.00 | 0.00 | C   |
| ATOM 6   | CB GLN  | 2  | 29.641 | 20.744 | 32.907 | 1.00 | 0.00 | C   |
| ATOM 7   | CG GLN  | 2  | 29.863 | 22.124 | 32.298 | 1.00 | 0.00 | C   |
| ATOM 8   | CD GLN  | 2  | 31.165 | 22.738 | 32.794 | 1.00 | 0.00 | C   |
| ATOM 9   | OE1 GLN | 2  | 31.881 | 22.128 | 33.584 | 1.00 | 0.00 | O   |
| ATOM 10  | NE2 GLN | 2  | 31.469 | 23.952 | 32.327 | 1.00 | 0.00 | N   |
| ATOM 11  | C GLN   | 2  | 28.417 | 20.107 | 30.869 | 1.00 | 0.00 | C   |
| ATOM 12  | O GLN   | 2  | 27.835 | 20.941 | 30.179 | 1.00 | 0.00 | O   |
| ATOM 13  | N ILE   | 3  | 29.147 | 19.118 | 30.348 | 1.00 | 0.00 | N   |
| ATOM 14  | CA ILE  | 3  | 29.308 | 18.956 | 28.917 | 1.00 | 0.00 | C   |
| ATOM 15  | CB ILE  | 3  | 30.192 | 17.744 | 28.640 | 1.00 | 0.00 | C   |
| ATOM 16  | CG2 ILE | 3  | 29.540 | 16.495 | 29.223 | 1.00 | 0.00 | C   |
| ATOM 17  | CG1 ILE | 3  | 30.360 | 17.573 | 27.133 | 1.00 | 0.00 | C   |
| ATOM 18  | CD1 ILE | 3  | 31.244 | 16.362 | 26.856 | 1.00 | 0.00 | C   |
| ATOM 19  | C ILE   | 3  | 27.963 | 18.744 | 28.236 | 1.00 | 0.00 | C   |
| ATOM 20  | O ILE   | 3  | 27.687 | 19.348 | 27.201 | 1.00 | 0.00 | O   |
| ATOM 21  | N PHE   | 4  | 27.126 | 17.883 | 28.820 | 1.00 | 0.00 | N   |
| ATOM 22  | CA PHE  | 4  | 25.818 | 17.596 | 28.268 | 1.00 | 0.00 | C   |
| ATOM 23  | CB PHE  | 4  | 25.071 | 16.582 | 29.128 | 1.00 | 0.00 | C   |
| ATOM 24  | CG PHE  | 4  | 23.692 | 16.217 | 28.633 | 1.00 | 0.00 | C   |
| ATOM 25  | CD1 PHE | 4  | 22.913 | 15.296 | 29.344 | 1.00 | 0.00 | C   |
| ATOM 26  | CE1 PHE | 4  | 21.634 | 14.959 | 28.884 | 1.00 | 0.00 | C   |
| ATOM 27  | CZ PHE  | 4  | 21.134 | 15.543 | 27.714 | 1.00 | 0.00 | C   |
| ATOM 28  | CE2 PHE | 4  | 21.912 | 16.464 | 27.003 | 1.00 | 0.00 | C   |
| ATOM 29  | CD2 PHE | 4  | 23.191 | 16.802 | 27.463 | 1.00 | 0.00 | C   |
| ATOM 30  | C PHE   | 4  | 24.967 | 18.856 | 28.190 | 1.00 | 0.00 | C   |
| ATOM 31  | O PHE   | 4  | 24.316 | 19.107 | 27.178 | 1.00 | 0.00 | O   |
| ATOM 32  | N VAL   | 5  | 24.974 | 19.649 | 29.263 | 1.00 | 0.00 | N   |
| ATOM 33  | CA VAL  | 5  | 24.207 | 20.877 | 29.313 | 1.00 | 0.00 | C   |
| ATOM 34  | CB VAL  | 5  | 24.394 | 21.588 | 30.649 | 1.00 | 0.00 | C   |
| ATOM 35  | CG1 VAL | 5  | 25.868 | 21.927 | 30.842 | 1.00 | 0.00 | C   |
| ATOM 36  | CG2 VAL | 5  | 23.572 | 22.873 | 30.660 | 1.00 | 0.00 | C   |
| ATOM 37  | C VAL   | 5  | 24.635 | 21.836 | 28.211 | 1.00 | 0.00 | C   |
| ATOM 38  | O VAL   | 5  | 23.794 | 22.427 | 27.537 | 1.00 | 0.00 | O   |
| ATOM 39  | N LYS   | 6  | 25.948 | 21.989 | 28.029 | 1.00 | 0.00 | N   |
| ATOM 40  | CA LYS  | 6  | 26.483 | 22.874 | 27.013 | 1.00 | 0.00 | C   |
| ATOM 41  | CB LYS  | 6  | 28.007 | 22.861 | 27.021 | 1.00 | 0.00 | C   |
| ATOM 42  | CG LYS  | 6  | 28.529 | 23.801 | 25.940 | 1.00 | 0.00 | C   |
| ATOM 43  | CD LYS  | 6  | 30.054 | 23.789 | 25.948 | 1.00 | 0.00 | C   |
| ATOM 44  | CE LYS  | 6  | 30.576 | 24.729 | 24.867 | 1.00 | 0.00 | C   |
| ATOM 45  | NZ LYS  | 6  | 32.046 | 24.717 | 24.874 | 1.00 | 0.00 | N1+ |
| ATOM 46  | C LYS   | 6  | 26.022 | 22.454 | 25.625 | 1.00 | 0.00 | C   |
| ATOM 47  | O LYS   | 6  | 25.614 | 23.292 | 24.823 | 1.00 | 0.00 | O   |
| ATOM 48  | N THR   | 7  | 26.086 | 21.151 | 25.342 | 1.00 | 0.00 | N   |
| ATOM 49  | CA THR  | 7  | 25.676 | 20.626 | 24.055 | 1.00 | 0.00 | C   |
| ATOM 50  | CB THR  | 7  | 25.853 | 19.112 | 23.998 | 1.00 | 0.00 | C   |
| ATOM 51  | CG2 THR | 7  | 27.321 | 18.763 | 24.222 | 1.00 | 0.00 | C   |
| ATOM 52  | OG1 THR | 7  | 25.056 | 18.501 | 25.015 | 1.00 | 0.00 | O   |
| ATOM 53  | C THR   | 7  | 24.211 | 20.934 | 23.778 | 1.00 | 0.00 | C   |
| ATOM 54  | O THR   | 7  | 23.860 | 21.356 | 22.679 | 1.00 | 0.00 | O   |
| ATOM 55  | N LEU   | 8  | 23.357 | 20.723 | 24.781 | 1.00 | 0.00 | N   |
| ATOM 56  | CA LEU  | 8  | 21.937 | 20.977 | 24.644 | 1.00 | 0.00 | C   |
| ATOM 57  | CB LEU  | 8  | 21.193 | 20.652 | 25.935 | 1.00 | 0.00 | C   |
| ATOM 58  | CG LEU  | 8  | 19.706 | 20.934 | 25.750 | 1.00 | 0.00 | C   |
| ATOM 59  | CD1 LEU | 8  | 19.162 | 20.068 | 24.618 | 1.00 | 0.00 | C   |
| ATOM 60  | CD2 LEU | 8  | 18.962 | 20.608 | 27.041 | 1.00 | 0.00 | C   |
| ATOM 61  | C LEU   | 8  | 21.672 | 22.439 | 24.310 | 1.00 | 0.00 | C   |
| ATOM 62  | O LEU   | 8  | 20.870 | 22.742 | 23.431 | 1.00 | 0.00 | O   |
| ATOM 63  | N THR   | 9  | 22.351 | 23.345 | 25.017 | 1.00 | 0.00 | N   |
| ATOM 64  | CA THR  | 9  | 22.187 | 24.768 | 24.794 | 1.00 | 0.00 | C   |
| ATOM 65  | CB THR  | 9  | 23.077 | 25.576 | 25.734 | 1.00 | 0.00 | C   |
| ATOM 66  | CG2 THR | 9  | 22.707 | 25.263 | 27.180 | 1.00 | 0.00 | C   |
| ATOM 67  | OG1 THR | 9  | 24.447 | 25.231 | 25.506 | 1.00 | 0.00 | O   |
| ATOM 68  | C THR   | 9  | 22.555 | 25.145 | 23.367 | 1.00 | 0.00 | C   |
| ATOM 69  | O THR   | 9  | 21.837 | 25.902 | 22.717 | 1.00 | 0.00 | O   |
| ATOM 70  | N GLY   | 10 | 23.679 | 24.614 | 22.878 | 1.00 | 0.00 | N   |
| ATOM 71  | CA GLY  | 10 | 24.137 | 24.896 | 21.533 | 1.00 | 0.00 | C   |
| ATOM 72  | C GLY   | 10 | 23.097 | 24.449 | 20.514 | 1.00 | 0.00 | C   |
| ATOM 73  | O GLY   | 10 | 22.792 | 25.178 | 19.573 | 1.00 | 0.00 | O   |
| ATOM 74  | N LYS   | 11 | 22.552 | 23.245 | 20.704 | 1.00 | 0.00 | N   |
| ATOM 75  | CA LYS  | 11 | 21.551 | 22.707 | 19.805 | 1.00 | 0.00 | C   |
| ATOM 76  | CB LYS  | 11 | 21.100 | 21.322 | 20.254 | 1.00 | 0.00 | C   |
| ATOM 77  | CG LYS  | 11 | 20.049 | 20.790 | 19.284 | 1.00 | 0.00 | C   |
| ATOM 78  | CD LYS  | 11 | 19.598 | 19.405 | 19.732 | 1.00 | 0.00 | C   |
| ATOM 79  | CE LYS  | 11 | 18.547 | 18.874 | 18.762 | 1.00 | 0.00 | C   |
| ATOM 80  | NZ LYS  | 11 | 18.112 | 17.538 | 19.193 | 1.00 | 0.00 | N1+ |
| ATOM 81  | C LYS   | 11 | 20.322 | 23.603 | 19.755 | 1.00 | 0.00 | C   |
| ATOM 82  | O LYS   | 11 | 19.801 | 23.886 | 18.677 | 1.00 | 0.00 | O   |
| ATOM 83  | N THR   | 12 | 19.859 | 24.050 | 20.924 | 1.00 | 0.00 | N   |
| ATOM 84  | CA THR  | 12 | 18.696 | 24.910 | 21.008 | 1.00 | 0.00 | C   |
| ATOM 85  | CB THR  | 12 | 18.385 | 25.272 | 22.457 | 1.00 | 0.00 | C   |
| ATOM 86  | CG2 THR | 12 | 18.109 | 23.999 | 23.251 | 1.00 | 0.00 | C   |
| ATOM 87  | OG1 THR | 12 | 19.503 | 25.957 | 23.028 | 1.00 | 0.00 | O   |
| ATOM 88  | C THR   | 12 | 18.916 | 26.207 | 20.242 | 1.00 | 0.00 | C   |
| ATOM 89  | O THR   | 12 | 18.040 | 26.651 | 19.503 | 1.00 | 0.00 | O   |
| ATOM 90  | N ILE   | 13 | 20.091 | 26.815 | 20.420 | 1.00 | 0.00 | N   |
| ATOM 91  | CA ILE  | 13 | 20.422 | 28.054 | 19.748 | 1.00 | 0.00 | C   |
| ATOM 92  | CB ILE  | 13 | 21.825 | 28.495 | 20.154 | 1.00 | 0.00 | C   |
| ATOM 93  | CG2 ILE | 13 | 22.830 | 27.418 | 19.758 | 1.00 | 0.00 | C   |
| ATOM 94  | CG1 ILE | 13 | 22.172 | 29.800 | 19.446 | 1.00 | 0.00 | C   |
| ATOM 95  | CD1 ILE | 13 | 23.575 | 30.240 | 19.851 | 1.00 | 0.00 | C   |
| ATOM 96  | C ILE   | 13 | 20.384 | 27.885 | 18.236 | 1.00 | 0.00 | C   |
| ATOM 97  | O ILE   | 13 | 19.834 | 28.726 | 17.527 | 1.00 | 0.00 | O   |
| ATOM 98  | N THR   | 14 | 20.970 | 26.792 | 17.742 | 1.00 | 0.00 | N   |
| ATOM 99  | CA THR  | 14 | 21.001 | 26.516 | 16.320 | 1.00 | 0.00 | C   |
| ATOM 100 | CB THR  | 14 | 21.729 | 25.208 | 16.030 | 1.00 | 0.00 | C   |
| ATOM 101 | CG2 THR | 14 | 23.163 | 25.301 | 16.540 | 1.00 | 0.00 | C   |
| ATOM 102 | OG1 THR | 14 | 21.058 | 24.132 | 16.691 | 1.00 | 0.00 | O   |
| ATOM 103 | C THR   | 14 | 19.593 | 26.400 | 15.754 | 1.00 | 0.00 | C   |
| ATOM 104 | O THR   | 14 | 19.297 | 26.956 | 14.699 | 1.00 | 0.00 | O   |
| ATOM 105 | N LEU   | 15 | 18.723 | 25.672 | 16.459 | 1.00 | 0.00 | N   |
| ATOM 106 | CA LEU  | 15 | 17.353 | 25.485 | 16.026 | 1.00 | 0.00 | C   |
| ATOM 107 | CB LEU  | 15 | 16.580 | 24.617 | 17.012 | 1.00 | 0.00 | C   |
| ATOM 108 | CG LEU  | 15 | 15.146 | 24.444 | 16.522 | 1.00 | 0.00 | C   |
| ATOM 109 | CD1 LEU | 15 | 15.154 | 23.774 | 15.151 | 1.00 | 0.00 | C   |
| ATOM 110 | CD2 LEU | 15 | 14.373 | 23.575 | 17.507 | 1.00 | 0.00 | C   |
| ATOM 111 | C LEU   | 15 | 16.627 | 26.818 | 15.913 | 1.00 | 0.00 | C   |
| ATOM 112 | O LEU   | 15 | 15.927 | 27.066 | 14.934 | 1.00 | 0.00 | O   |
| ATOM 113 | N GLU   | 16 | 16.797 | 27.679 | 16.920 | 1.00 | 0.00 | N   |
| ATOM 114 | CA GLU  | 16 | 16.160 | 28.980 | 16.930 | 1.00 | 0.00 | C   |
| ATOM 115 | CB GLU  | 16 | 16.522 | 29.758 | 18.191 | 1.00 | 0.00 | C   |
| ATOM 116 | CG GLU  | 16 | 15.840 | 31.105 | 18.163 | 1.00 | 0.00 | C   |
| ATOM 117 | CD GLU  | 16 | 16.202 | 31.884 | 19.426 | 1.00 | 0.00 | C   |
| ATOM 118 | OE1 GLU | 16 | 17.225 | 32.616 | 19.378 | 1.00 | 0.00 | O   |
| ATOM 119 | OE2 GLU | 16 | 15.450 | 31.740 | 20.428 | 1.00 | 0.00 | O1- |
| ATOM 120 | C GLU   | 16 | 16.593 | 29.811 | 15.730 | 1.00 | 0.00 | C   |
| ATOM 121 | O GLU   | 16 | 17.385 | 29.356 | 14.909 | 1.00 | 0.00 | O   |
| ATOM 122 | N NHE   | 17 | 16.075 | 31.035 | 15.625 | 1.00 | 0.00 | N   |
| TER 123  | NHE     | 17 |        |        |        |      |      |     |

## ID1 extended

|          |            |        |        |        |      |      |     |
|----------|------------|--------|--------|--------|------|------|-----|
| ATOM 1   | CH3 ACE 1  | 19.290 | 14.515 | 17.295 | 1.00 | 0.00 | C   |
| ATOM 2   | C ACE 1    | 20.294 | 15.592 | 17.607 | 1.00 | 0.00 | C   |
| ATOM 3   | O ACE 1    | 21.149 | 15.419 | 18.379 | 1.00 | 0.00 | O   |
| ATOM 4   | N ILE 2    | 20.232 | 16.772 | 16.895 | 1.00 | 0.00 | N   |
| ATOM 5   | CA ILE 2   | 21.240 | 17.823 | 16.853 | 1.00 | 0.00 | C   |
| ATOM 6   | CB ILE 2   | 21.774 | 18.003 | 15.376 | 1.00 | 0.00 | C   |
| ATOM 7   | CG2 ILE 2  | 22.586 | 19.332 | 15.299 | 1.00 | 0.00 | C   |
| ATOM 8   | CG1 ILE 2  | 22.488 | 16.784 | 14.841 | 1.00 | 0.00 | C   |
| ATOM 9   | CD1 ILE 2  | 22.771 | 16.820 | 13.313 | 1.00 | 0.00 | C   |
| ATOM 10  | C ILE 2    | 20.474 | 19.079 | 17.364 | 1.00 | 0.00 | C   |
| ATOM 11  | O ILE 2    | 19.383 | 19.390 | 16.928 | 1.00 | 0.00 | O   |
| ATOM 12  | N ASN 3    | 21.044 | 19.793 | 18.325 | 1.00 | 0.00 | N   |
| ATOM 13  | CA ASN 3   | 20.577 | 21.054 | 18.905 | 1.00 | 0.00 | C   |
| ATOM 14  | CB ASN 3   | 21.358 | 21.299 | 20.165 | 1.00 | 0.00 | C   |
| ATOM 15  | CG ASN 3   | 20.796 | 22.226 | 21.169 | 1.00 | 0.00 | C   |
| ATOM 16  | OD1 ASN 3  | 20.002 | 23.094 | 20.851 | 1.00 | 0.00 | O   |
| ATOM 17  | ND2 ASN 3  | 21.289 | 22.154 | 22.387 | 1.00 | 0.00 | N   |
| ATOM 18  | C ASN 3    | 20.617 | 22.201 | 17.840 | 1.00 | 0.00 | C   |
| ATOM 19  | O ASN 3    | 21.632 | 22.425 | 17.212 | 1.00 | 0.00 | O   |
| ATOM 20  | N TRP 4    | 19.454 | 22.827 | 17.621 | 1.00 | 0.00 | N   |
| ATOM 21  | CA TRP 4   | 19.340 | 23.922 | 16.684 | 1.00 | 0.00 | C   |
| ATOM 22  | CB TRP 4   | 17.970 | 23.812 | 15.958 | 1.00 | 0.00 | C   |
| ATOM 23  | CG TRP 4   | 16.731 | 23.695 | 16.774 | 1.00 | 0.00 | C   |
| ATOM 24  | CD1 TRP 4  | 15.732 | 24.602 | 16.789 | 1.00 | 0.00 | C   |
| ATOM 25  | NE1 TRP 4  | 14.791 | 24.197 | 17.754 | 1.00 | 0.00 | N   |
| ATOM 26  | CE2 TRP 4  | 15.076 | 22.954 | 18.267 | 1.00 | 0.00 | C   |
| ATOM 27  | CZ2 TRP 4  | 14.525 | 22.170 | 19.283 | 1.00 | 0.00 | C   |
| ATOM 28  | CH2 TRP 4  | 15.103 | 20.992 | 19.686 | 1.00 | 0.00 | C   |
| ATOM 29  | CZ3 TRP 4  | 16.214 | 20.503 | 19.023 | 1.00 | 0.00 | C   |
| ATOM 30  | CE3 TRP 4  | 16.816 | 21.280 | 17.969 | 1.00 | 0.00 | C   |
| ATOM 31  | CD2 TRP 4  | 16.318 | 22.552 | 17.628 | 1.00 | 0.00 | C   |
| ATOM 32  | C TRP 4    | 19.522 | 25.336 | 17.354 | 1.00 | 0.00 | C   |
| ATOM 33  | O TRP 4    | 19.795 | 26.283 | 16.582 | 1.00 | 0.00 | O   |
| ATOM 34  | N LEU 5    | 19.448 | 25.433 | 18.695 | 1.00 | 0.00 | N   |
| ATOM 35  | CA LEU 5   | 19.331 | 26.668 | 19.528 | 1.00 | 0.00 | C   |
| ATOM 36  | CB LEU 5   | 18.076 | 26.369 | 20.478 | 1.00 | 0.00 | C   |
| ATOM 37  | CG LEU 5   | 17.669 | 27.455 | 21.471 | 1.00 | 0.00 | C   |
| ATOM 38  | CD1 LEU 5  | 17.815 | 28.891 | 20.982 | 1.00 | 0.00 | C   |
| ATOM 39  | CD2 LEU 5  | 16.246 | 27.183 | 21.987 | 1.00 | 0.00 | C   |
| ATOM 40  | C LEU 5    | 20.714 | 26.985 | 20.204 | 1.00 | 0.00 | C   |
| ATOM 41  | O LEU 5    | 21.211 | 28.189 | 20.320 | 1.00 | 0.00 | O   |
| ATOM 42  | N LYS 6    | 21.421 | 25.942 | 20.781 | 1.00 | 0.00 | N   |
| ATOM 43  | CA LYS 6   | 22.623 | 26.157 | 21.645 | 1.00 | 0.00 | C   |
| ATOM 44  | CB LYS 6   | 22.342 | 25.783 | 23.159 | 1.00 | 0.00 | C   |
| ATOM 45  | CG LYS 6   | 21.306 | 26.831 | 23.679 | 1.00 | 0.00 | C   |
| ATOM 46  | CD LYS 6   | 20.890 | 26.586 | 25.146 | 1.00 | 0.00 | C   |
| ATOM 47  | CE LYS 6   | 20.050 | 27.860 | 25.495 | 1.00 | 0.00 | C   |
| ATOM 48  | NZ LYS 6   | 19.665 | 28.108 | 26.904 | 1.00 | 0.00 | N1+ |
| ATOM 49  | C LYS 6    | 23.914 | 25.517 | 21.087 | 1.00 | 0.00 | C   |
| ATOM 50  | O LYS 6    | 24.673 | 24.876 | 21.786 | 1.00 | 0.00 | O   |
| ATOM 51  | N LEU 7    | 24.165 | 25.508 | 19.823 | 1.00 | 0.00 | N   |
| ATOM 52  | CA LEU 7   | 25.184 | 24.651 | 19.219 | 1.00 | 0.00 | C   |
| ATOM 53  | CB LEU 7   | 24.797 | 24.451 | 17.702 | 1.00 | 0.00 | C   |
| ATOM 54  | CG LEU 7   | 25.750 | 23.528 | 16.877 | 1.00 | 0.00 | C   |
| ATOM 55  | CD1 LEU 7  | 25.849 | 22.049 | 17.329 | 1.00 | 0.00 | C   |
| ATOM 56  | CD2 LEU 7  | 24.986 | 23.481 | 15.505 | 1.00 | 0.00 | C   |
| ATOM 57  | C LEU 7    | 26.651 | 25.033 | 19.445 | 1.00 | 0.00 | C   |
| ATOM 58  | O LEU 7    | 27.604 | 24.229 | 19.575 | 1.00 | 0.00 | O   |
| ATOM 59  | N GLY 8    | 26.930 | 26.341 | 19.717 | 1.00 | 0.00 | N   |
| ATOM 60  | CA GLY 8   | 28.161 | 26.895 | 20.268 | 1.00 | 0.00 | C   |
| ATOM 61  | C GLY 8    | 28.485 | 26.342 | 21.703 | 1.00 | 0.00 | C   |
| ATOM 62  | O GLY 8    | 29.559 | 26.698 | 22.225 | 1.00 | 0.00 | O   |
| ATOM 63  | N LYS 9    | 27.596 | 25.628 | 22.424 | 1.00 | 0.00 | N   |
| ATOM 64  | CA LYS 9   | 27.817 | 25.042 | 23.773 | 1.00 | 0.00 | C   |
| ATOM 65  | CB LYS 9   | 26.858 | 25.646 | 24.741 | 1.00 | 0.00 | C   |
| ATOM 66  | CG LYS 9   | 27.420 | 26.971 | 25.174 | 1.00 | 0.00 | C   |
| ATOM 67  | CD LYS 9   | 26.593 | 27.540 | 26.290 | 1.00 | 0.00 | C   |
| ATOM 68  | CE LYS 9   | 27.158 | 28.886 | 26.884 | 1.00 | 0.00 | C   |
| ATOM 69  | NZ LYS 9   | 26.278 | 29.231 | 28.021 | 1.00 | 0.00 | N1+ |
| ATOM 70  | C LYS 9    | 27.870 | 23.441 | 23.846 | 1.00 | 0.00 | C   |
| ATOM 71  | O LYS 9    | 28.900 | 22.867 | 24.244 | 1.00 | 0.00 | O   |
| ATOM 72  | N MET 10   | 26.857 | 22.854 | 23.203 | 1.00 | 0.00 | N   |
| ATOM 73  | CA MET 10  | 26.578 | 21.426 | 22.972 | 1.00 | 0.00 | C   |
| ATOM 74  | CB MET 10  | 25.800 | 20.802 | 24.165 | 1.00 | 0.00 | C   |
| ATOM 75  | CG MET 10  | 26.771 | 20.407 | 25.307 | 1.00 | 0.00 | C   |
| ATOM 76  | SD MET 10  | 26.354 | 18.897 | 26.380 | 1.00 | 0.00 | S   |
| ATOM 77  | CE MET 10  | 27.700 | 17.757 | 25.967 | 1.00 | 0.00 | C   |
| ATOM 78  | C MET 10   | 25.777 | 21.121 | 21.655 | 1.00 | 0.00 | C   |
| ATOM 79  | O MET 10   | 24.792 | 21.773 | 21.267 | 1.00 | 0.00 | O   |
| ATOM 80  | N VAL 11   | 26.286 | 20.093 | 20.969 | 1.00 | 0.00 | N   |
| ATOM 81  | CA VAL 11  | 25.529 | 19.450 | 19.837 | 1.00 | 0.00 | C   |
| ATOM 82  | CB VAL 11  | 26.534 | 18.545 | 18.997 | 1.00 | 0.00 | C   |
| ATOM 83  | CG1 VAL 11 | 25.862 | 17.810 | 17.819 | 1.00 | 0.00 | C   |
| ATOM 84  | CG2 VAL 11 | 28.007 | 18.990 | 18.692 | 1.00 | 0.00 | C   |
| ATOM 85  | C VAL 11   | 24.380 | 18.619 | 20.252 | 1.00 | 0.00 | C   |
| ATOM 86  | O VAL 11   | 23.416 | 18.699 | 19.483 | 1.00 | 0.00 | O   |
| ATOM 87  | N ILE 12   | 24.369 | 17.854 | 21.344 | 1.00 | 0.00 | N   |
| ATOM 88  | CA ILE 12  | 23.202 | 16.970 | 21.682 | 1.00 | 0.00 | C   |
| ATOM 89  | CB ILE 12  | 23.642 | 15.677 | 22.393 | 1.00 | 0.00 | C   |
| ATOM 90  | CG2 ILE 12 | 24.307 | 15.809 | 23.771 | 1.00 | 0.00 | C   |
| ATOM 91  | CG1 ILE 12 | 22.473 | 14.716 | 22.483 | 1.00 | 0.00 | C   |
| ATOM 92  | CD1 ILE 12 | 22.846 | 13.286 | 22.808 | 1.00 | 0.00 | C   |
| ATOM 93  | C ILE 12   | 22.179 | 17.848 | 22.514 | 1.00 | 0.00 | C   |
| ATOM 94  | O ILE 12   | 22.517 | 18.764 | 23.250 | 1.00 | 0.00 | O   |
| ATOM 95  | N ASP 13   | 20.902 | 17.659 | 22.168 | 1.00 | 0.00 | N   |
| ATOM 96  | CA ASP 13  | 19.772 | 18.461 | 22.704 | 1.00 | 0.00 | C   |
| ATOM 97  | CB ASP 13  | 18.508 | 18.190 | 21.907 | 1.00 | 0.00 | C   |
| ATOM 98  | CG ASP 13  | 17.311 | 19.065 | 22.261 | 1.00 | 0.00 | C   |
| ATOM 99  | OD1 ASP 13 | 16.174 | 18.504 | 22.313 | 1.00 | 0.00 | O   |
| ATOM 100 | OD2 ASP 13 | 17.467 | 20.289 | 22.515 | 1.00 | 0.00 | O1- |
| ATOM 101 | C ASP 13   | 19.519 | 17.963 | 24.171 | 1.00 | 0.00 | C   |
| ATOM 102 | O ASP 13   | 19.834 | 16.872 | 24.538 | 1.00 | 0.00 | O   |
| ATOM 103 | N ALA 14   | 18.872 | 18.814 | 24.916 | 1.00 | 0.00 | N   |
| ATOM 104 | CA ALA 14  | 18.868 | 18.670 | 26.397 | 1.00 | 0.00 | C   |
| ATOM 105 | CB ALA 14  | 18.356 | 19.964 | 27.047 | 1.00 | 0.00 | C   |
| ATOM 106 | C ALA 14   | 18.237 | 17.346 | 26.849 | 1.00 | 0.00 | C   |
| ATOM 107 | O ALA 14   | 18.666 | 16.785 | 27.844 | 1.00 | 0.00 | O   |
| ATOM 108 | N LEU 15   | 17.152 | 16.862 | 26.128 | 1.00 | 0.00 | N   |
| ATOM 109 | CA LEU 15  | 16.374 | 15.615 | 26.241 | 1.00 | 0.00 | C   |
| ATOM 110 | CB LEU 15  | 14.855 | 15.929 | 26.300 | 1.00 | 0.00 | C   |
| ATOM 111 | CG LEU 15  | 14.420 | 16.877 | 27.418 | 1.00 | 0.00 | C   |
| ATOM 112 | CD1 LEU 15 | 12.889 | 16.914 | 27.299 | 1.00 | 0.00 | C   |
| ATOM 113 | CD2 LEU 15 | 14.781 | 16.378 | 28.853 | 1.00 | 0.00 | C   |
| ATOM 114 | C LEU 15   | 16.468 | 14.671 | 25.067 | 1.00 | 0.00 | C   |
| ATOM 115 | O LEU 15   | 16.804 | 15.105 | 24.022 | 1.00 | 0.00 | O   |
| ATOM 116 | N NHE 16   | 16.214 | 13.359 | 25.169 | 1.00 | 0.00 | N   |
| ATOM 117 | NHE 16     |        |        |        |      |      |     |

### ID1 misfolded

|                                                     |                                                        |
|-----------------------------------------------------|--------------------------------------------------------|
| ATOM 1 CH3 ACE 1 26.596 16.649 34.163 1.00 0.00 C   | ATOM 60 CA GLY 8 20.506 20.882 24.483 1.00 0.00 C      |
| ATOM 2 C ACE 1 26.968 18.042 33.650 1.00 0.00 C     | ATOM 61 C GLY 8 20.388 22.361 24.143 1.00 0.00 C       |
| ATOM 3 O ACE 1 27.217 18.952 34.439 1.00 0.00 O     | ATOM 62 O GLY 8 19.564 22.748 23.317 1.00 0.00 O       |
| ATOM 4 N ILE 2 27.001 18.202 32.347 1.00 0.00 N     | ATOM 63 N LYS 9 21.215 23.189 24.785 1.00 0.00 N       |
| ATOM 5 CA ILE 2 27.340 19.479 31.749 1.00 0.00 C    | ATOM 64 CA LYS 9 21.202 24.619 24.551 1.00 0.00 C      |
| ATOM 6 CB ILE 2 28.743 19.888 32.187 1.00 0.00 C    | ATOM 65 CB LYS 9 22.244 25.326 25.410 1.00 0.00 C      |
| ATOM 7 CG2 ILE 2 29.745 18.831 31.733 1.00 0.00 C   | ATOM 66 CG LYS 9 22.197 26.826 25.134 1.00 0.00 C      |
| ATOM 8 CG1 ILE 2 29.100 21.230 31.559 1.00 0.00 C   | ATOM 67 CD LYS 9 23.239 27.533 25.995 1.00 0.00 C      |
| ATOM 9 CD1 ILE 2 30.502 21.640 31.996 1.00 0.00 C   | ATOM 68 CE LYS 9 23.193 29.033 25.718 1.00 0.00 C      |
| ATOM 10 C ILE 2 27.307 19.399 30.230 1.00 0.00 C    | ATOM 69 NZ LYS 9 24.197 29.714 26.547 1.00 0.00 NI+    |
| ATOM 11 O ILE 2 26.765 20.282 29.571 1.00 0.00 O    | ATOM 70 C LYS 9 21.506 24.938 23.094 1.00 0.00 C       |
| ATOM 12 N ASN 3 27.891 18.334 29.675 1.00 0.00 N    | ATOM 71 O LYS 9 20.835 25.767 22.483 1.00 0.00 O       |
| ATOM 13 CA ASN 3 27.927 18.143 28.239 1.00 0.00 C   | ATOM 72 N MET 10 22.523 24.276 22.537 1.00 0.00 N      |
| ATOM 14 CB ASN 3 28.651 16.850 27.875 1.00 0.00 C   | ATOM 73 CA MET 10 22.913 24.491 21.158 1.00 0.00 C     |
| ATOM 15 CG ASN 3 28.689 16.649 26.367 1.00 0.00 C   | ATOM 74 CB MET 10 24.099 23.611 20.780 1.00 0.00 C     |
| ATOM 16 OD1 ASN 3 28.175 17.475 25.615 1.00 0.00 O  | ATOM 75 CG MET 10 24.477 23.866 19.324 1.00 0.00 C     |
| ATOM 17 ND2 ASN 3 29.300 15.547 25.926 1.00 0.00 N  | ATOM 76 SD MET 10 25.885 22.827 18.859 1.00 0.00 S     |
| ATOM 18 C ASN 3 26.520 18.066 27.661 1.00 0.00 C    | ATOM 77 CE MET 10 26.092 23.328 17.163 1.00 0.00 C     |
| ATOM 19 O ASN 3 26.232 18.686 26.640 1.00 0.00 O    | ATOM 78 C MET 10 21.769 24.164 20.208 1.00 0.00 C      |
| ATOM 20 N TRP 4 25.645 17.303 28.319 1.00 0.00 N    | ATOM 79 O MET 10 21.495 24.919 19.278 1.00 0.00 O      |
| ATOM 21 CA TRP 4 24.277 17.148 27.870 1.00 0.00 C   | ATOM 80 N VAL 11 21.101 23.032 20.445 1.00 0.00 N      |
| ATOM 22 CB TRP 4 23.495 16.226 28.799 1.00 0.00 C   | ATOM 81 CA VAL 11 19.992 22.610 19.613 1.00 0.00 C     |
| ATOM 23 CG TRP 4 22.053 16.002 28.413 1.00 0.00 C   | ATOM 82 CB VAL 11 19.411 21.288 20.103 1.00 0.00 C     |
| ATOM 24 CD1 TRP 4 21.154 15.243 29.053 1.00 0.00 C  | ATOM 83 CG1 VAL 11 18.911 21.452 21.536 1.00 0.00 C    |
| ATOM 25 NE1 TRP 4 19.928 15.336 28.321 1.00 0.00 N  | ATOM 84 CG2 VAL 11 18.250 20.879 19.204 1.00 0.00 C    |
| ATOM 26 CE2 TRP 4 20.108 16.124 27.289 1.00 0.00 C  | ATOM 85 C VAL 11 18.874 23.642 19.624 1.00 0.00 C      |
| ATOM 27 CZ2 TRP 4 19.174 16.491 26.312 1.00 0.00 C  | ATOM 86 O VAL 11 18.325 23.978 18.577 1.00 0.00 O      |
| ATOM 28 CH2 TRP 4 19.635 17.347 25.321 1.00 0.00 C  | ATOM 87 N ILE 12 18.538 24.147 20.814 1.00 0.00 N      |
| ATOM 29 CZ3 TRP 4 20.912 17.786 25.319 1.00 0.00 C  | ATOM 88 CA ILE 12 17.489 25.136 20.958 1.00 0.00 C     |
| ATOM 30 CE3 TRP 4 21.835 17.404 26.314 1.00 0.00 C  | ATOM 89 CB ILE 12 17.342 25.512 22.428 1.00 0.00 C     |
| ATOM 31 CD2 TRP 4 21.370 16.541 27.314 1.00 0.00 C  | ATOM 90 CG2 ILE 12 18.659 26.087 22.940 1.00 0.00 C    |
| ATOM 32 C TRP 4 23.556 18.489 27.833 1.00 0.00 C    | ATOM 91 CG1 ILE 12 16.239 26.554 22.579 1.00 0.00 C    |
| ATOM 33 O TRP 4 22.862 18.797 26.867 1.00 0.00 O    | ATOM 92 CD1 ILE 12 16.091 26.928 24.050 1.00 0.00 C    |
| ATOM 34 N LEU 5 23.726 19.287 28.889 1.00 0.00 N    | ATOM 93 C ILE 12 17.812 26.395 20.164 1.00 0.00 C      |
| ATOM 35 CA LEU 5 23.095 20.588 28.974 1.00 0.00 C   | ATOM 94 O ILE 12 16.950 26.934 19.472 1.00 0.00 O      |
| ATOM 36 CB LEU 5 23.454 21.289 30.281 1.00 0.00 C   | ATOM 95 N ASP 13 19.057 26.862 20.265 1.00 0.00 N      |
| ATOM 37 CG LEU 5 22.772 22.652 30.330 1.00 0.00 C   | ATOM 96 CA ASP 13 19.489 28.052 19.559 1.00 0.00 C     |
| ATOM 38 CD1 LEU 5 21.260 22.467 30.252 1.00 0.00 C  | ATOM 97 CB ASP 13 20.953 28.363 19.850 1.00 0.00 C     |
| ATOM 39 CD2 LEU 5 23.130 23.352 31.637 1.00 0.00 C  | ATOM 98 CG ASP 13 21.368 29.620 19.090 1.00 0.00 C     |
| ATOM 40 C LEU 5 23.536 21.487 27.828 1.00 0.00 C    | ATOM 99 OD1 ASP 13 21.217 30.724 19.677 1.00 0.00 O    |
| ATOM 41 O LEU 5 22.713 22.157 27.207 1.00 0.00 O    | ATOM 100 OD2 ASP 13 21.831 29.465 17.928 1.00 0.00 OI- |
| ATOM 42 N LYS 6 24.842 21.501 27.548 1.00 0.00 N    | ATOM 101 C ASP 13 19.340 27.880 18.054 1.00 0.00 C     |
| ATOM 43 CA LYS 6 25.387 22.316 26.480 1.00 0.00 C   | ATOM 102 O ASP 13 18.850 28.776 17.370 1.00 0.00 O     |
| ATOM 44 CB LYS 6 26.898 22.144 26.377 1.00 0.00 C   | ATOM 103 N ALA 14 19.765 26.724 17.539 1.00 0.00 N     |
| ATOM 45 CG LYS 6 27.433 23.015 25.245 1.00 0.00 C   | ATOM 104 CA ALA 14 19.677 26.439 16.121 1.00 0.00 C    |
| ATOM 46 CD LYS 6 28.945 22.844 25.142 1.00 0.00 C   | ATOM 105 CB ALA 14 20.230 25.054 15.804 1.00 0.00 C    |
| ATOM 47 CE LYS 6 29.479 23.715 24.009 1.00 0.00 C   | ATOM 106 C ALA 14 18.234 26.485 15.642 1.00 0.00 C     |
| ATOM 48 NZ LYS 6 30.936 23.550 23.909 1.00 0.00 NI+ | ATOM 107 O ALA 14 17.941 27.067 14.598 1.00 0.00 O     |
| ATOM 49 C LYS 6 24.783 21.934 25.137 1.00 0.00 C    | ATOM 108 N LEU 15 17.330 25.867 16.405 1.00 0.00 N     |
| ATOM 50 O LYS 6 24.406 22.803 24.353 1.00 0.00 O    | ATOM 109 CA LEU 15 15.923 25.839 16.056 1.00 0.00 C    |
| ATOM 51 N LEU 7 24.691 20.629 24.872 1.00 0.00 N    | ATOM 110 CB LEU 15 15.116 25.071 17.098 1.00 0.00 C    |
| ATOM 52 CA LEU 7 24.135 20.137 23.627 1.00 0.00 C   | ATOM 111 CG LEU 15 13.645 25.064 16.694 1.00 0.00 C    |
| ATOM 53 CB LEU 7 24.150 18.613 23.583 1.00 0.00 C   | ATOM 112 CD1 LEU 15 13.492 24.391 15.335 1.00 0.00 C   |
| ATOM 54 CG LEU 7 23.557 18.137 22.261 1.00 0.00 C   | ATOM 113 CD2 LEU 15 12.836 24.296 17.734 1.00 0.00 C   |
| ATOM 55 CD1 LEU 7 24.386 18.687 21.105 1.00 0.00 C  | ATOM 114 C LEU 15 15.352 27.248 15.971 1.00 0.00 C     |
| ATOM 56 CD2 LEU 7 23.571 16.613 22.217 1.00 0.00 C  | ATOM 115 O LEU 15 16.066 28.224 16.186 1.00 0.00 O     |
| ATOM 57 C LEU 7 22.693 20.594 23.454 1.00 0.00 C    | ATOM 116 N NHE 16 14.059 27.349 15.655 1.00 0.00 N     |
| ATOM 58 O LEU 7 22.306 21.040 22.376 1.00 0.00 O    | TER 117 NHE 16                                         |
| ATOM 59 N GLY 8 21.898 20.482 24.520 1.00 0.00 N    |                                                        |

## ID2 extended

|                                                      |                                                      |
|------------------------------------------------------|------------------------------------------------------|
| ATOM 1 CH3 ACE 1 13.222 26.065 31.411 1.00 0.00 C    | ATOM 55 CA TRP 8 23.740 27.500 20.661 1.00 0.00 C    |
| ATOM 2 C ACE 1 14.552 26.714 31.111 1.00 0.00 C      | ATOM 56 CB TRP 8 24.375 28.799 21.235 1.00 0.00 C    |
| ATOM 3 O ACE 1 14.553 27.931 31.039 1.00 0.00 O      | ATOM 57 CG TRP 8 24.988 28.704 22.611 1.00 0.00 C    |
| ATOM 4 N THR 2 15.678 25.915 30.996 1.00 0.00 N      | ATOM 58 CD1 TRP 8 24.302 28.873 23.796 1.00 0.00 C   |
| ATOM 5 CA THR 2 16.998 26.489 31.117 1.00 0.00 C     | ATOM 59 NE1 TRP 8 25.204 28.736 24.869 1.00 0.00 N   |
| ATOM 6 CB THR 2 17.772 25.953 32.302 1.00 0.00 C     | ATOM 60 CE2 TRP 8 26.508 28.604 24.468 1.00 0.00 C   |
| ATOM 7 CG2 THR 2 17.217 26.475 33.624 1.00 0.00 C    | ATOM 61 CZ2 TRP 8 27.720 28.626 25.174 1.00 0.00 C   |
| ATOM 8 OG1 THR 2 17.722 24.554 32.326 1.00 0.00 O    | ATOM 62 CH2 TRP 8 28.897 28.381 24.433 1.00 0.00 C   |
| ATOM 9 C THR 2 17.865 26.303 29.812 1.00 0.00 C      | ATOM 63 CZ3 TRP 8 28.883 28.375 23.002 1.00 0.00 C   |
| ATOM 10 O THR 2 19.035 26.728 29.766 1.00 0.00 O     | ATOM 64 CE3 TRP 8 27.612 28.428 22.276 1.00 0.00 C   |
| ATOM 11 N ARG 3 17.294 25.576 28.836 1.00 0.00 N     | ATOM 65 CD2 TRP 8 26.394 28.540 23.036 1.00 0.00 C   |
| ATOM 12 CA ARG 3 17.885 25.182 27.572 1.00 0.00 C    | ATOM 66 C TRP 8 24.820 26.595 20.048 1.00 0.00 C     |
| ATOM 13 CB ARG 3 16.815 24.603 26.546 1.00 0.00 C    | ATOM 67 O TRP 8 25.238 26.937 18.981 1.00 0.00 O     |
| ATOM 14 CG ARG 3 17.129 24.545 25.064 1.00 0.00 C    | ATOM 68 N ASN 9 25.169 25.435 20.597 1.00 0.00 N     |
| ATOM 15 CD ARG 3 16.049 23.762 24.268 1.00 0.00 C    | ATOM 69 CA ASN 9 26.307 24.535 20.294 1.00 0.00 C    |
| ATOM 16 NE ARG 3 16.149 23.956 22.804 1.00 0.00 N    | ATOM 70 CB ASN 9 27.209 24.355 21.513 1.00 0.00 C    |
| ATOM 17 CZ ARG 3 15.218 23.928 21.920 1.00 0.00 C    | ATOM 71 CG ASN 9 28.647 23.745 21.302 1.00 0.00 C    |
| ATOM 18 NH1 ARG 3 14.077 23.420 22.201 1.00 0.00 N   | ATOM 72 OD1 ASN 9 28.811 22.921 20.381 1.00 0.00 O   |
| ATOM 19 NH2 ARG 3 15.457 24.172 20.636 1.00 0.00 N1+ | ATOM 73 ND2 ASN 9 29.622 24.022 22.161 1.00 0.00 N   |
| ATOM 20 C ARG 3 18.688 26.255 26.904 1.00 0.00 C     | ATOM 74 C ASN 9 25.772 23.226 19.765 1.00 0.00 C     |
| ATOM 21 O ARG 3 19.667 25.948 26.143 1.00 0.00 O     | ATOM 75 O ASN 9 24.670 22.820 20.075 1.00 0.00 O     |
| ATOM 22 N THR 4 18.323 27.466 27.025 1.00 0.00 N     | ATOM 76 N LYS 10 26.376 22.549 18.739 1.00 0.00 N    |
| ATOM 23 CA THR 4 18.887 28.685 26.440 1.00 0.00 C    | ATOM 77 CA LYS 10 25.872 21.387 18.027 1.00 0.00 C   |
| ATOM 24 CB THR 4 18.017 29.900 26.599 1.00 0.00 C    | ATOM 78 CB LYS 10 26.685 21.301 16.726 1.00 0.00 C   |
| ATOM 25 CG2 THR 4 16.758 29.621 25.755 1.00 0.00 C   | ATOM 79 CG LYS 10 26.429 22.467 15.736 1.00 0.00 C   |
| ATOM 26 OG1 THR 4 17.703 30.140 27.949 1.00 0.00 O   | ATOM 80 CD LYS 10 24.960 22.724 15.329 1.00 0.00 C   |
| ATOM 27 C THR 4 20.275 29.015 26.903 1.00 0.00 C     | ATOM 81 CE LYS 10 25.086 23.323 13.904 1.00 0.00 C   |
| ATOM 28 O THR 4 20.959 29.780 26.268 1.00 0.00 O     | ATOM 82 NZ LYS 10 23.880 23.605 13.058 1.00 0.00 N1+ |
| ATOM 29 N LYS 5 20.761 28.396 28.041 1.00 0.00 N     | ATOM 83 C LYS 10 25.908 20.066 18.812 1.00 0.00 C    |
| ATOM 30 CA LYS 5 22.203 28.378 28.431 1.00 0.00 C    | ATOM 84 O LYS 10 25.331 19.126 18.305 1.00 0.00 O    |
| ATOM 31 CB LYS 5 22.211 27.615 29.805 1.00 0.00 C    | ATOM 85 N ILE 11 26.463 20.017 20.019 1.00 0.00 N    |
| ATOM 32 CG LYS 5 23.558 27.723 30.610 1.00 0.00 C    | ATOM 86 CA ILE 11 26.342 18.857 20.958 1.00 0.00 C   |
| ATOM 33 CD LYS 5 23.450 26.878 31.862 1.00 0.00 C    | ATOM 87 CB ILE 11 27.651 17.950 20.966 1.00 0.00 C   |
| ATOM 34 CE LYS 5 24.629 27.098 32.825 1.00 0.00 C    | ATOM 88 CG2 ILE 11 27.935 17.430 19.542 1.00 0.00 C  |
| ATOM 35 NZ LYS 5 24.242 26.493 34.084 1.00 0.00 N1+  | ATOM 89 CG1 ILE 11 28.840 18.735 21.601 1.00 0.00 C  |
| ATOM 36 C LYS 5 23.149 27.648 27.436 1.00 0.00 C     | ATOM 90 CD1 ILE 11 30.112 17.953 21.669 1.00 0.00 C  |
| ATOM 37 O LYS 5 24.301 28.047 27.416 1.00 0.00 O     | ATOM 91 C ILE 11 26.049 19.145 22.406 1.00 0.00 C    |
| ATOM 38 N ILE 6 22.689 26.587 26.722 1.00 0.00 N     | ATOM 92 O ILE 11 26.286 20.216 22.931 1.00 0.00 O    |
| ATOM 39 CA ILE 6 23.528 25.672 25.937 1.00 0.00 C    | ATOM 93 N LEU 12 25.620 18.137 23.159 1.00 0.00 N    |
| ATOM 40 CB ILE 6 23.894 24.424 26.679 1.00 0.00 C    | ATOM 94 CA LEU 12 25.164 18.135 24.560 1.00 0.00 C   |
| ATOM 41 CG2 ILE 6 24.869 24.742 27.824 1.00 0.00 C   | ATOM 95 CB LEU 12 26.412 18.148 25.518 1.00 0.00 C   |
| ATOM 42 CG1 ILE 6 22.648 23.565 27.082 1.00 0.00 C   | ATOM 96 CG LEU 12 27.374 16.945 25.295 1.00 0.00 C   |
| ATOM 43 CD1 ILE 6 22.973 22.344 27.961 1.00 0.00 C   | ATOM 97 CD1 LEU 12 28.547 16.799 26.319 1.00 0.00 C  |
| ATOM 44 C ILE 6 23.013 25.336 24.458 1.00 0.00 C     | ATOM 98 CD2 LEU 12 26.602 15.719 25.527 1.00 0.00 C  |
| ATOM 45 O ILE 6 23.640 24.680 23.647 1.00 0.00 O     | ATOM 99 C LEU 12 24.055 19.205 24.823 1.00 0.00 C    |
| ATOM 46 N ASP 7 21.852 25.897 24.093 1.00 0.00 N     | ATOM 100 O LEU 12 24.036 19.711 25.916 1.00 0.00 O   |
| ATOM 47 CA ASP 7 21.087 25.653 22.851 1.00 0.00 C    | ATOM 101 N SER 13 23.197 19.391 23.849 1.00 0.00 N   |
| ATOM 48 CB ASP 7 19.771 26.458 22.915 1.00 0.00 C    | ATOM 102 CA SER 13 22.150 20.461 23.861 1.00 0.00 C  |
| ATOM 49 CG ASP 7 18.715 26.129 21.862 1.00 0.00 C    | ATOM 103 CB SER 13 22.482 21.594 22.955 1.00 0.00 C  |
| ATOM 50 OD1 ASP 7 18.220 27.031 21.191 1.00 0.00 O   | ATOM 104 OG SER 13 22.939 21.051 21.715 1.00 0.00 O  |
| ATOM 51 OD2 ASP 7 18.459 24.927 21.719 1.00 0.00 O1- | ATOM 105 C SER 13 20.741 19.884 23.559 1.00 0.00 C   |
| ATOM 52 C ASP 7 21.915 26.000 21.564 1.00 0.00 C     | ATOM 106 O SER 13 19.835 20.665 23.294 1.00 0.00 O   |
| ATOM 53 O ASP 7 21.654 25.472 20.466 1.00 0.00 O     | ATOM 107 N NHE 14 20.601 18.541 23.322 1.00 0.00 N   |
| ATOM 54 N TRP 8 22.873 26.897 21.686 1.00 0.00 N     | TER 108 NHE 14                                       |

## ID2 misfolded

|                                                      |                                                      |
|------------------------------------------------------|------------------------------------------------------|
| ATOM 1 CH3 ACE 1 23.745 18.437 32.753 1.00 0.00 C    | ATOM 55 CA TRP 8 18.051 21.298 22.355 1.00 0.00 C    |
| ATOM 2 C ACE 1 24.121 19.761 32.084 1.00 0.00 C      | ATOM 56 CB TRP 8 17.318 21.223 23.690 1.00 0.00 C    |
| ATOM 3 O ACE 1 24.322 20.768 32.761 1.00 0.00 O      | ATOM 57 CG TRP 8 15.854 21.587 23.636 1.00 0.00 C    |
| ATOM 4 N THR 2 24.212 19.756 30.774 1.00 0.00 N      | ATOM 58 CD1 TRP 8 14.988 21.604 24.659 1.00 0.00 C   |
| ATOM 5 CA THR 2 24.561 20.953 30.034 1.00 0.00 C     | ATOM 59 NE1 TRP 8 13.724 22.010 24.130 1.00 0.00 N   |
| ATOM 6 CB THR 2 25.934 21.473 30.449 1.00 0.00 C     | ATOM 60 CE2 TRP 8 13.848 22.223 22.842 1.00 0.00 C   |
| ATOM 7 CG2 THR 2 25.923 21.804 31.938 1.00 0.00 C    | ATOM 61 CZ2 TRP 8 12.862 22.633 21.937 1.00 0.00 C   |
| ATOM 8 OG1 THR 2 26.922 20.471 30.191 1.00 0.00 O    | ATOM 62 CH2 TRP 8 13.271 22.784 20.617 1.00 0.00 C   |
| ATOM 9 C THR 2 24.600 20.681 28.538 1.00 0.00 C      | ATOM 63 CZ3 TRP 8 14.548 22.543 20.253 1.00 0.00 C   |
| ATOM 10 O THR 2 24.077 21.464 27.748 1.00 0.00 O     | ATOM 64 CE3 TRP 8 15.526 22.131 21.183 1.00 0.00 C   |
| ATOM 11 N ARG 3 25.222 19.566 28.148 1.00 0.00 N     | ATOM 65 CD2 TRP 8 15.113 21.979 22.513 1.00 0.00 C   |
| ATOM 12 CA ARG 3 25.327 19.196 26.751 1.00 0.00 C    | ATOM 66 C TRP 8 17.910 22.718 21.826 1.00 0.00 C     |
| ATOM 13 CB ARG 3 26.084 17.882 26.587 1.00 0.00 C    | ATOM 67 O TRP 8 17.115 22.972 20.926 1.00 0.00 O     |
| ATOM 14 CG ARG 3 26.172 17.529 25.106 1.00 0.00 C    | ATOM 68 N ASN 9 18.688 23.645 22.390 1.00 0.00 N     |
| ATOM 15 CD ARG 3 26.930 16.215 24.942 1.00 0.00 C    | ATOM 69 CA ASN 9 18.648 25.033 21.975 1.00 0.00 C    |
| ATOM 16 NE ARG 3 27.035 15.838 23.515 1.00 0.00 N    | ATOM 70 CB ASN 9 19.634 25.875 22.779 1.00 0.00 C    |
| ATOM 17 CZ ARG 3 27.649 14.735 23.100 1.00 0.00 C    | ATOM 71 CG ASN 9 19.593 27.332 22.344 1.00 0.00 C    |
| ATOM 18 NH1 ARG 3 28.217 13.883 23.949 1.00 0.00 N   | ATOM 72 OD1 ASN 9 18.831 27.695 21.449 1.00 0.00 O   |
| ATOM 19 NH2 ARG 3 27.685 14.493 21.792 1.00 0.00 N1+ | ATOM 73 ND2 ASN 9 20.416 28.170 22.978 1.00 0.00 N   |
| ATOM 20 C ARG 3 23.950 19.021 26.127 1.00 0.00 C     | ATOM 74 C ASN 9 19.008 25.175 20.503 1.00 0.00 C     |
| ATOM 21 O ARG 3 23.700 19.500 25.023 1.00 0.00 O     | ATOM 75 O ASN 9 18.343 25.901 19.766 1.00 0.00 O     |
| ATOM 22 N THR 4 23.055 18.329 26.837 1.00 0.00 N     | ATOM 76 N LYS 10 20.065 24.480 20.076 1.00 0.00 N    |
| ATOM 23 CA THR 4 21.711 18.093 26.351 1.00 0.00 C    | ATOM 77 CA LYS 10 20.508 24.532 18.697 1.00 0.00 C   |
| ATOM 24 CB THR 4 20.899 17.281 27.355 1.00 0.00 C    | ATOM 78 CB LYS 10 21.731 23.647 18.481 1.00 0.00 C   |
| ATOM 25 CG2 THR 4 21.578 15.935 27.586 1.00 0.00 C   | ATOM 79 CG LYS 10 22.166 23.728 17.021 1.00 0.00 C   |
| ATOM 26 OG1 THR 4 20.821 17.994 28.593 1.00 0.00 O   | ATOM 80 CD LYS 10 23.389 22.844 16.805 1.00 0.00 C   |
| ATOM 27 C THR 4 20.976 19.405 26.113 1.00 0.00 C     | ATOM 81 CE LYS 10 23.823 22.925 15.345 1.00 0.00 C   |
| ATOM 28 O THR 4 20.322 19.575 25.086 1.00 0.00 O     | ATOM 82 NZ LYS 10 25.002 22.073 15.136 1.00 0.00 N1+ |
| ATOM 29 N LYS 5 21.086 20.333 27.066 1.00 0.00 N     | ATOM 83 C LYS 10 19.415 24.053 17.752 1.00 0.00 C    |
| ATOM 30 CA LYS 5 20.434 21.622 26.956 1.00 0.00 C    | ATOM 84 O LYS 10 19.162 24.676 16.724 1.00 0.00 O    |
| ATOM 31 CB LYS 5 20.723 22.489 28.178 1.00 0.00 C    | ATOM 85 N ILE 11 18.766 22.940 18.104 1.00 0.00 N    |
| ATOM 32 CG LYS 5 20.021 23.834 28.024 1.00 0.00 C    | ATOM 86 CA ILE 11 17.705 22.383 17.289 1.00 0.00 C   |
| ATOM 33 CD LYS 5 20.310 24.701 29.246 1.00 0.00 C    | ATOM 87 CB ILE 11 17.165 21.121 17.953 1.00 0.00 C   |
| ATOM 34 CE LYS 5 19.609 26.046 29.093 1.00 0.00 C    | ATOM 88 CG2 ILE 11 16.616 21.467 19.333 1.00 0.00 C  |
| ATOM 35 NZ LYS 5 19.888 26.881 30.271 1.00 0.00 N1+  | ATOM 89 CG1 ILE 11 16.048 20.534 17.095 1.00 0.00 C  |
| ATOM 36 C LYS 5 20.916 22.378 25.726 1.00 0.00 C     | ATOM 90 CD1 ILE 11 15.507 19.272 17.759 1.00 0.00 C  |
| ATOM 37 O LYS 5 20.114 22.948 24.990 1.00 0.00 O     | ATOM 91 C ILE 11 16.561 23.374 17.125 1.00 0.00 C    |
| ATOM 38 N ILE 6 22.232 22.381 25.504 1.00 0.00 N     | ATOM 92 O ILE 11 16.050 23.559 16.023 1.00 0.00 O    |
| ATOM 39 CA ILE 6 22.816 23.065 24.367 1.00 0.00 C    | ATOM 93 N LEU 12 16.161 24.014 18.226 1.00 0.00 N    |
| ATOM 40 CB ILE 6 24.330 22.887 24.389 1.00 0.00 C    | ATOM 94 CA LEU 12 15.084 24.981 18.201 1.00 0.00 C   |
| ATOM 41 CG2 ILE 6 24.668 21.402 24.319 1.00 0.00 C   | ATOM 95 CB LEU 12 14.832 25.559 19.590 1.00 0.00 C   |
| ATOM 42 CG1 ILE 6 24.944 23.606 23.193 1.00 0.00 C   | ATOM 96 CG LEU 12 13.692 26.570 19.520 1.00 0.00 C   |
| ATOM 43 CD1 ILE 6 26.459 23.428 23.215 1.00 0.00 C   | ATOM 97 CD1 LEU 12 12.429 25.879 19.020 1.00 0.00 C  |
| ATOM 44 C ILE 6 22.279 22.505 23.058 1.00 0.00 C     | ATOM 98 CD2 LEU 12 13.440 27.147 20.909 1.00 0.00 C  |
| ATOM 45 O ILE 6 21.927 23.261 22.154 1.00 0.00 O     | ATOM 99 C LEU 12 15.408 26.138 17.268 1.00 0.00 C    |
| ATOM 46 N ASP 7 22.217 21.175 22.957 1.00 0.00 N     | ATOM 100 O LEU 12 14.565 26.560 16.480 1.00 0.00 O   |
| ATOM 47 CA ASP 7 21.725 20.520 21.761 1.00 0.00 C    | ATOM 101 N SER 13 16.637 26.653 17.358 1.00 0.00 N   |
| ATOM 48 CB ASP 7 21.762 19.003 21.912 1.00 0.00 C    | ATOM 102 CA SER 13 17.068 27.758 16.524 1.00 0.00 C  |
| ATOM 49 CG ASP 7 21.237 18.352 20.634 1.00 0.00 C    | ATOM 103 CB SER 13 18.510 28.146 16.832 1.00 0.00 C  |
| ATOM 50 OD1 ASP 7 22.078 18.090 19.734 1.00 0.00 O   | ATOM 104 OG SER 13 18.899 29.236 15.992 1.00 0.00 O  |
| ATOM 51 OD2 ASP 7 19.999 18.123 20.571 1.00 0.00 O1- | ATOM 105 C SER 13 16.988 27.393 15.048 1.00 0.00 C   |
| ATOM 52 C ASP 7 20.287 20.924 21.468 1.00 0.00 C     | ATOM 106 O SER 13 16.596 26.282 14.701 1.00 0.00 O   |
| ATOM 53 O ASP 7 19.944 21.223 20.326 1.00 0.00 O     | ATOM 107 N NHE 14 17.359 28.328 14.175 1.00 0.00 N   |
| ATOM 54 N TRP 8 19.445 20.932 22.504 1.00 0.00 N     | TER 108 NHE 14                                       |

## ID3 extended

|                                                      |                                                        |
|------------------------------------------------------|--------------------------------------------------------|
| ATOM 1 CH3 ACE 1 17.825 17.213 28.169 1.00 0.00 C    | ATOM 59 NZ LYS 8 23.204 23.661 15.584 1.00 0.00 N1+    |
| ATOM 2 C ACE 1 18.367 18.323 27.318 1.00 0.00 C      | ATOM 60 C LYS 8 25.702 26.401 21.164 1.00 0.00 C       |
| ATOM 3 O ACE 1 19.273 19.060 27.703 1.00 0.00 O      | ATOM 61 O LYS 8 25.267 27.356 21.819 1.00 0.00 O       |
| ATOM 4 N SER 2 17.788 18.481 26.134 1.00 0.00 N      | ATOM 62 N LEU 9 26.882 26.396 20.613 1.00 0.00 N       |
| ATOM 5 CA SER 2 18.089 19.569 25.113 1.00 0.00 C     | ATOM 63 CA LEU 9 28.032 27.280 21.042 1.00 0.00 C      |
| ATOM 6 CB SER 2 17.361 20.849 25.531 1.00 0.00 C     | ATOM 64 CB LEU 9 29.303 26.952 20.149 1.00 0.00 C      |
| ATOM 7 OG SER 2 16.024 20.651 25.918 1.00 0.00 O     | ATOM 65 CG LEU 9 30.503 27.793 20.655 1.00 0.00 C      |
| ATOM 8 C SER 2 19.528 19.905 24.749 1.00 0.00 C      | ATOM 66 CD1 LEU 9 30.931 27.435 22.109 1.00 0.00 C     |
| ATOM 9 O SER 2 19.853 21.071 24.400 1.00 0.00 O      | ATOM 67 CD2 LEU 9 31.721 27.497 19.770 1.00 0.00 C     |
| ATOM 10 N THR 3 20.431 18.979 24.992 1.00 0.00 N     | ATOM 68 C LEU 9 27.577 28.760 21.024 1.00 0.00 C       |
| ATOM 11 CA THR 3 21.866 19.085 24.794 1.00 0.00 C    | ATOM 69 O LEU 9 27.792 29.558 21.964 1.00 0.00 O       |
| ATOM 12 CB THR 3 22.591 17.842 25.360 1.00 0.00 C    | ATOM 70 N MET 10 26.896 29.133 19.947 1.00 0.00 N      |
| ATOM 13 CG2 THR 3 23.126 18.165 26.781 1.00 0.00 C   | ATOM 71 CA MET 10 26.634 30.548 19.704 1.00 0.00 C     |
| ATOM 14 OG1 THR 3 21.627 16.762 25.474 1.00 0.00 O   | ATOM 72 CB MET 10 26.488 30.744 18.194 1.00 0.00 C     |
| ATOM 15 C THR 3 22.215 19.193 23.333 1.00 0.00 C     | ATOM 73 CG MET 10 25.200 30.518 17.482 1.00 0.00 C     |
| ATOM 16 O THR 3 23.247 19.723 22.980 1.00 0.00 O     | ATOM 74 SD MET 10 24.587 28.810 17.748 1.00 0.00 S     |
| ATOM 17 N SER 4 21.266 18.785 22.476 1.00 0.00 N     | ATOM 75 CE MET 10 23.371 28.664 16.409 1.00 0.00 C     |
| ATOM 18 CA SER 4 21.449 18.876 21.020 1.00 0.00 C    | ATOM 76 C MET 10 25.470 31.133 20.481 1.00 0.00 C      |
| ATOM 19 CB SER 4 21.109 17.517 20.406 1.00 0.00 C    | ATOM 77 O MET 10 25.203 32.311 20.464 1.00 0.00 O      |
| ATOM 20 OG SER 4 19.802 17.093 20.777 1.00 0.00 O    | ATOM 78 N PHE 11 24.745 30.232 21.208 1.00 0.00 N      |
| ATOM 21 C SER 4 20.653 20.077 20.462 1.00 0.00 C     | ATOM 79 CA PHE 11 23.726 30.528 22.167 1.00 0.00 C     |
| ATOM 22 O SER 4 20.945 20.482 19.327 1.00 0.00 O     | ATOM 80 CB PHE 11 22.539 29.663 21.832 1.00 0.00 C     |
| ATOM 23 N ARG 5 19.615 20.624 21.178 1.00 0.00 N     | ATOM 81 CG PHE 11 21.243 30.054 22.546 1.00 0.00 C     |
| ATOM 24 CA ARG 5 18.691 21.682 20.688 1.00 0.00 C    | ATOM 82 CD1 PHE 11 20.920 29.527 23.863 1.00 0.00 C    |
| ATOM 25 CB ARG 5 17.295 21.468 21.069 1.00 0.00 C    | ATOM 83 CE1 PHE 11 19.755 29.887 24.482 1.00 0.00 C    |
| ATOM 26 CG ARG 5 16.512 20.442 20.216 1.00 0.00 C    | ATOM 84 CZ PHE 11 18.859 30.773 23.878 1.00 0.00 C     |
| ATOM 27 CD ARG 5 15.100 20.208 20.833 1.00 0.00 C    | ATOM 85 CE2 PHE 11 19.090 31.236 22.541 1.00 0.00 C    |
| ATOM 28 NE ARG 5 14.450 19.116 20.129 1.00 0.00 N    | ATOM 86 CD2 PHE 11 20.331 30.956 21.957 1.00 0.00 C    |
| ATOM 29 CZ ARG 5 13.493 18.323 20.541 1.00 0.00 C    | ATOM 87 C PHE 11 24.206 30.442 23.606 1.00 0.00 C      |
| ATOM 30 NH1 ARG 5 12.903 18.431 21.677 1.00 0.00 N   | ATOM 88 O PHE 11 23.583 31.042 24.506 1.00 0.00 O      |
| ATOM 31 NH2 ARG 5 13.010 17.245 19.861 1.00 0.00 N1+ | ATOM 89 N LYS 12 25.365 29.853 23.914 1.00 0.00 N      |
| ATOM 32 C ARG 5 19.138 23.092 21.072 1.00 0.00 C     | ATOM 90 CA LYS 12 25.798 29.491 25.267 1.00 0.00 C     |
| ATOM 33 O ARG 5 19.426 23.902 20.143 1.00 0.00 O     | ATOM 91 CB LYS 12 27.080 28.659 25.129 1.00 0.00 C     |
| ATOM 34 N HIE 6 19.230 23.412 22.374 1.00 0.00 N     | ATOM 92 CG LYS 12 27.297 27.829 26.408 1.00 0.00 C     |
| ATOM 35 CA HIE 6 19.394 24.748 22.894 1.00 0.00 C    | ATOM 93 CD LYS 12 28.567 27.006 26.466 1.00 0.00 C     |
| ATOM 36 CB HIE 6 18.519 24.806 24.162 1.00 0.00 C    | ATOM 94 CE LYS 12 28.902 26.684 27.946 1.00 0.00 C     |
| ATOM 37 CG HIE 6 17.049 24.720 23.999 1.00 0.00 C    | ATOM 95 NZ LYS 12 29.613 25.394 28.181 1.00 0.00 N1+   |
| ATOM 38 ND1 HIE 6 16.295 23.735 24.717 1.00 0.00 N   | ATOM 96 C LYS 12 25.980 30.760 26.136 1.00 0.00 C      |
| ATOM 39 CE1 HIE 6 15.016 24.021 24.611 1.00 0.00 C   | ATOM 97 O LYS 12 25.916 30.586 27.324 1.00 0.00 O      |
| ATOM 40 NE2 HIE 6 14.921 25.050 23.709 1.00 0.00 N   | ATOM 98 N THR 13 26.226 31.953 25.611 1.00 0.00 N      |
| ATOM 41 CD2 HIE 6 16.184 25.595 23.404 1.00 0.00 C   | ATOM 99 CA THR 13 26.376 33.166 26.370 1.00 0.00 C     |
| ATOM 42 C HIE 6 20.799 25.127 23.394 1.00 0.00 C     | ATOM 100 CB THR 13 27.227 34.110 25.537 1.00 0.00 C    |
| ATOM 43 O HIE 6 21.086 26.286 23.405 1.00 0.00 O     | ATOM 101 CG2 THR 13 28.649 33.656 25.380 1.00 0.00 C   |
| ATOM 44 N LYS 7 21.643 24.108 23.745 1.00 0.00 N     | ATOM 102 OG1 THR 13 26.568 34.274 24.233 1.00 0.00 O   |
| ATOM 45 CA LYS 7 22.960 24.275 24.427 1.00 0.00 C    | ATOM 103 C THR 13 25.113 33.969 26.795 1.00 0.00 C     |
| ATOM 46 CB LYS 7 23.188 23.232 25.466 1.00 0.00 C    | ATOM 104 O THR 13 25.074 34.910 27.567 1.00 0.00 O     |
| ATOM 47 CG LYS 7 22.075 23.266 26.560 1.00 0.00 C    | ATOM 105 N GLU 14 23.939 33.577 26.210 1.00 0.00 N     |
| ATOM 48 CD LYS 7 22.225 22.248 27.736 1.00 0.00 C    | ATOM 106 CA GLU 14 22.591 34.079 26.338 1.00 0.00 C    |
| ATOM 49 CE LYS 7 20.904 21.978 28.526 1.00 0.00 C    | ATOM 107 CB GLU 14 21.808 34.089 24.957 1.00 0.00 C    |
| ATOM 50 NZ LYS 7 21.093 20.949 29.594 1.00 0.00 N1+  | ATOM 108 CG GLU 14 22.294 35.114 23.989 1.00 0.00 C    |
| ATOM 51 C LYS 7 24.141 24.523 23.433 1.00 0.00 C     | ATOM 109 CD GLU 14 21.991 36.521 24.361 1.00 0.00 C    |
| ATOM 52 O LYS 7 25.279 24.373 23.894 1.00 0.00 O     | ATOM 110 OE1 GLU 14 22.829 37.437 24.043 1.00 0.00 O   |
| ATOM 53 N LYS 8 23.834 24.967 22.184 1.00 0.00 N     | ATOM 111 OE2 GLU 14 20.912 36.883 24.902 1.00 0.00 O1- |
| ATOM 54 CA LYS 8 24.843 25.137 21.104 1.00 0.00 C    | ATOM 112 C GLU 14 21.882 33.337 27.513 1.00 0.00 C     |
| ATOM 55 CB LYS 8 24.149 25.197 19.752 1.00 0.00 C    | ATOM 113 O GLU 14 22.346 32.349 28.109 1.00 0.00 O     |
| ATOM 56 CG LYS 8 23.241 23.975 19.346 1.00 0.00 C    | ATOM 114 N NHE 15 20.688 33.737 27.917 1.00 0.00 N     |
| ATOM 57 CD LYS 8 22.740 24.293 17.972 1.00 0.00 C    | TER 115 NHE 15                                         |
| ATOM 58 CE LYS 8 23.720 23.958 16.936 1.00 0.00 C    |                                                        |

### ID3 misfolded

|                                                      |                                                        |
|------------------------------------------------------|--------------------------------------------------------|
| ATOM 1 CH3 ACE 1 27.050 19.552 32.630 1.00 0.00 C    | ATOM 59 NZ LYS 8 21.815 29.047 27.549 1.00 0.00 N1+    |
| ATOM 2 C ACE 1 27.280 19.635 31.120 1.00 0.00 C      | ATOM 60 C LYS 8 21.256 24.109 23.393 1.00 0.00 C       |
| ATOM 3 O ACE 1 26.614 20.402 30.428 1.00 0.00 O      | ATOM 61 O LYS 8 20.467 24.772 22.722 1.00 0.00 O       |
| ATOM 4 N SER 2 28.227 18.840 30.616 1.00 0.00 N      | ATOM 62 N LEU 9 22.498 23.833 22.989 1.00 0.00 N       |
| ATOM 5 CA SER 2 28.541 18.826 29.201 1.00 0.00 C     | ATOM 63 CA LEU 9 23.011 24.301 21.717 1.00 0.00 C      |
| ATOM 6 CB SER 2 29.657 17.831 28.896 1.00 0.00 C     | ATOM 64 CB LEU 9 24.451 23.846 21.506 1.00 0.00 C      |
| ATOM 7 OG SER 2 29.938 17.845 27.494 1.00 0.00 O     | ATOM 65 CG LEU 9 24.953 24.356 20.160 1.00 0.00 C      |
| ATOM 8 C SER 2 27.325 18.429 28.375 1.00 0.00 C      | ATOM 66 CD1 LEU 9 24.893 25.880 20.140 1.00 0.00 C     |
| ATOM 9 O SER 2 27.032 19.053 27.357 1.00 0.00 O      | ATOM 67 CD2 LEU 9 26.393 23.901 19.948 1.00 0.00 C     |
| ATOM 10 N THR 3 26.618 17.385 28.815 1.00 0.00 N     | ATOM 68 C LEU 9 22.179 23.764 20.561 1.00 0.00 C       |
| ATOM 11 CA THR 3 25.442 16.910 28.117 1.00 0.00 C    | ATOM 69 O LEU 9 21.836 24.507 19.643 1.00 0.00 O       |
| ATOM 12 CB THR 3 24.826 15.711 28.831 1.00 0.00 C    | ATOM 70 N MET 10 21.856 22.470 20.606 1.00 0.00 N      |
| ATOM 13 CG2 THR 3 25.846 14.579 28.895 1.00 0.00 C   | ATOM 71 CA MET 10 21.067 21.841 19.566 1.00 0.00 C     |
| ATOM 14 OG1 THR 3 24.450 16.089 30.159 1.00 0.00 O   | ATOM 72 CB MET 10 20.844 20.363 19.865 1.00 0.00 C     |
| ATOM 15 C THR 3 24.378 17.996 28.032 1.00 0.00 C     | ATOM 73 CG MET 10 20.013 19.738 18.749 1.00 0.00 C     |
| ATOM 16 O THR 3 23.783 18.205 26.977 1.00 0.00 O     | ATOM 74 SD MET 10 19.739 17.982 19.089 1.00 0.00 S     |
| ATOM 17 N SER 4 24.141 18.688 29.148 1.00 0.00 N     | ATOM 75 CE MET 10 18.772 17.537 17.663 1.00 0.00 C     |
| ATOM 18 CA SER 4 23.154 19.748 29.196 1.00 0.00 C    | ATOM 76 C MET 10 19.702 22.501 19.437 1.00 0.00 C      |
| ATOM 19 CB SER 4 23.085 20.371 30.587 1.00 0.00 C    | ATOM 77 O MET 10 19.244 22.778 18.331 1.00 0.00 O      |
| ATOM 20 OG SER 4 22.103 21.411 30.594 1.00 0.00 O    | ATOM 78 N PHE 11 19.050 22.753 20.575 1.00 0.00 N      |
| ATOM 21 C SER 4 23.488 20.854 28.206 1.00 0.00 C     | ATOM 79 CA PHE 11 17.744 23.378 20.587 1.00 0.00 C     |
| ATOM 22 O SER 4 22.614 21.335 27.489 1.00 0.00 O     | ATOM 80 CB PHE 11 17.230 23.549 22.013 1.00 0.00 C     |
| ATOM 23 N ARG 5 24.760 21.258 28.169 1.00 0.00 N     | ATOM 81 CG PHE 11 15.869 24.193 22.127 1.00 0.00 C     |
| ATOM 24 CA ARG 5 25.205 22.304 27.269 1.00 0.00 C    | ATOM 82 CD1 PHE 11 15.297 24.402 23.388 1.00 0.00 C    |
| ATOM 25 CB ARG 5 26.698 22.569 27.432 1.00 0.00 C    | ATOM 83 CE1 PHE 11 14.036 25.000 23.495 1.00 0.00 C    |
| ATOM 26 CG ARG 5 27.126 23.672 26.470 1.00 0.00 C    | ATOM 84 CZ PHE 11 13.346 25.390 22.340 1.00 0.00 C     |
| ATOM 27 CD ARG 5 28.619 23.937 26.632 1.00 0.00 C    | ATOM 85 CE2 PHE 11 13.918 25.182 21.080 1.00 0.00 C    |
| ATOM 28 NE ARG 5 29.072 25.005 25.712 1.00 0.00 N    | ATOM 86 CD2 PHE 11 15.180 24.584 20.973 1.00 0.00 C    |
| ATOM 29 CZ ARG 5 30.332 25.426 25.655 1.00 0.00 C    | ATOM 87 C PHE 11 17.789 24.754 19.940 1.00 0.00 C      |
| ATOM 30 NH1 ARG 5 31.283 24.911 26.429 1.00 0.00 N   | ATOM 88 O PHE 11 16.922 25.097 19.140 1.00 0.00 O      |
| ATOM 31 NH2 ARG 5 30.628 26.393 24.792 1.00 0.00 N1+ | ATOM 89 N LYS 12 18.805 25.547 20.291 1.00 0.00 N      |
| ATOM 32 C ARG 5 24.956 21.921 25.818 1.00 0.00 C     | ATOM 90 CA LYS 12 18.959 26.881 19.745 1.00 0.00 C     |
| ATOM 33 O ARG 5 24.470 22.733 25.033 1.00 0.00 O     | ATOM 91 CB LYS 12 20.199 27.565 20.312 1.00 0.00 C     |
| ATOM 34 N HIP 6 25.290 20.679 25.462 1.00 0.00 N     | ATOM 92 CG LYS 12 20.326 28.962 19.714 1.00 0.00 C     |
| ATOM 35 CA HIP 6 25.101 20.193 24.109 1.00 0.00 C    | ATOM 93 CD LYS 12 21.565 29.647 20.280 1.00 0.00 C     |
| ATOM 36 CB HIP 6 25.565 18.747 23.976 1.00 0.00 C    | ATOM 94 CE LYS 12 21.691 31.044 19.684 1.00 0.00 C     |
| ATOM 37 CG HIP 6 25.408 18.151 22.598 1.00 0.00 C    | ATOM 95 NZ LYS 12 22.886 31.704 20.230 1.00 0.00 N1+   |
| ATOM 38 ND1 HIP 6 25.784 16.844 22.313 1.00 0.00 N1+ | ATOM 96 C LYS 12 19.101 26.840 18.230 1.00 0.00 C      |
| ATOM 39 CE1 HIP 6 25.528 16.613 21.039 1.00 0.00 C   | ATOM 97 O LYS 12 18.475 27.626 17.523 1.00 0.00 O      |
| ATOM 40 NE2 HIP 6 25.015 17.694 20.504 1.00 0.00 N   | ATOM 98 N THR 13 19.930 25.918 17.732 1.00 0.00 N      |
| ATOM 41 CD2 HIP 6 24.923 18.676 21.441 1.00 0.00 C   | ATOM 99 CA THR 13 20.151 25.778 16.307 1.00 0.00 C     |
| ATOM 42 C HIP 6 23.635 20.251 23.706 1.00 0.00 C     | ATOM 100 CB THR 13 21.138 24.654 16.013 1.00 0.00 C    |
| ATOM 43 O HIP 6 23.308 20.689 22.605 1.00 0.00 O     | ATOM 101 CG2 THR 13 22.472 24.960 16.687 1.00 0.00 C   |
| ATOM 44 N LYS 7 22.751 19.807 24.601 1.00 0.00 N     | ATOM 102 OG1 THR 13 20.621 23.421 16.519 1.00 0.00 O   |
| ATOM 45 CA LYS 7 21.326 19.809 24.337 1.00 0.00 C    | ATOM 103 C THR 13 18.853 25.459 15.579 1.00 0.00 C     |
| ATOM 46 CB LYS 7 20.546 19.251 25.523 1.00 0.00 C    | ATOM 104 O THR 13 18.561 26.044 14.538 1.00 0.00 O     |
| ATOM 47 CG LYS 7 19.055 19.271 25.205 1.00 0.00 C    | ATOM 105 N GLU 14 18.071 24.528 16.132 1.00 0.00 N     |
| ATOM 48 CD LYS 7 18.275 18.712 26.392 1.00 0.00 C    | ATOM 106 CA GLU 14 16.810 24.135 15.536 1.00 0.00 C    |
| ATOM 49 CE LYS 7 16.784 18.732 26.075 1.00 0.00 C    | ATOM 107 CB GLU 14 16.122 23.057 16.367 1.00 0.00 C    |
| ATOM 50 NZ LYS 7 16.032 18.194 27.218 1.00 0.00 N1+  | ATOM 108 CG GLU 14 14.814 22.677 15.715 1.00 0.00 C    |
| ATOM 51 C LYS 7 20.820 21.220 24.070 1.00 0.00 C     | ATOM 109 CD GLU 14 14.126 21.597 16.547 1.00 0.00 C    |
| ATOM 52 O LYS 7 20.056 21.442 23.135 1.00 0.00 O     | ATOM 110 OE1 GLU 14 13.340 21.983 17.453 1.00 0.00 O   |
| ATOM 53 N LYS 8 21.250 22.175 24.898 1.00 0.00 N     | ATOM 111 OE2 GLU 14 14.393 20.398 16.270 1.00 0.00 O1- |
| ATOM 54 CA LYS 8 20.841 23.557 24.750 1.00 0.00 C    | ATOM 112 C GLU 14 15.861 25.320 15.433 1.00 0.00 C     |
| ATOM 55 CB LYS 8 21.476 24.436 25.823 1.00 0.00 C    | ATOM 113 O GLU 14 16.204 26.431 15.829 1.00 0.00 O     |
| ATOM 56 CG LYS 8 21.023 25.879 25.632 1.00 0.00 C    | ATOM 114 N NHE 15 14.662 25.088 14.899 1.00 0.00 N     |
| ATOM 57 CD LYS 8 21.658 26.757 26.706 1.00 0.00 C    | TER 115 NHE 15                                         |
| ATOM 58 CE LYS 8 21.203 28.201 26.516 1.00 0.00 C    |                                                        |
